# Supplementary material for: Backward translation of circular RNAs
Source: Research Square preprint supplement (doi:10.21203/rs.3.rs-5558507/v1), 2025-01-22
Supplement: Supplementary file 1 [file 125c91bc4a9c97ae651cf514.xlsx]

## Sheet: transcriptome
Species	Tissue	BioProject	SRA Experiment	Number of circRNAs
Homo sapiens	Bladder	PRJNA381054	SRR5398213	509
			SRR5398214	1113
			SRR5398215	721
			SRR5398216	2536
			SRR5398217	1307
			SRR5398218	1139
		PRJNA631256	SRR11735816	15
			SRR11735817	15
			SRR11735818	9
			SRR11735819	18
			SRR11735820	16
			SRR11735821	15
	Brain	PRJNA839035	SRR19243439	282
			SRR19243440	207
			SRR19243441	217
			SRR19243442	175
			SRR19243443	118
			SRR19243444	157
			SRR19243445	500
			SRR19243446	104
			SRR19243447	164
			SRR19243448	100
			SRR19243449	122
			SRR19243450	238
			SRR19243451	274
			SRR19243452	152
			SRR19243453	130
			SRR19243454	340
			SRR19243455	304
			SRR19243456	187
			SRR19243457	121
			SRR19243458	120
			SRR19243459	166
			SRR19243460	297
			SRR19243461	144
			SRR19243462	141
			SRR19243463	191
			SRR19243464	137
			SRR19243465	199
			SRR19243466	151
			SRR19243467	362
			SRR19243468	320
			SRR19243469	237
			SRR19243470	44
			SRR19243471	59
			SRR19243472	21
			SRR19243473	203
			SRR19243474	308
			SRR19243475	289
			SRR19243476	35
			SRR19243477	247
			SRR19243478	292
			SRR19243479	103
			SRR19243480	184
			SRR19243481	252
			SRR19243482	196
			SRR19243483	173
			SRR19243484	67
			SRR19243485	203
	Colon	PRJNA675665	SRR13013388	154
			SRR13013389	151
			SRR13013390	247
			SRR13013391	198
			SRR13013392	315
			SRR13013393	173
			SRR13013394	222
			SRR13013395	154
			SRR13013396	117
			SRR13013397	185
			SRR13013398	116
			SRR13013399	198
			SRR13013400	129
			SRR13013401	157
			SRR13013402	174
			SRR13013403	132
			SRR13013404	128
			SRR13013405	110
			SRR13013406	198
			SRR13013407	210
			SRR13013408	252
			SRR13013409	179
			SRR13013410	197
			SRR13013411	207
		PRJNA843315	SRR19435688	499
			SRR19435689	668
			SRR19435690	561
			SRR19435691	1065
			SRR19435692	691
			SRR19435693	752
			SRR19435694	439
			SRR19435695	773
			SRR19435696	472
			SRR19435697	704
			SRR19435698	780
			SRR19435699	1397
	Liver	PRJNA512451	SRR8382598	122
			SRR8382599	70
			SRR8382600	62
			SRR8382601	113
			SRR8382602	63
			SRR8382603	108
			SRR8382604	66
			SRR8382605	84
			SRR8382606	78
			SRR8382607	66
			SRR8382608	111
			SRR8382609	101
			SRR8382610	93
			SRR8382611	106
			SRR8382612	69
			SRR8382613	104
			SRR8382614	128
			SRR8382615	78
			SRR8382616	28
			SRR8382617	39
			SRR8382618	28
			SRR8382619	45
			SRR8382620	112
			SRR8382621	116
			SRR8382622	106
			SRR8382623	112
			SRR8382624	136
			SRR8382625	90
			SRR8382626	119
			SRR8382627	79
			SRR8382628	105
			SRR8382629	94
			SRR8382630	129
			SRR8382631	85
			SRR8382632	73
			SRR8382633	126
			SRR8382634	112
			SRR8382635	80
			SRR8382636	77
			SRR8382637	49
			SRR8382638	133
			SRR8382639	77
			SRR8382640	102
			SRR8382641	107
			SRR8382642	120
			SRR8382643	76
			SRR8382644	103
			SRR8382645	95
			SRR8382646	111
			SRR8382647	81
			SRR8382648	79
			SRR8382649	121
			SRR8382650	107
			SRR8382651	41
			SRR8382652	35
			SRR8382653	24
			SRR8382654	54
			SRR8382655	90
			SRR8382656	127
			SRR8382657	62
			SRR8382658	168
			SRR8382659	144
			SRR8382660	83
			SRR8382661	129
			SRR8382662	95
			SRR8382663	107
			SRR8382664	63
			SRR8382665	95
			SRR8382666	133
			SRR8382667	91
	Lung	PRJNA555772	SRR9722032	86
			SRR9722033	56
	Pancreas	PRJNA591376	SRR10522340	3100
			SRR10522341	2615
			SRR10522342	1286
			SRR10522343	1554
	Stomach	PRJNA497366	SRR8074319	1372
			SRR8074320	2138
			SRR8074321	1935
			SRR8074322	2747
		PRJNA638934	SRR11999303	187
			SRR11999304	173
			SRR11999305	143
			SRR11999306	167
			SRR11999307	152
			SRR11999308	116
			SRR11999309	149
			SRR11999310	124
			SRR11999311	116
			SRR11999312	117
		PRJNA796293	SRR17551590	2123
			SRR17551591	2439
			SRR17551592	1785
			SRR17551593	2390
			SRR17551594	2861
			SRR17551595	1918
	Thyroid	PRJNA707434	SRR13884832	816
			SRR13884833	1502
			SRR13884834	846
			SRR13884835	1441
			SRR13884836	692
			SRR13884837	1681
Mus musculus	/	PRJNA615249	SRR11425580	1597
			SRR11425581	1764
			SRR11425582	1684
		PRJNA680762	SRR13142109	1168
			SRR13142110	1253
			SRR13142111	1237
			SRR13142115	3037
			SRR13142116	2491
			SRR13142117	3156
			SRR13142121	2496
			SRR13142122	1701
			SRR13142123	2197
Danio rerio	/	PRJNA189536	SRR726540	37
			SRR726541	35
			SRR726542	55
		PRJNA556992	SRR9849850	620
			SRR9849851	180
			SRR9849852	495
			SRR9849853	628
			SRR9849854	311
			SRR9849855	442
			SRR9849856	545
			SRR9849857	416
			SRR9849858	39
			SRR9849859	176
			SRR9849860	43
			SRR9849861	143
			SRR9849862	194
			SRR9849863	139
			SRR9849864	310
			SRR9849865	253
			SRR9849866	4
		PRJNA783180	SRR17026704	126
			SRR17026705	162
			SRR17026706	125
			SRR17026707	119
			SRR17026708	123
			SRR17026709	122
			SRR17026710	83
			SRR17026711	123
			SRR17026712	109
		PRJNA922890	SRR23060055	140
			SRR23060056	130
			SRR23060057	152
			SRR23060058	140
			SRR23060059	140
			SRR23060060	134
			SRR23060061	125
			SRR23060062	136
			SRR23060063	126
Drosophila melanogaster	/	PRJNA241181	SRR1191323	19
			SRR1191324	33
			SRR1191327	147
			SRR1191328	223
			SRR1191331	17
			SRR1191332	42
			SRR1191335	231
			SRR1191336	148
			SRR1737268	76
		PRJNA822424	SRR18575339	44
			SRR18575340	68
			SRR18575342	60
			SRR18575343	71
			SRR18575345	25
			SRR18575346	60
			SRR18575349	38
			SRR18575350	68
			SRR18575351	47
			SRR18575352	39
		PRJNA888117	SRR21839197	1565
		/	SRR1197272	108
			SRR1197273	126
			SRR1197274	95
			SRR1197275	107
			SRR1197276	99
			SRR1197279	103
			SRR1197293	139
			SRR1197294	126
			SRR1197303	297
			SRR1197359	163
			SRR1197361	166
			SRR1197362	130
			SRR1197383	295
			SRR1197472	135
			SRR1197473	154
			SRR1197474	126
			SRR1197481	107
			SRR1197484	99
			SRR1197485	119
			SRR1197486	105
Caenorhabditis elegans	/	PRJNA269175	SRR1692362	88
			SRR1692364	88
			SRR1692366	88
			SRR1692368	92
			SRR1692370	16
			SRR1692372	40
		PRJNA357503	SRR5123640	138
			SRR5123641	144
			SRR5123642	139
			SRR5123643	78
			SRR5123644	97
			SRR5123645	72
			SRR5123646	149
			SRR5123647	139
			SRR5123650	154
			SRR5123651	104
		PRJNA629826	SRR11680788	24
			SRR11680789	30
			SRR11680790	27
Saccharomyces cerevisiae	/	PRJEB47969	ERR6929392	18
			ERR6929393	15
			ERR6929394	14
			ERR6929395	14
			ERR6929396	12
			ERR6929397	14
			ERR6929398	12
		PRJEB48099	ERR7052292	20
			ERR7052293	17
			ERR7052294	13
		PRJNA1073072	SRR27880674	9
			SRR27880675	23
			SRR27880676	16
			SRR27880677	16
			SRR27880678	8
			SRR27880679	6
			SRR27880680	10
			SRR27880681	8
			SRR27880682	7
			SRR27880683	9
			SRR27880684	8
			SRR27880685	16
			SRR27880686	20
			SRR27880687	11
			SRR27880688	11
			SRR27880689	7
			SRR27880690	6
			SRR27880691	9
		PRJNA748179	SRR15219466	12
			SRR15219467	8
			SRR15219468	9
			SRR15219469	13
			SRR15219470	9
			SRR15219494	12
			SRR15219495	11
			SRR15219496	9
			SRR15219497	13
			SRR15219498	9
			SRR15219499	16
			SRR15219500	14
			SRR15219501	10
			SRR15219502	7
			SRR15219503	10
			SRR15219504	11
			SRR15219505	10
			SRR15219506	9
			SRR15219507	9
		PRJNA869293	SRR21068074	13
			SRR21068075	12
			SRR21068076	12
			SRR21068077	8
			SRR21068078	13
			SRR21068079	14
			SRR21068080	10
			SRR21068081	11
			SRR21068082	10
		PRJNA902132	SRR22319482	12
			SRR22319483	6
			SRR22319484	8
			SRR22319485	14
			SRR22319486	9
			SRR22319487	18
			SRR22319488	12
			SRR22319489	6
			SRR22319490	10
		PRJNA905561	SRR22426458	16
			SRR22426459	21
			SRR22426460	12
			SRR22426461	17
			SRR22426462	10
			SRR22426463	12
		PRJNA954406	SRR24136066	10
			SRR24136067	16

## Sheet: proteome
Species	Tissue	Dataset	Backward translation non-cross BSJ (BN)	Backward translation cross BSJ (BB)	The number of raw files
Homo sapiens	Bladder	PXD004380	460	34	1080
		PXD010260	415	39	22
		PXD020194	253	57	22
	Brain	PXD037133	6696	812	16
	Colon	PXD019504	48	18	66
		PXD021314	2100	306	8
		PXD028504	1281	244	4
	Liver	PXD004873	2463	564	76
		PXD006512	304876	40602	1488
		PXD014709	435	121	18
		PXD026782	933	161	6
	Lung	PXD027008	331	28	10
	Pancreas	PXD026371	147	48	65
		PXD032800	3567	499	72
	Stomach	PXD008840	689	137	1015
		PXD011821	3249	860	300
	Thyroid	PXD002732	801	97	16
		PXD007532	3411	445	320
	Ascites	PXD003351	217	55	36
	Exosomes	PXD025825	322	56	12
		PXD019387	227	73	8
		PXD030325	3093	328	8
	Plasma	PXD024997	7711	1282	10
		PXD005777	3172	525	56
		PXD012480	293	61	75
	Serum	PXD005156	1426	215	90
		PXD029304	985	190	10
Mus musculus	/	PXD002563	262	77	40
		PXD013380	87	20	4
		PXD014144	1096	296	270
		PXD025201	73	31	8
		PXD025830	259	85	43
Danio rerio	/	PXD004209	12	10	114
		PXD016847	18	2	12
		PXD039348	59	36	40
Drosophila melanogaster	/	PXD000455	1	1	119
		PXD003318	62	4	5
		PXD005691	190	28	68
		PXD005713	165	22	56
		PXD013387	556	95	90
Caenorhabditis elegans	/	PXD004561	118	9	82
		PXD006676	21	4	12
		PXD034107	3	0	146
Saccharomyces cerevisiae	/	PXD011725	26	14	24
		PXD012803	5	1	30
		PXD015674	10	9	18
		PXD031412	1	1	4
		PXD037944	4	3	18

## Sheet: translatome
Species	Tissue	BioProject	SRA Experiment	Backward translation non-cross BSJ (BN)	Backward translation cross BSJ (BB)
Homo sapiens	Blood	PRJNA171135	SRR525273	196274	8385
			SRR525274	197675	8849
			SRR525275	198361	8881
			SRR525276	191721	7399
			SRR525277	191712	7432
			SRR525278	192543	7596
	Colon	PRJNA419990	SRR6326586	196160	8779
			SRR6326587	194667	8436
			SRR6326588	193348	8116
			SRR6326589	202930	9860
			SRR6326590	192597	8210
			SRR6326591	193895	8462
			SRR6326592	187615	7212
			SRR6326603	197401	8486
			SRR6326604	193777	8060
			SRR6326605	200197	8715
			SRR6326606	191432	7665
			SRR6326607	196089	8846
			SRR6326608	192800	7819
			SRR6326609	189136	7344
			SRR6387877	189893	7756
			SRR6387878	186169	7021
	Liver	PRJNA369742	SRR5227288	185633	7331
			SRR5227289	187166	7754
			SRR5227290	187116	7686
			SRR5227291	189029	7935
			SRR5227292	196023	9536
			SRR5227293	186032	7451
			SRR5227294	194095	8990
			SRR5227295	193223	8816
			SRR5227296	186965	7607
			SRR5227297	193254	9112
			SRR5227298	185932	7126
			SRR5227299	186257	7422
			SRR5227300	189961	8341
			SRR5227301	186783	7563
			SRR5227302	193125	9014
			SRR5227303	187628	7573
			SRR5227304	192850	8928
			SRR5227305	186345	7575
			SRR5227306	189472	8337
			SRR5227308	193193	9255
			SRR5227310	359671	24424
			SRR5227312	340449	22691
		PRJNA391171	SRR5720006	141474	28582
			SRR5720008	47626	6284
		PRJNA529885	SRR8815719	30859	7152
			SRR8815720	29785	6868
	Lung	PRJNA390535	SRR6263266	177533	4585
			SRR6263268	177535	4599
			SRR6263270	177616	4609
			SRR6263272	177660	4638
	Pancreas	PRJNA703954	SRR13762817	177618	4616
			SRR13762818	177643	4616
			SRR13762819	177647	4618
			SRR13762820	177628	4616
			SRR13762821	177644	4623
			SRR13762822	177663	4614
			SRR13762823	177608	4626
			SRR13762824	177638	4611
			SRR13762825	178094	4812
			SRR13762826	178081	4834
			SRR13762827	178029	4805
			SRR13762828	178055	4831
			SRR13762829	177897	4730
			SRR13762830	177967	4754
			SRR13762831	178021	4757
			SRR13762832	178010	4778
			SRR13762833	177750	4644
			SRR13762834	177811	4667
			SRR13762835	177792	4658
			SRR13762836	177804	4672
			SRR13762837	177632	4621
			SRR13762838	177664	4609
			SRR13762839	177646	4636
			SRR13762840	177663	4640
Mus musculus	/	PRJNA219480	SRR989509	3948	1808
			SRR989513	3450	1595
		PRJNA262909	SRR1596101	10165	3891
			SRR1596102	5178	2356
		PRJNA263261	SRR1605301	72210	25406
			SRR1605302	75216	26321
			SRR1605303	70597	24806
		PRJNA275789	SRR1810487	2115	1047
			SRR1810488	2317	1097
		PRJNA279465	SRR1930188	3909	1447
			SRR1930189	3939	1461
			SRR1930190	4957	1767
			SRR1930191	3916	1447
			SRR1930192	4866	1679
			SRR1930193	5298	1743
			SRR1930194	4925	1729
			SRR1930195	4076	1507
			SRR1930196	4109	1457
			SRR1930197	4214	1597
			SRR1930198	4023	1467
			SRR1930199	5885	2280
			SRR1930200	4456	1552
			SRR1930201	4374	1571
			SRR1930202	5026	1728
			SRR1930203	4069	1434
			SRR1930204	4788	1756
			SRR1930205	4939	1722
			SRR1930206	4324	1535
			SRR1930207	4997	1547
			SRR1930208	4450	1584
			SRR1930209	1940	673
			SRR1930210	1846	646
			SRR1930211	3142	1132
			SRR1930212	2553	850
			SRR1930213	3811	1342
			SRR1930214	2328	894
			SRR1930215	3470	1333
		PRJNA282960	SRR2007769	4434	1621
			SRR2007770	2632	1002
			SRR2007771	16187	4129
			SRR2007772	21513	5174
			SRR2007773	6084	2266
			SRR2007774	971	509
			SRR2007775	8684	2704
			SRR2007776	4762	1600
			SRR2007777	3100	1365
			SRR2007778	1938	926
			SRR2007779	3197	1409
			SRR2007780	3329	1371
			SRR2007781	3787	1647
			SRR2007782	3481	1544
			SRR2007783	2133	1087
			SRR2007784	4768	1967
			SRR2007785	3315	1425
			SRR2007786	2196	1014
			SRR2007787	8206	2464
			SRR2007788	3181	1458
		PRJNA287766	SRR2075122	1238	409
			SRR2075123	921	333
		PRJNA292862	SRR2163140	1245	543
			SRR2163141	1229	566
			SRR2163142	1025	427
		PRJNA445295	SRR12671761	1901	795
			SRR12671762	1775	660
			SRR12671763	3546	1486
			SRR12671764	1886	735
			SRR12671765	2979	1239
			SRR12671766	2020	764
			SRR12671767	1779	730
			SRR12671768	2841	1132
			SRR12671769	1709	655
			SRR12671770	2104	752
			SRR12671771	2319	821
			SRR12671772	2235	911
			SRR6880571	2525	1271
			SRR6880572	2140	1180
			SRR6880573	2843	1467
			SRR6880574	2846	1435
			SRR6880575	3526	1854
			SRR6880576	3763	1881
			SRR6880577	1173	684
			SRR6880578	1857	973
			SRR6880579	3951	1883
			SRR6880580	3080	1510
			SRR6880581	2164	1166
			SRR6880582	2428	1331
			SRR6880583	2723	1281
			SRR6880584	3460	1547
			SRR6880585	750	355
			SRR6880586	722	390
			SRR6880587	4859	2204
			SRR6880588	5186	2318
			SRR6880589	4594	1996
			SRR6880590	5067	2063
			SRR6880591	4703	1967
			SRR6880592	1891	971
			SRR6880593	1639	884
			SRR6880594	1546	813
			SRR6880595	1659	854
			SRR6880596	3128	1546
			SRR6880597	2867	1477
			SRR6880598	3010	1462
			SRR6880599	2836	1420
			SRR6880600	2373	1119
			SRR6880601	2410	1153
			SRR6880602	2185	1052
			SRR6880603	1205	627
			SRR6880604	1459	790
			SRR6880605	1114	602
			SRR6880606	1186	657
			SRR6880607	1429	744
			SRR6880608	1587	800
			SRR6880609	2081	1083
			SRR6880610	1444	777
			SRR6880611	662	346
			SRR6880612	570	304
			SRR6880613	473	274
			SRR6880614	2769	1175
			SRR6880615	2013	871
			SRR6880616	2819	1196
			SRR6880617	2896	1317
			SRR6880618	3007	1346
			SRR6880619	1679	909
			SRR6880620	2580	1233
			SRR6880621	3403	1696
			SRR6880622	2335	1165
			SRR6880623	2591	1302
			SRR6880624	2498	1343
			SRR6880625	1983	1071
			SRR6880626	2634	1430
			SRR6880627	1522	823
			SRR6880628	2686	1309
			SRR6880629	1067	576
			SRR6880630	2059	961
			SRR6880631	3909	1796
			SRR6880632	2038	1049
			SRR6880633	3274	1611
			SRR6880634	1757	1002
			SRR6880635	3978	1984
			SRR6880636	3152	1560
			SRR6880637	3819	1951
			SRR6880638	2539	1183
			SRR6880639	1549	849
			SRR6880640	2307	1109
			SRR6880641	3572	1676
			SRR6880642	1779	943
			SRR6880643	2764	1316
			SRR6880644	2866	1370
			SRR6880645	2622	1369
			SRR6880646	3897	1986
			SRR6880647	2533	1209
			SRR6880648	1825	896
			SRR6880649	2019	971
			SRR6880650	3864	1843
			SRR6880651	1458	765
			SRR6880652	1919	1001
			SRR6880653	3068	1466
			SRR6880654	1184	689
			SRR6880655	1938	950
			SRR6880656	1099	638
		PRJNA760922	SRR15724816	4685	2116
			SRR15724817	2436	1241
			SRR15724818	3319	1573
			SRR15724828	4480	2117
			SRR15724829	2363	1187
			SRR15724830	3282	1560
			SRR15724840	4627	2114
			SRR15724841	2384	1241
			SRR15724842	3250	1610
			SRR15724852	4625	2147
			SRR15724853	2397	1231
			SRR15724854	3418	1667
			SRR15724864	4452	2056
			SRR15724865	2398	1191
			SRR15724866	3238	1545
			SRR15724876	4546	2094
			SRR15724877	2473	1211
			SRR15724878	3303	1555
			SRR15724888	4651	2066
			SRR15724889	2466	1236
			SRR15724890	3317	1633
			SRR15724900	4652	2139
			SRR15724901	2317	1185
			SRR15724902	3288	1598
Danio rerio	/	PRJNA150397	SRR392998	97	43
			SRR392999	137	71
			SRR393000	127	63
			SRR393001	187	112
			SRR393002	45	19
			SRR393003	65	38
			SRR393004	45	23
			SRR393005	65	39
			SRR393006	52	42
			SRR393007	147	75
			SRR393008	69	47
			SRR393009	149	85
		PRJNA206070	SRR870722	244	126
			SRR870723	270	124
			SRR870724	241	133
			SRR870725	29	13
			SRR870726	25	18
			SRR870727	29	17
			SRR870728	24	11
			SRR870729	24	15
			SRR870730	32	7
			SRR870731	24	17
			SRR870732	22	15
			SRR870733	33	17
		PRJNA715464	SRR13998262	179	96
			SRR13998264	194	106
		PRJNA871254	SRR21140656	97	46
			SRR21140657	104	70
		PRJNA872137	SRR21218377	667	279
			SRR21218378	489	197
		PRJNA918384	SRR22969808	420	226
			SRR22969809	356	223
			SRR22969812	403	261
			SRR22969813	448	267
			SRR22969816	425	235
			SRR22969817	453	262
Drosophila melanogaster	/	PRJEB7901	ERR690847	416	112
		PRJNA213294	SRR942878	913	180
			SRR942879	852	160
			SRR942880	804	145
			SRR942881	824	170
		PRJNA258156	SRR1548656	745	150
			SRR1548657	598	155
			SRR1548658	1048	177
			SRR1548659	1249	216
		PRJNA295955	SRR2442929	308	72
			SRR2442930	321	78
		PRJNA306373	SRR3031124	765	174
			SRR3031125	1055	223
			SRR3031126	948	201
			SRR3031127	1030	206
			SRR3031128	763	180
			SRR3031129	1380	259
			SRR3031130	956	192
			SRR3031131	1190	235
			SRR3031133	1051	209
			SRR3031134	888	194
			SRR7262143	855	163
			SRR7262146	856	155
		PRJNA390134	SRR5667267	206	62
			SRR5667268	73	44
			SRR5667269	35	33
		PRJNA432508	SRR6661158	842	150
			SRR6661159	897	158
			SRR6661160	809	144
			SRR6661161	663	125
		PRJNA466150	SRR7132288	143	63
			SRR7132289	220	73
			SRR7132290	32	34
			SRR7132291	421	124
		PRJNA573922	SRR10174361	219	82
			SRR10174368	262	88
			SRR10174369	305	90
			SRR10174370	227	71
			SRR10174375	107	66
			SRR10174376	134	59
			SRR10174377	152	71
			SRR10174378	223	79
			SRR10174379	164	65
			SRR10174380	120	44
			SRR10174381	90	39
			SRR10174382	166	69
		PRJNA700841	SRR13664944	151	43
			SRR13664945	144	40
			SRR13664946	412	103
		PRJNA714407	SRR13961020	214	66
			SRR13961021	452	94
		PRJNA865860	SRR20820093	352	88
			SRR20820094	390	100
			SRR20820095	826	173
Caenorhabditis elegans	/	PRJNA170771	SRR522871	105	21
			SRR522872	83	11
			SRR522883	167	33
			SRR522895	120	12
			SRR522897	141	26
		PRJNA208993	SRR914334	94	17
			SRR914336	148	16
			SRR914337	103	22
			SRR914338	82	12
		PRJNA230377	SRR1041221	974	81
			SRR1041222	580	57
			SRR1041223	945	75
			SRR1041224	982	85
			SRR1041225	891	75
			SRR1041226	958	79
			SRR1041227	930	76
			SRR1041228	656	61
			SRR1041229	988	84
			SRR1041230	1010	87
			SRR1041231	902	85
			SRR1041232	552	58
			SRR1041233	951	85
			SRR1041234	947	82
			SRR1041235	935	83
			SRR1041236	954	79
			SRR1041237	948	86
			SRR1041238	956	88
			SRR1041239	636	70
			SRR1041240	980	98
			SRR1041241	614	67
			SRR1041242	409	48
			SRR1041243	613	64
			SRR1041244	352	36
			SRR1041245	618	62
			SRR1041246	226	28
			SRR1041247	603	65
			SRR1041248	157	25
			SRR1041249	546	63
			SRR1041250	619	59
			SRR1041251	228	33
			SRR1041252	636	68
			SRR1041253	628	62
			SRR1041254	233	27
			SRR1041255	553	57
			SRR1041256	251	27
			SRR1041257	635	68
			SRR1041258	358	44
		PRJNA230441	SRR1041687	119	20
			SRR1041688	36	5
			SRR1041689	85	17
			SRR1041690	105	14
			SRR1041691	13	3
			SRR1041692	89	10
			SRR1041693	115	16
			SRR1041694	48	9
			SRR1041695	92	19
			SRR1041696	94	14
			SRR1041697	106	16
			SRR1041698	117	19
			SRR1041699	29	4
			SRR1041700	110	15
		PRJNA265851	SRR1635380	125	12
			SRR1635381	130	11
			SRR1635382	141	18
			SRR1635383	120	13
		PRJNA318047	SRR3356490	117	14
			SRR3356491	77	12
			SRR3356492	102	13
			SRR3356493	114	15
			SRR3356494	123	15
			SRR3356495	110	14
			SRR3356496	118	15
			SRR3356497	119	14
			SRR3356498	138	14
			SRR3356499	109	11
			SRR3356500	132	15
		PRJNA318054	SRR3356615	606	61
			SRR3356617	515	52
			SRR3356619	535	50
			SRR3356621	525	57
			SRR3356623	551	63
			SRR3356625	541	50
			SRR3356627	539	52
			SRR3356629	527	58
			SRR3356631	518	58
			SRR3356632	513	55
			SRR3356633	505	53
		PRJNA353604	SRR5026356	169	21
			SRR5026359	99	10
			SRR5026589	132	19
			SRR5026592	112	14
			SRR5026603	148	17
			SRR5026637	122	20
		PRJNA473989	SRR7241911	138	17
		PRJNA548154	SRR11174230	26	6
			SRR11174231	37	7
		PRJNA587444	SRR10398489	136	17
			SRR10398490	133	16
			SRR10398491	102	21
		PRJNA609216	SRR11195102	85	16
			SRR11195103	85	27
			SRR11195104	76	15
		PRJNA648380	SRR12318105	78	13
			SRR12318106	82	22
			SRR12318107	109	25
			SRR12318111	135	24
			SRR12318112	132	17
			SRR12318115	38	8
			SRR12318116	102	25
		PRJNA732080	SRR14624513	94	25
			SRR14624514	94	16
			SRR14624515	100	28
			SRR14624516	85	17
		PRJNA819566	SRR18488811	44	10
			SRR18488812	37	8
		PRJNA880608	SRR21575855	223	25
			SRR21575856	343	44
			SRR21575857	199	19
			SRR21575858	181	16
		PRJNA885130	SRR21743113	5	1
			SRR21743114	4	2
			SRR21743115	7	1
			SRR21743116	7	1
			SRR21743121	5	2
			SRR21743122	6	2
Saccharomyces cerevisiae	/	PRJNA342004	SRR4175351	3	10
			SRR4175352	7	8
			SRR4175353	6	9
			SRR4175354	7	10
		PRJNA345383	SRR4343397	29	22
			SRR4343398	27	22
			SRR4343405	24	22
			SRR4343406	24	16
		PRJNA472972	SRR7214424	5	12
			SRR7214425	6	8
			SRR7214426	8	7
			SRR7214427	5	11
			SRR7214428	5	9
			SRR7214429	4	8
		PRJNA472988	SRR7215536	24	24
			SRR7215537	25	26
		PRJNA473987	SRR7241903	27	23
			SRR7241904	16	21
