# Supplementary material for: Backward translation of circular RNAs
Source: Research Square preprint supplement (doi:10.21203/rs.3.rs-5558507/v1), 2025-01-22
Supplement: Supplementary file 2 [file 5040ee01cba45ad14e6ccece.xlsx]

## Sheet: Plasmid cloning primers
Plasmid	Primer	Sequence（5'→3'）
UAS-dm.circSCRIB_bt_p	circSCRIB-FP	GAACTCTGAATAGGGAATTGGAATTCATGCGATCCTTTGACGCT
	circSCRIB-RP	CTCTAGAGGTACCCTCGAGCCGCGGCCGCTCAGGGTCCTGCCAGTCCA
pcDNA3.1-hs.circMGC27382 BTIS-(bw)-eGFP/pcDNA3.1-hs.circIFITM1 BTIS-(bw)-eGFP/pcDNA3.1-hs.circHSH2D BTIS-(bw)-eGFP/pcDNA3.1-hs.circITIH4 BTIS-(bw)-eGFP	Up-intron FP1	GAGAACTCTGAATAGGGAATTGGGAATTCGTGACAGTGGAGATTGTACAGTTTTTTCCTC
	Up-intron RP1	CGGGGCACGACGACGGGCTAGGAGGCAGCACATCGAG
	eGFP FP1	TCCTAGCCCGTCGTCGTGCCCCG
	eGFP RP1	CTTGTTGGTGATGGACTCGTGGGTCAGGTTCG
	Down-intron FP1	CGAACCTGACCCACGAGTCCATCACCAACAAGAAGCAAGGTTTCATTTAGGGGAAG
	Down-intron RP1	GTAAGGTTCCTTCACAAAGATCCTCTAGACTAATGCCTACCAGGTTCATTACGC
pcDNA3.1-hs.circHSH2D BTIS-stemloop destructed-(bw)-eGFP	Up-intron FP1	tggctagcgtttaaacttaagcttGTGACAGTGGAGATTGTACAGTTTTTTCCTC
	stemloop RP1	CTGTATTGGGAAAGTGCTGGGATTATAG
	stemloop FP2	ATCCCAGCACTTTCCCAATACAGGTGTGAGCCACTACGC
	Down-intron RP1	cagcgggtttaaacgggccctctagACTAATGCCTACCAGGTTCATTACGC
pcDNA3.1-dm.circUNC-5 BTIS-(bw)-eGFP	Up-intron FP1	tggctagcgtttaaacttaagcttGTGACAGTGGAGATTGTACAGTTTTTTCCTC
	UNC-5-Up-RP1	cagcgggtttaaacgggccctctagACTAATGCCTACCAGGTTCATTACGC
	UNC-5-I-FP2	GAACGAGTGGTATGTTGACTGAAGGCCAGCAGC
	UNC-5-I-RP2	GTACCTGCTCGACATGTTCATTGTTCATAGTGCCCCGCGGAACTA
	UNC-5-Down-FP3	GCACTATGAACAATGAACATGTCGAGCAGGTACGGC
	Down-intron RP1	cagcgggtttaaacgggccctctagACTAATGCCTACCAGGTTCATTACGC
pcDNA3.1-dm.circSCRIB BTIS-(bw)-eGFP	Up-intron FP1	tggctagcgtttaaacttaagcttGTGACAGTGGAGATTGTACAGTTTTTTCCTC
	SCRIB-RP1	GTCAGCCTGACGGACCTCGATCTGGCCCAGAATCTACTCGAGGCACTGCCCGATGGCATTGCCAAGCTGAGCAGACTGACTATCCTGAAGTTGGATCAGAATCGATTGCAGCGGTTGAACGATACCACTCGTTCCCGCTCCTC
	SCRIB-FP2	AGATCGAGGTCCGTCAGGCTGACCAGACCGCTGATCTCGTTGGGCAGCTCCTCCAGTCGATTTTCGGAGACATCGAGGTAGGTCAGTTTGGTCAGGAGTCCCAGCTCCGGCGGCAATCGCTGCAGAATGAACATGTCGAGCAGGTACGG
	Down-intron RP1	cagcgggtttaaacgggccctctagACTAATGCCTACCAGGTTCATTACGC
pcDNA3.1-hs.circCAPN15 BTIS1-(bw)-eGFP	Up-intron FP1	tggctagcgtttaaacttaagcttGTGACAGTGGAGATTGTACAGTTTTTTCCTC
	CAPN15-1-I-RP1	GTGAGAAAAGAGATCACACGCTTTTGCTTTATCACAGAAGGAAGGGTCAAGAGAACGTCTACCACTCGTTCCCGCTCCTCGA
	CAPN15-1-I-FP2	TAAAGCAAAAGCGTGTGATCTCTTTTCTCACCAAGGAATAAAACGTCTCTGAATACCACAGACAATGAACATGTCGAGCAGGTACGGC
	Down-intron RP1	cagcgggtttaaacgggccctctagACTAATGCCTACCAGGTTCATTACGC
pcDNA3.1-hs.circCAPN15 BTIS2-(bw)-eGFP	Up-intron FP1	tggctagcgtttaaacttaagcttGTGACAGTGGAGATTGTACAGTTTTTTCCTC
	CAPN15-2-I-RP1	GTGAGAAAAGAGATCACACGCTTTTGCTTTATCACAGAAGGAAGGGTCAAGAGAACGTCTACCACTCGTTCCCGCTCCTCGA
	CAPN15-2-I-FP2	TAAAGCAAAAGCGTGTGATCTCTTTTCTCACCAAGGAATAAAACGTCTCTGAATACCACAGACAATGAACATGTCGAGCAGGTACGGC
	Down-intron RP1	cagcgggtttaaacgggccctctagACTAATGCCTACCAGGTTCATTACGC
pcDNA3.1-hs.circHSH2D BTIS-outATG-(bw)-eGFP	Up-intron FP1	tggctagcgtttaaacttaagcttGTGACAGTGGAGATTGTACAGTTTTTTCCTC
	outATG RP1	GTGAGCCACTCGTTCCCGCTCCTCG
	outATG FP2	GAGGAGCGGGAACGAGTGGCTCACGCCTATAATCCCAGCAC
	Down-intron RP1	cagcgggtttaaacgggccctctagACTAATGCCTACCAGGTTCATTACGC
pcDNA3.1-hs.circHSH2D BTIS-ATG mutates to ACG-(bw)-eGFP	Up-intron FP1	tggctagcgtttaaacttaagcttGTGACAGTGGAGATTGTACAGTTTTTTCCTC
	ACG RP1	CGTGAGCCGCCACTCGTTCCCGCTCCTCG
	ACG FP2	GCGGGAACGAGTGGCGGCTCACGCCTATAATCCCAGCAC
	Down-intron RP1	cagcgggtttaaacgggccctctagACTAATGCCTACCAGGTTCATTACGC

## Sheet: Donor plasmid primers
Plasmid	Primer	Sequence（5'→3'）
dm.circSCRIB KO Donor Plasmid	SC-ko-5arm-FP1	ATTgtaatacgactcactatagggcgaattgggtacCTGATAGACAGTGACAAGGCCATATGC
	SC-ko-5arm-RP1	TTTCCTAGTGTGTCGTTCAATCGCTGCAAGCGGT
	SC-ko-3arm-FP2	GCGATTGAACGACACACTAGGAAAGTGAG
	SC-ko-3arm-RP2	accctcactaaagggaacaaaagctggagctcGAGCAGACAGCGCCAAATGTG
hs.circCAPN15 KI Donor Plasmid	CAPN15-5arm-FP1	atacgactcactatagggcgaattgggtacCCGGACGCAGCGATGTCTCAGATAC
	CAPN15-5arm-RP1	CGAGGCCACCGAGGACTAAAGACTATTCGGGTGTGATGGTG
	CAPN15-3HO-FP2	CGAATAGTCTTTAGTCCTCGGTGGCCTCGGC
	CAPN15-3HO-RP2	CACCTCCATCACCACCTCCTCCATCACCACCACCTCCAAGATACCTATCGTGGCTCCGTCACTAGTTCCTC
	CAPN15-3arm-FP3	GTGGTGATGGAGGAGGTGGTGATGGAGGTGGAGGTTTCTATAAAGACAGGGTCTCACTGTGT
	CAPN15-3arm-RP3	ctcactaaagggaacaaaagctggagctcAGAAACAGCATGATTCACACACACAG

## Sheet: Gene editing sgRNA sites
		direction：5'→3'
dm.circSCRIB KO	Target 1	TGGATCAGAATCGATTGCAG
	Target 2	CAGCGGTTGAACGATACGCT
hs.circCAPN15 KO	Target 1	GTAGGCAGGGGAGGTAGCAG
	Target 2	CTACCTCCCCTGCCTACCTT
hs.circCAPN15 KI	Target 1	CCACACCCGGATAGTGTTTA
	Target 2	CACCCGGATAGTGTTTAGTT

## Sheet: qPCR primers
	Drosophila
	Primer	Sequence（5'→3'）
	D-TUB-Q-FP	GCAGGGCTTCCTCATCTTC
	D-TUB-Q-RP	GCTTGGACTTCTTGCCGTAG
	dm.circSCRIB_bt_p-Q-FP	ACTCAGACGCCCTGTTGTTC
	dm.circSCRIB_bt_p-Q-RP	GGTCGCTCATCCCGTCTATG
	YQ-SCRIB-FP1	GTGTTTGCCACACCCACTGC
	YQ-SCRIB-RP1	CGTTGTGTGCAGCTGGATGT
	Cell
	Primer	Sequence（5'→3'）
	Ho-β-actin-FP	GCAAAGACCTGTACGCCAAC
	Ho-β-actin-RP	ATCTTCATTGTGCTGGGTGC
	hs.circCAPN15_bt_p-Q-FP	GCAGTGTCGGGAAGAAGGTC
	hs.circCAPN15_bt_p-Q-RP	GGTCCGACCAGAGTTTGAGA
	Other
	Primer	Sequence（5'→3'）
	(bw)eGFP-Q-FP	CGACCACTACCAGCAGAACA
	(bw)eGFP-Q-RP	ATGTGATCGCGCTTCTCGTT

## Sheet: CircRNA validation primers
	Primer	Sequence（5'→3'）
	hs.circCAPN15-FP	CCCCGGACGTCGAGACTC
	hs.circCAPN15-RP	CGTGACTCTACAGGGGAGTCG
	dm.circSCRIB-FP	ATCTGGGCGTGCTGAGTCTG
	dm.circSCRIB-RP	GTGCAGACCCGGCAGATAA
