# Supplementary material for: Backward translation of circular RNAs
Source: Research Square preprint supplement (doi:10.21203/rs.3.rs-5558507/v1), 2025-01-22
Supplement: Supplementary file 3 [file 7146125c7668549e5274fb4a.xlsx]

## Sheet: Sheet1
CircRNA_ID	Kozak	m6A	IRES-like (6nt)	IRES-like	Species
ERR6929393_2785gene=UBI4	non-Kozak	m6A	non-6nt	IRES	Saccharomyces cerevisiae
ERR6929393_5236gene=intergenic	non-Kozak	non-m6A	non-6nt	non-IRES	Saccharomyces cerevisiae
ERR6929393_911gene=FLO9	non-Kozak	non-m6A	non-6nt	non-IRES	Saccharomyces cerevisiae
ERR6929394_5101gene=RPL40B	non-Kozak	m6A	non-6nt	IRES	Saccharomyces cerevisiae
ERR6929395_3075gene=VMA13	non-Kozak	non-m6A	non-6nt	IRES	Saccharomyces cerevisiae
ERR6929395_3252gene=KRE2	non-Kozak	non-m6A	non-6nt	IRES	Saccharomyces cerevisiae
ERR6929398_2900gene=VPS29	non-Kozak	non-m6A	non-6nt	IRES	Saccharomyces cerevisiae
ERR6929398_4245gene=FLO9	non-Kozak	non-m6A	non-6nt	non-IRES	Saccharomyces cerevisiae
ERR7052293_1427gene=TDH3	non-Kozak	m6A	non-6nt	non-IRES	Saccharomyces cerevisiae
ERR7052294_4193gene=intergenic	non-Kozak	non-m6A	non-6nt	IRES	Saccharomyces cerevisiae
SRR1191336_3000gene=kuz	non-Kozak	non-m6A	non-6nt	IRES	Drosophila melanogaster
SRR1191327_11027gene=SK	non-Kozak	non-m6A	non-6nt	non-IRES	Drosophila melanogaster
SRR1191327_5065gene=fz	non-Kozak	non-m6A	non-6nt	non-IRES	Drosophila melanogaster
SRR10043573_107gene=Hsc70-4	non-Kozak	non-m6A	non-6nt	IRES	Drosophila melanogaster
SRR10043573_258gene=l(1)G0320	non-Kozak	m6A	non-6nt	IRES	Drosophila melanogaster
SRR10043573_273gene=Yp1	non-Kozak	non-m6A	non-6nt	IRES	Drosophila melanogaster
SRR10043573_465gene=CG7214	non-Kozak	non-m6A	non-6nt	non-IRES	Drosophila melanogaster
SRR10043573_527gene=Vha13	non-Kozak	non-m6A	non-6nt	non-IRES	Drosophila melanogaster
SRR10043573_638gene=RpS21	non-Kozak	non-m6A	non-6nt	non-IRES	Drosophila melanogaster
SRR10043573_640gene=COX6B	non-Kozak	non-m6A	non-6nt	IRES	Drosophila melanogaster
SRR10043573_654gene=Msp300	non-Kozak	non-m6A	non-6nt	non-IRES	Drosophila melanogaster
SRR10043573_676gene=lncRNA_Hsromega	non-Kozak	non-m6A	non-6nt	IRES	Drosophila melanogaster
SRR10043574_178gene=eEF1alpha1	non-Kozak	non-m6A	non-6nt	IRES	Drosophila melanogaster
SRR10043574_231gene=UQCR-C2	non-Kozak	m6A	non-6nt	non-IRES	Drosophila melanogaster
SRR10043574_294gene=Ran	non-Kozak	non-m6A	non-6nt	IRES	Drosophila melanogaster
SRR10043574_457gene=RpS29	non-Kozak	m6A	non-6nt	non-IRES	Drosophila melanogaster
SRR10043574_492gene=28SrRNA-Psi_CR45851	non-Kozak	non-m6A	non-6nt	non-IRES	Drosophila melanogaster
SRR10043574_592gene=lncRNA_Hsromega	non-Kozak	m6A	non-6nt	IRES	Drosophila melanogaster
SRR10043574_612gene=Ubi-p63E	non-Kozak	non-m6A	non-6nt	IRES	Drosophila melanogaster
SRR10043574_614gene=Ubi-p63E	non-Kozak	non-m6A	non-6nt	non-IRES	Drosophila melanogaster
SRR10043574_627gene=Msp300	non-Kozak	m6A	non-6nt	non-IRES	Drosophila melanogaster
SRR10043574_635gene=Msp300	non-Kozak	non-m6A	non-6nt	IRES	Drosophila melanogaster
SRR10043574_636gene=Msp300	non-Kozak	non-m6A	non-6nt	IRES	Drosophila melanogaster
SRR10043574_637gene=Msp300	non-Kozak	non-m6A	non-6nt	IRES	Drosophila melanogaster
SRR10043574_638gene=Msp300	non-Kozak	non-m6A	non-6nt	IRES	Drosophila melanogaster
SRR10043574_63gene=intergenic	non-Kozak	non-m6A	non-6nt	IRES	Drosophila melanogaster
SRR10043574_648gene=Msp300	non-Kozak	m6A	non-6nt	IRES	Drosophila melanogaster
SRR10043574_653gene=COX8	non-Kozak	non-m6A	non-6nt	non-IRES	Drosophila melanogaster
SRR10043574_662gene=lncRNA_Hsromega	non-Kozak	non-m6A	non-6nt	IRES	Drosophila melanogaster
SRR10043574_663gene=lncRNA_Hsromega	non-Kozak	m6A	non-6nt	IRES	Drosophila melanogaster
SRR10043574_664gene=lncRNA_Hsromega	non-Kozak	non-m6A	non-6nt	IRES	Drosophila melanogaster
SRR10043575_328gene=ND4	non-Kozak	non-m6A	non-6nt	IRES	Drosophila melanogaster
SRR10043575_466gene=CG6770	non-Kozak	non-m6A	non-6nt	non-IRES	Drosophila melanogaster
SRR10043575_508gene=RpS15	non-Kozak	non-m6A	non-6nt	non-IRES	Drosophila melanogaster
SRR10043575_541gene=RpL21	non-Kozak	non-m6A	non-6nt	non-IRES	Drosophila melanogaster
SRR10043575_545gene=Ubi-p5E	non-Kozak	non-m6A	non-6nt	non-IRES	Drosophila melanogaster
SRR10043575_579gene=Ubi-p5E	non-Kozak	non-m6A	non-6nt	non-IRES	Drosophila melanogaster
SRR10043575_583gene=Msp300	non-Kozak	non-m6A	non-6nt	IRES	Drosophila melanogaster
SRR10043575_584gene=Msp300	non-Kozak	non-m6A	non-6nt	IRES	Drosophila melanogaster
SRR10043575_590gene=Msp300	non-Kozak	non-m6A	non-6nt	IRES	Drosophila melanogaster
SRR10043575_593gene=COX8	non-Kozak	non-m6A	non-6nt	non-IRES	Drosophila melanogaster
SRR10043575_59gene=lncRNA_Hsromega	non-Kozak	non-m6A	non-6nt	IRES	Drosophila melanogaster
SRR10043575_603gene=lncRNA_Hsromega	non-Kozak	non-m6A	non-6nt	IRES	Drosophila melanogaster
SRR10043576_424gene=14-3-3zeta	non-Kozak	m6A	non-6nt	IRES	Drosophila melanogaster
SRR10043576_453gene=CG6770	non-Kozak	non-m6A	non-6nt	non-IRES	Drosophila melanogaster
SRR10043576_567gene=RpL36A	non-Kozak	non-m6A	non-6nt	non-IRES	Drosophila melanogaster
SRR10043576_581gene=Msp300	non-Kozak	non-m6A	non-6nt	non-IRES	Drosophila melanogaster
SRR10043576_604gene=lncRNA_Hsromega	non-Kozak	m6A	non-6nt	IRES	Drosophila melanogaster
SRR10043576_623gene=Ubi-p5E	non-Kozak	non-m6A	non-6nt	non-IRES	Drosophila melanogaster
SRR10043576_635gene=Ubi-p5E	non-Kozak	non-m6A	non-6nt	non-IRES	Drosophila melanogaster
SRR10043577_231gene=Prm	non-Kozak	non-m6A	non-6nt	IRES	Drosophila melanogaster
SRR10043577_280gene=tmod	non-Kozak	non-m6A	non-6nt	IRES	Drosophila melanogaster
SRR10043577_411gene=Cpr49Ae	non-Kozak	non-m6A	non-6nt	IRES	Drosophila melanogaster
SRR10043577_578gene=Doa	non-Kozak	non-m6A	non-6nt	IRES	Drosophila melanogaster
SRR10043577_616gene=CG31740	non-Kozak	m6A	non-6nt	IRES	Drosophila melanogaster
SRR10043577_720gene=CG15219	non-Kozak	non-m6A	non-6nt	IRES	Drosophila melanogaster
SRR10043577_726gene=Msp300	non-Kozak	non-m6A	non-6nt	non-IRES	Drosophila melanogaster
SRR10043577_750gene=lov	non-Kozak	non-m6A	non-6nt	IRES	Drosophila melanogaster
SRR10043577_751gene=Msp300	non-Kozak	non-m6A	non-6nt	non-IRES	Drosophila melanogaster
SRR10043577_756gene=lncRNA_Hsromega	non-Kozak	m6A	non-6nt	IRES	Drosophila melanogaster
SRR10043577_764gene=lncRNA_Hsromega	non-Kozak	non-m6A	non-6nt	IRES	Drosophila melanogaster
SRR10043577_772gene=lncRNA_Hsromega	non-Kozak	non-m6A	non-6nt	IRES	Drosophila melanogaster
SRR10043577_778gene=Ank2	non-Kozak	m6A	non-6nt	IRES	Drosophila melanogaster
SRR10043577_784gene=Ank2	non-Kozak	non-m6A	non-6nt	IRES	Drosophila melanogaster
SRR10043577_796gene=eEF5	non-Kozak	non-m6A	non-6nt	IRES	Drosophila melanogaster
SRR10043578_157gene=Vha16-1	non-Kozak	non-m6A	non-6nt	IRES	Drosophila melanogaster
SRR10043578_319gene=CG5028	non-Kozak	non-m6A	non-6nt	IRES	Drosophila melanogaster
SRR10043578_515gene=CG31740	non-Kozak	m6A	non-6nt	IRES	Drosophila melanogaster
SRR10043578_557gene=Ubi-p5E	non-Kozak	non-m6A	non-6nt	non-IRES	Drosophila melanogaster
SRR10043578_624gene=lncRNA_Hsromega	non-Kozak	m6A	non-6nt	IRES	Drosophila melanogaster
SRR10043578_634gene=Msp300	non-Kozak	non-m6A	non-6nt	IRES	Drosophila melanogaster
SRR10043578_646gene=lncRNA_Hsromega	non-Kozak	non-m6A	non-6nt	IRES	Drosophila melanogaster
SRR10043578_68gene=pAbp	non-Kozak	non-m6A	non-6nt	IRES	Drosophila melanogaster
SRR10043579_370gene=Gpdh1	non-Kozak	non-m6A	non-6nt	IRES	Drosophila melanogaster
SRR10043579_461gene=Rab7	non-Kozak	non-m6A	non-6nt	non-IRES	Drosophila melanogaster
SRR10043579_560gene=CG5762	non-Kozak	m6A	non-6nt	non-IRES	Drosophila melanogaster
SRR10043579_564gene=lncRNA_Hsromega	non-Kozak	m6A	non-6nt	IRES	Drosophila melanogaster
SRR10043579_565gene=lncRNA_Hsromega	non-Kozak	non-m6A	non-6nt	IRES	Drosophila melanogaster
SRR10043579_567gene=lncRNA_Hsromega	non-Kozak	m6A	non-6nt	IRES	Drosophila melanogaster
SRR10043579_571gene=lncRNA_Hsromega	non-Kozak	non-m6A	non-6nt	IRES	Drosophila melanogaster
SRR10043579_652gene=Ubi-p63E	non-Kozak	non-m6A	non-6nt	IRES	Drosophila melanogaster
SRR10043579_757gene=ND-B16.6	non-Kozak	non-m6A	non-6nt	IRES	Drosophila melanogaster
SRR10043579_840gene=snRNA_7SK	non-Kozak	non-m6A	non-6nt	non-IRES	Drosophila melanogaster
SRR10043579_860gene=lncRNA_Hsromega	non-Kozak	non-m6A	non-6nt	IRES	Drosophila melanogaster
SRR10043579_862gene=lncRNA_Hsromega	non-Kozak	non-m6A	non-6nt	IRES	Drosophila melanogaster
SRR10043579_866gene=lncRNA_Hsromega	non-Kozak	non-m6A	non-6nt	IRES	Drosophila melanogaster
SRR10043579_868gene=lncRNA_Hsromega	non-Kozak	non-m6A	non-6nt	IRES	Drosophila melanogaster
SRR10043580_153gene=Cam	non-Kozak	non-m6A	non-6nt	IRES	Drosophila melanogaster
SRR10043580_175gene=intergenic	non-Kozak	non-m6A	non-6nt	non-IRES	Drosophila melanogaster
SRR10043580_3gene=bt	non-Kozak	non-m6A	non-6nt	IRES	Drosophila melanogaster
SRR10043580_596gene=lncRNA_Hsromega	non-Kozak	m6A	non-6nt	IRES	Drosophila melanogaster
SRR10043580_625gene=intergenic	non-Kozak	non-m6A	non-6nt	IRES	Drosophila melanogaster
SRR10043580_626gene=lncRNA_Hsromega	non-Kozak	non-m6A	non-6nt	IRES	Drosophila melanogaster
SRR10043580_627gene=lncRNA_Hsromega	non-Kozak	non-m6A	non-6nt	IRES	Drosophila melanogaster
SRR11425580_10000gene=Klhl29	non-Kozak	m6A	non-6nt	IRES	Mus musculus
SRR11425580_100032gene=Scfd2	non-Kozak	non-m6A	non-6nt	IRES	Mus musculus
SRR11425580_100192gene=Togaram2	non-Kozak	m6A	non-6nt	non-IRES	Mus musculus
SRR11425580_100361gene=Epb41l2	non-Kozak	m6A	non-6nt	IRES	Mus musculus
SRR11425580_100448gene=Naf1	non-Kozak	m6A	non-6nt	IRES	Mus musculus
SRR11425580_100506gene=Jade3	non-Kozak	m6A	non-6nt	IRES	Mus musculus
SRR11425580_100546gene=Gm34857	non-Kozak	non-m6A	non-6nt	IRES	Mus musculus
SRR11425580_100818gene=Zfp68	non-Kozak	non-m6A	non-6nt	IRES	Mus musculus
SRR11425580_100911gene=Nhej1	non-Kozak	m6A	non-6nt	non-IRES	Mus musculus
SRR11425580_100947gene=Apc	non-Kozak	non-m6A	non-6nt	IRES	Mus musculus
SRR11425580_101020gene=Rbks	non-Kozak	non-m6A	non-6nt	IRES	Mus musculus
SRR11425580_101198gene=Map3k4	non-Kozak	m6A	non-6nt	IRES	Mus musculus
SRR11425580_101245gene=Gpr158	non-Kozak	m6A	non-6nt	IRES	Mus musculus
SRR11425580_101612gene=Dync1i2	non-Kozak	non-m6A	non-6nt	IRES	Mus musculus
SRR11425580_101679gene=Nup88	non-Kozak	m6A	non-6nt	IRES	Mus musculus
SRR11425580_101748gene=Bzw1	non-Kozak	non-m6A	non-6nt	IRES	Mus musculus
SRR11425580_101768gene=Atraid	non-Kozak	non-m6A	non-6nt	IRES	Mus musculus
SRR11425580_101822gene=Smpd3	non-Kozak	non-m6A	non-6nt	IRES	Mus musculus
SRR11425580_101881gene=Zfp141	non-Kozak	non-m6A	non-6nt	IRES	Mus musculus
SRR11425580_101935gene=Zcwpw2	non-Kozak	non-m6A	non-6nt	IRES	Mus musculus
SRR11425580_101957gene=Nars2	non-Kozak	non-m6A	non-6nt	IRES	Mus musculus
SRR11425580_102027gene=Ppp1cb	non-Kozak	m6A	non-6nt	IRES	Mus musculus
SRR11425580_102084gene=Riok1	non-Kozak	non-m6A	non-6nt	non-IRES	Mus musculus
SRR11425580_102127gene=Dcbld1	non-Kozak	m6A	non-6nt	IRES	Mus musculus
SRR11425580_102346gene=Zfp639	non-Kozak	m6A	non-6nt	IRES	Mus musculus
SRR11425580_102432gene=Lactb2	non-Kozak	m6A	non-6nt	IRES	Mus musculus
SRR11425580_102459gene=Nkrf	non-Kozak	m6A	non-6nt	IRES	Mus musculus
SRR11425580_10245gene=Tcf20	non-Kozak	m6A	non-6nt	IRES	Mus musculus
SRR11425580_102489gene=Mlh3	non-Kozak	m6A	non-6nt	IRES	Mus musculus
SRR11425580_102551gene=Faim	non-Kozak	non-m6A	non-6nt	non-IRES	Mus musculus
SRR11425580_102725gene=Ankrd44	non-Kozak	non-m6A	non-6nt	IRES	Mus musculus
SRR11425580_102739gene=Pithd1	non-Kozak	non-m6A	non-6nt	non-IRES	Mus musculus
SRR11425580_102891gene=Rpl24	non-Kozak	non-m6A	non-6nt	IRES	Mus musculus
SRR11425580_102913gene=Rabepk	non-Kozak	m6A	non-6nt	non-IRES	Mus musculus
SRR11425580_103104gene=Atr	non-Kozak	non-m6A	non-6nt	IRES	Mus musculus
SRR11425580_103272gene=Dennd3	non-Kozak	non-m6A	non-6nt	IRES	Mus musculus
SRR11425580_103482gene=Rpl18	non-Kozak	non-m6A	non-6nt	non-IRES	Mus musculus
SRR11425580_103528gene=Efl1	non-Kozak	non-m6A	non-6nt	IRES	Mus musculus
SRR11425580_103756gene=Kmt5a	non-Kozak	non-m6A	non-6nt	IRES	Mus musculus
SRR11425580_103815gene=2700097O09Rik	non-Kozak	non-m6A	non-6nt	IRES	Mus musculus
SRR11425580_103905gene=Fgf12	non-Kozak	non-m6A	non-6nt	IRES	Mus musculus
SRR11425580_103970gene=Gas5	non-Kozak	non-m6A	non-6nt	IRES	Mus musculus
SRR11425580_103976gene=Mprip	non-Kozak	non-m6A	non-6nt	IRES	Mus musculus
SRR11425580_104000gene=Ddx47	non-Kozak	non-m6A	non-6nt	IRES	Mus musculus
SRR11425580_104061gene=Sacm1l	non-Kozak	non-m6A	non-6nt	IRES	Mus musculus
SRR11425580_104171gene=Ppp2cb	non-Kozak	m6A	non-6nt	non-IRES	Mus musculus
SRR11425580_104486gene=Wdr36	non-Kozak	m6A	non-6nt	IRES	Mus musculus
SRR11425580_104497gene=Ddx56	non-Kozak	non-m6A	non-6nt	IRES	Mus musculus
SRR11425580_104679gene=Glipr1	non-Kozak	non-m6A	non-6nt	IRES	Mus musculus
SRR11425580_104706gene=Cstf3	non-Kozak	non-m6A	non-6nt	IRES	Mus musculus
SRR11425580_104707gene=Cstf3	non-Kozak	non-m6A	non-6nt	IRES	Mus musculus
SRR11425580_104712gene=Nedd9	non-Kozak	non-m6A	non-6nt	non-IRES	Mus musculus
SRR11425580_104792gene=Mipol1	non-Kozak	non-m6A	non-6nt	IRES	Mus musculus
SRR11425580_104846gene=Utp11	non-Kozak	non-m6A	non-6nt	IRES	Mus musculus
SRR11425580_104901gene=Ssbp1	non-Kozak	non-m6A	non-6nt	IRES	Mus musculus
SRR11425580_105035gene=Mipol1	non-Kozak	non-m6A	non-6nt	IRES	Mus musculus
SRR11425580_105242gene=Psph	non-Kozak	non-m6A	non-6nt	non-IRES	Mus musculus
SRR11425580_105302gene=Slc3a1	non-Kozak	non-m6A	non-6nt	IRES	Mus musculus
SRR11425580_105490gene=Sumf1	non-Kozak	non-m6A	non-6nt	IRES	Mus musculus
SRR11425580_105651gene=Tulp3	non-Kozak	m6A	non-6nt	non-IRES	Mus musculus
SRR11425580_106084gene=Ehd2	non-Kozak	non-m6A	non-6nt	non-IRES	Mus musculus
SRR11425580_106099gene=Rhot1	non-Kozak	m6A	non-6nt	IRES	Mus musculus
SRR11425580_106128gene=Sarnp	non-Kozak	m6A	non-6nt	IRES	Mus musculus
SRR11425580_106141gene=Mapk14	non-Kozak	non-m6A	non-6nt	IRES	Mus musculus
SRR11425580_106190gene=Gm35241	non-Kozak	non-m6A	non-6nt	IRES	Mus musculus
SRR11425580_106530gene=Prelid2	non-Kozak	m6A	non-6nt	IRES	Mus musculus
SRR11425580_106673gene=Tpd52l2	non-Kozak	non-m6A	non-6nt	IRES	Mus musculus
SRR11425580_106755gene=Nr2c1	non-Kozak	m6A	non-6nt	non-IRES	Mus musculus
SRR11425580_106758gene=Ptprg	non-Kozak	non-m6A	non-6nt	IRES	Mus musculus
SRR11425580_107082gene=Plp2	non-Kozak	m6A	non-6nt	IRES	Mus musculus
SRR11425580_107223gene=Scamp5	non-Kozak	non-m6A	non-6nt	IRES	Mus musculus
SRR11425580_107661gene=Gid8	non-Kozak	non-m6A	non-6nt	IRES	Mus musculus
SRR11425580_107897gene=Rubcnl	non-Kozak	m6A	non-6nt	IRES	Mus musculus
SRR11425580_107914gene=Mfsd14a	non-Kozak	m6A	non-6nt	non-IRES	Mus musculus
SRR11425580_108242gene=Sptan1	non-Kozak	non-m6A	non-6nt	IRES	Mus musculus
SRR11425580_108429gene=Sin3a	non-Kozak	non-m6A	non-6nt	IRES	Mus musculus
SRR11425580_108768gene=Atp13a3	non-Kozak	non-m6A	non-6nt	IRES	Mus musculus
SRR11425580_108807gene=Zmym5	non-Kozak	non-m6A	non-6nt	non-IRES	Mus musculus
SRR11425580_108897gene=Bcap29	non-Kozak	non-m6A	non-6nt	IRES	Mus musculus
SRR11425580_109022gene=Polr3g	non-Kozak	non-m6A	non-6nt	IRES	Mus musculus
SRR11425580_109027gene=Tpp2	non-Kozak	non-m6A	non-6nt	IRES	Mus musculus
SRR11425580_109045gene=Thoc7	non-Kozak	non-m6A	non-6nt	non-IRES	Mus musculus
SRR11425580_109166gene=Slc25a26	non-Kozak	m6A	non-6nt	IRES	Mus musculus
SRR11425580_109197gene=Zfp316	non-Kozak	non-m6A	non-6nt	non-IRES	Mus musculus
SRR11425580_109211gene=Tulp3	non-Kozak	non-m6A	non-6nt	IRES	Mus musculus
SRR11425580_109317gene=B230303A05Rik	non-Kozak	non-m6A	non-6nt	IRES	Mus musculus
SRR11425580_109868gene=Usp9x	non-Kozak	non-m6A	non-6nt	IRES	Mus musculus
SRR11425580_109933gene=Pip4p2	non-Kozak	non-m6A	non-6nt	non-IRES	Mus musculus
SRR11425580_110090gene=Agap2	non-Kozak	non-m6A	non-6nt	IRES	Mus musculus
SRR11425580_110233gene=Tmem120b	non-Kozak	non-m6A	non-6nt	IRES	Mus musculus
SRR11425580_110264gene=Fbxo47	non-Kozak	m6A	non-6nt	IRES	Mus musculus
SRR11425580_110521gene=Eif4a1	non-Kozak	non-m6A	non-6nt	IRES	Mus musculus
SRR11425580_11053gene=Mtmr3	non-Kozak	non-m6A	non-6nt	IRES	Mus musculus
SRR11425580_110601gene=Zrsr2	non-Kozak	m6A	non-6nt	IRES	Mus musculus
SRR11425580_110771gene=Rbm5	non-Kozak	m6A	non-6nt	IRES	Mus musculus
SRR11425580_110830gene=Pym1	non-Kozak	non-m6A	non-6nt	IRES	Mus musculus
SRR11425580_110948gene=Ptprd	non-Kozak	non-m6A	non-6nt	IRES	Mus musculus
SRR11425580_110955gene=Blvra	non-Kozak	m6A	non-6nt	IRES	Mus musculus
SRR11425580_111163gene=Gm31432	non-Kozak	m6A	non-6nt	IRES	Mus musculus
SRR11425580_111305gene=Dtnb	non-Kozak	m6A	non-6nt	non-IRES	Mus musculus
SRR11425580_111332gene=Selenbp1	non-Kozak	non-m6A	non-6nt	non-IRES	Mus musculus
SRR11425580_111427gene=Thoc1	non-Kozak	non-m6A	non-6nt	IRES	Mus musculus
SRR11425580_111456gene=Wdr61	non-Kozak	m6A	non-6nt	non-IRES	Mus musculus
SRR11425580_112063gene=Poc1b	non-Kozak	non-m6A	non-6nt	IRES	Mus musculus
SRR11425580_112343gene=Efcab2	non-Kozak	non-m6A	non-6nt	non-IRES	Mus musculus
SRR11425580_112417gene=Npepps	non-Kozak	m6A	non-6nt	IRES	Mus musculus
SRR11425580_112838gene=Eif4a1	non-Kozak	non-m6A	non-6nt	IRES	Mus musculus
SRR11425580_112869gene=Efna5	non-Kozak	m6A	non-6nt	IRES	Mus musculus
SRR11425580_113038gene=Sult4a1	non-Kozak	m6A	non-6nt	IRES	Mus musculus
SRR11425580_113188gene=Parl	non-Kozak	m6A	non-6nt	IRES	Mus musculus
SRR11425580_113354gene=Gm27188	non-Kozak	non-m6A	non-6nt	IRES	Mus musculus
SRR11425580_11344gene=Atm	non-Kozak	m6A	non-6nt	IRES	Mus musculus
SRR11425580_114164gene=Tmod3	non-Kozak	non-m6A	non-6nt	IRES	Mus musculus
SRR11425580_114583gene=Supt3	non-Kozak	non-m6A	non-6nt	non-IRES	Mus musculus
SRR11425580_114909gene=Sgcz	non-Kozak	m6A	non-6nt	IRES	Mus musculus
SRR11425580_115176gene=Rasal2	non-Kozak	non-m6A	non-6nt	IRES	Mus musculus
SRR11425580_115396gene=Txlna	non-Kozak	non-m6A	non-6nt	non-IRES	Mus musculus
SRR11425580_115548gene=Wdfy2	non-Kozak	m6A	non-6nt	IRES	Mus musculus
SRR11425580_115566gene=Gls	non-Kozak	m6A	non-6nt	IRES	Mus musculus
SRR11425580_11566gene=Plekha5	non-Kozak	m6A	non-6nt	IRES	Mus musculus
SRR11425580_11573gene=Lcor	non-Kozak	non-m6A	non-6nt	IRES	Mus musculus
SRR11425580_1157gene=Zdhhc14	non-Kozak	m6A	non-6nt	IRES	Mus musculus
SRR11425580_115995gene=Celsr3	non-Kozak	m6A	non-6nt	non-IRES	Mus musculus
SRR11425580_116255gene=Dmtf1	non-Kozak	non-m6A	non-6nt	IRES	Mus musculus
SRR11425580_11644gene=Ssbp2	non-Kozak	m6A	non-6nt	IRES	Mus musculus
SRR11425580_116523gene=Txlng	non-Kozak	non-m6A	non-6nt	IRES	Mus musculus
SRR11425580_116586gene=Lsm1	non-Kozak	non-m6A	non-6nt	IRES	Mus musculus
SRR11425580_116778gene=E2f5	non-Kozak	non-m6A	non-6nt	IRES	Mus musculus
SRR11425580_116821gene=Mrtfb	non-Kozak	m6A	non-6nt	IRES	Mus musculus
SRR11425580_117204gene=Umad1	non-Kozak	non-m6A	non-6nt	IRES	Mus musculus
SRR11425580_117265gene=Samd1	non-Kozak	m6A	non-6nt	non-IRES	Mus musculus
SRR11425580_117488gene=Hspa5	non-Kozak	m6A	non-6nt	IRES	Mus musculus
SRR11425580_118097gene=Slc13a5	non-Kozak	m6A	non-6nt	IRES	Mus musculus
SRR11425580_118346gene=Tbc1d10b	non-Kozak	non-m6A	non-6nt	non-IRES	Mus musculus
SRR11425580_11837gene=Arid1a	non-Kozak	non-m6A	non-6nt	non-IRES	Mus musculus
SRR11425580_118873gene=Rsrc2	non-Kozak	non-m6A	non-6nt	IRES	Mus musculus
SRR11425580_119312gene=Fam193a	non-Kozak	non-m6A	non-6nt	non-IRES	Mus musculus
SRR11425580_119316gene=Frs2	non-Kozak	non-m6A	non-6nt	IRES	Mus musculus
SRR11425580_119324gene=Ncapd2	non-Kozak	non-m6A	non-6nt	IRES	Mus musculus
SRR11425580_119408gene=Snx9	non-Kozak	non-m6A	non-6nt	non-IRES	Mus musculus
SRR11425580_119799gene=Emc2	non-Kozak	non-m6A	non-6nt	IRES	Mus musculus
SRR11425580_120293gene=Zwilch	non-Kozak	non-m6A	non-6nt	IRES	Mus musculus
SRR11425580_121523gene=Tro	non-Kozak	non-m6A	non-6nt	IRES	Mus musculus
SRR11425580_12916gene=Tub	non-Kozak	non-m6A	non-6nt	IRES	Mus musculus
SRR11425580_13410gene=Papola	non-Kozak	m6A	non-6nt	IRES	Mus musculus
SRR11425580_14111gene=Cep350	non-Kozak	m6A	non-6nt	IRES	Mus musculus
SRR11425580_14112gene=Cep350	non-Kozak	m6A	non-6nt	IRES	Mus musculus
SRR11425580_14451gene=Dgkd	non-Kozak	m6A	non-6nt	IRES	Mus musculus
SRR11425580_14482gene=Telo2	non-Kozak	non-m6A	non-6nt	IRES	Mus musculus
SRR11425580_14536gene=Gspt1	non-Kozak	m6A	non-6nt	IRES	Mus musculus
SRR11425580_16043gene=Kctd3	non-Kozak	non-m6A	non-6nt	IRES	Mus musculus
SRR11425580_16085gene=Cers5	non-Kozak	non-m6A	non-6nt	IRES	Mus musculus
SRR11425580_16211gene=H6pd	non-Kozak	m6A	non-6nt	non-IRES	Mus musculus
SRR11425580_16253gene=Kcnq1	non-Kozak	m6A	non-6nt	IRES	Mus musculus
SRR11425580_16312gene=Nrip1	non-Kozak	non-m6A	non-6nt	IRES	Mus musculus
SRR11425580_16854gene=Sipa1l3	non-Kozak	non-m6A	non-6nt	non-IRES	Mus musculus
SRR11425580_16861gene=4930512B01Rik	non-Kozak	m6A	non-6nt	IRES	Mus musculus
SRR11425580_17202gene=Zfp827	non-Kozak	m6A	non-6nt	non-IRES	Mus musculus
SRR11425580_17481gene=Arhgap5	non-Kozak	m6A	non-6nt	IRES	Mus musculus
SRR11425580_18501gene=Rpap1	non-Kozak	non-m6A	non-6nt	non-IRES	Mus musculus
SRR11425580_1853gene=Usp32	non-Kozak	m6A	non-6nt	IRES	Mus musculus
SRR11425580_18661gene=Epb41l2	non-Kozak	m6A	non-6nt	non-IRES	Mus musculus
SRR11425580_18789gene=Kdm6a	non-Kozak	m6A	non-6nt	IRES	Mus musculus
SRR11425580_19234gene=Stag2	non-Kozak	non-m6A	non-6nt	IRES	Mus musculus
SRR11425580_19338gene=Dcun1d3	non-Kozak	non-m6A	non-6nt	IRES	Mus musculus
SRR11425580_19975gene=Lyzl4	non-Kozak	m6A	non-6nt	IRES	Mus musculus
SRR11425580_20013gene=Trim33	non-Kozak	non-m6A	non-6nt	IRES	Mus musculus
SRR11425580_20095gene=Osbpl9	non-Kozak	non-m6A	non-6nt	IRES	Mus musculus
SRR11425580_20304gene=Ralgapb	non-Kozak	m6A	non-6nt	IRES	Mus musculus
SRR11425580_20418gene=Senp5	non-Kozak	m6A	non-6nt	IRES	Mus musculus
SRR11425580_20687gene=Map4k2	non-Kozak	m6A	non-6nt	IRES	Mus musculus
SRR11425580_20767gene=Mapk1	non-Kozak	m6A	non-6nt	IRES	Mus musculus
SRR11425580_20979gene=Usp34	non-Kozak	m6A	non-6nt	IRES	Mus musculus
SRR11425580_21183gene=Spag5	non-Kozak	non-m6A	non-6nt	IRES	Mus musculus
SRR11425580_21304gene=Setbp1	non-Kozak	non-m6A	non-6nt	IRES	Mus musculus
SRR11425580_21871gene=Ankib1	non-Kozak	non-m6A	non-6nt	IRES	Mus musculus
SRR11425580_22277gene=Usp54	non-Kozak	m6A	non-6nt	IRES	Mus musculus
SRR11425580_22887gene=Gm26871	non-Kozak	non-m6A	non-6nt	IRES	Mus musculus
SRR11425580_23082gene=Ak4	non-Kozak	m6A	non-6nt	IRES	Mus musculus
SRR11425580_23138gene=Rab11fip5	non-Kozak	m6A	non-6nt	IRES	Mus musculus
SRR11425580_23525gene=Zfhx4	non-Kozak	non-m6A	non-6nt	IRES	Mus musculus
SRR11425580_23651gene=Npat	non-Kozak	m6A	non-6nt	IRES	Mus musculus
SRR11425580_23979gene=Pcdh11x	non-Kozak	m6A	non-6nt	IRES	Mus musculus
SRR11425580_24347gene=Fkbp5	non-Kozak	m6A	non-6nt	non-IRES	Mus musculus
SRR11425580_24680gene=Glb1	non-Kozak	m6A	non-6nt	IRES	Mus musculus
SRR11425580_24898gene=Carmil1	non-Kozak	m6A	non-6nt	IRES	Mus musculus
SRR11425580_25026gene=Usp15	non-Kozak	m6A	non-6nt	non-IRES	Mus musculus
SRR11425580_25336gene=Pign	non-Kozak	m6A	non-6nt	IRES	Mus musculus
SRR11425580_2549gene=Nav2	non-Kozak	m6A	non-6nt	IRES	Mus musculus
SRR11425580_25818gene=Lrrn3	non-Kozak	non-m6A	non-6nt	IRES	Mus musculus
SRR11425580_26033gene=Ltbp1	non-Kozak	non-m6A	non-6nt	IRES	Mus musculus
SRR11425580_26075gene=Ggnbp2	non-Kozak	m6A	non-6nt	IRES	Mus musculus
SRR11425580_2657gene=Rapgef1	non-Kozak	m6A	non-6nt	IRES	Mus musculus
SRR11425580_27064gene=Rgs6	non-Kozak	m6A	non-6nt	IRES	Mus musculus
SRR11425580_27248gene=Dis3l2	non-Kozak	non-m6A	non-6nt	IRES	Mus musculus
SRR11425580_27542gene=Snx29	non-Kozak	non-m6A	non-6nt	non-IRES	Mus musculus
SRR11425580_28071gene=Extl3	non-Kozak	m6A	non-6nt	non-IRES	Mus musculus
SRR11425580_28229gene=Taf4	non-Kozak	m6A	non-6nt	non-IRES	Mus musculus
SRR11425580_28242gene=Mdh2	non-Kozak	m6A	non-6nt	IRES	Mus musculus
SRR11425580_2825gene=Dennd10	non-Kozak	m6A	non-6nt	IRES	Mus musculus
SRR11425580_28500gene=Cyld	non-Kozak	m6A	non-6nt	IRES	Mus musculus
SRR11425580_28723gene=Lats2	non-Kozak	m6A	non-6nt	IRES	Mus musculus
SRR11425580_28731gene=Smc1a	non-Kozak	non-m6A	non-6nt	IRES	Mus musculus
SRR11425580_28752gene=Dennd1a	non-Kozak	non-m6A	non-6nt	non-IRES	Mus musculus
SRR11425580_2878gene=Rtn3	non-Kozak	non-m6A	non-6nt	IRES	Mus musculus
SRR11425580_29040gene=Rad54l2	non-Kozak	m6A	non-6nt	IRES	Mus musculus
SRR11425580_30131gene=Pogz	non-Kozak	non-m6A	non-6nt	IRES	Mus musculus
SRR11425580_30240gene=Kdm4a	non-Kozak	non-m6A	non-6nt	IRES	Mus musculus
SRR11425580_30717gene=Chsy3	non-Kozak	m6A	non-6nt	IRES	Mus musculus
SRR11425580_30742gene=Lrig2	non-Kozak	m6A	non-6nt	IRES	Mus musculus
SRR11425580_30774gene=Mfsd6	non-Kozak	m6A	non-6nt	IRES	Mus musculus
SRR11425580_3091gene=Cdk8	non-Kozak	m6A	non-6nt	IRES	Mus musculus
SRR11425580_31053gene=Far1	non-Kozak	non-m6A	non-6nt	IRES	Mus musculus
SRR11425580_31085gene=Rad21	non-Kozak	non-m6A	non-6nt	non-IRES	Mus musculus
SRR11425580_31094gene=N4bp1	non-Kozak	m6A	non-6nt	IRES	Mus musculus
SRR11425580_31511gene=Pias2	non-Kozak	m6A	non-6nt	IRES	Mus musculus
SRR11425580_31575gene=Gabpa	non-Kozak	m6A	non-6nt	non-IRES	Mus musculus
SRR11425580_31657gene=Rtn4	non-Kozak	m6A	non-6nt	IRES	Mus musculus
SRR11425580_3186gene=Zfp444	non-Kozak	m6A	non-6nt	IRES	Mus musculus
SRR11425580_32017gene=Tet1	non-Kozak	m6A	non-6nt	IRES	Mus musculus
SRR11425580_32029gene=Bend3	non-Kozak	non-m6A	non-6nt	non-IRES	Mus musculus
SRR11425580_32175gene=Zfp62	non-Kozak	non-m6A	non-6nt	IRES	Mus musculus
SRR11425580_32234gene=Fam171a1	non-Kozak	m6A	non-6nt	IRES	Mus musculus
SRR11425580_32293gene=Wrn	non-Kozak	m6A	non-6nt	IRES	Mus musculus
SRR11425580_32592gene=Minar1	non-Kozak	m6A	non-6nt	IRES	Mus musculus
SRR11425580_32676gene=Esco1	non-Kozak	m6A	non-6nt	IRES	Mus musculus
SRR11425580_32710gene=Dock9	non-Kozak	m6A	non-6nt	IRES	Mus musculus
SRR11425580_32713gene=Ephb2	non-Kozak	m6A	non-6nt	non-IRES	Mus musculus
SRR11425580_32835gene=Ptp4a2	non-Kozak	non-m6A	non-6nt	IRES	Mus musculus
SRR11425580_32996gene=Zswim6	non-Kozak	m6A	non-6nt	IRES	Mus musculus
SRR11425580_3324gene=Apba2	non-Kozak	m6A	non-6nt	IRES	Mus musculus
SRR11425580_33285gene=Mark3	non-Kozak	m6A	non-6nt	IRES	Mus musculus
SRR11425580_33476gene=Eif4g3	non-Kozak	m6A	non-6nt	IRES	Mus musculus
SRR11425580_33615gene=Septin8	non-Kozak	non-m6A	non-6nt	IRES	Mus musculus
SRR11425580_34027gene=Lpin1	non-Kozak	m6A	non-6nt	IRES	Mus musculus
SRR11425580_34105gene=Bbs4	non-Kozak	m6A	non-6nt	IRES	Mus musculus
SRR11425580_34369gene=Upp2	non-Kozak	m6A	non-6nt	IRES	Mus musculus
SRR11425580_3498gene=Gfm2	non-Kozak	m6A	non-6nt	IRES	Mus musculus
SRR11425580_35135gene=Eya3	non-Kozak	m6A	non-6nt	IRES	Mus musculus
SRR11425580_35292gene=Gpat4	non-Kozak	m6A	non-6nt	IRES	Mus musculus
SRR11425580_35341gene=Tmem87b	non-Kozak	non-m6A	non-6nt	IRES	Mus musculus
SRR11425580_36006gene=Serinc1	non-Kozak	non-m6A	non-6nt	IRES	Mus musculus
SRR11425580_36669gene=Ints3	non-Kozak	m6A	non-6nt	IRES	Mus musculus
SRR11425580_36790gene=Prdm11	non-Kozak	m6A	non-6nt	non-IRES	Mus musculus
SRR11425580_37975gene=Rnf121	non-Kozak	non-m6A	non-6nt	non-IRES	Mus musculus
SRR11425580_38228gene=Tbc1d14	non-Kozak	m6A	non-6nt	non-IRES	Mus musculus
SRR11425580_3852gene=4930402H24Rik	non-Kozak	non-m6A	non-6nt	IRES	Mus musculus
SRR11425580_38569gene=Rtf2	non-Kozak	m6A	non-6nt	non-IRES	Mus musculus
SRR11425580_38672gene=Gpatch1	non-Kozak	non-m6A	non-6nt	non-IRES	Mus musculus
SRR11425580_38675gene=Nfkbiz	non-Kozak	m6A	non-6nt	IRES	Mus musculus
SRR11425580_38763gene=Dnmbp	non-Kozak	m6A	non-6nt	IRES	Mus musculus
SRR11425580_38941gene=Tbc1d16	non-Kozak	m6A	non-6nt	non-IRES	Mus musculus
SRR11425580_39131gene=Bnc2	non-Kozak	m6A	non-6nt	non-IRES	Mus musculus
SRR11425580_39178gene=Dnajc10	non-Kozak	m6A	non-6nt	IRES	Mus musculus
SRR11425580_39566gene=Kif16b	non-Kozak	m6A	non-6nt	non-IRES	Mus musculus
SRR11425580_39671gene=Mbtd1	non-Kozak	m6A	non-6nt	IRES	Mus musculus
SRR11425580_39915gene=Zfp516	non-Kozak	m6A	non-6nt	non-IRES	Mus musculus
SRR11425580_40190gene=Inpp5a	non-Kozak	non-m6A	non-6nt	IRES	Mus musculus
SRR11425580_40399gene=Alms1	non-Kozak	m6A	non-6nt	IRES	Mus musculus
SRR11425580_40458gene=Dop1a	non-Kozak	non-m6A	non-6nt	IRES	Mus musculus
SRR11425580_40464gene=Atxn7	non-Kozak	non-m6A	non-6nt	IRES	Mus musculus
SRR11425580_40533gene=Wdr11	non-Kozak	non-m6A	non-6nt	non-IRES	Mus musculus
SRR11425580_40595gene=Zmym4	non-Kozak	m6A	non-6nt	IRES	Mus musculus
SRR11425580_4072gene=Snhg14	non-Kozak	m6A	non-6nt	IRES	Mus musculus
SRR11425580_40765gene=Nktr	non-Kozak	non-m6A	non-6nt	IRES	Mus musculus
SRR11425580_40767gene=Nktr	non-Kozak	non-m6A	non-6nt	IRES	Mus musculus
SRR11425580_40967gene=Mtif2	non-Kozak	non-m6A	non-6nt	IRES	Mus musculus
SRR11425580_40988gene=Rnf141	non-Kozak	non-m6A	non-6nt	IRES	Mus musculus
SRR11425580_41037gene=Ercc5	non-Kozak	m6A	non-6nt	non-IRES	Mus musculus
SRR11425580_41175gene=Ptpn12	non-Kozak	m6A	non-6nt	IRES	Mus musculus
SRR11425580_41281gene=Pak5	non-Kozak	m6A	non-6nt	IRES	Mus musculus
SRR11425580_41353gene=Recql	non-Kozak	m6A	non-6nt	non-IRES	Mus musculus
SRR11425580_41555gene=Rps6kc1	non-Kozak	m6A	non-6nt	IRES	Mus musculus
SRR11425580_41564gene=Fam126a	non-Kozak	non-m6A	non-6nt	IRES	Mus musculus
SRR11425580_41764gene=Zfp800	non-Kozak	m6A	non-6nt	IRES	Mus musculus
SRR11425580_42077gene=Cpsf3	non-Kozak	non-m6A	non-6nt	IRES	Mus musculus
SRR11425580_42769gene=N4bp2l2	non-Kozak	non-m6A	non-6nt	non-IRES	Mus musculus
SRR11425580_43273gene=Paip1	non-Kozak	non-m6A	non-6nt	IRES	Mus musculus
SRR11425580_43545gene=Ppib	non-Kozak	m6A	non-6nt	non-IRES	Mus musculus
SRR11425580_43560gene=Brpf3	non-Kozak	non-m6A	non-6nt	non-IRES	Mus musculus
SRR11425580_43568gene=Spata5	non-Kozak	non-m6A	non-6nt	IRES	Mus musculus
SRR11425580_43679gene=Alg9	non-Kozak	m6A	non-6nt	IRES	Mus musculus
SRR11425580_43984gene=B3glct	non-Kozak	non-m6A	non-6nt	IRES	Mus musculus
SRR11425580_44002gene=Inpp5f	non-Kozak	non-m6A	non-6nt	IRES	Mus musculus
SRR11425580_44058gene=Riok2	non-Kozak	non-m6A	non-6nt	IRES	Mus musculus
SRR11425580_44298gene=Oxr1	non-Kozak	m6A	non-6nt	non-IRES	Mus musculus
SRR11425580_44391gene=Spg7	non-Kozak	m6A	non-6nt	IRES	Mus musculus
SRR11425580_44656gene=Hid1	non-Kozak	non-m6A	non-6nt	IRES	Mus musculus
SRR11425580_45165gene=Ybx3	non-Kozak	non-m6A	non-6nt	non-IRES	Mus musculus
SRR11425580_45596gene=Tmem248	non-Kozak	m6A	non-6nt	non-IRES	Mus musculus
SRR11425580_45688gene=Wdr44	non-Kozak	non-m6A	non-6nt	IRES	Mus musculus
SRR11425580_45689gene=Wdr44	non-Kozak	non-m6A	non-6nt	IRES	Mus musculus
SRR11425580_45862gene=intergenic	non-Kozak	non-m6A	non-6nt	IRES	Mus musculus
SRR11425580_46091gene=Maml2	non-Kozak	m6A	non-6nt	IRES	Mus musculus
SRR11425580_46212gene=Emsy	non-Kozak	m6A	non-6nt	IRES	Mus musculus
SRR11425580_46340gene=Krit1	non-Kozak	non-m6A	non-6nt	IRES	Mus musculus
SRR11425580_46441gene=Ice2	non-Kozak	m6A	non-6nt	IRES	Mus musculus
SRR11425580_46618gene=Chd9	non-Kozak	m6A	non-6nt	IRES	Mus musculus
SRR11425580_46644gene=Mapk4	non-Kozak	m6A	non-6nt	non-IRES	Mus musculus
SRR11425580_46724gene=Rab23	non-Kozak	non-m6A	non-6nt	non-IRES	Mus musculus
SRR11425580_46898gene=Car4	non-Kozak	m6A	non-6nt	IRES	Mus musculus
SRR11425580_46913gene=Tdrd7	non-Kozak	m6A	non-6nt	non-IRES	Mus musculus
SRR11425580_47232gene=Rin1	non-Kozak	non-m6A	non-6nt	IRES	Mus musculus
SRR11425580_47340gene=Vkorc1l1	non-Kozak	m6A	non-6nt	IRES	Mus musculus
SRR11425580_47453gene=Ift81	non-Kozak	m6A	non-6nt	IRES	Mus musculus
SRR11425580_47783gene=Lonp2	non-Kozak	m6A	non-6nt	IRES	Mus musculus
SRR11425580_47808gene=Stam2	non-Kozak	m6A	non-6nt	IRES	Mus musculus
SRR11425580_47918gene=Cdc42	non-Kozak	m6A	non-6nt	IRES	Mus musculus
SRR11425580_47951gene=Srp68	non-Kozak	m6A	non-6nt	IRES	Mus musculus
SRR11425580_47952gene=Srp68	non-Kozak	m6A	non-6nt	IRES	Mus musculus
SRR11425580_47982gene=Canx	non-Kozak	non-m6A	non-6nt	IRES	Mus musculus
SRR11425580_48069gene=Shld2	non-Kozak	m6A	non-6nt	IRES	Mus musculus
SRR11425580_48278gene=Scaper	non-Kozak	m6A	non-6nt	non-IRES	Mus musculus
SRR11425580_48385gene=Zranb2	non-Kozak	m6A	non-6nt	IRES	Mus musculus
SRR11425580_48512gene=Sfi1	non-Kozak	m6A	non-6nt	IRES	Mus musculus
SRR11425580_48656gene=Gm32786	non-Kozak	m6A	non-6nt	IRES	Mus musculus
SRR11425580_48766gene=Rtf1	non-Kozak	non-m6A	non-6nt	non-IRES	Mus musculus
SRR11425580_48949gene=Shprh	non-Kozak	m6A	non-6nt	non-IRES	Mus musculus
SRR11425580_48956gene=Golga5	non-Kozak	m6A	non-6nt	IRES	Mus musculus
SRR11425580_49129gene=Usp5	non-Kozak	m6A	non-6nt	IRES	Mus musculus
SRR11425580_49284gene=Nfatc3	non-Kozak	m6A	non-6nt	IRES	Mus musculus
SRR11425580_49288gene=Smad2	non-Kozak	m6A	non-6nt	IRES	Mus musculus
SRR11425580_49334gene=Xpnpep3	non-Kozak	non-m6A	non-6nt	IRES	Mus musculus
SRR11425580_49422gene=Kansl1	non-Kozak	non-m6A	non-6nt	IRES	Mus musculus
SRR11425580_49591gene=Atp2c1	non-Kozak	m6A	non-6nt	IRES	Mus musculus
SRR11425580_49611gene=Dhx57	non-Kozak	m6A	non-6nt	IRES	Mus musculus
SRR11425580_49679gene=Cry1	non-Kozak	m6A	non-6nt	IRES	Mus musculus
SRR11425580_49837gene=Nrf1	non-Kozak	m6A	non-6nt	IRES	Mus musculus
SRR11425580_49850gene=Aftph	non-Kozak	m6A	non-6nt	IRES	Mus musculus
SRR11425580_50067gene=Shank1	non-Kozak	m6A	non-6nt	IRES	Mus musculus
SRR11425580_50116gene=Kat6b	non-Kozak	m6A	non-6nt	IRES	Mus musculus
SRR11425580_50180gene=Rnf103	non-Kozak	m6A	non-6nt	IRES	Mus musculus
SRR11425580_50613gene=Fech	non-Kozak	m6A	non-6nt	non-IRES	Mus musculus
SRR11425580_50970gene=Ica1	non-Kozak	non-m6A	non-6nt	IRES	Mus musculus
SRR11425580_51060gene=Slc41a2	non-Kozak	m6A	non-6nt	IRES	Mus musculus
SRR11425580_51362gene=Yes1	non-Kozak	non-m6A	non-6nt	IRES	Mus musculus
SRR11425580_51390gene=Cables1	non-Kozak	m6A	non-6nt	IRES	Mus musculus
SRR11425580_5141gene=Kif1a	non-Kozak	m6A	non-6nt	IRES	Mus musculus
SRR11425580_51578gene=Psmf1	non-Kozak	m6A	non-6nt	non-IRES	Mus musculus
SRR11425580_51579gene=Psmf1	non-Kozak	m6A	non-6nt	IRES	Mus musculus
SRR11425580_51610gene=Rnpep	non-Kozak	m6A	non-6nt	IRES	Mus musculus
SRR11425580_51612gene=Glce	non-Kozak	m6A	non-6nt	IRES	Mus musculus
SRR11425580_51617gene=Rian	non-Kozak	m6A	non-6nt	IRES	Mus musculus
SRR11425580_51782gene=Mthfd1l	non-Kozak	m6A	non-6nt	IRES	Mus musculus
SRR11425580_51884gene=Zfp61	non-Kozak	non-m6A	non-6nt	non-IRES	Mus musculus
SRR11425580_51899gene=Setd3	non-Kozak	non-m6A	non-6nt	IRES	Mus musculus
SRR11425580_52092gene=Uap1	non-Kozak	non-m6A	non-6nt	IRES	Mus musculus
SRR11425580_52431gene=Zc3h15	non-Kozak	m6A	non-6nt	non-IRES	Mus musculus
SRR11425580_52439gene=Zfp101	non-Kozak	m6A	non-6nt	IRES	Mus musculus
SRR11425580_52446gene=Ptprd	non-Kozak	m6A	non-6nt	IRES	Mus musculus
SRR11425580_52460gene=Pccb	non-Kozak	non-m6A	non-6nt	non-IRES	Mus musculus
SRR11425580_52478gene=2210408I21Rik	non-Kozak	m6A	non-6nt	IRES	Mus musculus
SRR11425580_52508gene=Ncoa6	non-Kozak	m6A	non-6nt	non-IRES	Mus musculus
SRR11425580_52543gene=Mto1	non-Kozak	m6A	non-6nt	non-IRES	Mus musculus
SRR11425580_52586gene=Ptpdc1	non-Kozak	non-m6A	non-6nt	non-IRES	Mus musculus
SRR11425580_52697gene=Insig2	non-Kozak	m6A	non-6nt	IRES	Mus musculus
SRR11425580_52714gene=Tm9sf4	non-Kozak	m6A	non-6nt	IRES	Mus musculus
SRR11425580_52838gene=Tmcc1	non-Kozak	m6A	non-6nt	IRES	Mus musculus
SRR11425580_53004gene=Zzz3	non-Kozak	m6A	non-6nt	IRES	Mus musculus
SRR11425580_53312gene=Klhl24	non-Kozak	m6A	non-6nt	IRES	Mus musculus
SRR11425580_53398gene=Adamts6	non-Kozak	m6A	non-6nt	IRES	Mus musculus
SRR11425580_53474gene=4930453N24Rik	non-Kozak	m6A	non-6nt	IRES	Mus musculus
SRR11425580_53510gene=LTO1	non-Kozak	non-m6A	non-6nt	IRES	Mus musculus
SRR11425580_53559gene=Kif2a	non-Kozak	non-m6A	non-6nt	IRES	Mus musculus
SRR11425580_53612gene=Lin54	non-Kozak	m6A	non-6nt	IRES	Mus musculus
SRR11425580_53853gene=Mbtd1	non-Kozak	m6A	non-6nt	IRES	Mus musculus
SRR11425580_53928gene=Prkdc	non-Kozak	m6A	non-6nt	IRES	Mus musculus
SRR11425580_54547gene=Ano10	non-Kozak	m6A	non-6nt	non-IRES	Mus musculus
SRR11425580_54752gene=Rasgef1b	non-Kozak	non-m6A	non-6nt	non-IRES	Mus musculus
SRR11425580_54869gene=Hbs1l	non-Kozak	m6A	non-6nt	IRES	Mus musculus
SRR11425580_54925gene=Snap91	non-Kozak	m6A	non-6nt	IRES	Mus musculus
SRR11425580_55174gene=Egfem1	non-Kozak	non-m6A	non-6nt	IRES	Mus musculus
SRR11425580_55511gene=Mcmbp	non-Kozak	m6A	non-6nt	IRES	Mus musculus
SRR11425580_55515gene=Aass	non-Kozak	m6A	non-6nt	non-IRES	Mus musculus
SRR11425580_55647gene=Dnajc7	non-Kozak	m6A	non-6nt	IRES	Mus musculus
SRR11425580_55862gene=Ppp1r21	non-Kozak	m6A	non-6nt	non-IRES	Mus musculus
SRR11425580_56021gene=Zbtb44	non-Kozak	m6A	non-6nt	IRES	Mus musculus
SRR11425580_56304gene=Plaa	non-Kozak	m6A	non-6nt	IRES	Mus musculus
SRR11425580_56625gene=Ddx10	non-Kozak	non-m6A	non-6nt	IRES	Mus musculus
SRR11425580_5667gene=Arpp21	non-Kozak	m6A	non-6nt	non-IRES	Mus musculus
SRR11425580_57202gene=Gmcl1	non-Kozak	m6A	non-6nt	IRES	Mus musculus
SRR11425580_57204gene=Gmcl1	non-Kozak	m6A	non-6nt	IRES	Mus musculus
SRR11425580_57336gene=Ccdc181	non-Kozak	m6A	non-6nt	IRES	Mus musculus
SRR11425580_57371gene=Zfp407	non-Kozak	m6A	non-6nt	IRES	Mus musculus
SRR11425580_57415gene=Atxn7	non-Kozak	m6A	non-6nt	IRES	Mus musculus
SRR11425580_57659gene=Peli1	non-Kozak	non-m6A	non-6nt	IRES	Mus musculus
SRR11425580_57789gene=Rbbp8	non-Kozak	m6A	non-6nt	IRES	Mus musculus
SRR11425580_57962gene=Cnot6	non-Kozak	non-m6A	non-6nt	IRES	Mus musculus
SRR11425580_58120gene=Pex5	non-Kozak	non-m6A	non-6nt	IRES	Mus musculus
SRR11425580_58154gene=Ndst4	non-Kozak	m6A	non-6nt	IRES	Mus musculus
SRR11425580_58187gene=Mrpl45	non-Kozak	m6A	non-6nt	IRES	Mus musculus
SRR11425580_58288gene=Tut4	non-Kozak	m6A	non-6nt	IRES	Mus musculus
SRR11425580_58317gene=Strn	non-Kozak	m6A	non-6nt	IRES	Mus musculus
SRR11425580_58538gene=Acot7	non-Kozak	m6A	non-6nt	IRES	Mus musculus
SRR11425580_58630gene=Sorcs3	non-Kozak	m6A	non-6nt	IRES	Mus musculus
SRR11425580_58822gene=Rrm2b	non-Kozak	m6A	non-6nt	IRES	Mus musculus
SRR11425580_58829gene=Phc3	non-Kozak	non-m6A	non-6nt	non-IRES	Mus musculus
SRR11425580_58861gene=Heca	non-Kozak	m6A	non-6nt	non-IRES	Mus musculus
SRR11425580_58894gene=E130308A19Rik	non-Kozak	m6A	non-6nt	IRES	Mus musculus
SRR11425580_59294gene=Kif16b	non-Kozak	non-m6A	non-6nt	non-IRES	Mus musculus
SRR11425580_59359gene=Chuk	non-Kozak	non-m6A	non-6nt	IRES	Mus musculus
SRR11425580_59377gene=Fbxw7	non-Kozak	non-m6A	non-6nt	IRES	Mus musculus
SRR11425580_59437gene=Efl1	non-Kozak	m6A	non-6nt	non-IRES	Mus musculus
SRR11425580_59491gene=Limch1	non-Kozak	m6A	non-6nt	IRES	Mus musculus
SRR11425580_59499gene=Zfp418	non-Kozak	m6A	non-6nt	IRES	Mus musculus
SRR11425580_59596gene=Zfr	non-Kozak	m6A	non-6nt	IRES	Mus musculus
SRR11425580_59822gene=Hdac9	non-Kozak	m6A	non-6nt	non-IRES	Mus musculus
SRR11425580_60010gene=Kcmf1	non-Kozak	non-m6A	non-6nt	IRES	Mus musculus
SRR11425580_60051gene=Lta4h	non-Kozak	non-m6A	non-6nt	IRES	Mus musculus
SRR11425580_60061gene=Mcm9	non-Kozak	m6A	non-6nt	IRES	Mus musculus
SRR11425580_60115gene=Trim24	non-Kozak	non-m6A	non-6nt	IRES	Mus musculus
SRR11425580_60125gene=Map3k2	non-Kozak	non-m6A	non-6nt	IRES	Mus musculus
SRR11425580_60145gene=Erdr1	non-Kozak	non-m6A	non-6nt	non-IRES	Mus musculus
SRR11425580_60176gene=Asb6	non-Kozak	non-m6A	non-6nt	IRES	Mus musculus
SRR11425580_60364gene=Smyd4	non-Kozak	non-m6A	non-6nt	non-IRES	Mus musculus
SRR11425580_60412gene=Flvcr1	non-Kozak	m6A	non-6nt	IRES	Mus musculus
SRR11425580_60600gene=Clint1	non-Kozak	non-m6A	non-6nt	non-IRES	Mus musculus
SRR11425580_60976gene=Gm29681	non-Kozak	m6A	non-6nt	non-IRES	Mus musculus
SRR11425580_61038gene=Tsga10	non-Kozak	m6A	non-6nt	IRES	Mus musculus
SRR11425580_61242gene=Adss	non-Kozak	non-m6A	non-6nt	IRES	Mus musculus
SRR11425580_61304gene=Cplane1	non-Kozak	m6A	non-6nt	IRES	Mus musculus
SRR11425580_61362gene=Ddb1	non-Kozak	m6A	non-6nt	IRES	Mus musculus
SRR11425580_61484gene=Hnrnpk	non-Kozak	non-m6A	non-6nt	IRES	Mus musculus
SRR11425580_61564gene=Sel1l	non-Kozak	m6A	non-6nt	IRES	Mus musculus
SRR11425580_61584gene=Retreg1	non-Kozak	m6A	non-6nt	IRES	Mus musculus
SRR11425580_61909gene=U2surp	non-Kozak	m6A	non-6nt	IRES	Mus musculus
SRR11425580_62135gene=Trerf1	non-Kozak	m6A	non-6nt	IRES	Mus musculus
SRR11425580_62233gene=Erdr1	non-Kozak	m6A	non-6nt	IRES	Mus musculus
SRR11425580_6226gene=Myt1l	non-Kozak	non-m6A	non-6nt	IRES	Mus musculus
SRR11425580_62318gene=Nck1	non-Kozak	m6A	non-6nt	non-IRES	Mus musculus
SRR11425580_62322gene=Bok	non-Kozak	m6A	non-6nt	IRES	Mus musculus
SRR11425580_62343gene=Camta2	non-Kozak	m6A	non-6nt	IRES	Mus musculus
SRR11425580_62434gene=Leo1	non-Kozak	m6A	non-6nt	non-IRES	Mus musculus
SRR11425580_62521gene=Abraxas1	non-Kozak	m6A	non-6nt	IRES	Mus musculus
SRR11425580_62626gene=Tdrd3	non-Kozak	non-m6A	non-6nt	IRES	Mus musculus
SRR11425580_62627gene=Tdrd3	non-Kozak	non-m6A	non-6nt	IRES	Mus musculus
SRR11425580_62794gene=Vezf1	non-Kozak	m6A	non-6nt	non-IRES	Mus musculus
SRR11425580_63399gene=S100pbp	non-Kozak	m6A	non-6nt	IRES	Mus musculus
SRR11425580_63456gene=Tcea1	non-Kozak	m6A	non-6nt	IRES	Mus musculus
SRR11425580_63535gene=Eprs	non-Kozak	non-m6A	non-6nt	IRES	Mus musculus
SRR11425580_63538gene=Nipsnap2	non-Kozak	non-m6A	non-6nt	non-IRES	Mus musculus
SRR11425580_63569gene=Atr	non-Kozak	m6A	non-6nt	IRES	Mus musculus
SRR11425580_63606gene=Sdhc	non-Kozak	m6A	non-6nt	non-IRES	Mus musculus
SRR11425580_63866gene=Dhx32	non-Kozak	non-m6A	non-6nt	IRES	Mus musculus
SRR11425580_64255gene=Rgs7	non-Kozak	non-m6A	non-6nt	IRES	Mus musculus
SRR11425580_64317gene=Ndufa10	non-Kozak	non-m6A	non-6nt	IRES	Mus musculus
SRR11425580_64324gene=Sltm	non-Kozak	m6A	non-6nt	IRES	Mus musculus
SRR11425580_6443gene=Acaca	non-Kozak	non-m6A	non-6nt	IRES	Mus musculus
SRR11425580_64642gene=Rras2	non-Kozak	m6A	non-6nt	non-IRES	Mus musculus
SRR11425580_64766gene=Lamp2	non-Kozak	m6A	non-6nt	IRES	Mus musculus
SRR11425580_64919gene=Nfkb1	non-Kozak	non-m6A	non-6nt	IRES	Mus musculus
SRR11425580_65201gene=D130043K22Rik	non-Kozak	m6A	non-6nt	IRES	Mus musculus
SRR11425580_65255gene=Phtf2	non-Kozak	m6A	non-6nt	IRES	Mus musculus
SRR11425580_65571gene=Tmem161b	non-Kozak	non-m6A	non-6nt	IRES	Mus musculus
SRR11425580_65572gene=Tmem161b	non-Kozak	non-m6A	non-6nt	IRES	Mus musculus
SRR11425580_65890gene=Hps3	non-Kozak	m6A	non-6nt	IRES	Mus musculus
SRR11425580_65892gene=Hps3	non-Kozak	non-m6A	non-6nt	IRES	Mus musculus
SRR11425580_66067gene=Lrrc57	non-Kozak	m6A	non-6nt	IRES	Mus musculus
SRR11425580_66141gene=Nab1	non-Kozak	m6A	non-6nt	non-IRES	Mus musculus
SRR11425580_66219gene=Kdm3a	non-Kozak	m6A	non-6nt	IRES	Mus musculus
SRR11425580_66333gene=Zfp53	non-Kozak	m6A	non-6nt	IRES	Mus musculus
SRR11425580_66600gene=Arnt	non-Kozak	non-m6A	non-6nt	IRES	Mus musculus
SRR11425580_66740gene=Dlgap1	non-Kozak	m6A	non-6nt	IRES	Mus musculus
SRR11425580_66952gene=Atad1	non-Kozak	m6A	non-6nt	IRES	Mus musculus
SRR11425580_66981gene=Gab3	non-Kozak	m6A	non-6nt	IRES	Mus musculus
SRR11425580_67031gene=Copb1	non-Kozak	non-m6A	non-6nt	IRES	Mus musculus
SRR11425580_67065gene=Gabpb1	non-Kozak	m6A	non-6nt	IRES	Mus musculus
SRR11425580_67254gene=Ppp2r2d	non-Kozak	m6A	non-6nt	IRES	Mus musculus
SRR11425580_67715gene=Ipp	non-Kozak	m6A	non-6nt	IRES	Mus musculus
SRR11425580_67958gene=Aff1	non-Kozak	m6A	non-6nt	non-IRES	Mus musculus
SRR11425580_67970gene=Mical3	non-Kozak	m6A	non-6nt	IRES	Mus musculus
SRR11425580_6830gene=Atp1b1	non-Kozak	non-m6A	non-6nt	IRES	Mus musculus
SRR11425580_68941gene=Fam193a	non-Kozak	m6A	non-6nt	IRES	Mus musculus
SRR11425580_69044gene=Ssr3	non-Kozak	m6A	non-6nt	IRES	Mus musculus
SRR11425580_69278gene=Ocln	non-Kozak	non-m6A	non-6nt	non-IRES	Mus musculus
SRR11425580_69370gene=Kiz	non-Kozak	m6A	non-6nt	IRES	Mus musculus
SRR11425580_69419gene=Gramd1b	non-Kozak	non-m6A	non-6nt	non-IRES	Mus musculus
SRR11425580_69456gene=Lrpap1	non-Kozak	non-m6A	non-6nt	IRES	Mus musculus
SRR11425580_69695gene=Stradb	non-Kozak	non-m6A	non-6nt	IRES	Mus musculus
SRR11425580_69710gene=Pwwp2a	non-Kozak	m6A	non-6nt	IRES	Mus musculus
SRR11425580_69748gene=Cyb5d2	non-Kozak	m6A	non-6nt	IRES	Mus musculus
SRR11425580_69751gene=Bag1	non-Kozak	non-m6A	non-6nt	IRES	Mus musculus
SRR11425580_69820gene=Gpi1	non-Kozak	non-m6A	non-6nt	IRES	Mus musculus
SRR11425580_69887gene=Zfp385b	non-Kozak	non-m6A	non-6nt	non-IRES	Mus musculus
SRR11425580_69888gene=Zfp385b	non-Kozak	non-m6A	non-6nt	IRES	Mus musculus
SRR11425580_69943gene=Nol8	non-Kozak	m6A	non-6nt	IRES	Mus musculus
SRR11425580_70000gene=Klhdc1	non-Kozak	non-m6A	non-6nt	IRES	Mus musculus
SRR11425580_70007gene=Mpp6	non-Kozak	non-m6A	non-6nt	IRES	Mus musculus
SRR11425580_70014gene=Aopep	non-Kozak	non-m6A	non-6nt	IRES	Mus musculus
SRR11425580_70069gene=Brwd3	non-Kozak	m6A	non-6nt	IRES	Mus musculus
SRR11425580_70120gene=Ccne2	non-Kozak	non-m6A	non-6nt	IRES	Mus musculus
SRR11425580_70138gene=Abcg2	non-Kozak	m6A	non-6nt	IRES	Mus musculus
SRR11425580_70176gene=Cyp7b1	non-Kozak	non-m6A	non-6nt	IRES	Mus musculus
SRR11425580_70182gene=Tdp1	non-Kozak	m6A	non-6nt	IRES	Mus musculus
SRR11425580_70758gene=Cdc14b	non-Kozak	non-m6A	non-6nt	IRES	Mus musculus
SRR11425580_70760gene=Cdc14b	non-Kozak	m6A	non-6nt	IRES	Mus musculus
SRR11425580_71074gene=Syngr1	non-Kozak	m6A	non-6nt	non-IRES	Mus musculus
SRR11425580_71098gene=Ing1	non-Kozak	m6A	non-6nt	IRES	Mus musculus
SRR11425580_71138gene=Tango6	non-Kozak	m6A	non-6nt	IRES	Mus musculus
SRR11425580_71256gene=Abhd5	non-Kozak	m6A	non-6nt	IRES	Mus musculus
SRR11425580_71349gene=Erap1	non-Kozak	m6A	non-6nt	IRES	Mus musculus
SRR11425580_71370gene=Dop1a	non-Kozak	m6A	non-6nt	IRES	Mus musculus
SRR11425580_71417gene=Pitrm1	non-Kozak	non-m6A	non-6nt	IRES	Mus musculus
SRR11425580_71565gene=Zscan21	non-Kozak	m6A	non-6nt	IRES	Mus musculus
SRR11425580_71631gene=Slc33a1	non-Kozak	non-m6A	non-6nt	IRES	Mus musculus
SRR11425580_71660gene=Cep95	non-Kozak	m6A	non-6nt	IRES	Mus musculus
SRR11425580_71687gene=Rcan2	non-Kozak	m6A	non-6nt	IRES	Mus musculus
SRR11425580_71704gene=Slc44a2	non-Kozak	non-m6A	non-6nt	non-IRES	Mus musculus
SRR11425580_71730gene=B230303A05Rik	non-Kozak	non-m6A	non-6nt	IRES	Mus musculus
SRR11425580_71877gene=Smap2	non-Kozak	m6A	non-6nt	IRES	Mus musculus
SRR11425580_71958gene=Cerkl	non-Kozak	m6A	non-6nt	IRES	Mus musculus
SRR11425580_71966gene=Lca5	non-Kozak	m6A	non-6nt	IRES	Mus musculus
SRR11425580_71997gene=Gm33228	non-Kozak	non-m6A	non-6nt	IRES	Mus musculus
SRR11425580_72099gene=Dnmbp	non-Kozak	m6A	non-6nt	non-IRES	Mus musculus
SRR11425580_72197gene=Herc1	non-Kozak	non-m6A	non-6nt	IRES	Mus musculus
SRR11425580_72302gene=Rnf111	non-Kozak	m6A	non-6nt	non-IRES	Mus musculus
SRR11425580_72325gene=Agfg1	non-Kozak	non-m6A	non-6nt	IRES	Mus musculus
SRR11425580_72502gene=Sec14l1	non-Kozak	m6A	non-6nt	non-IRES	Mus musculus
SRR11425580_72611gene=Mbtps2	non-Kozak	non-m6A	non-6nt	IRES	Mus musculus
SRR11425580_72631gene=Zbtb10	non-Kozak	m6A	non-6nt	IRES	Mus musculus
SRR11425580_72668gene=Pter	non-Kozak	non-m6A	non-6nt	IRES	Mus musculus
SRR11425580_72688gene=Mef2c	non-Kozak	non-m6A	non-6nt	IRES	Mus musculus
SRR11425580_72780gene=Zfp105	non-Kozak	m6A	non-6nt	non-IRES	Mus musculus
SRR11425580_72924gene=Ccny	non-Kozak	m6A	non-6nt	IRES	Mus musculus
SRR11425580_72935gene=Nufip1	non-Kozak	m6A	non-6nt	non-IRES	Mus musculus
SRR11425580_72983gene=Kcnk13	non-Kozak	non-m6A	non-6nt	non-IRES	Mus musculus
SRR11425580_73040gene=Commd9	non-Kozak	m6A	non-6nt	non-IRES	Mus musculus
SRR11425580_73235gene=Zfp609	non-Kozak	m6A	non-6nt	non-IRES	Mus musculus
SRR11425580_73256gene=Adgrl2	non-Kozak	non-m6A	non-6nt	IRES	Mus musculus
SRR11425580_73309gene=Map2k5	non-Kozak	m6A	non-6nt	IRES	Mus musculus
SRR11425580_73330gene=Zfp839	non-Kozak	m6A	non-6nt	non-IRES	Mus musculus
SRR11425580_73370gene=Phf12	non-Kozak	non-m6A	non-6nt	non-IRES	Mus musculus
SRR11425580_73385gene=Iars	non-Kozak	m6A	non-6nt	IRES	Mus musculus
SRR11425580_73741gene=Hnrnpll	non-Kozak	m6A	non-6nt	non-IRES	Mus musculus
SRR11425580_74013gene=Wdr11	non-Kozak	m6A	non-6nt	IRES	Mus musculus
SRR11425580_74062gene=Smad1	non-Kozak	m6A	non-6nt	non-IRES	Mus musculus
SRR11425580_74177gene=Abhd17b	non-Kozak	m6A	non-6nt	IRES	Mus musculus
SRR11425580_74333gene=Thumpd1	non-Kozak	non-m6A	non-6nt	IRES	Mus musculus
SRR11425580_74468gene=Thada	non-Kozak	non-m6A	non-6nt	IRES	Mus musculus
SRR11425580_74746gene=Coch	non-Kozak	m6A	non-6nt	IRES	Mus musculus
SRR11425580_75043gene=Zbtb10	non-Kozak	m6A	non-6nt	non-IRES	Mus musculus
SRR11425580_75056gene=Marchf6	non-Kozak	m6A	non-6nt	IRES	Mus musculus
SRR11425580_7513gene=Btbd9	non-Kozak	non-m6A	non-6nt	non-IRES	Mus musculus
SRR11425580_75189gene=Bsn	non-Kozak	m6A	non-6nt	IRES	Mus musculus
SRR11425580_75276gene=Pum3	non-Kozak	m6A	non-6nt	IRES	Mus musculus
SRR11425580_75611gene=Oaz1	non-Kozak	m6A	non-6nt	IRES	Mus musculus
SRR11425580_75626gene=Kdm6a	non-Kozak	m6A	non-6nt	IRES	Mus musculus
SRR11425580_75730gene=Crlf3	non-Kozak	m6A	non-6nt	IRES	Mus musculus
SRR11425580_75965gene=Ubp1	non-Kozak	non-m6A	non-6nt	non-IRES	Mus musculus
SRR11425580_76167gene=Setd3	non-Kozak	m6A	non-6nt	IRES	Mus musculus
SRR11425580_76319gene=Gtf2h2	non-Kozak	non-m6A	non-6nt	IRES	Mus musculus
SRR11425580_76481gene=Eefsec	non-Kozak	m6A	non-6nt	non-IRES	Mus musculus
SRR11425580_76568gene=Hmgb1	non-Kozak	m6A	non-6nt	IRES	Mus musculus
SRR11425580_76611gene=2210408I21Rik	non-Kozak	non-m6A	non-6nt	IRES	Mus musculus
SRR11425580_76664gene=Grm7	non-Kozak	non-m6A	non-6nt	IRES	Mus musculus
SRR11425580_76777gene=Ssbp3	non-Kozak	non-m6A	non-6nt	IRES	Mus musculus
SRR11425580_77028gene=Drp2	non-Kozak	non-m6A	non-6nt	IRES	Mus musculus
SRR11425580_77041gene=Sass6	non-Kozak	non-m6A	non-6nt	IRES	Mus musculus
SRR11425580_77134gene=Slc35b4	non-Kozak	m6A	non-6nt	IRES	Mus musculus
SRR11425580_77177gene=Dhx40	non-Kozak	non-m6A	non-6nt	IRES	Mus musculus
SRR11425580_77474gene=Kcnip4	non-Kozak	non-m6A	non-6nt	IRES	Mus musculus
SRR11425580_77650gene=Aig1	non-Kozak	non-m6A	non-6nt	IRES	Mus musculus
SRR11425580_77787gene=Pus1	non-Kozak	non-m6A	non-6nt	non-IRES	Mus musculus
SRR11425580_77898gene=Nagpa	non-Kozak	non-m6A	non-6nt	non-IRES	Mus musculus
SRR11425580_77920gene=Fnta	non-Kozak	m6A	non-6nt	IRES	Mus musculus
SRR11425580_77963gene=Arhgap12	non-Kozak	m6A	non-6nt	non-IRES	Mus musculus
SRR11425580_78142gene=Pspc1	non-Kozak	non-m6A	non-6nt	IRES	Mus musculus
SRR11425580_78178gene=Babam2	non-Kozak	non-m6A	non-6nt	IRES	Mus musculus
SRR11425580_78247gene=Eif4g3	non-Kozak	non-m6A	non-6nt	IRES	Mus musculus
SRR11425580_78251gene=Ppm1d	non-Kozak	m6A	non-6nt	IRES	Mus musculus
SRR11425580_78313gene=Parp6	non-Kozak	m6A	non-6nt	IRES	Mus musculus
SRR11425580_78329gene=Zfp326	non-Kozak	non-m6A	non-6nt	IRES	Mus musculus
SRR11425580_78412gene=Reck	non-Kozak	m6A	non-6nt	IRES	Mus musculus
SRR11425580_78527gene=Tiparp	non-Kozak	m6A	non-6nt	IRES	Mus musculus
SRR11425580_78613gene=Rbm6	non-Kozak	m6A	non-6nt	IRES	Mus musculus
SRR11425580_78616gene=Zfp142	non-Kozak	non-m6A	non-6nt	IRES	Mus musculus
SRR11425580_78671gene=Ankrd26	non-Kozak	m6A	non-6nt	IRES	Mus musculus
SRR11425580_78696gene=Rp2	non-Kozak	m6A	non-6nt	IRES	Mus musculus
SRR11425580_78780gene=Chchd3	non-Kozak	m6A	non-6nt	IRES	Mus musculus
SRR11425580_78966gene=Rpl9	non-Kozak	m6A	non-6nt	IRES	Mus musculus
SRR11425580_78969gene=Arfip1	non-Kozak	non-m6A	non-6nt	IRES	Mus musculus
SRR11425580_7908gene=Iqce	non-Kozak	non-m6A	non-6nt	non-IRES	Mus musculus
SRR11425580_79162gene=Ddx31	non-Kozak	non-m6A	non-6nt	IRES	Mus musculus
SRR11425580_79194gene=Robo2	non-Kozak	non-m6A	non-6nt	IRES	Mus musculus
SRR11425580_79374gene=Gm35223	non-Kozak	non-m6A	non-6nt	IRES	Mus musculus
SRR11425580_79393gene=Gspt1	non-Kozak	m6A	non-6nt	IRES	Mus musculus
SRR11425580_79403gene=AW554918	non-Kozak	non-m6A	non-6nt	IRES	Mus musculus
SRR11425580_79457gene=Ipmk	non-Kozak	non-m6A	non-6nt	non-IRES	Mus musculus
SRR11425580_79518gene=Acot9	non-Kozak	m6A	non-6nt	IRES	Mus musculus
SRR11425580_79593gene=Tpm1	non-Kozak	non-m6A	non-6nt	IRES	Mus musculus
SRR11425580_79614gene=Emc2	non-Kozak	m6A	non-6nt	non-IRES	Mus musculus
SRR11425580_79658gene=Ccnf	non-Kozak	non-m6A	non-6nt	IRES	Mus musculus
SRR11425580_80056gene=Pbrm1	non-Kozak	m6A	non-6nt	IRES	Mus musculus
SRR11425580_80546gene=Ptgr2	non-Kozak	non-m6A	non-6nt	IRES	Mus musculus
SRR11425580_80928gene=Dhrs7b	non-Kozak	non-m6A	non-6nt	non-IRES	Mus musculus
SRR11425580_81188gene=Gm7335	non-Kozak	non-m6A	non-6nt	IRES	Mus musculus
SRR11425580_81407gene=Haus6	non-Kozak	non-m6A	non-6nt	IRES	Mus musculus
SRR11425580_81467gene=Mtx2	non-Kozak	m6A	non-6nt	IRES	Mus musculus
SRR11425580_81758gene=Rell1	non-Kozak	m6A	non-6nt	IRES	Mus musculus
SRR11425580_81867gene=Pcnx2	non-Kozak	m6A	non-6nt	IRES	Mus musculus
SRR11425580_81939gene=Zdhhc14	non-Kozak	non-m6A	non-6nt	IRES	Mus musculus
SRR11425580_81949gene=Fut8	non-Kozak	non-m6A	non-6nt	IRES	Mus musculus
SRR11425580_82139gene=Dusp16	non-Kozak	m6A	non-6nt	IRES	Mus musculus
SRR11425580_82178gene=Phf6	non-Kozak	m6A	non-6nt	IRES	Mus musculus
SRR11425580_82415gene=Rps26	non-Kozak	non-m6A	non-6nt	IRES	Mus musculus
SRR11425580_82488gene=2810408B13Rik	non-Kozak	non-m6A	non-6nt	IRES	Mus musculus
SRR11425580_82574gene=Psmd14	non-Kozak	non-m6A	non-6nt	IRES	Mus musculus
SRR11425580_82609gene=Rundc3b	non-Kozak	non-m6A	non-6nt	IRES	Mus musculus
SRR11425580_82662gene=Psmc6	non-Kozak	m6A	non-6nt	IRES	Mus musculus
SRR11425580_82869gene=Tcerg1	non-Kozak	non-m6A	non-6nt	non-IRES	Mus musculus
SRR11425580_82905gene=Ube2cbp	non-Kozak	m6A	non-6nt	IRES	Mus musculus
SRR11425580_82953gene=Abcd3	non-Kozak	non-m6A	non-6nt	IRES	Mus musculus
SRR11425580_82955gene=Abcd3	non-Kozak	non-m6A	non-6nt	IRES	Mus musculus
SRR11425580_82998gene=Ccdc148	non-Kozak	non-m6A	non-6nt	IRES	Mus musculus
SRR11425580_83040gene=Rabgap1	non-Kozak	m6A	non-6nt	IRES	Mus musculus
SRR11425580_8313gene=Wnk3	non-Kozak	m6A	non-6nt	non-IRES	Mus musculus
SRR11425580_83243gene=Cdc25a	non-Kozak	non-m6A	non-6nt	IRES	Mus musculus
SRR11425580_83315gene=Med14	non-Kozak	non-m6A	non-6nt	IRES	Mus musculus
SRR11425580_83610gene=Pls3	non-Kozak	non-m6A	non-6nt	IRES	Mus musculus
SRR11425580_83615gene=Trrap	non-Kozak	non-m6A	non-6nt	IRES	Mus musculus
SRR11425580_83623gene=Brcc3	non-Kozak	non-m6A	non-6nt	IRES	Mus musculus
SRR11425580_83679gene=Gtf3c1	non-Kozak	non-m6A	non-6nt	non-IRES	Mus musculus
SRR11425580_83721gene=Acbd5	non-Kozak	non-m6A	non-6nt	IRES	Mus musculus
SRR11425580_83761gene=Cept1	non-Kozak	m6A	non-6nt	IRES	Mus musculus
SRR11425580_83818gene=Cyc1	non-Kozak	m6A	non-6nt	non-IRES	Mus musculus
SRR11425580_84001gene=Rad18	non-Kozak	non-m6A	non-6nt	IRES	Mus musculus
SRR11425580_84106gene=Arf1	non-Kozak	non-m6A	non-6nt	IRES	Mus musculus
SRR11425580_84305gene=Gps2	non-Kozak	m6A	non-6nt	non-IRES	Mus musculus
SRR11425580_84318gene=intergenic	non-Kozak	m6A	non-6nt	non-IRES	Mus musculus
SRR11425580_84386gene=Shq1	non-Kozak	m6A	non-6nt	IRES	Mus musculus
SRR11425580_84394gene=9530077C05Rik	non-Kozak	m6A	non-6nt	IRES	Mus musculus
SRR11425580_84686gene=Usp42	non-Kozak	non-m6A	non-6nt	IRES	Mus musculus
SRR11425580_84813gene=Fndc3b	non-Kozak	non-m6A	non-6nt	IRES	Mus musculus
SRR11425580_84814gene=Fndc3b	non-Kozak	non-m6A	non-6nt	non-IRES	Mus musculus
SRR11425580_84937gene=Nkain2	non-Kozak	non-m6A	non-6nt	IRES	Mus musculus
SRR11425580_84940gene=Hmgcll1	non-Kozak	non-m6A	non-6nt	IRES	Mus musculus
SRR11425580_85053gene=Brwd3	non-Kozak	m6A	non-6nt	IRES	Mus musculus
SRR11425580_85235gene=Wwox	non-Kozak	m6A	non-6nt	non-IRES	Mus musculus
SRR11425580_85315gene=Mtrf1	non-Kozak	non-m6A	non-6nt	IRES	Mus musculus
SRR11425580_85343gene=Atp5a1	non-Kozak	m6A	non-6nt	IRES	Mus musculus
SRR11425580_85364gene=Kcnn2	non-Kozak	non-m6A	non-6nt	IRES	Mus musculus
SRR11425580_85423gene=Cdkal1	non-Kozak	m6A	non-6nt	non-IRES	Mus musculus
SRR11425580_85484gene=Itpr1	non-Kozak	m6A	non-6nt	IRES	Mus musculus
SRR11425580_85610gene=Slc35b3	non-Kozak	non-m6A	non-6nt	IRES	Mus musculus
SRR11425580_85711gene=Fbxo38	non-Kozak	m6A	non-6nt	IRES	Mus musculus
SRR11425580_8595gene=Slc9a7	non-Kozak	non-m6A	non-6nt	IRES	Mus musculus
SRR11425580_86066gene=Scfd1	non-Kozak	m6A	non-6nt	IRES	Mus musculus
SRR11425580_86072gene=Patl1	non-Kozak	non-m6A	non-6nt	non-IRES	Mus musculus
SRR11425580_86116gene=Zfp605	non-Kozak	non-m6A	non-6nt	IRES	Mus musculus
SRR11425580_86163gene=Hspa14	non-Kozak	non-m6A	non-6nt	IRES	Mus musculus
SRR11425580_86236gene=Kmt2a	non-Kozak	m6A	non-6nt	IRES	Mus musculus
SRR11425580_86254gene=Tmem68	non-Kozak	m6A	non-6nt	IRES	Mus musculus
SRR11425580_8628gene=Ndst1	non-Kozak	m6A	non-6nt	non-IRES	Mus musculus
SRR11425580_86323gene=Pianp	non-Kozak	m6A	non-6nt	IRES	Mus musculus
SRR11425580_86437gene=Amn1	non-Kozak	non-m6A	non-6nt	IRES	Mus musculus
SRR11425580_86449gene=Gm40228	non-Kozak	non-m6A	non-6nt	IRES	Mus musculus
SRR11425580_86574gene=Mllt10	non-Kozak	non-m6A	non-6nt	IRES	Mus musculus
SRR11425580_86630gene=Nudt13	non-Kozak	non-m6A	non-6nt	non-IRES	Mus musculus
SRR11425580_8665gene=Ppm1a	non-Kozak	m6A	non-6nt	IRES	Mus musculus
SRR11425580_86726gene=Tmed7	non-Kozak	m6A	non-6nt	IRES	Mus musculus
SRR11425580_86978gene=Nae1	non-Kozak	non-m6A	non-6nt	IRES	Mus musculus
SRR11425580_87123gene=Tmem184c	non-Kozak	m6A	non-6nt	IRES	Mus musculus
SRR11425580_87239gene=Aplp2	non-Kozak	non-m6A	non-6nt	IRES	Mus musculus
SRR11425580_87359gene=Ppme1	non-Kozak	m6A	non-6nt	IRES	Mus musculus
SRR11425580_87395gene=Runx1t1	non-Kozak	non-m6A	non-6nt	non-IRES	Mus musculus
SRR11425580_87541gene=Kif2a	non-Kozak	m6A	non-6nt	IRES	Mus musculus
SRR11425580_87593gene=Pibf1	non-Kozak	non-m6A	non-6nt	IRES	Mus musculus
SRR11425580_87636gene=Nup133	non-Kozak	m6A	non-6nt	IRES	Mus musculus
SRR11425580_87645gene=Rab3ip	non-Kozak	non-m6A	non-6nt	non-IRES	Mus musculus
SRR11425580_87763gene=Ctnna3	non-Kozak	non-m6A	non-6nt	non-IRES	Mus musculus
SRR11425580_87843gene=Foxj3	non-Kozak	m6A	non-6nt	IRES	Mus musculus
SRR11425580_87847gene=Uba3	non-Kozak	m6A	non-6nt	IRES	Mus musculus
SRR11425580_87946gene=Rhbdd1	non-Kozak	non-m6A	non-6nt	IRES	Mus musculus
SRR11425580_88063gene=Dctn6	non-Kozak	non-m6A	non-6nt	IRES	Mus musculus
SRR11425580_88064gene=Ptpra	non-Kozak	m6A	non-6nt	IRES	Mus musculus
SRR11425580_88144gene=Nfatc2	non-Kozak	m6A	non-6nt	non-IRES	Mus musculus
SRR11425580_88398gene=Pank1	non-Kozak	m6A	non-6nt	IRES	Mus musculus
SRR11425580_8841gene=Wdr20	non-Kozak	m6A	non-6nt	IRES	Mus musculus
SRR11425580_88434gene=Erlec1	non-Kozak	non-m6A	non-6nt	IRES	Mus musculus
SRR11425580_88627gene=Mob4	non-Kozak	non-m6A	non-6nt	IRES	Mus musculus
SRR11425580_89198gene=Sufu	non-Kozak	non-m6A	non-6nt	non-IRES	Mus musculus
SRR11425580_89267gene=Ddx52	non-Kozak	non-m6A	non-6nt	IRES	Mus musculus
SRR11425580_89414gene=Tmem209	non-Kozak	non-m6A	non-6nt	IRES	Mus musculus
SRR11425580_89667gene=Coq3	non-Kozak	non-m6A	non-6nt	IRES	Mus musculus
SRR11425580_89772gene=Lcorl	non-Kozak	m6A	non-6nt	IRES	Mus musculus
SRR11425580_89912gene=Lamp5	non-Kozak	non-m6A	non-6nt	IRES	Mus musculus
SRR11425580_89982gene=Atp5j2	non-Kozak	non-m6A	non-6nt	IRES	Mus musculus
SRR11425580_90147gene=Galc	non-Kozak	non-m6A	non-6nt	non-IRES	Mus musculus
SRR11425580_90291gene=Taf5	non-Kozak	m6A	non-6nt	non-IRES	Mus musculus
SRR11425580_90340gene=Napb	non-Kozak	m6A	non-6nt	IRES	Mus musculus
SRR11425580_90443gene=Kcnk10	non-Kozak	non-m6A	non-6nt	IRES	Mus musculus
SRR11425580_90472gene=Kif9	non-Kozak	m6A	non-6nt	non-IRES	Mus musculus
SRR11425580_90625gene=Psmd7	non-Kozak	non-m6A	non-6nt	IRES	Mus musculus
SRR11425580_90834gene=Arhgap12	non-Kozak	non-m6A	non-6nt	IRES	Mus musculus
SRR11425580_90866gene=Bckdhb	non-Kozak	non-m6A	non-6nt	IRES	Mus musculus
SRR11425580_91046gene=Shank3	non-Kozak	m6A	non-6nt	IRES	Mus musculus
SRR11425580_91396gene=9930021J03Rik	non-Kozak	m6A	non-6nt	IRES	Mus musculus
SRR11425580_91493gene=Kdm1a	non-Kozak	m6A	non-6nt	IRES	Mus musculus
SRR11425580_91560gene=Slc16a10	non-Kozak	m6A	non-6nt	non-IRES	Mus musculus
SRR11425580_91568gene=Naa16	non-Kozak	non-m6A	non-6nt	IRES	Mus musculus
SRR11425580_91570gene=Naa16	non-Kozak	m6A	non-6nt	non-IRES	Mus musculus
SRR11425580_91628gene=Gdpgp1	non-Kozak	non-m6A	non-6nt	IRES	Mus musculus
SRR11425580_91645gene=Foxj3	non-Kozak	non-m6A	non-6nt	non-IRES	Mus musculus
SRR11425580_91711gene=Pigx	non-Kozak	m6A	non-6nt	IRES	Mus musculus
SRR11425580_91755gene=Top3a	non-Kozak	m6A	non-6nt	non-IRES	Mus musculus
SRR11425580_91899gene=St3gal6	non-Kozak	non-m6A	non-6nt	IRES	Mus musculus
SRR11425580_92100gene=Yipf1	non-Kozak	non-m6A	non-6nt	IRES	Mus musculus
SRR11425580_92335gene=Tle1	non-Kozak	non-m6A	non-6nt	IRES	Mus musculus
SRR11425580_92745gene=Prkx	non-Kozak	m6A	non-6nt	non-IRES	Mus musculus
SRR11425580_92767gene=Gdi2	non-Kozak	non-m6A	non-6nt	IRES	Mus musculus
SRR11425580_92888gene=Clk3	non-Kozak	m6A	non-6nt	IRES	Mus musculus
SRR11425580_92909gene=Aasdhppt	non-Kozak	non-m6A	non-6nt	IRES	Mus musculus
SRR11425580_92970gene=Poln	non-Kozak	m6A	non-6nt	IRES	Mus musculus
SRR11425580_93123gene=Supt3	non-Kozak	non-m6A	non-6nt	non-IRES	Mus musculus
SRR11425580_93145gene=Tada2a	non-Kozak	m6A	non-6nt	IRES	Mus musculus
SRR11425580_93285gene=Septin8	non-Kozak	m6A	non-6nt	IRES	Mus musculus
SRR11425580_93361gene=Ndufaf6	non-Kozak	m6A	non-6nt	non-IRES	Mus musculus
SRR11425580_93782gene=Haus6	non-Kozak	m6A	non-6nt	IRES	Mus musculus
SRR11425580_94198gene=Obi1	non-Kozak	non-m6A	non-6nt	IRES	Mus musculus
SRR11425580_94371gene=Ccar1	non-Kozak	m6A	non-6nt	IRES	Mus musculus
SRR11425580_94416gene=Gbe1	non-Kozak	non-m6A	non-6nt	IRES	Mus musculus
SRR11425580_94455gene=Akt1	non-Kozak	non-m6A	non-6nt	non-IRES	Mus musculus
SRR11425580_94582gene=Nfib	non-Kozak	m6A	non-6nt	IRES	Mus musculus
SRR11425580_94681gene=Fam204a	non-Kozak	m6A	non-6nt	non-IRES	Mus musculus
SRR11425580_94786gene=Rpp30	non-Kozak	m6A	non-6nt	IRES	Mus musculus
SRR11425580_94971gene=Ndufab1	non-Kozak	m6A	non-6nt	IRES	Mus musculus
SRR11425580_94994gene=Mccc1	non-Kozak	m6A	non-6nt	IRES	Mus musculus
SRR11425580_95057gene=Hibadh	non-Kozak	m6A	non-6nt	non-IRES	Mus musculus
SRR11425580_95076gene=Kat6a	non-Kozak	m6A	non-6nt	IRES	Mus musculus
SRR11425580_95153gene=Fah	non-Kozak	non-m6A	non-6nt	IRES	Mus musculus
SRR11425580_95334gene=Enoph1	non-Kozak	non-m6A	non-6nt	non-IRES	Mus musculus
SRR11425580_95360gene=Apoo	non-Kozak	m6A	non-6nt	IRES	Mus musculus
SRR11425580_95469gene=Pcgf5	non-Kozak	non-m6A	non-6nt	IRES	Mus musculus
SRR11425580_95477gene=Lrrc28	non-Kozak	non-m6A	non-6nt	non-IRES	Mus musculus
SRR11425580_95618gene=Stip1	non-Kozak	m6A	non-6nt	IRES	Mus musculus
SRR11425580_95726gene=Ddx31	non-Kozak	m6A	non-6nt	IRES	Mus musculus
SRR11425580_95989gene=Coq10b	non-Kozak	non-m6A	non-6nt	IRES	Mus musculus
SRR11425580_96019gene=Ripk2	non-Kozak	non-m6A	non-6nt	IRES	Mus musculus
SRR11425580_96456gene=Smn1	non-Kozak	m6A	non-6nt	IRES	Mus musculus
SRR11425580_96519gene=Skp1	non-Kozak	m6A	non-6nt	non-IRES	Mus musculus
SRR11425580_96686gene=Wdhd1	non-Kozak	non-m6A	non-6nt	IRES	Mus musculus
SRR11425580_96706gene=Cwf19l1	non-Kozak	non-m6A	non-6nt	non-IRES	Mus musculus
SRR11425580_96727gene=Fchsd2	non-Kozak	non-m6A	non-6nt	IRES	Mus musculus
SRR11425580_97059gene=Trit1	non-Kozak	non-m6A	non-6nt	IRES	Mus musculus
SRR11425580_97371gene=Mbd2	non-Kozak	non-m6A	non-6nt	non-IRES	Mus musculus
SRR11425580_97453gene=Atp5j2	non-Kozak	non-m6A	non-6nt	IRES	Mus musculus
SRR11425580_9750gene=Mga	non-Kozak	m6A	non-6nt	IRES	Mus musculus
SRR11425580_97519gene=Rnf2	non-Kozak	non-m6A	non-6nt	non-IRES	Mus musculus
SRR11425580_97597gene=Sap130	non-Kozak	non-m6A	non-6nt	non-IRES	Mus musculus
SRR11425580_97671gene=intergenic	non-Kozak	m6A	non-6nt	non-IRES	Mus musculus
SRR11425580_97725gene=Gm20498	non-Kozak	non-m6A	non-6nt	IRES	Mus musculus
SRR11425580_97993gene=Zdhhc20	non-Kozak	non-m6A	non-6nt	IRES	Mus musculus
SRR11425580_98110gene=Patl1	non-Kozak	non-m6A	non-6nt	non-IRES	Mus musculus
SRR11425580_98419gene=Dcun1d1	non-Kozak	non-m6A	non-6nt	non-IRES	Mus musculus
SRR11425580_98544gene=Pigf	non-Kozak	m6A	non-6nt	IRES	Mus musculus
SRR11425580_98559gene=Arhgap12	non-Kozak	m6A	non-6nt	IRES	Mus musculus
SRR11425580_98584gene=Brd1	non-Kozak	m6A	non-6nt	IRES	Mus musculus
SRR11425580_98681gene=Mpzl1	non-Kozak	non-m6A	non-6nt	IRES	Mus musculus
SRR11425580_98697gene=B3galnt2	non-Kozak	m6A	non-6nt	IRES	Mus musculus
SRR11425580_99065gene=Atf1	non-Kozak	m6A	non-6nt	IRES	Mus musculus
SRR11425580_99144gene=Tiprl	non-Kozak	m6A	non-6nt	non-IRES	Mus musculus
SRR11425580_99821gene=Metap1d	non-Kozak	non-m6A	non-6nt	non-IRES	Mus musculus
SRR11425581_100064gene=Rsbn1	non-Kozak	m6A	non-6nt	IRES	Mus musculus
SRR11425581_100142gene=Mctp2	non-Kozak	m6A	non-6nt	IRES	Mus musculus
SRR11425581_100144gene=Septin9	non-Kozak	m6A	non-6nt	IRES	Mus musculus
SRR11425581_100250gene=Ralgps1	non-Kozak	m6A	non-6nt	IRES	Mus musculus
SRR11425581_100379gene=Nab1	non-Kozak	non-m6A	non-6nt	IRES	Mus musculus
SRR11425581_100448gene=Ephb2	non-Kozak	non-m6A	non-6nt	IRES	Mus musculus
SRR11425581_100457gene=Slc35a3	non-Kozak	m6A	non-6nt	IRES	Mus musculus
SRR11425581_100981gene=Arnt	non-Kozak	non-m6A	non-6nt	IRES	Mus musculus
SRR11425581_101092gene=Orc5	non-Kozak	m6A	non-6nt	IRES	Mus musculus
SRR11425581_101115gene=Polr3c	non-Kozak	m6A	non-6nt	non-IRES	Mus musculus
SRR11425581_101277gene=Ddx18	non-Kozak	non-m6A	non-6nt	IRES	Mus musculus
SRR11425581_101494gene=P2rx4	non-Kozak	m6A	non-6nt	IRES	Mus musculus
SRR11425581_101648gene=Gab3	non-Kozak	m6A	non-6nt	IRES	Mus musculus
SRR11425581_101810gene=Gm32576	non-Kozak	m6A	non-6nt	IRES	Mus musculus
SRR11425581_102453gene=Gm53065	non-Kozak	m6A	non-6nt	IRES	Mus musculus
SRR11425581_102652gene=Nsd3	non-Kozak	non-m6A	non-6nt	IRES	Mus musculus
SRR11425581_102658gene=Stau1	non-Kozak	non-m6A	non-6nt	IRES	Mus musculus
SRR11425581_102706gene=Smg5	non-Kozak	non-m6A	non-6nt	IRES	Mus musculus
SRR11425581_103450gene=Braf	non-Kozak	m6A	non-6nt	IRES	Mus musculus
SRR11425581_103735gene=Iqschfp	non-Kozak	non-m6A	non-6nt	IRES	Mus musculus
SRR11425581_103941gene=Mmgt2	non-Kozak	m6A	non-6nt	non-IRES	Mus musculus
SRR11425581_104160gene=Tlk2	non-Kozak	m6A	non-6nt	IRES	Mus musculus
SRR11425581_104499gene=Slc46a3	non-Kozak	non-m6A	non-6nt	non-IRES	Mus musculus
SRR11425581_104743gene=Kcnk13	non-Kozak	non-m6A	non-6nt	non-IRES	Mus musculus
SRR11425581_104914gene=Kiz	non-Kozak	m6A	non-6nt	IRES	Mus musculus
SRR11425581_105023gene=Hdlbp	non-Kozak	non-m6A	non-6nt	IRES	Mus musculus
SRR11425581_105102gene=Siah1a	non-Kozak	m6A	non-6nt	non-IRES	Mus musculus
SRR11425581_105151gene=Tmtc2	non-Kozak	m6A	non-6nt	IRES	Mus musculus
SRR11425581_105324gene=Pwwp2a	non-Kozak	m6A	non-6nt	non-IRES	Mus musculus
SRR11425581_105409gene=Lin7a	non-Kozak	m6A	non-6nt	non-IRES	Mus musculus
SRR11425581_105443gene=Hs2st1	non-Kozak	m6A	non-6nt	IRES	Mus musculus
SRR11425581_105635gene=Klhl15	non-Kozak	non-m6A	non-6nt	IRES	Mus musculus
SRR11425581_105717gene=Aopep	non-Kozak	m6A	non-6nt	IRES	Mus musculus
SRR11425581_105788gene=Zfp955a	non-Kozak	m6A	non-6nt	IRES	Mus musculus
SRR11425581_105921gene=Cyp7b1	non-Kozak	m6A	non-6nt	IRES	Mus musculus
SRR11425581_106046gene=Gga1	non-Kozak	non-m6A	non-6nt	IRES	Mus musculus
SRR11425581_106078gene=Vangl1	non-Kozak	m6A	non-6nt	IRES	Mus musculus
SRR11425581_106158gene=Mrps27	non-Kozak	m6A	non-6nt	IRES	Mus musculus
SRR11425581_106160gene=Ntn4	non-Kozak	non-m6A	non-6nt	non-IRES	Mus musculus
SRR11425581_106554gene=Wls	non-Kozak	m6A	non-6nt	non-IRES	Mus musculus
SRR11425581_106736gene=Aig1	non-Kozak	non-m6A	non-6nt	IRES	Mus musculus
SRR11425581_106737gene=Aig1	non-Kozak	non-m6A	non-6nt	IRES	Mus musculus
SRR11425581_107156gene=Ing1	non-Kozak	m6A	non-6nt	non-IRES	Mus musculus
SRR11425581_107687gene=Macir	non-Kozak	non-m6A	non-6nt	IRES	Mus musculus
SRR11425581_107825gene=Ccdc66	non-Kozak	non-m6A	non-6nt	IRES	Mus musculus
SRR11425581_108137gene=Huwe1	non-Kozak	non-m6A	non-6nt	IRES	Mus musculus
SRR11425581_108151gene=Calb1	non-Kozak	m6A	non-6nt	IRES	Mus musculus
SRR11425581_108179gene=Phf20l1	non-Kozak	non-m6A	non-6nt	IRES	Mus musculus
SRR11425581_108282gene=Gk5	non-Kozak	m6A	non-6nt	IRES	Mus musculus
SRR11425581_108308gene=Pigg	non-Kozak	m6A	non-6nt	IRES	Mus musculus
SRR11425581_108397gene=Wdr47	non-Kozak	non-m6A	non-6nt	IRES	Mus musculus
SRR11425581_108846gene=Rimklb	non-Kozak	m6A	non-6nt	non-IRES	Mus musculus
SRR11425581_108859gene=Tmod3	non-Kozak	m6A	non-6nt	IRES	Mus musculus
SRR11425581_109025gene=Sypl	non-Kozak	m6A	non-6nt	IRES	Mus musculus
SRR11425581_109464gene=Rnf121	non-Kozak	m6A	non-6nt	IRES	Mus musculus
SRR11425581_109682gene=Washc4	non-Kozak	non-m6A	non-6nt	IRES	Mus musculus
SRR11425581_109853gene=Alkbh1	non-Kozak	non-m6A	non-6nt	IRES	Mus musculus
SRR11425581_110000gene=Commd9	non-Kozak	non-m6A	non-6nt	non-IRES	Mus musculus
SRR11425581_110243gene=Plp1	non-Kozak	non-m6A	non-6nt	IRES	Mus musculus
SRR11425581_110341gene=Kat6b	non-Kozak	m6A	non-6nt	IRES	Mus musculus
SRR11425581_11135gene=Egfem1	non-Kozak	m6A	non-6nt	non-IRES	Mus musculus
SRR11425581_111804gene=Agmo	non-Kozak	m6A	non-6nt	IRES	Mus musculus
SRR11425581_111946gene=Gmcl1	non-Kozak	non-m6A	non-6nt	IRES	Mus musculus
SRR11425581_112029gene=Foxo1	non-Kozak	non-m6A	non-6nt	IRES	Mus musculus
SRR11425581_112049gene=Mdga2	non-Kozak	non-m6A	non-6nt	IRES	Mus musculus
SRR11425581_112152gene=Prim2	non-Kozak	non-m6A	non-6nt	non-IRES	Mus musculus
SRR11425581_1123gene=Zfp148	non-Kozak	m6A	non-6nt	IRES	Mus musculus
SRR11425581_112727gene=Mark2	non-Kozak	non-m6A	non-6nt	IRES	Mus musculus
SRR11425581_112966gene=Uap1l1	non-Kozak	m6A	non-6nt	non-IRES	Mus musculus
SRR11425581_113385gene=Zfp410	non-Kozak	non-m6A	non-6nt	IRES	Mus musculus
SRR11425581_113666gene=Crlf3	non-Kozak	m6A	non-6nt	IRES	Mus musculus
SRR11425581_113684gene=Eefsec	non-Kozak	non-m6A	non-6nt	non-IRES	Mus musculus
SRR11425581_113926gene=Hnrnph3	non-Kozak	non-m6A	non-6nt	IRES	Mus musculus
SRR11425581_11398gene=Lsamp	non-Kozak	m6A	non-6nt	IRES	Mus musculus
SRR11425581_113gene=Napepld	non-Kozak	non-m6A	non-6nt	IRES	Mus musculus
SRR11425581_114322gene=Med15	non-Kozak	m6A	non-6nt	IRES	Mus musculus
SRR11425581_114652gene=Speg	non-Kozak	non-m6A	non-6nt	IRES	Mus musculus
SRR11425581_114788gene=Ntrk2	non-Kozak	non-m6A	non-6nt	IRES	Mus musculus
SRR11425581_11502gene=Pigb	non-Kozak	m6A	non-6nt	IRES	Mus musculus
SRR11425581_115089gene=Syt11	non-Kozak	m6A	non-6nt	IRES	Mus musculus
SRR11425581_115090gene=Syt11	non-Kozak	m6A	non-6nt	IRES	Mus musculus
SRR11425581_115199gene=Pcnx2	non-Kozak	m6A	non-6nt	IRES	Mus musculus
SRR11425581_115312gene=Grm7	non-Kozak	non-m6A	non-6nt	IRES	Mus musculus
SRR11425581_115410gene=Kcnma1	non-Kozak	non-m6A	non-6nt	IRES	Mus musculus
SRR11425581_115439gene=C9orf72	non-Kozak	m6A	non-6nt	IRES	Mus musculus
SRR11425581_115655gene=Adgrb3	non-Kozak	non-m6A	non-6nt	IRES	Mus musculus
SRR11425581_116039gene=Kmt2a	non-Kozak	m6A	non-6nt	IRES	Mus musculus
SRR11425581_11608gene=Rbfox1	non-Kozak	m6A	non-6nt	IRES	Mus musculus
SRR11425581_116230gene=Txlng	non-Kozak	m6A	non-6nt	IRES	Mus musculus
SRR11425581_116304gene=Ccdc171	non-Kozak	non-m6A	non-6nt	IRES	Mus musculus
SRR11425581_116370gene=Nrxn1	non-Kozak	m6A	non-6nt	IRES	Mus musculus
SRR11425581_116539gene=Mdh1	non-Kozak	m6A	non-6nt	IRES	Mus musculus
SRR11425581_116789gene=Mbtps2	non-Kozak	non-m6A	non-6nt	IRES	Mus musculus
SRR11425581_117189gene=Ankrd44	non-Kozak	m6A	non-6nt	IRES	Mus musculus
SRR11425581_117221gene=Swt1	non-Kozak	m6A	non-6nt	IRES	Mus musculus
SRR11425581_117305gene=Slc38a2	non-Kozak	m6A	non-6nt	IRES	Mus musculus
SRR11425581_117346gene=Tiparp	non-Kozak	non-m6A	non-6nt	IRES	Mus musculus
SRR11425581_117355gene=Ppp5c	non-Kozak	m6A	non-6nt	IRES	Mus musculus
SRR11425581_117548gene=Rbm6	non-Kozak	m6A	non-6nt	IRES	Mus musculus
SRR11425581_117714gene=Tcf4	non-Kozak	m6A	non-6nt	IRES	Mus musculus
SRR11425581_117984gene=Dek	non-Kozak	non-m6A	non-6nt	IRES	Mus musculus
SRR11425581_118035gene=Xylt1	non-Kozak	non-m6A	non-6nt	IRES	Mus musculus
SRR11425581_118291gene=Phospho2	non-Kozak	m6A	non-6nt	IRES	Mus musculus
SRR11425581_118425gene=Tmem150c	non-Kozak	m6A	non-6nt	IRES	Mus musculus
SRR11425581_118751gene=Rbks	non-Kozak	non-m6A	non-6nt	IRES	Mus musculus
SRR11425581_118772gene=Tpm1	non-Kozak	non-m6A	non-6nt	IRES	Mus musculus
SRR11425581_118792gene=Eif4e	non-Kozak	non-m6A	non-6nt	IRES	Mus musculus
SRR11425581_118800gene=Emc2	non-Kozak	m6A	non-6nt	non-IRES	Mus musculus
SRR11425581_118998gene=Cox7c	non-Kozak	non-m6A	non-6nt	IRES	Mus musculus
SRR11425581_119193gene=Hectd2	non-Kozak	non-m6A	non-6nt	IRES	Mus musculus
SRR11425581_119242gene=Yipf1	non-Kozak	non-m6A	non-6nt	non-IRES	Mus musculus
SRR11425581_119272gene=Hspbap1	non-Kozak	m6A	non-6nt	IRES	Mus musculus
SRR11425581_119315gene=Prpf40a	non-Kozak	non-m6A	non-6nt	IRES	Mus musculus
SRR11425581_119379gene=Nhej1	non-Kozak	non-m6A	non-6nt	non-IRES	Mus musculus
SRR11425581_119391gene=Pls3	non-Kozak	m6A	non-6nt	IRES	Mus musculus
SRR11425581_119580gene=Pls3	non-Kozak	non-m6A	non-6nt	IRES	Mus musculus
SRR11425581_119726gene=Zfp654	non-Kozak	non-m6A	non-6nt	IRES	Mus musculus
SRR11425581_119733gene=Tenm3	non-Kozak	m6A	non-6nt	non-IRES	Mus musculus
SRR11425581_119826gene=Tomm40	non-Kozak	non-m6A	non-6nt	IRES	Mus musculus
SRR11425581_119976gene=Ufl1	non-Kozak	m6A	non-6nt	IRES	Mus musculus
SRR11425581_120150gene=Rtkn2	non-Kozak	non-m6A	non-6nt	IRES	Mus musculus
SRR11425581_120343gene=Atp5b	non-Kozak	non-m6A	non-6nt	IRES	Mus musculus
SRR11425581_121196gene=Esf1	non-Kozak	non-m6A	non-6nt	IRES	Mus musculus
SRR11425581_121514gene=Psma5	non-Kozak	non-m6A	non-6nt	IRES	Mus musculus
SRR11425581_121537gene=Epdr1	non-Kozak	non-m6A	non-6nt	IRES	Mus musculus
SRR11425581_121862gene=Sh2d3c	non-Kozak	m6A	non-6nt	IRES	Mus musculus
SRR11425581_122080gene=Pde1a	non-Kozak	non-m6A	non-6nt	IRES	Mus musculus
SRR11425581_122427gene=Sema6d	non-Kozak	m6A	non-6nt	IRES	Mus musculus
SRR11425581_122823gene=Ube2cbp	non-Kozak	m6A	non-6nt	IRES	Mus musculus
SRR11425581_122873gene=Zcchc4	non-Kozak	non-m6A	non-6nt	IRES	Mus musculus
SRR11425581_123693gene=Arid4b	non-Kozak	non-m6A	non-6nt	IRES	Mus musculus
SRR11425581_123973gene=Macf1	non-Kozak	m6A	non-6nt	IRES	Mus musculus
SRR11425581_124565gene=Aagab	non-Kozak	m6A	non-6nt	IRES	Mus musculus
SRR11425581_124819gene=Nemf	non-Kozak	m6A	non-6nt	IRES	Mus musculus
SRR11425581_124823gene=Gm38486	non-Kozak	m6A	non-6nt	IRES	Mus musculus
SRR11425581_124860gene=Tcp11l2	non-Kozak	non-m6A	non-6nt	IRES	Mus musculus
SRR11425581_124928gene=Fbxo8	non-Kozak	non-m6A	non-6nt	IRES	Mus musculus
SRR11425581_125179gene=Macf1	non-Kozak	m6A	non-6nt	IRES	Mus musculus
SRR11425581_125490gene=Scyl3	non-Kozak	m6A	non-6nt	IRES	Mus musculus
SRR11425581_125753gene=Fam217b	non-Kozak	m6A	non-6nt	IRES	Mus musculus
SRR11425581_125916gene=Bmt2	non-Kozak	m6A	non-6nt	IRES	Mus musculus
SRR11425581_126127gene=Slc9a9	non-Kozak	non-m6A	non-6nt	IRES	Mus musculus
SRR11425581_126176gene=Atxn7l2	non-Kozak	m6A	non-6nt	IRES	Mus musculus
SRR11425581_126252gene=Mrpl19	non-Kozak	m6A	non-6nt	IRES	Mus musculus
SRR11425581_126743gene=Scp2	non-Kozak	non-m6A	non-6nt	IRES	Mus musculus
SRR11425581_126773gene=Pdcd10	non-Kozak	non-m6A	non-6nt	IRES	Mus musculus
SRR11425581_127400gene=Gsap	non-Kozak	non-m6A	non-6nt	IRES	Mus musculus
SRR11425581_127677gene=Scfd1	non-Kozak	m6A	non-6nt	IRES	Mus musculus
SRR11425581_127801gene=Nf1	non-Kozak	m6A	non-6nt	IRES	Mus musculus
SRR11425581_127973gene=Glt8d1	non-Kozak	non-m6A	non-6nt	non-IRES	Mus musculus
SRR11425581_127975gene=Glt8d1	non-Kozak	m6A	non-6nt	IRES	Mus musculus
SRR11425581_128019gene=Ccne2	non-Kozak	non-m6A	non-6nt	IRES	Mus musculus
SRR11425581_128083gene=Mtx2	non-Kozak	m6A	non-6nt	IRES	Mus musculus
SRR11425581_128116gene=Gm40228	non-Kozak	non-m6A	non-6nt	IRES	Mus musculus
SRR11425581_128209gene=Atp5j2	non-Kozak	m6A	non-6nt	IRES	Mus musculus
SRR11425581_128734gene=Tfeb	non-Kozak	non-m6A	non-6nt	IRES	Mus musculus
SRR11425581_128741gene=Poc1b	non-Kozak	m6A	non-6nt	IRES	Mus musculus
SRR11425581_128980gene=Mpped2	non-Kozak	m6A	non-6nt	IRES	Mus musculus
SRR11425581_128998gene=Gpaa1	non-Kozak	non-m6A	non-6nt	non-IRES	Mus musculus
SRR11425581_129004gene=9330179D12Rik	non-Kozak	non-m6A	non-6nt	IRES	Mus musculus
SRR11425581_129213gene=Ppme1	non-Kozak	m6A	non-6nt	IRES	Mus musculus
SRR11425581_129229gene=Gnptab	non-Kozak	m6A	non-6nt	IRES	Mus musculus
SRR11425581_129518gene=Gtf2e2	non-Kozak	m6A	non-6nt	IRES	Mus musculus
SRR11425581_129614gene=Znrf2	non-Kozak	non-m6A	non-6nt	IRES	Mus musculus
SRR11425581_130653gene=Btbd10	non-Kozak	non-m6A	non-6nt	IRES	Mus musculus
SRR11425581_130817gene=Stx8	non-Kozak	non-m6A	non-6nt	IRES	Mus musculus
SRR11425581_130967gene=Arl6	non-Kozak	m6A	non-6nt	IRES	Mus musculus
SRR11425581_131030gene=Cct8	non-Kozak	m6A	non-6nt	IRES	Mus musculus
SRR11425581_131350gene=Smurf2	non-Kozak	m6A	non-6nt	IRES	Mus musculus
SRR11425581_131565gene=Leng8	non-Kozak	non-m6A	non-6nt	IRES	Mus musculus
SRR11425581_131925gene=Med13	non-Kozak	non-m6A	non-6nt	IRES	Mus musculus
SRR11425581_132204gene=Asb3	non-Kozak	non-m6A	non-6nt	IRES	Mus musculus
SRR11425581_132367gene=Coq3	non-Kozak	non-m6A	non-6nt	IRES	Mus musculus
SRR11425581_132424gene=Lrrc7	non-Kozak	non-m6A	non-6nt	IRES	Mus musculus
SRR11425581_13247gene=Msra	non-Kozak	non-m6A	non-6nt	IRES	Mus musculus
SRR11425581_132524gene=Srbd1	non-Kozak	non-m6A	non-6nt	IRES	Mus musculus
SRR11425581_132547gene=Rbm41	non-Kozak	m6A	non-6nt	IRES	Mus musculus
SRR11425581_132594gene=Sik3	non-Kozak	m6A	non-6nt	IRES	Mus musculus
SRR11425581_132624gene=Add3	non-Kozak	non-m6A	non-6nt	IRES	Mus musculus
SRR11425581_133982gene=Cnot1	non-Kozak	m6A	non-6nt	IRES	Mus musculus
SRR11425581_133986gene=Psma1	non-Kozak	m6A	non-6nt	IRES	Mus musculus
SRR11425581_134052gene=Sgk3	non-Kozak	non-m6A	non-6nt	IRES	Mus musculus
SRR11425581_134054gene=Sgk3	non-Kozak	m6A	non-6nt	IRES	Mus musculus
SRR11425581_134591gene=Ift74	non-Kozak	m6A	non-6nt	IRES	Mus musculus
SRR11425581_134623gene=Cbx3-ps6	non-Kozak	m6A	non-6nt	IRES	Mus musculus
SRR11425581_134989gene=Snta1	non-Kozak	non-m6A	non-6nt	IRES	Mus musculus
SRR11425581_135119gene=Chordc1	non-Kozak	non-m6A	non-6nt	IRES	Mus musculus
SRR11425581_135554gene=Farp1	non-Kozak	m6A	non-6nt	IRES	Mus musculus
SRR11425581_135858gene=Vps36	non-Kozak	non-m6A	non-6nt	IRES	Mus musculus
SRR11425581_135982gene=Plekha6	non-Kozak	non-m6A	non-6nt	IRES	Mus musculus
SRR11425581_136195gene=Slc25a30	non-Kozak	m6A	non-6nt	IRES	Mus musculus
SRR11425581_136278gene=Septin10	non-Kozak	non-m6A	non-6nt	IRES	Mus musculus
SRR11425581_136329gene=Mettl9	non-Kozak	m6A	non-6nt	IRES	Mus musculus
SRR11425581_136340gene=Kctd16	non-Kozak	non-m6A	non-6nt	IRES	Mus musculus
SRR11425581_136702gene=Flywch1	non-Kozak	non-m6A	non-6nt	non-IRES	Mus musculus
SRR11425581_136733gene=2700097O09Rik	non-Kozak	non-m6A	non-6nt	IRES	Mus musculus
SRR11425581_136945gene=Lmnb1	non-Kozak	non-m6A	non-6nt	IRES	Mus musculus
SRR11425581_137069gene=Rps13	non-Kozak	m6A	non-6nt	IRES	Mus musculus
SRR11425581_137130gene=Supt3	non-Kozak	non-m6A	non-6nt	IRES	Mus musculus
SRR11425581_137690gene=Hnrnpa0	non-Kozak	m6A	non-6nt	IRES	Mus musculus
SRR11425581_138011gene=Slc35f5	non-Kozak	non-m6A	non-6nt	IRES	Mus musculus
SRR11425581_138055gene=Vapa	non-Kozak	non-m6A	non-6nt	IRES	Mus musculus
SRR11425581_138056gene=Vapa	non-Kozak	m6A	non-6nt	IRES	Mus musculus
SRR11425581_138282gene=Sirt1	non-Kozak	m6A	non-6nt	IRES	Mus musculus
SRR11425581_138465gene=Pigf	non-Kozak	m6A	non-6nt	IRES	Mus musculus
SRR11425581_138954gene=Gbe1	non-Kozak	non-m6A	non-6nt	IRES	Mus musculus
SRR11425581_139027gene=As3mt	non-Kozak	non-m6A	non-6nt	IRES	Mus musculus
SRR11425581_139095gene=Kiz	non-Kozak	m6A	non-6nt	IRES	Mus musculus
SRR11425581_139263gene=Dbt	non-Kozak	non-m6A	non-6nt	IRES	Mus musculus
SRR11425581_139272gene=Med6	non-Kozak	non-m6A	non-6nt	IRES	Mus musculus
SRR11425581_139348gene=Rpp30	non-Kozak	m6A	non-6nt	IRES	Mus musculus
SRR11425581_139387gene=Gclm	non-Kozak	m6A	non-6nt	IRES	Mus musculus
SRR11425581_13965gene=Etnk1	non-Kozak	m6A	non-6nt	IRES	Mus musculus
SRR11425581_139968gene=Tdp2	non-Kozak	non-m6A	non-6nt	IRES	Mus musculus
SRR11425581_141325gene=Ctdnep1	non-Kozak	non-m6A	non-6nt	IRES	Mus musculus
SRR11425581_141387gene=Gfm2	non-Kozak	m6A	non-6nt	non-IRES	Mus musculus
SRR11425581_141799gene=Fancc	non-Kozak	m6A	non-6nt	IRES	Mus musculus
SRR11425581_14200gene=Tom1l2	non-Kozak	m6A	non-6nt	IRES	Mus musculus
SRR11425581_142145gene=Slc16a2	non-Kozak	m6A	non-6nt	IRES	Mus musculus
SRR11425581_142173gene=Tfb1m	non-Kozak	m6A	non-6nt	IRES	Mus musculus
SRR11425581_142299gene=Ncam1	non-Kozak	m6A	non-6nt	IRES	Mus musculus
SRR11425581_142334gene=Jpt2	non-Kozak	m6A	non-6nt	IRES	Mus musculus
SRR11425581_142616gene=Khdrbs2	non-Kozak	m6A	non-6nt	non-IRES	Mus musculus
SRR11425581_142758gene=Yipf6	non-Kozak	non-m6A	non-6nt	IRES	Mus musculus
SRR11425581_142886gene=Spg20	non-Kozak	m6A	non-6nt	IRES	Mus musculus
SRR11425581_142947gene=Alg3	non-Kozak	m6A	non-6nt	IRES	Mus musculus
SRR11425581_143108gene=Mme	non-Kozak	non-m6A	non-6nt	IRES	Mus musculus
SRR11425581_143257gene=Ap4e1	non-Kozak	non-m6A	non-6nt	IRES	Mus musculus
SRR11425581_143294gene=Lyst	non-Kozak	non-m6A	non-6nt	IRES	Mus musculus
SRR11425581_143376gene=Disp1	non-Kozak	non-m6A	non-6nt	IRES	Mus musculus
SRR11425581_143377gene=Disp1	non-Kozak	m6A	non-6nt	non-IRES	Mus musculus
SRR11425581_143543gene=Clasp2	non-Kozak	non-m6A	non-6nt	IRES	Mus musculus
SRR11425581_144292gene=Oxr1	non-Kozak	non-m6A	non-6nt	IRES	Mus musculus
SRR11425581_144327gene=Cic	non-Kozak	non-m6A	non-6nt	non-IRES	Mus musculus
SRR11425581_144764gene=Hikeshi	non-Kozak	non-m6A	non-6nt	IRES	Mus musculus
SRR11425581_144913gene=Klhdc2	non-Kozak	m6A	non-6nt	IRES	Mus musculus
SRR11425581_145232gene=Huwe1	non-Kozak	non-m6A	non-6nt	IRES	Mus musculus
SRR11425581_145273gene=Eef1akmt2	non-Kozak	non-m6A	non-6nt	IRES	Mus musculus
SRR11425581_145581gene=Tent2	non-Kozak	m6A	non-6nt	IRES	Mus musculus
SRR11425581_145691gene=Mlxipl	non-Kozak	m6A	non-6nt	non-IRES	Mus musculus
SRR11425581_145920gene=Angpt2	non-Kozak	non-m6A	non-6nt	IRES	Mus musculus
SRR11425581_145934gene=Lyrm7	non-Kozak	non-m6A	non-6nt	IRES	Mus musculus
SRR11425581_146221gene=Fxn	non-Kozak	non-m6A	non-6nt	IRES	Mus musculus
SRR11425581_146274gene=Sec22a	non-Kozak	non-m6A	non-6nt	IRES	Mus musculus
SRR11425581_146426gene=Macf1	non-Kozak	m6A	non-6nt	IRES	Mus musculus
SRR11425581_146465gene=Ybx1	non-Kozak	non-m6A	non-6nt	IRES	Mus musculus
SRR11425581_146556gene=Cdk13	non-Kozak	non-m6A	non-6nt	IRES	Mus musculus
SRR11425581_146728gene=Gramd4	non-Kozak	m6A	non-6nt	IRES	Mus musculus
SRR11425581_146798gene=Utp18	non-Kozak	non-m6A	non-6nt	IRES	Mus musculus
SRR11425581_146826gene=Kirrel3	non-Kozak	non-m6A	non-6nt	non-IRES	Mus musculus
SRR11425581_147032gene=Nup210l	non-Kozak	m6A	non-6nt	IRES	Mus musculus
SRR11425581_147464gene=Ripk2	non-Kozak	m6A	non-6nt	IRES	Mus musculus
SRR11425581_147727gene=Rab11fip5	non-Kozak	m6A	non-6nt	IRES	Mus musculus
SRR11425581_148149gene=Usp48	non-Kozak	non-m6A	non-6nt	IRES	Mus musculus
SRR11425581_148185gene=Gk5	non-Kozak	m6A	non-6nt	IRES	Mus musculus
SRR11425581_148220gene=Mef2c	non-Kozak	m6A	non-6nt	IRES	Mus musculus
SRR11425581_149018gene=Atxn10	non-Kozak	m6A	non-6nt	IRES	Mus musculus
SRR11425581_149037gene=Trappc8	non-Kozak	m6A	non-6nt	IRES	Mus musculus
SRR11425581_1490gene=Crebbp	non-Kozak	non-m6A	non-6nt	IRES	Mus musculus
SRR11425581_149256gene=Hspbp1	non-Kozak	m6A	non-6nt	IRES	Mus musculus
SRR11425581_149298gene=Dhdds	non-Kozak	non-m6A	non-6nt	IRES	Mus musculus
SRR11425581_149544gene=Ep400	non-Kozak	m6A	non-6nt	IRES	Mus musculus
SRR11425581_149578gene=Ascc1	non-Kozak	m6A	non-6nt	IRES	Mus musculus
SRR11425581_149653gene=Ppp2r2a	non-Kozak	non-m6A	non-6nt	IRES	Mus musculus
SRR11425581_149950gene=Zfp263	non-Kozak	m6A	non-6nt	IRES	Mus musculus
SRR11425581_150014gene=Usp30	non-Kozak	m6A	non-6nt	non-IRES	Mus musculus
SRR11425581_150478gene=Ppp3ca	non-Kozak	m6A	non-6nt	IRES	Mus musculus
SRR11425581_150713gene=Rab30	non-Kozak	m6A	non-6nt	IRES	Mus musculus
SRR11425581_150796gene=Rsrc2	non-Kozak	non-m6A	non-6nt	IRES	Mus musculus
SRR11425581_150972gene=Hnrnpl	non-Kozak	non-m6A	non-6nt	IRES	Mus musculus
SRR11425581_151014gene=Camsap1	non-Kozak	m6A	non-6nt	non-IRES	Mus musculus
SRR11425581_151030gene=Otulinl	non-Kozak	non-m6A	non-6nt	IRES	Mus musculus
SRR11425581_151041gene=Zfp638	non-Kozak	m6A	non-6nt	IRES	Mus musculus
SRR11425581_151057gene=Tgfbr3	non-Kozak	m6A	non-6nt	IRES	Mus musculus
SRR11425581_151122gene=Cnksr3	non-Kozak	m6A	non-6nt	IRES	Mus musculus
SRR11425581_151147gene=Rnf6	non-Kozak	non-m6A	non-6nt	IRES	Mus musculus
SRR11425581_151232gene=Tob1	non-Kozak	m6A	non-6nt	IRES	Mus musculus
SRR11425581_151248gene=Fam136a	non-Kozak	m6A	non-6nt	IRES	Mus musculus
SRR11425581_151419gene=Rbms1	non-Kozak	non-m6A	non-6nt	non-IRES	Mus musculus
SRR11425581_151457gene=Trip12	non-Kozak	m6A	non-6nt	IRES	Mus musculus
SRR11425581_15147gene=Tmem132b	non-Kozak	m6A	non-6nt	IRES	Mus musculus
SRR11425581_151499gene=Ephx2	non-Kozak	m6A	non-6nt	non-IRES	Mus musculus
SRR11425581_151510gene=Macrod2	non-Kozak	m6A	non-6nt	IRES	Mus musculus
SRR11425581_151726gene=A330008L17Rik	non-Kozak	non-m6A	non-6nt	IRES	Mus musculus
SRR11425581_151729gene=Plcb1	non-Kozak	non-m6A	non-6nt	IRES	Mus musculus
SRR11425581_151839gene=Scaf4	non-Kozak	m6A	non-6nt	IRES	Mus musculus
SRR11425581_151970gene=Reep3	non-Kozak	non-m6A	non-6nt	IRES	Mus musculus
SRR11425581_152117gene=Ddx56	non-Kozak	non-m6A	non-6nt	IRES	Mus musculus
SRR11425581_152140gene=Map1s	non-Kozak	m6A	non-6nt	non-IRES	Mus musculus
SRR11425581_152276gene=Coq10b	non-Kozak	non-m6A	non-6nt	IRES	Mus musculus
SRR11425581_152339gene=Tpt1	non-Kozak	m6A	non-6nt	IRES	Mus musculus
SRR11425581_152353gene=Ebag9	non-Kozak	m6A	non-6nt	IRES	Mus musculus
SRR11425581_152407gene=Pcnx	non-Kozak	m6A	non-6nt	IRES	Mus musculus
SRR11425581_152457gene=Ppm1k	non-Kozak	m6A	non-6nt	IRES	Mus musculus
SRR11425581_152585gene=Elf1	non-Kozak	non-m6A	non-6nt	IRES	Mus musculus
SRR11425581_152669gene=Map3k8	non-Kozak	m6A	non-6nt	non-IRES	Mus musculus
SRR11425581_152901gene=Dcbld1	non-Kozak	m6A	non-6nt	IRES	Mus musculus
SRR11425581_153412gene=Mtf2	non-Kozak	non-m6A	non-6nt	IRES	Mus musculus
SRR11425581_153437gene=Atf2	non-Kozak	m6A	non-6nt	IRES	Mus musculus
SRR11425581_153617gene=Setd5	non-Kozak	non-m6A	non-6nt	IRES	Mus musculus
SRR11425581_153908gene=Pdlim1	non-Kozak	non-m6A	non-6nt	non-IRES	Mus musculus
SRR11425581_154179gene=Pcca	non-Kozak	non-m6A	non-6nt	IRES	Mus musculus
SRR11425581_154254gene=Tatdn1	non-Kozak	m6A	non-6nt	IRES	Mus musculus
SRR11425581_154318gene=Dst	non-Kozak	non-m6A	non-6nt	IRES	Mus musculus
SRR11425581_154360gene=Thoc2	non-Kozak	non-m6A	non-6nt	IRES	Mus musculus
SRR11425581_154387gene=Pcm1	non-Kozak	m6A	non-6nt	IRES	Mus musculus
SRR11425581_154425gene=Btf3	non-Kozak	non-m6A	non-6nt	IRES	Mus musculus
SRR11425581_154502gene=intergenic	non-Kozak	non-m6A	non-6nt	IRES	Mus musculus
SRR11425581_154712gene=Nrxn1	non-Kozak	non-m6A	non-6nt	IRES	Mus musculus
SRR11425581_154731gene=Alg6	non-Kozak	m6A	non-6nt	IRES	Mus musculus
SRR11425581_154801gene=Wdr37	non-Kozak	m6A	non-6nt	IRES	Mus musculus
SRR11425581_155092gene=Gnl3	non-Kozak	m6A	non-6nt	IRES	Mus musculus
SRR11425581_155185gene=Acyp2	non-Kozak	non-m6A	non-6nt	non-IRES	Mus musculus
SRR11425581_155212gene=Trappc6a	non-Kozak	m6A	non-6nt	IRES	Mus musculus
SRR11425581_155389gene=Slc38a1	non-Kozak	non-m6A	non-6nt	non-IRES	Mus musculus
SRR11425581_155426gene=Lpcat2	non-Kozak	non-m6A	non-6nt	IRES	Mus musculus
SRR11425581_155763gene=Rnf114	non-Kozak	m6A	non-6nt	IRES	Mus musculus
SRR11425581_155946gene=Ppp1r14c	non-Kozak	non-m6A	non-6nt	IRES	Mus musculus
SRR11425581_155994gene=Camk2n2	non-Kozak	non-m6A	non-6nt	IRES	Mus musculus
SRR11425581_156045gene=Rps6ka5	non-Kozak	non-m6A	non-6nt	IRES	Mus musculus
SRR11425581_156146gene=Galnt13	non-Kozak	non-m6A	non-6nt	IRES	Mus musculus
SRR11425581_156290gene=Slc35b3	non-Kozak	non-m6A	non-6nt	non-IRES	Mus musculus
SRR11425581_156392gene=Fgf14	non-Kozak	m6A	non-6nt	non-IRES	Mus musculus
SRR11425581_156501gene=Prps2	non-Kozak	non-m6A	non-6nt	IRES	Mus musculus
SRR11425581_156666gene=Fgf14	non-Kozak	non-m6A	non-6nt	non-IRES	Mus musculus
SRR11425581_15693gene=Zfp148	non-Kozak	m6A	non-6nt	IRES	Mus musculus
SRR11425581_156982gene=Ndufv2	non-Kozak	non-m6A	non-6nt	IRES	Mus musculus
SRR11425581_157012gene=Gm13916	non-Kozak	non-m6A	non-6nt	non-IRES	Mus musculus
SRR11425581_157050gene=Rsrc2	non-Kozak	non-m6A	non-6nt	IRES	Mus musculus
SRR11425581_157435gene=Dars2	non-Kozak	m6A	non-6nt	IRES	Mus musculus
SRR11425581_157472gene=Ttc17	non-Kozak	m6A	non-6nt	IRES	Mus musculus
SRR11425581_157534gene=Dcaf1	non-Kozak	non-m6A	non-6nt	IRES	Mus musculus
SRR11425581_157673gene=Grin3a	non-Kozak	non-m6A	non-6nt	IRES	Mus musculus
SRR11425581_157745gene=Zfp276	non-Kozak	m6A	non-6nt	IRES	Mus musculus
SRR11425581_157892gene=Angpt2	non-Kozak	m6A	non-6nt	IRES	Mus musculus
SRR11425581_157893gene=Sars2	non-Kozak	non-m6A	non-6nt	non-IRES	Mus musculus
SRR11425581_157992gene=Wdfy1	non-Kozak	non-m6A	non-6nt	IRES	Mus musculus
SRR11425581_158126gene=Mtch2	non-Kozak	non-m6A	non-6nt	IRES	Mus musculus
SRR11425581_158266gene=Skp1	non-Kozak	non-m6A	non-6nt	IRES	Mus musculus
SRR11425581_158316gene=Gm14698	non-Kozak	m6A	non-6nt	IRES	Mus musculus
SRR11425581_158317gene=Styx	non-Kozak	non-m6A	non-6nt	IRES	Mus musculus
SRR11425581_158336gene=Thoc7	non-Kozak	non-m6A	non-6nt	non-IRES	Mus musculus
SRR11425581_158433gene=Eif1b	non-Kozak	m6A	non-6nt	IRES	Mus musculus
SRR11425581_158454gene=Prkcb	non-Kozak	m6A	non-6nt	IRES	Mus musculus
SRR11425581_158531gene=Ltn1	non-Kozak	non-m6A	non-6nt	IRES	Mus musculus
SRR11425581_158791gene=intergenic	non-Kozak	m6A	non-6nt	IRES	Mus musculus
SRR11425581_159012gene=Washc4	non-Kozak	non-m6A	non-6nt	IRES	Mus musculus
SRR11425581_159499gene=Zfand6	non-Kozak	non-m6A	non-6nt	IRES	Mus musculus
SRR11425581_15950gene=Homer1	non-Kozak	m6A	non-6nt	non-IRES	Mus musculus
SRR11425581_159698gene=Cdc14a	non-Kozak	non-m6A	non-6nt	IRES	Mus musculus
SRR11425581_159722gene=Mdn1	non-Kozak	non-m6A	non-6nt	IRES	Mus musculus
SRR11425581_159936gene=Insig2	non-Kozak	m6A	non-6nt	IRES	Mus musculus
SRR11425581_160269gene=Zfp277	non-Kozak	m6A	non-6nt	IRES	Mus musculus
SRR11425581_160927gene=Ppp6r2	non-Kozak	non-m6A	non-6nt	IRES	Mus musculus
SRR11425581_160975gene=Fli1	non-Kozak	m6A	non-6nt	IRES	Mus musculus
SRR11425581_161040gene=Wipi2	non-Kozak	non-m6A	non-6nt	IRES	Mus musculus
SRR11425581_161283gene=Apex2	non-Kozak	non-m6A	non-6nt	IRES	Mus musculus
SRR11425581_161398gene=Agbl4	non-Kozak	non-m6A	non-6nt	non-IRES	Mus musculus
SRR11425581_161668gene=Uaca	non-Kozak	m6A	non-6nt	IRES	Mus musculus
SRR11425581_161851gene=Mpzl1	non-Kozak	non-m6A	non-6nt	IRES	Mus musculus
SRR11425581_162592gene=Pkp4	non-Kozak	m6A	non-6nt	IRES	Mus musculus
SRR11425581_162638gene=Adap1	non-Kozak	non-m6A	non-6nt	IRES	Mus musculus
SRR11425581_162661gene=Slc16a4	non-Kozak	non-m6A	non-6nt	IRES	Mus musculus
SRR11425581_162870gene=Gm33605	non-Kozak	non-m6A	non-6nt	IRES	Mus musculus
SRR11425581_162991gene=Mnd1	non-Kozak	non-m6A	non-6nt	IRES	Mus musculus
SRR11425581_162995gene=Pip4k2a	non-Kozak	non-m6A	non-6nt	IRES	Mus musculus
SRR11425581_163008gene=Efcab2	non-Kozak	non-m6A	non-6nt	non-IRES	Mus musculus
SRR11425581_163233gene=Anxa4	non-Kozak	m6A	non-6nt	IRES	Mus musculus
SRR11425581_163404gene=Nme7	non-Kozak	non-m6A	non-6nt	non-IRES	Mus musculus
SRR11425581_163488gene=Zc3h4	non-Kozak	m6A	non-6nt	IRES	Mus musculus
SRR11425581_163643gene=intergenic	non-Kozak	non-m6A	non-6nt	IRES	Mus musculus
SRR11425581_163761gene=Stk40	non-Kozak	non-m6A	non-6nt	IRES	Mus musculus
SRR11425581_163934gene=Mettl22	non-Kozak	non-m6A	non-6nt	IRES	Mus musculus
SRR11425581_164313gene=Cit	non-Kozak	non-m6A	non-6nt	IRES	Mus musculus
SRR11425581_164522gene=Dhrs3	non-Kozak	m6A	non-6nt	IRES	Mus musculus
SRR11425581_164643gene=Plppr4	non-Kozak	m6A	non-6nt	IRES	Mus musculus
SRR11425581_164651gene=Ehmt1	non-Kozak	m6A	non-6nt	IRES	Mus musculus
SRR11425581_164675gene=Commd3	non-Kozak	non-m6A	non-6nt	IRES	Mus musculus
SRR11425581_164762gene=Ccnc	non-Kozak	non-m6A	non-6nt	IRES	Mus musculus
SRR11425581_164984gene=Eif3c	non-Kozak	non-m6A	non-6nt	IRES	Mus musculus
SRR11425581_165110gene=Sestd1	non-Kozak	non-m6A	non-6nt	IRES	Mus musculus
SRR11425581_165426gene=Fbxw11	non-Kozak	non-m6A	non-6nt	IRES	Mus musculus
SRR11425581_165587gene=Rnf166	non-Kozak	m6A	non-6nt	IRES	Mus musculus
SRR11425581_166282gene=Wdpcp	non-Kozak	non-m6A	non-6nt	IRES	Mus musculus
SRR11425581_166557gene=Zzef1	non-Kozak	non-m6A	non-6nt	IRES	Mus musculus
SRR11425581_166581gene=Nfasc	non-Kozak	non-m6A	non-6nt	IRES	Mus musculus
SRR11425581_166888gene=Mrps35	non-Kozak	non-m6A	non-6nt	non-IRES	Mus musculus
SRR11425581_167394gene=Pola1	non-Kozak	non-m6A	non-6nt	IRES	Mus musculus
SRR11425581_16739gene=Slc9a7	non-Kozak	non-m6A	non-6nt	IRES	Mus musculus
SRR11425581_167720gene=Vcp	non-Kozak	non-m6A	non-6nt	IRES	Mus musculus
SRR11425581_167927gene=Cnih1	non-Kozak	non-m6A	non-6nt	IRES	Mus musculus
SRR11425581_168137gene=Grik5	non-Kozak	non-m6A	non-6nt	IRES	Mus musculus
SRR11425581_16819gene=Septin11	non-Kozak	m6A	non-6nt	IRES	Mus musculus
SRR11425581_168307gene=Hspa5	non-Kozak	m6A	non-6nt	IRES	Mus musculus
SRR11425581_168342gene=B230307C23Rik	non-Kozak	m6A	non-6nt	non-IRES	Mus musculus
SRR11425581_168496gene=Lrp1	non-Kozak	non-m6A	non-6nt	IRES	Mus musculus
SRR11425581_169250gene=Cibar1	non-Kozak	m6A	non-6nt	non-IRES	Mus musculus
SRR11425581_169797gene=Ndufaf2	non-Kozak	non-m6A	non-6nt	non-IRES	Mus musculus
SRR11425581_169869gene=Zfp783	non-Kozak	m6A	non-6nt	IRES	Mus musculus
SRR11425581_170404gene=Tro	non-Kozak	non-m6A	non-6nt	IRES	Mus musculus
SRR11425581_170466gene=Slc38a6	non-Kozak	non-m6A	non-6nt	IRES	Mus musculus
SRR11425581_170970gene=Ints13	non-Kozak	non-m6A	non-6nt	IRES	Mus musculus
SRR11425581_171626gene=Chd8	non-Kozak	non-m6A	non-6nt	IRES	Mus musculus
SRR11425581_172154gene=Negr1	non-Kozak	m6A	non-6nt	IRES	Mus musculus
SRR11425581_17262gene=Nktr	non-Kozak	non-m6A	non-6nt	IRES	Mus musculus
SRR11425581_173011gene=Stxbp3	non-Kozak	non-m6A	non-6nt	IRES	Mus musculus
SRR11425581_173044gene=Arid4a	non-Kozak	m6A	non-6nt	IRES	Mus musculus
SRR11425581_173946gene=Akap6	non-Kozak	non-m6A	non-6nt	IRES	Mus musculus
SRR11425581_174573gene=Mrpl34	non-Kozak	m6A	non-6nt	IRES	Mus musculus
SRR11425581_174610gene=Lrrc8d	non-Kozak	non-m6A	non-6nt	IRES	Mus musculus
SRR11425581_175760gene=intergenic	non-Kozak	non-m6A	non-6nt	non-IRES	Mus musculus
SRR11425581_176082gene=Tiam1	non-Kozak	non-m6A	non-6nt	non-IRES	Mus musculus
SRR11425581_18035gene=Lrrk2	non-Kozak	non-m6A	non-6nt	IRES	Mus musculus
SRR11425581_18985gene=Fgf14	non-Kozak	m6A	non-6nt	IRES	Mus musculus
SRR11425581_19040gene=Myo5a	non-Kozak	non-m6A	non-6nt	IRES	Mus musculus
SRR11425581_19727gene=Mtmr3	non-Kozak	m6A	non-6nt	IRES	Mus musculus
SRR11425581_21501gene=Spns2	non-Kozak	non-m6A	non-6nt	IRES	Mus musculus
SRR11425581_2200gene=Cul9	non-Kozak	non-m6A	non-6nt	non-IRES	Mus musculus
SRR11425581_23012gene=Ube2b	non-Kozak	m6A	non-6nt	IRES	Mus musculus
SRR11425581_23287gene=Cdk8	non-Kozak	non-m6A	non-6nt	IRES	Mus musculus
SRR11425581_23353gene=Abcc5	non-Kozak	m6A	non-6nt	IRES	Mus musculus
SRR11425581_23556gene=Dzank1	non-Kozak	non-m6A	non-6nt	IRES	Mus musculus
SRR11425581_24517gene=Drp2	non-Kozak	non-m6A	non-6nt	IRES	Mus musculus
SRR11425581_25733gene=Ndufb7	non-Kozak	non-m6A	non-6nt	non-IRES	Mus musculus
SRR11425581_25967gene=Dip2b	non-Kozak	non-m6A	non-6nt	IRES	Mus musculus
SRR11425581_26458gene=Fam168a	non-Kozak	m6A	non-6nt	IRES	Mus musculus
SRR11425581_27111gene=Slc45a4	non-Kozak	m6A	non-6nt	IRES	Mus musculus
SRR11425581_29780gene=Vps35l	non-Kozak	non-m6A	non-6nt	IRES	Mus musculus
SRR11425581_30051gene=Auts2	non-Kozak	m6A	non-6nt	IRES	Mus musculus
SRR11425581_30310gene=Phc3	non-Kozak	non-m6A	non-6nt	IRES	Mus musculus
SRR11425581_30734gene=Alkbh8	non-Kozak	non-m6A	non-6nt	IRES	Mus musculus
SRR11425581_31526gene=Ptpa	non-Kozak	m6A	non-6nt	IRES	Mus musculus
SRR11425581_3160gene=Tnrc6c	non-Kozak	non-m6A	non-6nt	IRES	Mus musculus
SRR11425581_32442gene=Spg11	non-Kozak	m6A	non-6nt	IRES	Mus musculus
SRR11425581_32617gene=Mapk1	non-Kozak	m6A	non-6nt	IRES	Mus musculus
SRR11425581_33046gene=Maea	non-Kozak	m6A	non-6nt	non-IRES	Mus musculus
SRR11425581_33437gene=Prdx6	non-Kozak	non-m6A	non-6nt	IRES	Mus musculus
SRR11425581_33737gene=Hectd1	non-Kozak	non-m6A	non-6nt	non-IRES	Mus musculus
SRR11425581_3390gene=Birc2	non-Kozak	non-m6A	non-6nt	IRES	Mus musculus
SRR11425581_34687gene=Wrn	non-Kozak	non-m6A	non-6nt	IRES	Mus musculus
SRR11425581_34967gene=Oxr1	non-Kozak	non-m6A	non-6nt	IRES	Mus musculus
SRR11425581_35385gene=Pick1	non-Kozak	non-m6A	non-6nt	IRES	Mus musculus
SRR11425581_35485gene=Foxp1	non-Kozak	m6A	non-6nt	non-IRES	Mus musculus
SRR11425581_35522gene=Ptk2	non-Kozak	non-m6A	non-6nt	IRES	Mus musculus
SRR11425581_35923gene=Arpp19	non-Kozak	non-m6A	non-6nt	IRES	Mus musculus
SRR11425581_35947gene=Arid2	non-Kozak	m6A	non-6nt	IRES	Mus musculus
SRR11425581_36321gene=Grin2b	non-Kozak	m6A	non-6nt	IRES	Mus musculus
SRR11425581_36673gene=Usp34	non-Kozak	non-m6A	non-6nt	IRES	Mus musculus
SRR11425581_36687gene=Zfp362	non-Kozak	non-m6A	non-6nt	non-IRES	Mus musculus
SRR11425581_37060gene=Clasrp	non-Kozak	non-m6A	non-6nt	IRES	Mus musculus
SRR11425581_37393gene=Rgs7	non-Kozak	m6A	non-6nt	IRES	Mus musculus
SRR11425581_37555gene=Dennd1a	non-Kozak	m6A	non-6nt	IRES	Mus musculus
SRR11425581_37816gene=Pds5b	non-Kozak	m6A	non-6nt	IRES	Mus musculus
SRR11425581_38009gene=Zfp180	non-Kozak	m6A	non-6nt	IRES	Mus musculus
SRR11425581_38461gene=Lsamp	non-Kozak	m6A	non-6nt	IRES	Mus musculus
SRR11425581_39041gene=Phf3	non-Kozak	non-m6A	non-6nt	IRES	Mus musculus
SRR11425581_40174gene=Snrnp48	non-Kozak	non-m6A	non-6nt	non-IRES	Mus musculus
SRR11425581_40191gene=Pitpnb	non-Kozak	non-m6A	non-6nt	IRES	Mus musculus
SRR11425581_40675gene=Glce	non-Kozak	m6A	non-6nt	IRES	Mus musculus
SRR11425581_41099gene=Vti1a	non-Kozak	m6A	non-6nt	IRES	Mus musculus
SRR11425581_41520gene=Zbtb48	non-Kozak	non-m6A	non-6nt	non-IRES	Mus musculus
SRR11425581_41527gene=Evi5	non-Kozak	non-m6A	non-6nt	non-IRES	Mus musculus
SRR11425581_42439gene=Cs	non-Kozak	m6A	non-6nt	IRES	Mus musculus
SRR11425581_42604gene=Pik3ca	non-Kozak	m6A	non-6nt	IRES	Mus musculus
SRR11425581_43063gene=Rabgap1	non-Kozak	m6A	non-6nt	IRES	Mus musculus
SRR11425581_43235gene=Ctnna2	non-Kozak	m6A	non-6nt	IRES	Mus musculus
SRR11425581_43542gene=Rasal1	non-Kozak	non-m6A	non-6nt	non-IRES	Mus musculus
SRR11425581_43566gene=Uck2	non-Kozak	m6A	non-6nt	IRES	Mus musculus
SRR11425581_43599gene=Hmgcr	non-Kozak	non-m6A	non-6nt	IRES	Mus musculus
SRR11425581_44617gene=Pdcd4	non-Kozak	m6A	non-6nt	non-IRES	Mus musculus
SRR11425581_44827gene=Klf3	non-Kozak	non-m6A	non-6nt	IRES	Mus musculus
SRR11425581_46094gene=Galnt10	non-Kozak	m6A	non-6nt	non-IRES	Mus musculus
SRR11425581_46244gene=Mtfr1l	non-Kozak	m6A	non-6nt	IRES	Mus musculus
SRR11425581_4654gene=Rtn3	non-Kozak	non-m6A	non-6nt	IRES	Mus musculus
SRR11425581_47362gene=Plcl2	non-Kozak	m6A	non-6nt	IRES	Mus musculus
SRR11425581_47452gene=Gsdme	non-Kozak	m6A	non-6nt	IRES	Mus musculus
SRR11425581_48095gene=Srgap2	non-Kozak	m6A	non-6nt	IRES	Mus musculus
SRR11425581_48802gene=Anks3	non-Kozak	m6A	non-6nt	IRES	Mus musculus
SRR11425581_48990gene=Vps35	non-Kozak	non-m6A	non-6nt	IRES	Mus musculus
SRR11425581_49246gene=Dzip3	non-Kozak	non-m6A	non-6nt	IRES	Mus musculus
SRR11425581_49374gene=Dhx30	non-Kozak	m6A	non-6nt	IRES	Mus musculus
SRR11425581_49612gene=Sfmbt1	non-Kozak	non-m6A	non-6nt	IRES	Mus musculus
SRR11425581_49782gene=Hook3	non-Kozak	non-m6A	non-6nt	IRES	Mus musculus
SRR11425581_4982gene=Traf3	non-Kozak	non-m6A	non-6nt	non-IRES	Mus musculus
SRR11425581_50013gene=Rtl1	non-Kozak	m6A	non-6nt	IRES	Mus musculus
SRR11425581_50506gene=Cul1	non-Kozak	m6A	non-6nt	IRES	Mus musculus
SRR11425581_50755gene=Tspan5	non-Kozak	m6A	non-6nt	IRES	Mus musculus
SRR11425581_51003gene=Pcdh11x	non-Kozak	m6A	non-6nt	IRES	Mus musculus
SRR11425581_51209gene=Fam135a	non-Kozak	m6A	non-6nt	IRES	Mus musculus
SRR11425581_51289gene=Onecut2	non-Kozak	m6A	non-6nt	IRES	Mus musculus
SRR11425581_51876gene=Zfp536	non-Kozak	non-m6A	non-6nt	non-IRES	Mus musculus
SRR11425581_5187gene=Cadps	non-Kozak	m6A	non-6nt	IRES	Mus musculus
SRR11425581_51923gene=Shld2	non-Kozak	m6A	non-6nt	IRES	Mus musculus
SRR11425581_52268gene=Nus1	non-Kozak	non-m6A	non-6nt	IRES	Mus musculus
SRR11425581_52502gene=Uxs1	non-Kozak	non-m6A	non-6nt	IRES	Mus musculus
SRR11425581_52947gene=Tet1	non-Kozak	m6A	non-6nt	IRES	Mus musculus
SRR11425581_52961gene=Acat1	non-Kozak	non-m6A	non-6nt	IRES	Mus musculus
SRR11425581_52970gene=Bend3	non-Kozak	non-m6A	non-6nt	non-IRES	Mus musculus
SRR11425581_53669gene=Minar1	non-Kozak	m6A	non-6nt	IRES	Mus musculus
SRR11425581_53702gene=Med23	non-Kozak	non-m6A	non-6nt	IRES	Mus musculus
SRR11425581_55411gene=Rgs4	non-Kozak	m6A	non-6nt	IRES	Mus musculus
SRR11425581_55598gene=Atrn	non-Kozak	non-m6A	non-6nt	IRES	Mus musculus
SRR11425581_55863gene=Lpin1	non-Kozak	m6A	non-6nt	IRES	Mus musculus
SRR11425581_55973gene=Sephs1	non-Kozak	non-m6A	non-6nt	non-IRES	Mus musculus
SRR11425581_56400gene=Fzd10os	non-Kozak	m6A	non-6nt	IRES	Mus musculus
SRR11425581_56507gene=Cep128	non-Kozak	m6A	non-6nt	non-IRES	Mus musculus
SRR11425581_56607gene=Hdac9	non-Kozak	non-m6A	non-6nt	non-IRES	Mus musculus
SRR11425581_56743gene=Pum1	non-Kozak	non-m6A	non-6nt	IRES	Mus musculus
SRR11425581_56923gene=Cdh7	non-Kozak	m6A	non-6nt	IRES	Mus musculus
SRR11425581_57054gene=Ipo7	non-Kozak	non-m6A	non-6nt	IRES	Mus musculus
SRR11425581_57120gene=Thoc2	non-Kozak	non-m6A	non-6nt	IRES	Mus musculus
SRR11425581_57136gene=Cnr1	non-Kozak	m6A	non-6nt	IRES	Mus musculus
SRR11425581_57762gene=Arap2	non-Kozak	m6A	non-6nt	IRES	Mus musculus
SRR11425581_57856gene=Gmfb	non-Kozak	m6A	non-6nt	IRES	Mus musculus
SRR11425581_57966gene=Nrn1	non-Kozak	non-m6A	non-6nt	IRES	Mus musculus
SRR11425581_58278gene=Mpp5	non-Kozak	non-m6A	non-6nt	IRES	Mus musculus
SRR11425581_58490gene=Fndc3a	non-Kozak	non-m6A	non-6nt	IRES	Mus musculus
SRR11425581_59360gene=Chd7	non-Kozak	non-m6A	non-6nt	IRES	Mus musculus
SRR11425581_59493gene=D130040H23Rik	non-Kozak	m6A	non-6nt	IRES	Mus musculus
SRR11425581_59906gene=Glis2	non-Kozak	non-m6A	non-6nt	IRES	Mus musculus
SRR11425581_60052gene=Ifrd1	non-Kozak	non-m6A	non-6nt	IRES	Mus musculus
SRR11425581_60356gene=Wdr36	non-Kozak	m6A	non-6nt	IRES	Mus musculus
SRR11425581_60493gene=Raly	non-Kozak	m6A	non-6nt	IRES	Mus musculus
SRR11425581_60862gene=Mecr	non-Kozak	m6A	non-6nt	IRES	Mus musculus
SRR11425581_61408gene=Insr	non-Kozak	m6A	non-6nt	IRES	Mus musculus
SRR11425581_62163gene=Ppp3cb	non-Kozak	m6A	non-6nt	IRES	Mus musculus
SRR11425581_62224gene=Cul2	non-Kozak	m6A	non-6nt	non-IRES	Mus musculus
SRR11425581_62761gene=Asb3	non-Kozak	m6A	non-6nt	IRES	Mus musculus
SRR11425581_62916gene=Rsf1	non-Kozak	m6A	non-6nt	non-IRES	Mus musculus
SRR11425581_63137gene=Ccar1	non-Kozak	non-m6A	non-6nt	IRES	Mus musculus
SRR11425581_63616gene=Usp3	non-Kozak	m6A	non-6nt	IRES	Mus musculus
SRR11425581_63784gene=Ppp1cb	non-Kozak	m6A	non-6nt	IRES	Mus musculus
SRR11425581_63813gene=Cntn6	non-Kozak	m6A	non-6nt	IRES	Mus musculus
SRR11425581_63978gene=Zc3h12c	non-Kozak	m6A	non-6nt	IRES	Mus musculus
SRR11425581_64549gene=Abcc1	non-Kozak	non-m6A	non-6nt	IRES	Mus musculus
SRR11425581_64795gene=Rbm26	non-Kozak	m6A	non-6nt	non-IRES	Mus musculus
SRR11425581_65182gene=Casp9	non-Kozak	m6A	non-6nt	IRES	Mus musculus
SRR11425581_65601gene=Cpsf7	non-Kozak	m6A	non-6nt	IRES	Mus musculus
SRR11425581_65983gene=Nfatc3	non-Kozak	m6A	non-6nt	IRES	Mus musculus
SRR11425581_65984gene=Nfatc3	non-Kozak	m6A	non-6nt	IRES	Mus musculus
SRR11425581_66595gene=Ints4	non-Kozak	non-m6A	non-6nt	IRES	Mus musculus
SRR11425581_67518gene=Csnk1g1	non-Kozak	m6A	non-6nt	IRES	Mus musculus
SRR11425581_67634gene=Rell1	non-Kozak	m6A	non-6nt	IRES	Mus musculus
SRR11425581_67809gene=Lsamp	non-Kozak	non-m6A	non-6nt	IRES	Mus musculus
SRR11425581_67990gene=Zfand4	non-Kozak	m6A	non-6nt	IRES	Mus musculus
SRR11425581_68057gene=E230016M11Rik	non-Kozak	m6A	non-6nt	IRES	Mus musculus
SRR11425581_68103gene=Baz1b	non-Kozak	non-m6A	non-6nt	IRES	Mus musculus
SRR11425581_68219gene=Kcnip4	non-Kozak	m6A	non-6nt	IRES	Mus musculus
SRR11425581_68289gene=Tdp1	non-Kozak	non-m6A	non-6nt	non-IRES	Mus musculus
SRR11425581_68301gene=Abraxas1	non-Kozak	m6A	non-6nt	IRES	Mus musculus
SRR11425581_68466gene=Gabra4	non-Kozak	m6A	non-6nt	IRES	Mus musculus
SRR11425581_69285gene=Zfp426	non-Kozak	m6A	non-6nt	IRES	Mus musculus
SRR11425581_69762gene=Vps26a	non-Kozak	m6A	non-6nt	IRES	Mus musculus
SRR11425581_69768gene=Zbtb20	non-Kozak	non-m6A	non-6nt	IRES	Mus musculus
SRR11425581_69842gene=Psme3	non-Kozak	non-m6A	non-6nt	IRES	Mus musculus
SRR11425581_69859gene=Itm2b	non-Kozak	m6A	non-6nt	IRES	Mus musculus
SRR11425581_70051gene=Swi5	non-Kozak	non-m6A	non-6nt	IRES	Mus musculus
SRR11425581_71195gene=Gm32659	non-Kozak	m6A	non-6nt	non-IRES	Mus musculus
SRR11425581_71493gene=Synj1	non-Kozak	m6A	non-6nt	IRES	Mus musculus
SRR11425581_71748gene=Smap2	non-Kozak	m6A	non-6nt	IRES	Mus musculus
SRR11425581_71854gene=Wdr44	non-Kozak	m6A	non-6nt	IRES	Mus musculus
SRR11425581_71869gene=Mipep	non-Kozak	non-m6A	non-6nt	IRES	Mus musculus
SRR11425581_71906gene=Zscan21	non-Kozak	m6A	non-6nt	IRES	Mus musculus
SRR11425581_721gene=Nme7	non-Kozak	non-m6A	non-6nt	IRES	Mus musculus
SRR11425581_72297gene=Kcnd2	non-Kozak	m6A	non-6nt	IRES	Mus musculus
SRR11425581_72298gene=Tgs1	non-Kozak	m6A	non-6nt	non-IRES	Mus musculus
SRR11425581_72801gene=Fam78b	non-Kozak	m6A	non-6nt	IRES	Mus musculus
SRR11425581_72937gene=S100pbp	non-Kozak	m6A	non-6nt	IRES	Mus musculus
SRR11425581_73213gene=Rbfox1	non-Kozak	m6A	non-6nt	IRES	Mus musculus
SRR11425581_73386gene=Shisa6	non-Kozak	m6A	non-6nt	IRES	Mus musculus
SRR11425581_73466gene=Naa35	non-Kozak	m6A	non-6nt	IRES	Mus musculus
SRR11425581_73540gene=Nmt1	non-Kozak	non-m6A	non-6nt	IRES	Mus musculus
SRR11425581_74101gene=Dock7	non-Kozak	non-m6A	non-6nt	IRES	Mus musculus
SRR11425581_74168gene=Gdap2	non-Kozak	non-m6A	non-6nt	IRES	Mus musculus
SRR11425581_74332gene=Catspere2	non-Kozak	non-m6A	non-6nt	IRES	Mus musculus
SRR11425581_74533gene=Wdpcp	non-Kozak	m6A	non-6nt	IRES	Mus musculus
SRR11425581_74915gene=Hey1	non-Kozak	non-m6A	non-6nt	IRES	Mus musculus
SRR11425581_74989gene=H3f3b	non-Kozak	m6A	non-6nt	IRES	Mus musculus
SRR11425581_75042gene=Uri1	non-Kozak	non-m6A	non-6nt	IRES	Mus musculus
SRR11425581_75667gene=Top1	non-Kozak	m6A	non-6nt	IRES	Mus musculus
SRR11425581_75813gene=Rnf10	non-Kozak	m6A	non-6nt	IRES	Mus musculus
SRR11425581_75858gene=Canx	non-Kozak	non-m6A	non-6nt	IRES	Mus musculus
SRR11425581_76028gene=Atad1	non-Kozak	non-m6A	non-6nt	IRES	Mus musculus
SRR11425581_76222gene=Adap1	non-Kozak	m6A	non-6nt	IRES	Mus musculus
SRR11425581_76343gene=Mlip	non-Kozak	m6A	non-6nt	non-IRES	Mus musculus
SRR11425581_76389gene=Tnfrsf21	non-Kozak	m6A	non-6nt	non-IRES	Mus musculus
SRR11425581_77943gene=Rcor3	non-Kozak	m6A	non-6nt	IRES	Mus musculus
SRR11425581_78402gene=Coa8	non-Kozak	m6A	non-6nt	IRES	Mus musculus
SRR11425581_78448gene=Cry1	non-Kozak	non-m6A	non-6nt	IRES	Mus musculus
SRR11425581_78492gene=Slc41a2	non-Kozak	m6A	non-6nt	IRES	Mus musculus
SRR11425581_78831gene=Vrk1	non-Kozak	non-m6A	non-6nt	non-IRES	Mus musculus
SRR11425581_79170gene=Rnf103	non-Kozak	m6A	non-6nt	IRES	Mus musculus
SRR11425581_79180gene=Kdm4d	non-Kozak	m6A	non-6nt	IRES	Mus musculus
SRR11425581_79305gene=Il17ra	non-Kozak	m6A	non-6nt	IRES	Mus musculus
SRR11425581_79696gene=Zfp516	non-Kozak	m6A	non-6nt	non-IRES	Mus musculus
SRR11425581_79970gene=Arid4a	non-Kozak	non-m6A	non-6nt	IRES	Mus musculus
SRR11425581_80086gene=Zdhhc23	non-Kozak	m6A	non-6nt	IRES	Mus musculus
SRR11425581_80199gene=Fam186b	non-Kozak	non-m6A	non-6nt	non-IRES	Mus musculus
SRR11425581_80438gene=Trmt1	non-Kozak	m6A	non-6nt	IRES	Mus musculus
SRR11425581_80483gene=Mms22l	non-Kozak	m6A	non-6nt	IRES	Mus musculus
SRR11425581_80686gene=Rabgef1	non-Kozak	non-m6A	non-6nt	non-IRES	Mus musculus
SRR11425581_81147gene=Immt	non-Kozak	m6A	non-6nt	IRES	Mus musculus
SRR11425581_81414gene=Snap91	non-Kozak	non-m6A	non-6nt	IRES	Mus musculus
SRR11425581_81526gene=Macrod2	non-Kozak	m6A	non-6nt	IRES	Mus musculus
SRR11425581_81582gene=Arid2	non-Kozak	non-m6A	non-6nt	IRES	Mus musculus
SRR11425581_81727gene=Iqub	non-Kozak	non-m6A	non-6nt	IRES	Mus musculus
SRR11425581_8172gene=Igf1r	non-Kozak	m6A	non-6nt	non-IRES	Mus musculus
SRR11425581_81744gene=Lrfn5	non-Kozak	m6A	non-6nt	IRES	Mus musculus
SRR11425581_81754gene=Gm11855	non-Kozak	m6A	non-6nt	IRES	Mus musculus
SRR11425581_81769gene=Uap1	non-Kozak	m6A	non-6nt	IRES	Mus musculus
SRR11425581_82530gene=Hps3	non-Kozak	m6A	non-6nt	IRES	Mus musculus
SRR11425581_83095gene=Spred2	non-Kozak	m6A	non-6nt	IRES	Mus musculus
SRR11425581_83330gene=Btbd7	non-Kozak	non-m6A	non-6nt	IRES	Mus musculus
SRR11425581_83416gene=Ralyl	non-Kozak	non-m6A	non-6nt	IRES	Mus musculus
SRR11425581_84087gene=Rhot1	non-Kozak	m6A	non-6nt	IRES	Mus musculus
SRR11425581_84470gene=St13	non-Kozak	non-m6A	non-6nt	IRES	Mus musculus
SRR11425581_84986gene=Vps4a	non-Kozak	m6A	non-6nt	IRES	Mus musculus
SRR11425581_85154gene=Cep295	non-Kozak	m6A	non-6nt	IRES	Mus musculus
SRR11425581_85239gene=intergenic	non-Kozak	m6A	non-6nt	IRES	Mus musculus
SRR11425581_85305gene=Rsbn1l	non-Kozak	m6A	non-6nt	IRES	Mus musculus
SRR11425581_85876gene=Selenon	non-Kozak	m6A	non-6nt	IRES	Mus musculus
SRR11425581_86311gene=Arhgap26	non-Kozak	non-m6A	non-6nt	IRES	Mus musculus
SRR11425581_8651gene=Atp6v1c1	non-Kozak	non-m6A	non-6nt	IRES	Mus musculus
SRR11425581_86740gene=Cibar1	non-Kozak	m6A	non-6nt	IRES	Mus musculus
SRR11425581_86780gene=Atg7	non-Kozak	m6A	non-6nt	IRES	Mus musculus
SRR11425581_86955gene=Herc6	non-Kozak	non-m6A	non-6nt	IRES	Mus musculus
SRR11425581_86988gene=A930015D03Rik	non-Kozak	m6A	non-6nt	IRES	Mus musculus
SRR11425581_87049gene=Dcaf6	non-Kozak	m6A	non-6nt	IRES	Mus musculus
SRR11425581_87530gene=Plaa	non-Kozak	m6A	non-6nt	IRES	Mus musculus
SRR11425581_87603gene=Rars2	non-Kozak	m6A	non-6nt	non-IRES	Mus musculus
SRR11425581_87694gene=Gstcd	non-Kozak	m6A	non-6nt	IRES	Mus musculus
SRR11425581_87744gene=Golim4	non-Kozak	non-m6A	non-6nt	IRES	Mus musculus
SRR11425581_87769gene=Hs3st2	non-Kozak	m6A	non-6nt	IRES	Mus musculus
SRR11425581_87873gene=Kalrn	non-Kozak	m6A	non-6nt	IRES	Mus musculus
SRR11425581_87898gene=Efl1	non-Kozak	non-m6A	non-6nt	IRES	Mus musculus
SRR11425581_87977gene=Ccm2	non-Kozak	m6A	non-6nt	non-IRES	Mus musculus
SRR11425581_88201gene=Ptprd	non-Kozak	non-m6A	non-6nt	IRES	Mus musculus
SRR11425581_88344gene=Gxylt1	non-Kozak	m6A	non-6nt	IRES	Mus musculus
SRR11425581_88434gene=Tcf20	non-Kozak	m6A	non-6nt	IRES	Mus musculus
SRR11425581_88535gene=Zfp563	non-Kozak	m6A	non-6nt	IRES	Mus musculus
SRR11425581_8872gene=Rbpj	non-Kozak	m6A	non-6nt	IRES	Mus musculus
SRR11425581_89038gene=Zfp407	non-Kozak	m6A	non-6nt	IRES	Mus musculus
SRR11425581_89481gene=Rnf180	non-Kozak	m6A	non-6nt	non-IRES	Mus musculus
SRR11425581_89956gene=Nmd3	non-Kozak	m6A	non-6nt	IRES	Mus musculus
SRR11425581_90512gene=Clpx	non-Kozak	m6A	non-6nt	IRES	Mus musculus
SRR11425581_90997gene=Eif5a	non-Kozak	m6A	non-6nt	IRES	Mus musculus
SRR11425581_91154gene=Cycs	non-Kozak	m6A	non-6nt	IRES	Mus musculus
SRR11425581_91363gene=Ccdc25	non-Kozak	m6A	non-6nt	non-IRES	Mus musculus
SRR11425581_91615gene=Gcnt2	non-Kozak	m6A	non-6nt	IRES	Mus musculus
SRR11425581_91626gene=Rad17	non-Kozak	m6A	non-6nt	IRES	Mus musculus
SRR11425581_91657gene=Cwf19l2	non-Kozak	m6A	non-6nt	IRES	Mus musculus
SRR11425581_91774gene=Zfp418	non-Kozak	m6A	non-6nt	IRES	Mus musculus
SRR11425581_91854gene=Nudcd1	non-Kozak	m6A	non-6nt	IRES	Mus musculus
SRR11425581_92191gene=Grb2	non-Kozak	m6A	non-6nt	IRES	Mus musculus
SRR11425581_92902gene=Rbfox2	non-Kozak	non-m6A	non-6nt	IRES	Mus musculus
SRR11425581_92993gene=Mfsd2a	non-Kozak	non-m6A	non-6nt	IRES	Mus musculus
SRR11425581_93464gene=Tspyl2	non-Kozak	m6A	non-6nt	IRES	Mus musculus
SRR11425581_93551gene=Nfs1	non-Kozak	non-m6A	non-6nt	non-IRES	Mus musculus
SRR11425581_93763gene=Phf6	non-Kozak	m6A	non-6nt	IRES	Mus musculus
SRR11425581_93810gene=Trip11	non-Kozak	non-m6A	non-6nt	IRES	Mus musculus
SRR11425581_93846gene=Auh	non-Kozak	non-m6A	non-6nt	IRES	Mus musculus
SRR11425581_93971gene=Chrna5	non-Kozak	m6A	non-6nt	IRES	Mus musculus
SRR11425581_93978gene=Zbtb25	non-Kozak	m6A	non-6nt	IRES	Mus musculus
SRR11425581_94084gene=Fmn1	non-Kozak	non-m6A	non-6nt	IRES	Mus musculus
SRR11425581_94139gene=Cplane1	non-Kozak	m6A	non-6nt	IRES	Mus musculus
SRR11425581_94275gene=Ndufa8	non-Kozak	non-m6A	non-6nt	IRES	Mus musculus
SRR11425581_94494gene=Rcbtb2	non-Kozak	m6A	non-6nt	IRES	Mus musculus
SRR11425581_94577gene=B230303A05Rik	non-Kozak	non-m6A	non-6nt	IRES	Mus musculus
SRR11425581_95089gene=Sidt1	non-Kozak	non-m6A	non-6nt	IRES	Mus musculus
SRR11425581_95484gene=Hnrnpk	non-Kozak	non-m6A	non-6nt	IRES	Mus musculus
SRR11425581_95487gene=Mtrf1	non-Kozak	non-m6A	non-6nt	IRES	Mus musculus
SRR11425581_95610gene=Leo1	non-Kozak	m6A	non-6nt	non-IRES	Mus musculus
SRR11425581_95891gene=Nrxn3	non-Kozak	non-m6A	non-6nt	IRES	Mus musculus
SRR11425581_95908gene=Gls2	non-Kozak	m6A	non-6nt	non-IRES	Mus musculus
SRR11425581_96008gene=Gabpb1	non-Kozak	non-m6A	non-6nt	IRES	Mus musculus
SRR11425581_96208gene=Sfi1	non-Kozak	m6A	non-6nt	IRES	Mus musculus
SRR11425581_96435gene=Huwe1	non-Kozak	m6A	non-6nt	IRES	Mus musculus
SRR11425581_96904gene=Tspan18	non-Kozak	non-m6A	non-6nt	IRES	Mus musculus
SRR11425581_97292gene=Zmym1	non-Kozak	m6A	non-6nt	IRES	Mus musculus
SRR11425581_97360gene=Serinc3	non-Kozak	m6A	non-6nt	IRES	Mus musculus
SRR11425581_97537gene=Slc8b1	non-Kozak	non-m6A	non-6nt	non-IRES	Mus musculus
SRR11425581_97723gene=Fut8	non-Kozak	m6A	non-6nt	IRES	Mus musculus
SRR11425581_97976gene=Ccnb2	non-Kozak	non-m6A	non-6nt	non-IRES	Mus musculus
SRR11425581_98170gene=Enah	non-Kozak	non-m6A	non-6nt	IRES	Mus musculus
SRR11425581_98212gene=Ptpn2	non-Kozak	m6A	non-6nt	IRES	Mus musculus
SRR11425581_98556gene=Enox2	non-Kozak	non-m6A	non-6nt	IRES	Mus musculus
SRR11425581_98920gene=Spindoc	non-Kozak	m6A	non-6nt	IRES	Mus musculus
SRR11425581_98994gene=Dpysl2	non-Kozak	m6A	non-6nt	IRES	Mus musculus
SRR11425581_99125gene=Vezf1	non-Kozak	m6A	non-6nt	non-IRES	Mus musculus
SRR11425582_100469gene=Nmd3	non-Kozak	m6A	non-6nt	IRES	Mus musculus
SRR11425582_100542gene=Sfmbt2	non-Kozak	m6A	non-6nt	IRES	Mus musculus
SRR11425582_100681gene=Farp1	non-Kozak	m6A	non-6nt	IRES	Mus musculus
SRR11425582_100804gene=Zbtb10	non-Kozak	m6A	non-6nt	non-IRES	Mus musculus
SRR11425582_101162gene=Nufip1	non-Kozak	m6A	non-6nt	IRES	Mus musculus
SRR11425582_101587gene=Adgrl2	non-Kozak	non-m6A	non-6nt	IRES	Mus musculus
SRR11425582_101727gene=Ssr3	non-Kozak	m6A	non-6nt	IRES	Mus musculus
SRR11425582_101734gene=Iars	non-Kozak	m6A	non-6nt	IRES	Mus musculus
SRR11425582_101914gene=Plgrkt	non-Kozak	m6A	non-6nt	IRES	Mus musculus
SRR11425582_101987gene=Sptbn1	non-Kozak	m6A	non-6nt	IRES	Mus musculus
SRR11425582_102427gene=Rsph3b	non-Kozak	non-m6A	non-6nt	non-IRES	Mus musculus
SRR11425582_102447gene=Wdr11	non-Kozak	non-m6A	non-6nt	IRES	Mus musculus
SRR11425582_102735gene=Slc38a2	non-Kozak	non-m6A	non-6nt	IRES	Mus musculus
SRR11425582_102908gene=Thumpd1	non-Kozak	non-m6A	non-6nt	IRES	Mus musculus
SRR11425582_104183gene=Celf1	non-Kozak	m6A	non-6nt	IRES	Mus musculus
SRR11425582_104700gene=Hnrnph3	non-Kozak	non-m6A	non-6nt	IRES	Mus musculus
SRR11425582_104810gene=Ufsp2	non-Kozak	m6A	non-6nt	IRES	Mus musculus
SRR11425582_105331gene=Uchl3	non-Kozak	non-m6A	non-6nt	IRES	Mus musculus
SRR11425582_105394gene=Ccdc138	non-Kozak	m6A	non-6nt	IRES	Mus musculus
SRR11425582_105869gene=Hmgb1	non-Kozak	m6A	non-6nt	IRES	Mus musculus
SRR11425582_105965gene=Cntnap4	non-Kozak	m6A	non-6nt	IRES	Mus musculus
SRR11425582_106122gene=Mid2	non-Kozak	non-m6A	non-6nt	IRES	Mus musculus
SRR11425582_106522gene=Cramp1l	non-Kozak	m6A	non-6nt	IRES	Mus musculus
SRR11425582_107154gene=Nfkbib	non-Kozak	non-m6A	non-6nt	non-IRES	Mus musculus
SRR11425582_107279gene=Pold3	non-Kozak	non-m6A	non-6nt	IRES	Mus musculus
SRR11425582_107307gene=Ik	non-Kozak	m6A	non-6nt	non-IRES	Mus musculus
SRR11425582_107410gene=Gins4	non-Kozak	m6A	non-6nt	non-IRES	Mus musculus
SRR11425582_107831gene=Rasgrf1	non-Kozak	non-m6A	non-6nt	IRES	Mus musculus
SRR11425582_108137gene=Pus10	non-Kozak	non-m6A	non-6nt	IRES	Mus musculus
SRR11425582_108193gene=Harbi1	non-Kozak	m6A	non-6nt	non-IRES	Mus musculus
SRR11425582_108377gene=Uevld	non-Kozak	m6A	non-6nt	IRES	Mus musculus
SRR11425582_108571gene=Ankrd26	non-Kozak	non-m6A	non-6nt	IRES	Mus musculus
SRR11425582_108591gene=Fbxo45	non-Kozak	non-m6A	non-6nt	IRES	Mus musculus
SRR11425582_108600gene=Rp2	non-Kozak	m6A	non-6nt	IRES	Mus musculus
SRR11425582_10914gene=Pfkp	non-Kozak	m6A	non-6nt	IRES	Mus musculus
SRR11425582_10938gene=Lncpint	non-Kozak	m6A	non-6nt	IRES	Mus musculus
SRR11425582_109572gene=Eif3a	non-Kozak	m6A	non-6nt	IRES	Mus musculus
SRR11425582_109579gene=Hnrnpll	non-Kozak	m6A	non-6nt	IRES	Mus musculus
SRR11425582_109714gene=Lsamp	non-Kozak	non-m6A	non-6nt	IRES	Mus musculus
SRR11425582_110158gene=Aldh1l2	non-Kozak	non-m6A	non-6nt	IRES	Mus musculus
SRR11425582_110434gene=Pfkp	non-Kozak	non-m6A	non-6nt	IRES	Mus musculus
SRR11425582_110480gene=Pls3	non-Kozak	non-m6A	non-6nt	IRES	Mus musculus
SRR11425582_110995gene=Hhat	non-Kozak	non-m6A	non-6nt	non-IRES	Mus musculus
SRR11425582_112154gene=Dars2	non-Kozak	m6A	non-6nt	IRES	Mus musculus
SRR11425582_112466gene=Rorb	non-Kozak	m6A	non-6nt	IRES	Mus musculus
SRR11425582_11258gene=Sipa1l1	non-Kozak	m6A	non-6nt	IRES	Mus musculus
SRR11425582_112652gene=Tmtc2	non-Kozak	non-m6A	non-6nt	IRES	Mus musculus
SRR11425582_113031gene=Add1	non-Kozak	m6A	non-6nt	IRES	Mus musculus
SRR11425582_113045gene=Dusp16	non-Kozak	m6A	non-6nt	IRES	Mus musculus
SRR11425582_113088gene=Scfd1	non-Kozak	non-m6A	non-6nt	IRES	Mus musculus
SRR11425582_113573gene=Zfp580	non-Kozak	non-m6A	non-6nt	IRES	Mus musculus
SRR11425582_113903gene=Kdm1b	non-Kozak	m6A	non-6nt	non-IRES	Mus musculus
SRR11425582_114211gene=Akr1a1	non-Kozak	m6A	non-6nt	IRES	Mus musculus
SRR11425582_114249gene=Sppl3	non-Kozak	m6A	non-6nt	IRES	Mus musculus
SRR11425582_114631gene=Naa35	non-Kozak	non-m6A	non-6nt	IRES	Mus musculus
SRR11425582_114756gene=Emg1	non-Kozak	m6A	non-6nt	IRES	Mus musculus
SRR11425582_114801gene=Wrap53	non-Kozak	non-m6A	non-6nt	IRES	Mus musculus
SRR11425582_114954gene=Gtf3c1	non-Kozak	non-m6A	non-6nt	non-IRES	Mus musculus
SRR11425582_115111gene=Rab14	non-Kozak	non-m6A	non-6nt	IRES	Mus musculus
SRR11425582_115285gene=intergenic	non-Kozak	m6A	non-6nt	IRES	Mus musculus
SRR11425582_115575gene=Rad18	non-Kozak	non-m6A	non-6nt	IRES	Mus musculus
SRR11425582_115634gene=Adh5	non-Kozak	m6A	non-6nt	IRES	Mus musculus
SRR11425582_115845gene=Gabpa	non-Kozak	m6A	non-6nt	non-IRES	Mus musculus
SRR11425582_115967gene=9530077C05Rik	non-Kozak	m6A	non-6nt	IRES	Mus musculus
SRR11425582_116100gene=Hprt	non-Kozak	m6A	non-6nt	IRES	Mus musculus
SRR11425582_116223gene=Wdr12	non-Kozak	non-m6A	non-6nt	IRES	Mus musculus
SRR11425582_116387gene=Fbxw7	non-Kozak	non-m6A	non-6nt	IRES	Mus musculus
SRR11425582_116441gene=Cenpk	non-Kozak	m6A	non-6nt	IRES	Mus musculus
SRR11425582_116801gene=Hmgcll1	non-Kozak	m6A	non-6nt	IRES	Mus musculus
SRR11425582_116919gene=Mrps23	non-Kozak	non-m6A	non-6nt	non-IRES	Mus musculus
SRR11425582_116928gene=Atad2b	non-Kozak	non-m6A	non-6nt	non-IRES	Mus musculus
SRR11425582_117451gene=Poc1b	non-Kozak	m6A	non-6nt	IRES	Mus musculus
SRR11425582_118249gene=Vta1	non-Kozak	non-m6A	non-6nt	IRES	Mus musculus
SRR11425582_118256gene=Polh	non-Kozak	m6A	non-6nt	IRES	Mus musculus
SRR11425582_118329gene=Ror1	non-Kozak	m6A	non-6nt	non-IRES	Mus musculus
SRR11425582_118344gene=Strbp	non-Kozak	non-m6A	non-6nt	IRES	Mus musculus
SRR11425582_118891gene=Ireb2	non-Kozak	non-m6A	non-6nt	IRES	Mus musculus
SRR11425582_119240gene=Pigx	non-Kozak	m6A	non-6nt	IRES	Mus musculus
SRR11425582_119444gene=Mdh2	non-Kozak	non-m6A	non-6nt	IRES	Mus musculus
SRR11425582_119483gene=Rps9	non-Kozak	non-m6A	non-6nt	IRES	Mus musculus
SRR11425582_119555gene=Fam98b	non-Kozak	m6A	non-6nt	IRES	Mus musculus
SRR11425582_119731gene=Ubxn4	non-Kozak	non-m6A	non-6nt	IRES	Mus musculus
SRR11425582_119871gene=Ptar1	non-Kozak	m6A	non-6nt	IRES	Mus musculus
SRR11425582_119989gene=Ppme1	non-Kozak	m6A	non-6nt	IRES	Mus musculus
SRR11425582_120713gene=Nr2f2	non-Kozak	m6A	non-6nt	non-IRES	Mus musculus
SRR11425582_121180gene=Col4a1	non-Kozak	m6A	non-6nt	IRES	Mus musculus
SRR11425582_121697gene=Cct8	non-Kozak	m6A	non-6nt	IRES	Mus musculus
SRR11425582_122423gene=Ddx24	non-Kozak	m6A	non-6nt	IRES	Mus musculus
SRR11425582_122494gene=Rint1	non-Kozak	non-m6A	non-6nt	IRES	Mus musculus
SRR11425582_122670gene=Metap2	non-Kozak	m6A	non-6nt	non-IRES	Mus musculus
SRR11425582_122799gene=Lrch3	non-Kozak	m6A	non-6nt	IRES	Mus musculus
SRR11425582_123104gene=Pde1c	non-Kozak	non-m6A	non-6nt	IRES	Mus musculus
SRR11425582_123197gene=Plpp1	non-Kozak	m6A	non-6nt	IRES	Mus musculus
SRR11425582_123241gene=Gm39326	non-Kozak	m6A	non-6nt	IRES	Mus musculus
SRR11425582_123325gene=Zfp532	non-Kozak	m6A	non-6nt	IRES	Mus musculus
SRR11425582_123340gene=Ddx6	non-Kozak	m6A	non-6nt	IRES	Mus musculus
SRR11425582_123526gene=Rcc1l	non-Kozak	m6A	non-6nt	IRES	Mus musculus
SRR11425582_124336gene=Gmfb	non-Kozak	m6A	non-6nt	IRES	Mus musculus
SRR11425582_124527gene=Bckdhb	non-Kozak	non-m6A	non-6nt	IRES	Mus musculus
SRR11425582_125044gene=Uqcrfs1	non-Kozak	non-m6A	non-6nt	IRES	Mus musculus
SRR11425582_125108gene=Dffa	non-Kozak	non-m6A	non-6nt	IRES	Mus musculus
SRR11425582_125302gene=Etfa	non-Kozak	non-m6A	non-6nt	IRES	Mus musculus
SRR11425582_125357gene=Clasp2	non-Kozak	m6A	non-6nt	IRES	Mus musculus
SRR11425582_125486gene=Palb2	non-Kozak	non-m6A	non-6nt	IRES	Mus musculus
SRR11425582_125522gene=Zfp512b	non-Kozak	m6A	non-6nt	IRES	Mus musculus
SRR11425582_125570gene=Smyd3	non-Kozak	m6A	non-6nt	IRES	Mus musculus
SRR11425582_125732gene=Patl1	non-Kozak	non-m6A	non-6nt	non-IRES	Mus musculus
SRR11425582_126136gene=Rp9	non-Kozak	non-m6A	non-6nt	IRES	Mus musculus
SRR11425582_126254gene=Trmt2b	non-Kozak	m6A	non-6nt	IRES	Mus musculus
SRR11425582_126488gene=Rxylt1	non-Kozak	non-m6A	non-6nt	IRES	Mus musculus
SRR11425582_126584gene=Mrps31	non-Kozak	m6A	non-6nt	IRES	Mus musculus
SRR11425582_126727gene=Dhrsx	non-Kozak	non-m6A	non-6nt	non-IRES	Mus musculus
SRR11425582_126769gene=Dusp6	non-Kozak	non-m6A	non-6nt	IRES	Mus musculus
SRR11425582_12682gene=4932438A13Rik	non-Kozak	non-m6A	non-6nt	IRES	Mus musculus
SRR11425582_126873gene=Hnrnpa1	non-Kozak	m6A	non-6nt	IRES	Mus musculus
SRR11425582_126878gene=Macf1	non-Kozak	m6A	non-6nt	IRES	Mus musculus
SRR11425582_126993gene=Letm2	non-Kozak	m6A	non-6nt	IRES	Mus musculus
SRR11425582_127262gene=Diaph3	non-Kozak	non-m6A	non-6nt	IRES	Mus musculus
SRR11425582_127487gene=Fbxo8	non-Kozak	m6A	non-6nt	IRES	Mus musculus
SRR11425582_127507gene=Lmnb1	non-Kozak	m6A	non-6nt	non-IRES	Mus musculus
SRR11425582_127951gene=Dtx3l	non-Kozak	m6A	non-6nt	IRES	Mus musculus
SRR11425582_128138gene=Katnal1	non-Kozak	m6A	non-6nt	IRES	Mus musculus
SRR11425582_128352gene=Atf1	non-Kozak	m6A	non-6nt	IRES	Mus musculus
SRR11425582_128843gene=Lbr	non-Kozak	m6A	non-6nt	IRES	Mus musculus
SRR11425582_128983gene=Haus6	non-Kozak	m6A	non-6nt	IRES	Mus musculus
SRR11425582_129183gene=Ccar1	non-Kozak	non-m6A	non-6nt	IRES	Mus musculus
SRR11425582_129533gene=Fnbp4	non-Kozak	m6A	non-6nt	IRES	Mus musculus
SRR11425582_129824gene=Clpx	non-Kozak	m6A	non-6nt	IRES	Mus musculus
SRR11425582_129920gene=Cdk4	non-Kozak	m6A	non-6nt	IRES	Mus musculus
SRR11425582_130482gene=Ppa2	non-Kozak	non-m6A	non-6nt	IRES	Mus musculus
SRR11425582_130744gene=Asap1	non-Kozak	m6A	non-6nt	IRES	Mus musculus
SRR11425582_131064gene=Thyn1	non-Kozak	non-m6A	non-6nt	IRES	Mus musculus
SRR11425582_131282gene=intergenic	non-Kozak	non-m6A	non-6nt	IRES	Mus musculus
SRR11425582_131503gene=Hirip3	non-Kozak	non-m6A	non-6nt	non-IRES	Mus musculus
SRR11425582_132603gene=Unc79	non-Kozak	non-m6A	non-6nt	IRES	Mus musculus
SRR11425582_132883gene=Alg3	non-Kozak	non-m6A	non-6nt	non-IRES	Mus musculus
SRR11425582_133526gene=Zfp385b	non-Kozak	non-m6A	non-6nt	non-IRES	Mus musculus
SRR11425582_134007gene=Mpdz	non-Kozak	m6A	non-6nt	IRES	Mus musculus
SRR11425582_134080gene=Srcap	non-Kozak	non-m6A	non-6nt	IRES	Mus musculus
SRR11425582_134220gene=intergenic	non-Kozak	m6A	non-6nt	IRES	Mus musculus
SRR11425582_134239gene=Spata19	non-Kozak	m6A	non-6nt	non-IRES	Mus musculus
SRR11425582_13436gene=Kmt2c	non-Kozak	non-m6A	non-6nt	IRES	Mus musculus
SRR11425582_134398gene=Kdm5b	non-Kozak	non-m6A	non-6nt	IRES	Mus musculus
SRR11425582_134485gene=Kdm5a	non-Kozak	m6A	non-6nt	IRES	Mus musculus
SRR11425582_134656gene=Skap2	non-Kozak	non-m6A	non-6nt	IRES	Mus musculus
SRR11425582_135066gene=Syt17	non-Kozak	non-m6A	non-6nt	IRES	Mus musculus
SRR11425582_135151gene=intergenic	non-Kozak	m6A	non-6nt	IRES	Mus musculus
SRR11425582_135208gene=Srsf12	non-Kozak	non-m6A	non-6nt	IRES	Mus musculus
SRR11425582_13529gene=Hmbox1	non-Kozak	m6A	non-6nt	IRES	Mus musculus
SRR11425582_135356gene=Ostf1	non-Kozak	non-m6A	non-6nt	IRES	Mus musculus
SRR11425582_135391gene=Rpl7	non-Kozak	non-m6A	non-6nt	IRES	Mus musculus
SRR11425582_135540gene=Extl1	non-Kozak	m6A	non-6nt	IRES	Mus musculus
SRR11425582_135669gene=Pou6f2	non-Kozak	non-m6A	non-6nt	non-IRES	Mus musculus
SRR11425582_135857gene=Tecpr1	non-Kozak	non-m6A	non-6nt	non-IRES	Mus musculus
SRR11425582_136053gene=Spg20	non-Kozak	m6A	non-6nt	IRES	Mus musculus
SRR11425582_136061gene=Gpr180	non-Kozak	m6A	non-6nt	IRES	Mus musculus
SRR11425582_136093gene=Tent2	non-Kozak	m6A	non-6nt	IRES	Mus musculus
SRR11425582_136140gene=Anp32b	non-Kozak	non-m6A	non-6nt	IRES	Mus musculus
SRR11425582_136576gene=Gm26618	non-Kozak	non-m6A	non-6nt	IRES	Mus musculus
SRR11425582_136753gene=Togaram2	non-Kozak	m6A	non-6nt	non-IRES	Mus musculus
SRR11425582_137848gene=Lrrc42	non-Kozak	m6A	non-6nt	IRES	Mus musculus
SRR11425582_137953gene=Fggy	non-Kozak	non-m6A	non-6nt	non-IRES	Mus musculus
SRR11425582_138423gene=Stag1	non-Kozak	non-m6A	non-6nt	IRES	Mus musculus
SRR11425582_138443gene=Blvra	non-Kozak	m6A	non-6nt	IRES	Mus musculus
SRR11425582_138772gene=Arrdc1	non-Kozak	m6A	non-6nt	IRES	Mus musculus
SRR11425582_138824gene=Gk5	non-Kozak	non-m6A	non-6nt	IRES	Mus musculus
SRR11425582_138993gene=Pitpnc1	non-Kozak	non-m6A	non-6nt	IRES	Mus musculus
SRR11425582_139054gene=Dera	non-Kozak	non-m6A	non-6nt	IRES	Mus musculus
SRR11425582_139150gene=Apmap	non-Kozak	non-m6A	non-6nt	IRES	Mus musculus
SRR11425582_139158gene=Rbm39	non-Kozak	non-m6A	non-6nt	IRES	Mus musculus
SRR11425582_139392gene=Gm33210	non-Kozak	m6A	non-6nt	non-IRES	Mus musculus
SRR11425582_139982gene=Gusb	non-Kozak	non-m6A	non-6nt	IRES	Mus musculus
SRR11425582_140577gene=Sntg1	non-Kozak	non-m6A	non-6nt	IRES	Mus musculus
SRR11425582_140600gene=Tspan3	non-Kozak	m6A	non-6nt	IRES	Mus musculus
SRR11425582_140906gene=Cenpu	non-Kozak	non-m6A	non-6nt	non-IRES	Mus musculus
SRR11425582_140925gene=Zfp646	non-Kozak	m6A	non-6nt	IRES	Mus musculus
SRR11425582_141073gene=Ube2e3	non-Kozak	m6A	non-6nt	IRES	Mus musculus
SRR11425582_141119gene=Acox1	non-Kozak	non-m6A	non-6nt	IRES	Mus musculus
SRR11425582_141133gene=Clasp2	non-Kozak	non-m6A	non-6nt	IRES	Mus musculus
SRR11425582_141262gene=Cnot2	non-Kozak	m6A	non-6nt	IRES	Mus musculus
SRR11425582_141311gene=Mettl16	non-Kozak	m6A	non-6nt	IRES	Mus musculus
SRR11425582_141513gene=Ints6	non-Kozak	non-m6A	non-6nt	IRES	Mus musculus
SRR11425582_141554gene=Nktr	non-Kozak	non-m6A	non-6nt	IRES	Mus musculus
SRR11425582_141579gene=Map3k2	non-Kozak	non-m6A	non-6nt	non-IRES	Mus musculus
SRR11425582_141657gene=Dennd1a	non-Kozak	m6A	non-6nt	IRES	Mus musculus
SRR11425582_141661gene=Ecpas	non-Kozak	m6A	non-6nt	IRES	Mus musculus
SRR11425582_141776gene=Grin2a	non-Kozak	non-m6A	non-6nt	IRES	Mus musculus
SRR11425582_141829gene=Cstf2	non-Kozak	non-m6A	non-6nt	IRES	Mus musculus
SRR11425582_141939gene=Cnksr3	non-Kozak	non-m6A	non-6nt	IRES	Mus musculus
SRR11425582_141955gene=Zfr	non-Kozak	non-m6A	non-6nt	IRES	Mus musculus
SRR11425582_142245gene=Klhl8	non-Kozak	m6A	non-6nt	IRES	Mus musculus
SRR11425582_142278gene=Psph	non-Kozak	m6A	non-6nt	non-IRES	Mus musculus
SRR11425582_142462gene=Ncoa6	non-Kozak	non-m6A	non-6nt	IRES	Mus musculus
SRR11425582_142527gene=Acsbg1	non-Kozak	non-m6A	non-6nt	IRES	Mus musculus
SRR11425582_142616gene=Rpl7a	non-Kozak	m6A	non-6nt	IRES	Mus musculus
SRR11425582_142787gene=Aldh5a1	non-Kozak	non-m6A	non-6nt	IRES	Mus musculus
SRR11425582_143026gene=Ivns1abp	non-Kozak	m6A	non-6nt	IRES	Mus musculus
SRR11425582_143031gene=Cdh6	non-Kozak	m6A	non-6nt	IRES	Mus musculus
SRR11425582_143217gene=Utp11	non-Kozak	non-m6A	non-6nt	IRES	Mus musculus
SRR11425582_143238gene=Rps25	non-Kozak	non-m6A	non-6nt	non-IRES	Mus musculus
SRR11425582_143641gene=Rcan1	non-Kozak	non-m6A	non-6nt	IRES	Mus musculus
SRR11425582_143651gene=Plgrkt	non-Kozak	non-m6A	non-6nt	IRES	Mus musculus
SRR11425582_143757gene=Maea	non-Kozak	non-m6A	non-6nt	IRES	Mus musculus
SRR11425582_143825gene=Ndufaf6	non-Kozak	m6A	non-6nt	non-IRES	Mus musculus
SRR11425582_143840gene=Sik3	non-Kozak	non-m6A	non-6nt	IRES	Mus musculus
SRR11425582_143932gene=Usp14	non-Kozak	non-m6A	non-6nt	IRES	Mus musculus
SRR11425582_144013gene=Caap1	non-Kozak	m6A	non-6nt	IRES	Mus musculus
SRR11425582_144044gene=Daam2	non-Kozak	m6A	non-6nt	IRES	Mus musculus
SRR11425582_144257gene=Unk	non-Kozak	non-m6A	non-6nt	IRES	Mus musculus
SRR11425582_144366gene=Pip4p2	non-Kozak	m6A	non-6nt	non-IRES	Mus musculus
SRR11425582_144443gene=Gas5	non-Kozak	non-m6A	non-6nt	IRES	Mus musculus
SRR11425582_144454gene=Mak16	non-Kozak	non-m6A	non-6nt	IRES	Mus musculus
SRR11425582_144534gene=Sorbs2	non-Kozak	non-m6A	non-6nt	IRES	Mus musculus
SRR11425582_144817gene=Map3k7	non-Kozak	non-m6A	non-6nt	non-IRES	Mus musculus
SRR11425582_145070gene=Ptprb	non-Kozak	non-m6A	non-6nt	IRES	Mus musculus
SRR11425582_145336gene=Usp34	non-Kozak	m6A	non-6nt	IRES	Mus musculus
SRR11425582_145430gene=Magi2	non-Kozak	m6A	non-6nt	IRES	Mus musculus
SRR11425582_145443gene=Ksr1	non-Kozak	non-m6A	non-6nt	IRES	Mus musculus
SRR11425582_145479gene=Skil	non-Kozak	m6A	non-6nt	IRES	Mus musculus
SRR11425582_145498gene=Edil3	non-Kozak	non-m6A	non-6nt	IRES	Mus musculus
SRR11425582_145956gene=Eif2a	non-Kozak	non-m6A	non-6nt	IRES	Mus musculus
SRR11425582_146057gene=Wdr37	non-Kozak	m6A	non-6nt	IRES	Mus musculus
SRR11425582_146331gene=Tpt1	non-Kozak	m6A	non-6nt	IRES	Mus musculus
SRR11425582_146364gene=Pan3	non-Kozak	non-m6A	non-6nt	IRES	Mus musculus
SRR11425582_146507gene=Msrb3	non-Kozak	non-m6A	non-6nt	IRES	Mus musculus
SRR11425582_146933gene=Bphl	non-Kozak	m6A	non-6nt	IRES	Mus musculus
SRR11425582_146938gene=St6galnac3	non-Kozak	non-m6A	non-6nt	IRES	Mus musculus
SRR11425582_147027gene=Nmnat2	non-Kozak	non-m6A	non-6nt	IRES	Mus musculus
SRR11425582_147099gene=intergenic	non-Kozak	non-m6A	non-6nt	IRES	Mus musculus
SRR11425582_147409gene=Nfyb	non-Kozak	m6A	non-6nt	non-IRES	Mus musculus
SRR11425582_147429gene=Syne1	non-Kozak	m6A	non-6nt	IRES	Mus musculus
SRR11425582_147521gene=Bbs4	non-Kozak	m6A	non-6nt	IRES	Mus musculus
SRR11425582_147841gene=Trmt10a	non-Kozak	m6A	non-6nt	IRES	Mus musculus
SRR11425582_147981gene=Mrps35	non-Kozak	m6A	non-6nt	IRES	Mus musculus
SRR11425582_148113gene=Znrf1	non-Kozak	non-m6A	non-6nt	IRES	Mus musculus
SRR11425582_148254gene=Fastkd2	non-Kozak	non-m6A	non-6nt	IRES	Mus musculus
SRR11425582_148565gene=Dcaf6	non-Kozak	non-m6A	non-6nt	IRES	Mus musculus
SRR11425582_149029gene=Xkr4	non-Kozak	m6A	non-6nt	IRES	Mus musculus
SRR11425582_149045gene=Homer1	non-Kozak	non-m6A	non-6nt	IRES	Mus musculus
SRR11425582_149059gene=Zfp407	non-Kozak	non-m6A	non-6nt	IRES	Mus musculus
SRR11425582_149223gene=Mrps33	non-Kozak	non-m6A	non-6nt	IRES	Mus musculus
SRR11425582_149645gene=Robo2	non-Kozak	non-m6A	non-6nt	IRES	Mus musculus
SRR11425582_149874gene=Eif4a3	non-Kozak	m6A	non-6nt	non-IRES	Mus musculus
SRR11425582_149910gene=Cnot4	non-Kozak	m6A	non-6nt	IRES	Mus musculus
SRR11425582_149968gene=Tmpo	non-Kozak	non-m6A	non-6nt	IRES	Mus musculus
SRR11425582_14996gene=Rock2	non-Kozak	m6A	non-6nt	IRES	Mus musculus
SRR11425582_150013gene=Mri1	non-Kozak	m6A	non-6nt	IRES	Mus musculus
SRR11425582_150128gene=Fbxo3	non-Kozak	m6A	non-6nt	IRES	Mus musculus
SRR11425582_150162gene=Zfp330	non-Kozak	non-m6A	non-6nt	IRES	Mus musculus
SRR11425582_150314gene=Dgke	non-Kozak	non-m6A	non-6nt	IRES	Mus musculus
SRR11425582_150341gene=Etfb	non-Kozak	non-m6A	non-6nt	IRES	Mus musculus
SRR11425582_150414gene=Tnrc6a	non-Kozak	m6A	non-6nt	IRES	Mus musculus
SRR11425582_150476gene=Cdc14a	non-Kozak	non-m6A	non-6nt	IRES	Mus musculus
SRR11425582_150513gene=Arrb2	non-Kozak	non-m6A	non-6nt	IRES	Mus musculus
SRR11425582_150720gene=Tnk2	non-Kozak	m6A	non-6nt	IRES	Mus musculus
SRR11425582_151087gene=Nars	non-Kozak	m6A	non-6nt	IRES	Mus musculus
SRR11425582_151384gene=Skp1	non-Kozak	non-m6A	non-6nt	IRES	Mus musculus
SRR11425582_151641gene=Cdin1	non-Kozak	m6A	non-6nt	IRES	Mus musculus
SRR11425582_151922gene=Eed	non-Kozak	non-m6A	non-6nt	IRES	Mus musculus
SRR11425582_152030gene=Rplp1	non-Kozak	non-m6A	non-6nt	IRES	Mus musculus
SRR11425582_153064gene=Phf3	non-Kozak	non-m6A	non-6nt	IRES	Mus musculus
SRR11425582_153449gene=Nipsnap2	non-Kozak	non-m6A	non-6nt	IRES	Mus musculus
SRR11425582_153514gene=Mtcl1	non-Kozak	m6A	non-6nt	IRES	Mus musculus
SRR11425582_153829gene=Pym1	non-Kozak	non-m6A	non-6nt	IRES	Mus musculus
SRR11425582_153952gene=intergenic	non-Kozak	non-m6A	non-6nt	IRES	Mus musculus
SRR11425582_154349gene=Zc3h4	non-Kozak	m6A	non-6nt	non-IRES	Mus musculus
SRR11425582_154435gene=Nme7	non-Kozak	non-m6A	non-6nt	non-IRES	Mus musculus
SRR11425582_154570gene=Ints8	non-Kozak	non-m6A	non-6nt	IRES	Mus musculus
SRR11425582_154637gene=Stk40	non-Kozak	non-m6A	non-6nt	IRES	Mus musculus
SRR11425582_155567gene=Dgkb	non-Kozak	non-m6A	non-6nt	IRES	Mus musculus
SRR11425582_155591gene=Gls	non-Kozak	m6A	non-6nt	IRES	Mus musculus
SRR11425582_155918gene=Slc35d1	non-Kozak	m6A	non-6nt	IRES	Mus musculus
SRR11425582_156200gene=Bnc2	non-Kozak	non-m6A	non-6nt	IRES	Mus musculus
SRR11425582_156376gene=Rrp9	non-Kozak	non-m6A	non-6nt	IRES	Mus musculus
SRR11425582_156608gene=Gm14061	non-Kozak	non-m6A	non-6nt	IRES	Mus musculus
SRR11425582_156667gene=Cdc14b	non-Kozak	non-m6A	non-6nt	non-IRES	Mus musculus
SRR11425582_156785gene=H2-Ke6	non-Kozak	non-m6A	non-6nt	non-IRES	Mus musculus
SRR11425582_15724gene=Gabrb2	non-Kozak	non-m6A	non-6nt	IRES	Mus musculus
SRR11425582_157294gene=Scaf8	non-Kozak	non-m6A	non-6nt	IRES	Mus musculus
SRR11425582_157659gene=Ybx3	non-Kozak	non-m6A	non-6nt	IRES	Mus musculus
SRR11425582_157836gene=Zfp958	non-Kozak	non-m6A	non-6nt	IRES	Mus musculus
SRR11425582_157966gene=Aldh16a1	non-Kozak	non-m6A	non-6nt	non-IRES	Mus musculus
SRR11425582_158120gene=Sem1	non-Kozak	non-m6A	non-6nt	non-IRES	Mus musculus
SRR11425582_158523gene=Pola1	non-Kozak	non-m6A	non-6nt	non-IRES	Mus musculus
SRR11425582_158868gene=Camta1	non-Kozak	non-m6A	non-6nt	non-IRES	Mus musculus
SRR11425582_158900gene=Ppp2r5a	non-Kozak	non-m6A	non-6nt	IRES	Mus musculus
SRR11425582_159874gene=Sfmbt2	non-Kozak	non-m6A	non-6nt	IRES	Mus musculus
SRR11425582_160032gene=Thrb	non-Kozak	non-m6A	non-6nt	IRES	Mus musculus
SRR11425582_160193gene=Ptprg	non-Kozak	non-m6A	non-6nt	IRES	Mus musculus
SRR11425582_160419gene=Med13l	non-Kozak	non-m6A	non-6nt	IRES	Mus musculus
SRR11425582_160760gene=Zfp182	non-Kozak	non-m6A	non-6nt	IRES	Mus musculus
SRR11425582_161078gene=Mrps18b	non-Kozak	non-m6A	non-6nt	IRES	Mus musculus
SRR11425582_161345gene=Tmem231	non-Kozak	m6A	non-6nt	IRES	Mus musculus
SRR11425582_161370gene=Smc6	non-Kozak	non-m6A	non-6nt	IRES	Mus musculus
SRR11425582_161798gene=Celf2	non-Kozak	non-m6A	non-6nt	IRES	Mus musculus
SRR11425582_162066gene=Pnpo	non-Kozak	non-m6A	non-6nt	IRES	Mus musculus
SRR11425582_162697gene=Eya3	non-Kozak	non-m6A	non-6nt	IRES	Mus musculus
SRR11425582_163238gene=Mrps36	non-Kozak	non-m6A	non-6nt	IRES	Mus musculus
SRR11425582_164372gene=Mrfap1	non-Kozak	non-m6A	non-6nt	non-IRES	Mus musculus
SRR11425582_164385gene=Vars	non-Kozak	m6A	non-6nt	IRES	Mus musculus
SRR11425582_164451gene=Cerk	non-Kozak	non-m6A	non-6nt	IRES	Mus musculus
SRR11425582_164895gene=Ifrd2	non-Kozak	non-m6A	non-6nt	IRES	Mus musculus
SRR11425582_164936gene=Gnl3l	non-Kozak	non-m6A	non-6nt	IRES	Mus musculus
SRR11425582_165952gene=Rpl7a	non-Kozak	non-m6A	non-6nt	IRES	Mus musculus
SRR11425582_17411gene=Hivep2	non-Kozak	m6A	non-6nt	IRES	Mus musculus
SRR11425582_17447gene=Klhl29	non-Kozak	m6A	non-6nt	IRES	Mus musculus
SRR11425582_19298gene=Pkp4	non-Kozak	m6A	non-6nt	IRES	Mus musculus
SRR11425582_19733gene=Ywhah	non-Kozak	non-m6A	non-6nt	IRES	Mus musculus
SRR11425582_20159gene=Heatr1	non-Kozak	m6A	non-6nt	IRES	Mus musculus
SRR11425582_20853gene=Trim35	non-Kozak	m6A	non-6nt	IRES	Mus musculus
SRR11425582_20999gene=Tmem161b	non-Kozak	m6A	non-6nt	IRES	Mus musculus
SRR11425582_21938gene=Lrp6	non-Kozak	non-m6A	non-6nt	IRES	Mus musculus
SRR11425582_2298gene=Kif1b	non-Kozak	m6A	non-6nt	IRES	Mus musculus
SRR11425582_23317gene=Man1c1	non-Kozak	non-m6A	non-6nt	IRES	Mus musculus
SRR11425582_23693gene=Srrm1	non-Kozak	m6A	non-6nt	IRES	Mus musculus
SRR11425582_23720gene=Smad5	non-Kozak	m6A	non-6nt	IRES	Mus musculus
SRR11425582_25056gene=Ankrd16	non-Kozak	m6A	non-6nt	IRES	Mus musculus
SRR11425582_25094gene=Cic	non-Kozak	m6A	non-6nt	IRES	Mus musculus
SRR11425582_26148gene=Ahnak	non-Kozak	non-m6A	non-6nt	non-IRES	Mus musculus
SRR11425582_26347gene=Hipk3	non-Kozak	non-m6A	non-6nt	IRES	Mus musculus
SRR11425582_27462gene=Adam22	non-Kozak	m6A	non-6nt	IRES	Mus musculus
SRR11425582_27740gene=Zdhhc21	non-Kozak	non-m6A	non-6nt	IRES	Mus musculus
SRR11425582_30159gene=Ubash3b	non-Kozak	m6A	non-6nt	IRES	Mus musculus
SRR11425582_3030gene=Polb	non-Kozak	non-m6A	non-6nt	IRES	Mus musculus
SRR11425582_30462gene=Dennd5b	non-Kozak	m6A	non-6nt	IRES	Mus musculus
SRR11425582_30654gene=Mga	non-Kozak	m6A	non-6nt	IRES	Mus musculus
SRR11425582_30865gene=Tmem181b-ps	non-Kozak	m6A	non-6nt	IRES	Mus musculus
SRR11425582_32169gene=Gse1	non-Kozak	non-m6A	non-6nt	IRES	Mus musculus
SRR11425582_33725gene=Cdon	non-Kozak	m6A	non-6nt	IRES	Mus musculus
SRR11425582_33799gene=Prkacb	non-Kozak	non-m6A	non-6nt	IRES	Mus musculus
SRR11425582_35639gene=Fbxl17	non-Kozak	non-m6A	non-6nt	IRES	Mus musculus
SRR11425582_35704gene=Rere	non-Kozak	non-m6A	non-6nt	IRES	Mus musculus
SRR11425582_36820gene=Rabep1	non-Kozak	m6A	non-6nt	IRES	Mus musculus
SRR11425582_37314gene=Luc7l3	non-Kozak	non-m6A	non-6nt	IRES	Mus musculus
SRR11425582_375gene=Nav2	non-Kozak	non-m6A	non-6nt	IRES	Mus musculus
SRR11425582_37778gene=Ldb2	non-Kozak	non-m6A	non-6nt	IRES	Mus musculus
SRR11425582_38128gene=Pag1	non-Kozak	m6A	non-6nt	IRES	Mus musculus
SRR11425582_38202gene=Lrp8	non-Kozak	m6A	non-6nt	non-IRES	Mus musculus
SRR11425582_39834gene=Usp54	non-Kozak	m6A	non-6nt	IRES	Mus musculus
SRR11425582_39893gene=Snd1	non-Kozak	m6A	non-6nt	non-IRES	Mus musculus
SRR11425582_40256gene=Dop1a	non-Kozak	m6A	non-6nt	IRES	Mus musculus
SRR11425582_40322gene=Pcyt1b	non-Kozak	m6A	non-6nt	non-IRES	Mus musculus
SRR11425582_40378gene=Zfand6	non-Kozak	non-m6A	non-6nt	IRES	Mus musculus
SRR11425582_40927gene=Arl15	non-Kozak	m6A	non-6nt	non-IRES	Mus musculus
SRR11425582_411gene=Birc2	non-Kozak	m6A	non-6nt	IRES	Mus musculus
SRR11425582_42182gene=Katnip	non-Kozak	non-m6A	non-6nt	IRES	Mus musculus
SRR11425582_42663gene=Hivep2	non-Kozak	m6A	non-6nt	IRES	Mus musculus
SRR11425582_44009gene=Tulp4	non-Kozak	m6A	non-6nt	IRES	Mus musculus
SRR11425582_44067gene=Rbm26	non-Kozak	non-m6A	non-6nt	IRES	Mus musculus
SRR11425582_44135gene=Arap2	non-Kozak	m6A	non-6nt	IRES	Mus musculus
SRR11425582_45013gene=Dab1	non-Kozak	non-m6A	non-6nt	IRES	Mus musculus
SRR11425582_45461gene=Hmgxb4	non-Kozak	m6A	non-6nt	non-IRES	Mus musculus
SRR11425582_45748gene=Zeb1	non-Kozak	m6A	non-6nt	IRES	Mus musculus
SRR11425582_45816gene=Ppip5k2	non-Kozak	m6A	non-6nt	IRES	Mus musculus
SRR11425582_46179gene=Rars2	non-Kozak	m6A	non-6nt	IRES	Mus musculus
SRR11425582_46728gene=Klhl7	non-Kozak	m6A	non-6nt	IRES	Mus musculus
SRR11425582_47230gene=Birc2	non-Kozak	non-m6A	non-6nt	IRES	Mus musculus
SRR11425582_48150gene=Pnpla8	non-Kozak	m6A	non-6nt	IRES	Mus musculus
SRR11425582_48331gene=Tcf12	non-Kozak	m6A	non-6nt	IRES	Mus musculus
SRR11425582_48523gene=Slmap	non-Kozak	non-m6A	non-6nt	IRES	Mus musculus
SRR11425582_48575gene=Habp4	non-Kozak	m6A	non-6nt	IRES	Mus musculus
SRR11425582_49004gene=Iqgap1	non-Kozak	m6A	non-6nt	IRES	Mus musculus
SRR11425582_49350gene=Zbtb2	non-Kozak	m6A	non-6nt	IRES	Mus musculus
SRR11425582_50020gene=Gtpbp1	non-Kozak	non-m6A	non-6nt	non-IRES	Mus musculus
SRR11425582_50770gene=Slc15a2	non-Kozak	m6A	non-6nt	IRES	Mus musculus
SRR11425582_50830gene=Tmeff1	non-Kozak	m6A	non-6nt	IRES	Mus musculus
SRR11425582_50946gene=Zfp148	non-Kozak	m6A	non-6nt	IRES	Mus musculus
SRR11425582_51099gene=Hif1a	non-Kozak	non-m6A	non-6nt	IRES	Mus musculus
SRR11425582_51426gene=Coq10b	non-Kozak	non-m6A	non-6nt	IRES	Mus musculus
SRR11425582_51477gene=Cdh11	non-Kozak	non-m6A	non-6nt	IRES	Mus musculus
SRR11425582_51577gene=Helz	non-Kozak	non-m6A	non-6nt	non-IRES	Mus musculus
SRR11425582_5182gene=Actr6	non-Kozak	non-m6A	non-6nt	IRES	Mus musculus
SRR11425582_52075gene=Cep128	non-Kozak	non-m6A	non-6nt	IRES	Mus musculus
SRR11425582_52207gene=Ube2n	non-Kozak	m6A	non-6nt	IRES	Mus musculus
SRR11425582_52555gene=Hira	non-Kozak	m6A	non-6nt	IRES	Mus musculus
SRR11425582_52739gene=Pde3b	non-Kozak	m6A	non-6nt	IRES	Mus musculus
SRR11425582_52803gene=Casp8ap2	non-Kozak	m6A	non-6nt	IRES	Mus musculus
SRR11425582_53115gene=Zfp536	non-Kozak	non-m6A	non-6nt	non-IRES	Mus musculus
SRR11425582_53252gene=Patj	non-Kozak	m6A	non-6nt	IRES	Mus musculus
SRR11425582_53302gene=Gm8752	non-Kozak	m6A	non-6nt	IRES	Mus musculus
SRR11425582_53623gene=Pik3c2a	non-Kozak	m6A	non-6nt	IRES	Mus musculus
SRR11425582_53727gene=Dhx29	non-Kozak	m6A	non-6nt	IRES	Mus musculus
SRR11425582_54100gene=Kdm2a	non-Kozak	m6A	non-6nt	IRES	Mus musculus
SRR11425582_54123gene=Zfp236	non-Kozak	m6A	non-6nt	IRES	Mus musculus
SRR11425582_54239gene=Rnf4	non-Kozak	non-m6A	non-6nt	IRES	Mus musculus
SRR11425582_54319gene=intergenic	non-Kozak	m6A	non-6nt	IRES	Mus musculus
SRR11425582_54454gene=Dennd4a	non-Kozak	non-m6A	non-6nt	IRES	Mus musculus
SRR11425582_54763gene=Tpm1	non-Kozak	non-m6A	non-6nt	IRES	Mus musculus
SRR11425582_55338gene=Phf3	non-Kozak	m6A	non-6nt	IRES	Mus musculus
SRR11425582_5538gene=Uggt2	non-Kozak	non-m6A	non-6nt	IRES	Mus musculus
SRR11425582_55392gene=Vwa5a	non-Kozak	non-m6A	non-6nt	IRES	Mus musculus
SRR11425582_55772gene=Kif27	non-Kozak	m6A	non-6nt	IRES	Mus musculus
SRR11425582_56390gene=Zfp605	non-Kozak	m6A	non-6nt	IRES	Mus musculus
SRR11425582_56984gene=Ptbp3	non-Kozak	non-m6A	non-6nt	IRES	Mus musculus
SRR11425582_57984gene=Slf1	non-Kozak	m6A	non-6nt	IRES	Mus musculus
SRR11425582_59041gene=Ezh2	non-Kozak	m6A	non-6nt	IRES	Mus musculus
SRR11425582_59641gene=Cpeb2	non-Kozak	m6A	non-6nt	IRES	Mus musculus
SRR11425582_59784gene=Recql	non-Kozak	m6A	non-6nt	non-IRES	Mus musculus
SRR11425582_60371gene=Mtif2	non-Kozak	m6A	non-6nt	IRES	Mus musculus
SRR11425582_60620gene=Aftph	non-Kozak	non-m6A	non-6nt	IRES	Mus musculus
SRR11425582_61068gene=Chst15	non-Kozak	non-m6A	non-6nt	non-IRES	Mus musculus
SRR11425582_61221gene=Pde4a	non-Kozak	m6A	non-6nt	IRES	Mus musculus
SRR11425582_61245gene=Ttc27	non-Kozak	m6A	non-6nt	IRES	Mus musculus
SRR11425582_61536gene=Zfp560	non-Kozak	non-m6A	non-6nt	IRES	Mus musculus
SRR11425582_61800gene=Spcs3	non-Kozak	m6A	non-6nt	IRES	Mus musculus
SRR11425582_61877gene=Ecpas	non-Kozak	non-m6A	non-6nt	IRES	Mus musculus
SRR11425582_62147gene=Wbp11	non-Kozak	m6A	non-6nt	IRES	Mus musculus
SRR11425582_62187gene=Klhl8	non-Kozak	m6A	non-6nt	non-IRES	Mus musculus
SRR11425582_62238gene=Zfp790	non-Kozak	m6A	non-6nt	IRES	Mus musculus
SRR11425582_62446gene=Tent4a	non-Kozak	non-m6A	non-6nt	IRES	Mus musculus
SRR11425582_62716gene=Bag6	non-Kozak	non-m6A	non-6nt	non-IRES	Mus musculus
SRR11425582_6278gene=Fam120a	non-Kozak	non-m6A	non-6nt	IRES	Mus musculus
SRR11425582_63641gene=Tle1	non-Kozak	m6A	non-6nt	IRES	Mus musculus
SRR11425582_63719gene=Lrfn1	non-Kozak	m6A	non-6nt	non-IRES	Mus musculus
SRR11425582_63890gene=Btrc	non-Kozak	m6A	non-6nt	IRES	Mus musculus
SRR11425582_64015gene=Anp32e	non-Kozak	non-m6A	non-6nt	non-IRES	Mus musculus
SRR11425582_64045gene=Evc2	non-Kozak	non-m6A	non-6nt	IRES	Mus musculus
SRR11425582_64102gene=Rrbp1	non-Kozak	non-m6A	non-6nt	IRES	Mus musculus
SRR11425582_64176gene=Pgm2l1	non-Kozak	m6A	non-6nt	IRES	Mus musculus
SRR11425582_64273gene=intergenic	non-Kozak	non-m6A	non-6nt	IRES	Mus musculus
SRR11425582_6433gene=Haus2	non-Kozak	non-m6A	non-6nt	IRES	Mus musculus
SRR11425582_6447gene=Actr2	non-Kozak	m6A	non-6nt	IRES	Mus musculus
SRR11425582_64572gene=Celf2	non-Kozak	m6A	non-6nt	IRES	Mus musculus
SRR11425582_65444gene=Bach2	non-Kozak	m6A	non-6nt	IRES	Mus musculus
SRR11425582_6618gene=Clec16a	non-Kozak	m6A	non-6nt	IRES	Mus musculus
SRR11425582_66333gene=Exoc2	non-Kozak	m6A	non-6nt	IRES	Mus musculus
SRR11425582_66725gene=Asah2	non-Kozak	m6A	non-6nt	IRES	Mus musculus
SRR11425582_66760gene=Gm32786	non-Kozak	m6A	non-6nt	IRES	Mus musculus
SRR11425582_66898gene=Washc4	non-Kozak	m6A	non-6nt	IRES	Mus musculus
SRR11425582_66913gene=Prmt3	non-Kozak	m6A	non-6nt	non-IRES	Mus musculus
SRR11425582_6691gene=Zmym1	non-Kozak	m6A	non-6nt	IRES	Mus musculus
SRR11425582_67610gene=Rabgef1	non-Kozak	m6A	non-6nt	non-IRES	Mus musculus
SRR11425582_67982gene=Desi2	non-Kozak	m6A	non-6nt	IRES	Mus musculus
SRR11425582_68037gene=Dock7	non-Kozak	non-m6A	non-6nt	IRES	Mus musculus
SRR11425582_68407gene=Cadm1	non-Kozak	m6A	non-6nt	IRES	Mus musculus
SRR11425582_68426gene=Angptl6	non-Kozak	m6A	non-6nt	non-IRES	Mus musculus
SRR11425582_68588gene=Gria4	non-Kozak	non-m6A	non-6nt	IRES	Mus musculus
SRR11425582_68807gene=Trpc3	non-Kozak	m6A	non-6nt	non-IRES	Mus musculus
SRR11425582_68905gene=Epha7	non-Kozak	m6A	non-6nt	IRES	Mus musculus
SRR11425582_69127gene=Slu7	non-Kozak	m6A	non-6nt	non-IRES	Mus musculus
SRR11425582_69226gene=Gatad2a	non-Kozak	m6A	non-6nt	non-IRES	Mus musculus
SRR11425582_69242gene=Zfp280c	non-Kozak	m6A	non-6nt	IRES	Mus musculus
SRR11425582_69364gene=Shld2	non-Kozak	m6A	non-6nt	IRES	Mus musculus
SRR11425582_69478gene=Arid4a	non-Kozak	m6A	non-6nt	non-IRES	Mus musculus
[truncated: 424,393+ more rows]
