# Supplementary material for: Backward translation of circular RNAs
Source: Research Square preprint supplement (doi:10.21203/rs.3.rs-5558507/v1), 2025-01-22
Supplement: Supplementary file 4 [file ab75769f7da7978769230a6c.xlsx]

## Sheet: Antigenic epitopes
CircRNA	Name	Epitope
dm.circSCRIB	Anti-dm.circSCRIB_bt_p 1-1	CRDERPVKRRLPADR
	Anti-dm.circSCRIB_bt_p 1-2	CAAIVRRRLGRPPTK
hs.circCAPN15	Anti-hs.circCAPN15_bt_p 2-1	CGRPTGRHPTGRQGR

## Sheet: Sequences
CircRNA	CircRNA sequence	BT protein	BW ORF sequence
hs.circCAPN15	GCCTCAAAGGAGAGGGGATCCAGAATTCTCTGTCTCACCCCCTCAGCCCCTGCCCTTGAAGCTTCTGTCCCCAAGGCTGTGGGGAGGAACCAGGGAAGGGCTGGCGCGTCTGCTGTGCGATCCCAGGTGCTCGTGCCTCGCTGAGCTCAGCCCCTGTGGCCTCAGAGCTGCAGGCCCCTCCCGGGTGTCAGAGCACTGACTGGAAAGGCCCCCCACATCCCTGCCCTCTGCTGCTCCCCATCGTCGCGGGGGAGAAGCTGGAACTGCACCCCCACCCCCCCCAGCCCGCTCACCTAGGGCTGCCCCCAGGCCTCCCTGAGCTCCAAAGGATATGTTCTTTGGTGCTTTTTTTTTTTTTGGCTCTGTCTCCCAGGCTGGAATGCAGCTGTGGTGCTCACG…	hs.circCAPN15_bt_p	ATGGGTTTCCATCCGTCCCCTCCATCGTCTCCCGCATCCCTCGACGACGTCCGGTCCGACCTACTTCTAGACCCCCCGGCGAAGTGTGTCGACGGGTGTACGGTGAGACCTCTGAAGGTCTTCCTGCCCTCGGGCTGGTACGGAACACGTGGGTGTCTCGGTCCGGGGCTCTTTGTTCCTGGGACACTCCGATACCGACTCCCGCCCCCGGCCAAGGACCCCAGAGGGGAGGTCTCCCCGCTCTCGGTGGGGACGACCCTCCGGACCCTCTCCGTGTCCGACAGGTCCCGGAGACTGTGCGCCGGGTGGACACGAAGACCCTTCCGGTGGAATGGGGGAGACCGACTCCTCTTTAGTTTATGTCAACTCTTGCAATTAGGACTCTGCCCTCCTGGGACG…
hs.circCCDC88C	GGAAGAGCATGGAGGAAATCAAGAAGGTGCTGCTGCTGGTGCTGGGCTGTGCTGTCCAGGAGAGGAAAGAGGAGTTCATTGAAAGAATCAAACAGCTGGACATTGAGACCCAGGCTGGCATCGTGGCCCATATCCAGGAGGTGACTCACAACCAAGAGAACGTGTTTGACCTGCAGTGGCTGGAGCTGCCCGACGTGGCTCCGGAGGAGCTGGAGGCCCTGTCGAGGAGCATGGTGCTCCACCTGCGGAGGCTCATCGACCAGCGGGACGAGTGCACCGAGCTGATCGTGGACCTCACTCAGGAACGGGACTACCTGCAGGCACAGCATCCACCCAGCCCCATCAAGTCCTCCAGCGCCGACTCCACTCCCAGCCCCACCAGCAGCCTCTCTAGCGAAG…	hs.circCCDC88C_bt_p	ATGCCGGTCCACGACGAACAGAAGCGATCTCTCCGACGACCACCCCGACCCTCACCTCAGCCGCGACCTCCTGAACTACCCCGACCCACCTACGACACGGACGTCCATCAGGGCAAGGACTCACTCCAGGTGCTAGTCGAGCCACGTGAGCAGGGCGACCAGCTACTCGGAGGCGTCCACCTCGTGGTACGAGGAGCTGTCCCGGAGGTCGAGGAGGCCTCGGTGCAGCCCGTCGAGGTCGGTGACGTCCAGTTTGTGCAAGAGAACCAACACTCAGTGGAGGACCTATACCCGGTGCTACGGTCGGACCCAGAGTTACAGGTCGACAAACTAAGAAAGTTACTTGAGGAGAAAGGAGAGGACCTGTCGTGTCGGGTCGTGGTCGTCGTCGTGGAAGAA…
hs.circIFITM1	GTGTGGGTATAAACTGCTGTATCTAGGGGCAGGACCAAGGGGGCAGGGGCAACAGCCCCAGCGTGCAGGGCCAGCATTGCACAGTGGAGTGCAAAGGTTGCAGGCTATGGGCGGCTACTAGTAACCCCGTTTTTCCTGTATTATCTGTAACATAATATGGTAGACTGTCACAGAGCCGAATACCAGTAACAGGATGAATCCAATGGTCATGAGGATGCCCA	hs.circIFITM1_bt_p	ATGTCGTCAAATATGGGTGTGACCCGTAGGAGTACTGGTAACCTAAGTAGGACAATGACCATAAGCCGAGACACTGTCAGATGGTATAATACAATGTCTATTATGTCCTTTTTGCCCCAATGA
dm.circSCRIB	CTGGGGTAATTGGCTGGTATTCCTGCTGGGGCAGCAGATAGCAAGACAACACCTGTTCGCCCGTTTCCGCATCCGTGTCCGGTTGAAAGGTGAGCAGCGGCTGCGACTGATTCTCCGACAGCCAGACGGCCTTCAGCTGCAAATTGACCAGCGAGTAGGGCAGATACAGCAACTGATTGCCGCTCACATCGAGCACATGCAGCACGGTGCAGTTGCCCAACTCTGGCGGCAGCTTCTTCAGCTTGTTGTCCCGCAGACTCAGCACGCCCAGATTGGCACACTGGCCAATCTCCAGGGGCAGGTACTCCAGGGCATTGCGATCCACGTTCAGATTGTTCAACTTGGTCATTTGGCCAATGGAGGCGGGCAGCTCGGAGAGAAAGTTCTCGGTCAGAATCA…	dm.circSCRIB_bt_p	ATGCGATCCTTTGACGCTTTTGTACGTCCTCGACTAAGACTGGCTCTTGAAAGAGAGGCTCGACGGGCGGAGGTAACCGGTTTACTGGTTCAACTTGTTAGACTTGCACCTAGCGTTACGGGACCTCATGGACGGGGACCTCTAACCGGTCACACGGTTAGACCCGCACGACTCAGACGCCCTGTTGTTCGACTTCTTCGACGGCGGTCTCAACCCGTTGACGTGGCACGACGTACACGAGCTACACTCGCCGTTAGTCAACGACATAGACGGGATGAGCGACCAGTTAAACGTCGACTTCCGGCAGACCGACAGCCTCTTAGTCAGCGTCGGCGACGAGTGGAAAGTTGGCCTGTGCCTACGCCTTTGCCCGCTTGTCCACAACAGAACGATAGACGA…
dm.circUNC-5	GGCATGTTCGTAGGGAGCTGCTGCCTCGACATCCGCGCTTCTCACCCGGATGTTTAGATTTCGGCTATTCAGGGTAAACGCAAAGACCTGGCTCTCGCCAAGAAAACTGCCACCCAGCTTGGCCTCCACATTGGCGCAGATATCCCTGCTATTGGGGAAGTCCTTGACCACGTAAATCCGCAAACTGCAATTTGCGTTGCTGGGTGGTGTATGTTGACTGAAGGCCAGCAGCTTCATCTTGATCGAGGGTTGTTGAATCCTCGGCTCCGCCACCACGGTGAAGTGACCCAGTTGCTCAGTCATAATGAACACATGCGTCGCCTCCAGCTGTACGAACATGGGTGTGTTGATGGTTTCCTCGCCGACAGAAACTGCCCGCCTCCAGTTGACACTCAGCTC…	dm.circUNC-5_bt_p	ATGTGGTGGGTCGTTGCGTTTAACGTCAAACGCCTAAATGCACCAGTTCCTGAAGGGGTTATCGTCCCTATAGACGCGGTTACACCTCCGGTTCGACCCACCGTCAAAAGAACCGCTCTCGGTCCAGAAACGCAAATGGGACTTATCGGCTTTAGATTTGTAGGCCCACTCTTCGCGCCTACAGCTCCGTCGTCGAGGGATGCTTGTACGGTAACCTTTCGTGCAGTTCTTCGTGCAtag

## Sheet: BTISs
CircRNA	BTIS
hs.circIFITM1	TCTAGGGGCAGGACCAAGGGGGCAGGGGCAACAGCCCCAGCGTGCAGGGCCAGCATTGCACAGTGGAGTGCAAAGGTTGCAGGCTATGGGCGGCTACTA
hs.circITIH4	ATCCCAGCACTTTGGGAGGCCAGCGCAGGTGGATCACCTAAGGTCAGGAATTGGAGACCAGCCTGGCCAACATGGTGAA
hs.circHSH2D	GCTCACGCCTATAATCCCAGCACTTTGGGAATACAGGTGTGAGCCACTACGCAGACC
hs.circMGC27382	TGTAATCCCAGCACTTTGGGAGGCCAAGGCAGGCGGATCACGAGGTCAGGAGATCAAGACCATCCTGGCTAACACGGTG
EMCV-IRES	CGCCCCTCTCCCTCCCCCCCCCCTAACGTTACTGGCCGAAGCCGCTTGGAATAAGGCCGGTGTGCGTTTGTCTATATGTTATTTTCCACCATATTGCCGTCTTTTGGCAATGTGAGGGCCCGGAAACCTGGCCCTGTCTTCTTGACGAGCATTCCTAGGGGTCTTTCCCCTCTCGCCAAAGGAATGCAAGGTCTGTTGAATGTCGTGAAGGAAGCAGTTCCTCTGGAAGCTTCTTGAAGACAAACAACGTCTGTAGCGACCCTTTGCAGGCAGCGGAACCCCCCACCTGGCGACAGGTGCCTCTGCGGCCAAAAGCCACGTGTATAAGATACACCTGCAAAGGCGGCACAACCCCAGTGCCACGTTGTGAGTTGGATAGTTGTGGAAAGAGTCAAATGG…
dm.circSCRIB	TCGTTCAACCGCTGCAATCGATTCTGATCCAACTTCAGGATAGTCAGTCTGCTCAGCTTGGCAATGCCATCGGGCAGTGCCTCGAGTAGATTCTGGGCCAGATCGAGGTCCGTCAGGCTGACCAGACCGCTGATCTCGTTGGGCAGCTCCTCCAGTCGATTTTCGGAGACATCGAGGTAGGTCAGTTTGGTCAGGAGTCCCAGCTCCGGCGGCAATCGCTGCAG
dm.circUNC-5	TGTTGACTGAAGGCCAGCAGCTTCATCTTGATCGAGGGTTGTTGAATCCTCGGCTCCGCCACCACGGTGAAGTGACCCAGTTGCTCAGTCATAATGAACAC
hs.circCAPN15	AGGGCTGCCCCCAGGCCTCCCTGAGCTCCAAAGGATATGTTCTTTGGTGCT
	GACGTTCTCTTGACCCTTCCTTCTGTGATAAAGCAAAAGCGTGTGATCTCTTTTCTCACCAAGGAATAAAACGTCTCTGAATACCACAGAC
