# Supplementary material for: Backward translation of circular RNAs
Source: Research Square preprint supplement (doi:10.21203/rs.3.rs-5558507/v1), 2025-01-22
Supplement: Supplementary file 5 [file d3e223792a3148475dd48010.xlsx]

## Sheet: BTIS-motif
MOTIF	WIDTH	BEST POSSIBLE MATCH
1	50	GTGGCTCACGCCTGTAATCCCAGCACTTTGGGAGGCTGAGGCAGGAGGAT
2	41	GYGATYCTCCYGCCTCRGCCTCCCAARKWGCTGGGATTACA
3	41	RGTYTCRCYMTGTTGSCCAGGCTGGWSTSSARYKSCKSRMY
4	50	CCAGCCTGGSCAACAKRGYGARACCCYRTCTCWAMWAAAAAWAMAAAAAW
5	50	TGAACCYRGGAGGCRGAGGTTGCAGTGAGCCGAGATCGYGCCACTGCACT
6	41	GGCRYGHGCCACCAYGCCYRGCTAATTTTTKTWTTTTTWDT
7	29	TCACTGCAACCTCYRCCTCCYRGGTTCAA
8	29	SCNSSVSCNGSCCSBCCVGSVCCCHSSSS
9	50	WWWWWWWWDTWTWTWWTWTTTTWTTTTTTTTTTTTTTTTTTTTTTDARAW
10	29	RARRAARADVWRRARGARAARRAARAARA

## Sheet: BTIS-motif-containing circRNAs
SEQUENCE NAME	E-VALUE	LENGTH
hsa-CTC-340A15_0018	7.8e-39	1873
hsa-KDM4B_0048	1.4e-38	934
hsa-NSD1_0102	1.4e-38	1036
hsa-MFSD12_0004	1.7e-38	626
hsa-POLR2F_0006	1.8e-38	1208
hsa-AKAP12_0034	2.4e-38	1106
hsa_circ_0089783	2.9e-38	10505
hsa-IP6K1_0013	3.1e-38	463
hsa_circ_0110755	3.2e-38	3180
hsa_circ_0063867	7.2e-38	18173
hsa-SEC22C_0013	9.7e-38	1350
hsa-MECP2_0021	1e-37	1344
hsa-NMNAT1_0008	1.1e-37	1495
hsa-RUFY1_0051	1.2e-37	1258
hsa-ITPKB_0005	1.4e-37	911
hsa-RBM39_0108	1.5e-37	1554
hsa-TPGS1_0002	1.6e-37	1219
hsa-SKI_0010	1.7e-37	472
hsa-RLF_0045	1.7e-37	1357
hsa-IL3RA_0001	2e-37	917
hsa-SLC12A6_0087	2e-37	898
hsa_circ_0134594	2.1e-37	47708
hsa-PLIN3_0011	2.4e-37	1438
hsa_circ_0139854	2.5e-37	10542
hsa-JMJD1C_0289	2.5e-37	1646
hsa_circ_0063469	2.7e-37	42792
hsa-TCEB3-AS1_0004	2.9e-37	1048
hsa_circ_0063468	3e-37	30354
hsa_circ_0087087	3.2e-37	3174
hsa-MZF1-AS1_0005	3.3e-37	876
hsa-ANKLE2_0029	3.4e-37	1707
hsa_circ_0038406	3.6e-37	22578
hsa_circ_0087088	3.7e-37	3437
hsa-intergenic_031988	4.1e-37	1197
hsa_circ_0133256	4.1e-37	60089
hsa_circ_0038447	4.3e-37	24693
hsa_circ_0035295	4.3e-37	13459
hsa-TRIP11_0126	4.5e-37	983
hsa-TPT1-AS1_0041	4.5e-37	1464
hsa-ZNF589_0005	4.6e-37	640
hsa-TAF13_0002	5e-37	471
TC-hsa-GABPB1-AS1_0002	5e-37	5517
hsa-PLA2G4C_0064	5.1e-37	1771
hsa-RBX1_0018	5.7e-37	1434
hsa_circ_0119228	5.8e-37	6221
hsa_circ_0137183	5.9e-37	49842
hsa_circ_0038448	6e-37	29226
hsa-PSMC3_0009	6.1e-37	1215
hsa_circ_0027022	6.3e-37	9261
hsa-CAPN12_0011	6.3e-37	1470
hsa-MAPK1_0073	6.4e-37	863
hsa_circ_0099966	6.8e-37	53606
hsa_circ_0099964	6.8e-37	53702
hsa_circ_0099963	6.9e-37	53984
hsa_circ_0025043	7e-37	34828
hsa_circ_0110890	7.2e-37	88755
hsa-ARRDC2_0011	7.3e-37	1682
hsa-intergenic_027464	7.4e-37	1507
hsa_circ_0128489	7.4e-37	17967
hsa_circ_0003955	7.5e-37	90766
hsa_circ_0038411	7.5e-37	32731
hsa-RNU6-955P_0002	7.8e-37	1560
hsa_circ_0062927	7.8e-37	14166
hsa_circ_0089784	7.9e-37	30334
hsa-NUB1_0035	8e-37	1751
hsa_circ_0002816	8.5e-37	96450
hsa_circ_0038412	8.5e-37	34794
hsa-CAPN12_0006	8.6e-37	1706
hsa-HNRNPU_0053	8.6e-37	1058
hsa_circ_0124118	8.6e-37	8847
hsa-ACBD4_0002	9.1e-37	738
hsa-HNRNPU_0072	9.6e-37	1114
hsa-NUP98_0149	9.7e-37	1877
hsa_circ_0140124	9.8e-37	28855
hsa_circ_0131494	1e-36	93211
hsa-HNRNPU_0075	1e-36	1152
hsa-CRK_0014	1e-36	479
hsa_circ_0018831	1.1e-36	16029
hsa_circ_0018830	1.1e-36	16122
hsa-EML2_0039	1.1e-36	1498
hsa_circ_0018826	1.1e-36	16454
hsa-FBXL19_0020	1.1e-36	723
hsa-PLD3_0010	1.1e-36	1386
hsa_circ_0133359	1.1e-36	11575
hsa-ST7L_0131	1.2e-36	1057
hsa_circ_0049500	1.2e-36	20734
hsa_circ_0109905	1.2e-36	71536
hsa_circ_0049501	1.2e-36	20795
hsa_circ_0116544	1.3e-36	42426
hsa-STK4_0032	1.3e-36	1393
hsa-CPT1A_0051	1.3e-36	1480
hsa_circ_0103864	1.3e-36	23315
hsa-RP11-58C22.1_0008	1.3e-36	1412
hsa_circ_0008352	1.4e-36	8605
hsa_circ_0109903	1.4e-36	77409
hsa-TLK1_0079	1.4e-36	1019
hsa-TERF2_0016	1.4e-36	1676
hsa_circ_0123263	1.5e-36	12428
hsa-GPATCH8_0073	1.5e-36	1908
hsa_circ_0045107	1.5e-36	21358
hsa_circ_0032460	1.5e-36	16628
hsa_circ_0049502	1.5e-36	23283
hsa-ZNF787_0009	1.5e-36	823
hsa_circ_0043315	1.5e-36	7771
hsa-GEMIN8_0019	1.6e-36	696
hsa-AMBRA1_0044	1.6e-36	651
hsa_circ_0106878	1.6e-36	45818
hsa_circ_0037987	1.6e-36	7232
hsa_circ_0134626	1.6e-36	10386
hsa_circ_0000766	1.6e-36	46301
hsa-PDS5A_0219	1.7e-36	1303
hsa_circ_0004192	1.7e-36	9100
hsa_circ_0109904	1.7e-36	85237
hsa_circ_0055632	1.8e-36	1468
hsa-RP11-162P23.2_0004	1.8e-36	1324
hsa_circ_0138765	1.8e-36	17780
hsa_circ_0001587	1.8e-36	25626
hsa_circ_0106879	1.9e-36	49212
hsa-SNX10_0010	1.9e-36	1303
hsa-PHF20_0081	1.9e-36	1801
hsa_circ_0005447	1.9e-36	19432
hsa-PI4KA_0091	1.9e-36	1952
hsa-TOP3A_0054	1.9e-36	1813
hsa-TOP3A_0048	2e-36	1818
hsa-LPIN2_0045	2e-36	1148
hsa_circ_0120643	2e-36	3649
hsa-intergenic_032411	2e-36	1363
hsa_circ_0000767	2e-36	51184
hsa_circ_0097970	2e-36	19987
hsa_circ_0128184	2e-36	37896
hsa-HSH2D_0010	2e-36	1956
hsa_circ_0000768	2e-36	51558
hsa_circ_0000769	2e-36	51641
hsa-CBX1_0017	2.1e-36	1914
hsa_circ_0057295	2.1e-36	4833
hsa-PHF7_0016	2.1e-36	1611
hsa_circ_0122429	2.1e-36	31081
hsa-RP11-712L6_0001	2.1e-36	1223
hsa_circ_0105176	2.1e-36	15061
hsa-SUFU_0022	2.2e-36	902
hsa_circ_0134593	2.2e-36	26644
hsa_circ_0116245	2.3e-36	31804
hsa_circ_0102538	2.3e-36	62324
hsa-JPX_0014	2.3e-36	1612
hsa_circ_0070887	2.4e-36	6920
hsa_circ_0038208	2.4e-36	15122
hsa_circ_0011535	2.4e-36	33454
hsa_circ_0103617	2.5e-36	25179
hsa_circ_0084511	2.5e-36	7439
hsa_circ_0131610	2.5e-36	2272
hsa-GPBP1_0026	2.6e-36	1799
hsa-ZC3H7B_0034	2.6e-36	1568
hsa-RBM23_0012	2.6e-36	1717
hsa-WDR70_0067	2.6e-36	767
hsa-GATAD2B_0048	2.7e-36	1431
hsa_circ_0104833	2.7e-36	5542
hsa_circ_0109654	2.7e-36	15304
hsa-MRPL48_0026	2.7e-36	1780
hsa_circ_0063298	2.7e-36	20444
hsa_circ_0009288	2.9e-36	14173
hsa_circ_0045786	3.1e-36	11200
hsa-ST3GAL2_0024	3.1e-36	1896
hsa_circ_0089253	3.1e-36	30801
hsa_circ_0121676	3.1e-36	14585
hsa_circ_0006263	3.2e-36	22891
hsa-SIK3_0117	3.2e-36	1990
hsa_circ_0102665	3.2e-36	744
hsa_circ_0006648	3.3e-36	7832
hsa-TMEM45B_0007	3.3e-36	1728
hsa_circ_0003603	3.3e-36	1439818
hsa_circ_0115463	3.3e-36	37478
hsa_circ_0005283	3.3e-36	1441289
hsa_circ_0008167	3.3e-36	1441603
hsa_circ_0131793	3.4e-36	3953
hsa_circ_0008576	3.4e-36	1469547
hsa_circ_0003317	3.4e-36	1470228
hsa_circ_0006821	3.4e-36	1470362
hsa_circ_0081708	3.4e-36	22443
hsa_circ_0104503	3.5e-36	5514
hsa_circ_0006671	3.6e-36	25759
hsa_circ_0005073	3.6e-36	5635
hsa_circ_0081709	3.7e-36	13854
hsa_circ_0081704	3.7e-36	23247
hsa-intergenic_008373	3.7e-36	1202
TC-hsa-ZBTB8A_0005	3.7e-36	6120
hsa_circ_0081680	3.7e-36	13998
hsa_circ_0109124	3.8e-36	94090
hsa-RAD54L2_0041	3.8e-36	1795
hsa_circ_0108765	3.8e-36	24206
hsa-C8orf76_0007	3.9e-36	1748
hsa_circ_0122628	3.9e-36	11964
hsa-intergenic_008479	3.9e-36	1090
hsa-intergenic_012966	4e-36	805
hsa_circ_0112399	4e-36	14506
hsa_circ_0107608	4e-36	81872
hsa_circ_0078802	4.1e-36	16674
hsa_circ_0123325	4.1e-36	4856
hsa-S100PBP_0042	4.1e-36	1997
hsa_circ_0121782	4.2e-36	39121
hsa_circ_0140143	4.2e-36	14405
hsa-LPIN2_0036	4.3e-36	1676
hsa_circ_0097971	4.4e-36	29437
hsa_circ_0139138	4.4e-36	3354
hsa_circ_0001586	4.4e-36	39800
hsa_circ_0007319	4.4e-36	1660819
hsa_circ_0122957	4.4e-36	3973
hsa_circ_0097962	4.4e-36	29569
hsa-intergenic_027613	4.5e-36	1525
hsa_circ_0119633	4.6e-36	17515
hsa_circ_0025318	4.6e-36	20872
hsa_circ_0081694	4.6e-36	25950
hsa_circ_0121783	4.6e-36	40838
hsa-TYRO3_0008	4.7e-36	1681
hsa_circ_0112502	4.8e-36	38303
hsa-URB1_0064	4.8e-36	1019
hsa_circ_0105832	4.8e-36	18144
hsa-intergenic_008312	4.9e-36	1798
hsa_circ_0041843	4.9e-36	9078
hsa-PCDH9_0062	4.9e-36	1076
hsa_circ_0076198	4.9e-36	5344
hsa_circ_0078975	4.9e-36	10815
hsa-JMJD1C_0353	5e-36	1730
hsa-SPIRE1_0045	5e-36	1044
hsa_circ_0101715	5.1e-36	48362
hsa_circ_0116847	5.1e-36	17092
hsa_circ_0107261	5.2e-36	44212
hsa-DGKA_0005	5.2e-36	991
hsa_circ_0108855	5.2e-36	49710
hsa_circ_0139029	5.3e-36	30271
hsa-KDM2A_0131	5.3e-36	805
hsa_circ_0006372	5.3e-36	1825891
hsa-KDM2A_0053	5.3e-36	806
hsa_circ_0114016	5.3e-36	17015
hsa_circ_0117789	5.4e-36	19128
hsa-TMOD1_0022	5.4e-36	1951
hsa_circ_0062519	5.5e-36	37886
hsa-PRPSAP1_0041	5.5e-36	1586
hsa_circ_0032355	5.7e-36	41861
hsa_circ_0062520	5.7e-36	38553
hsa_circ_0105792	5.9e-36	50085
hsa-CSNK1E_0025	5.9e-36	1837
hsa_circ_0131558	5.9e-36	2430
hsa_circ_0102023	5.9e-36	18398
hsa_circ_0096489	5.9e-36	10427
hsa_circ_0076199	6e-36	5890
hsa_circ_0089796	6e-36	23925
hsa-MGAT4A_0044	6.1e-36	1912
hsa_circ_0052309	6.1e-36	59928
hsa-CTD-3105H18_0009	6.2e-36	1551
hsa-LARGE1_0185	6.3e-36	1538
hsa_circ_0078823	6.4e-36	10901
hsa_circ_0104269	6.4e-36	24746
hsa_circ_0111258	6.5e-36	7387
hsa-SBDS_0008	6.5e-36	1728
hsa_circ_0063302	6.6e-36	82111
hsa_circ_0063299	6.6e-36	82260
hsa_circ_0133358	6.7e-36	28264
hsa_circ_0018755	6.8e-36	23096
hsa_circ_0044215	6.8e-36	11952
hsa_circ_0004082	6.8e-36	108191
hsa-NUP188_0026	6.8e-36	1874
hsa_circ_0038892	6.9e-36	108457
hsa-MBD3_0021	6.9e-36	1804
hsa_circ_0095662	6.9e-36	28079
hsa_circ_0140123	7.1e-36	13273
hsa_circ_0038893	7.1e-36	110279
hsa_circ_0042350	7.1e-36	17670
hsa_circ_0100256	7.2e-36	11338
hsa-SAMD4B_0017	7.3e-36	1088
hsa-intergenic_019293	7.3e-36	1018
hsa-SEPT7P2_0024	7.3e-36	1366
hsa_circ_0038894	7.3e-36	112088
hsa_circ_0138745	7.5e-36	21134
hsa-RILPL1_0013	7.5e-36	1512
hsa_circ_0097684	7.7e-36	31015
hsa_circ_0098920	7.8e-36	13923
hsa_circ_0038895	8e-36	117311
hsa_circ_0098921	8e-36	14147
hsa_circ_0103798	8.1e-36	45464
hsa_circ_0138485	8.1e-36	21665
hsa_circ_0128660	8.1e-36	15373
hsa_circ_0001585	8.1e-36	91153
hsa-SAMD4B_0008	8.1e-36	1150
hsa_circ_0068512	8.2e-36	108948
hsa_circ_0114009	8.2e-36	21125
hsa_circ_0007261	8.2e-36	23937
hsa_circ_0098922	8.2e-36	14342
hsa-MED13_0129	8.2e-36	835
hsa_circ_0096673	8.3e-36	20432
hsa_circ_0099578	8.3e-36	43639
hsa_circ_0110336	8.4e-36	12734
hsa_circ_0097634	8.4e-36	3495
hsa_circ_0042349	8.6e-36	19452
hsa_circ_0098923	8.7e-36	14758
hsa_circ_0038209	8.8e-36	6812
TC-hsa-RNF115_0006	8.8e-36	2261
hsa_circ_0052065	8.9e-36	1690
hsa_circ_0038032	9e-36	6882
hsa_circ_0008848	9e-36	337651
hsa_circ_0008049	9.1e-36	339136
hsa_circ_0110756	9.1e-36	11465
hsa_circ_0038896	9.3e-36	126424
hsa_circ_0092576	9.3e-36	45419
hsa_circ_0136603	9.4e-36	69175
TC-hsa-ZNF665_0001	9.5e-36	3927
hsa_circ_0099615	9.6e-36	34101
TC-hsa-RNF115_0007	9.8e-36	2378
TC-hsa-FGFR1OP_0050	1e-35	7964
hsa_circ_0097676	1e-35	6871
hsa_circ_0137321	1e-35	44041
TC-hsa-ZNF665_0002	1e-35	4054
hsa_circ_0075961	1e-35	8847
hsa_circ_0002825	1e-35	15549
hsa-RNF38_0064	1e-35	1628
hsa_circ_0109306	1e-35	36268
hsa-intergenic_007197	1.1e-35	1284
hsa_circ_0102430	1.1e-35	24164
hsa_circ_0114704	1.1e-35	13453
hsa-PCGF6_0030	1.1e-35	1377
hsa_circ_0114700	1.1e-35	13533
hsa_circ_0114697	1.1e-35	13640
hsa_circ_0122787	1.1e-35	18246
hsa_circ_0084132	1.1e-35	29683
hsa_circ_0114692	1.1e-35	13760
hsa_circ_0138819	1.1e-35	24637
hsa_circ_0052300	1.1e-35	72059
hsa_circ_0114689	1.1e-35	13826
hsa_circ_0114684	1.1e-35	13839
hsa_circ_0014674	1.1e-35	32907
hsa-TOB2_0002	1.1e-35	1707
hsa_circ_0119794	1.1e-35	20493
hsa-TOB2_0001	1.1e-35	1709
hsa_circ_0008048	1.1e-35	27576
hsa-TOB2_0008	1.1e-35	1713
hsa-ITPKB_0034	1.1e-35	931
hsa-RP11-544M22_0001	1.2e-35	1828
hsa_circ_0062925	1.2e-35	20840
hsa-intergenic_019610	1.2e-35	522
hsa_circ_0110665	1.2e-35	28734
hsa_circ_0012863	1.2e-35	74122
hsa_circ_0122430	1.2e-35	74696
hsa_circ_0131445	1.2e-35	28743
hsa_circ_0073029	1.2e-35	28789
hsa_circ_0126565	1.2e-35	9007
hsa-PAPD5_0014	1.2e-35	1144
hsa_circ_0062461	1.2e-35	79001
hsa_circ_0000003	1.2e-35	29313
hsa_circ_0106443	1.2e-35	4421
hsa-ARID1A_0051	1.3e-35	1312
hsa_circ_0102827	1.3e-35	62439
hsa_circ_0124053	1.3e-35	4915
hsa_circ_0000892	1.3e-35	72393
hsa_circ_0102826	1.3e-35	63107
hsa_circ_0120137	1.3e-35	44096
hsa_circ_0099124	1.3e-35	19941
hsa-TOB2_0003	1.3e-35	1839
hsa-RP11-941H19_0008	1.3e-35	1889
hsa_circ_0122431	1.3e-35	78951
hsa-ANKRD16_0011	1.3e-35	429
hsa-TFAP2E_0003	1.4e-35	1828
hsa-USP37_0173	1.4e-35	1426
hsa_circ_0045221	1.4e-35	7235
TC-hsa-FGFR1OP_0037	1.4e-35	9330
hsa-WDR70_0052	1.4e-35	1724
hsa-GLS2_0006	1.4e-35	1440
hsa_circ_0131301	1.4e-35	9471
hsa_circ_0049511	1.4e-35	24274
hsa-RASSF3_0004	1.4e-35	1902
hsa-ADSL_0022	1.4e-35	983
hsa_circ_0131463	1.4e-35	74396
hsa-ZKSCAN5_0018	1.5e-35	1591
hsa_circ_0105984	1.5e-35	37288
hsa_circ_0051491	1.5e-35	55898
hsa_circ_0024985	1.5e-35	43029
hsa_circ_0024325	1.5e-35	39560
hsa_circ_0115094	1.5e-35	32304
hsa-CNNM4_0003	1.5e-35	1370
hsa_circ_0122426	1.5e-35	82766
hsa_circ_0008422	1.5e-35	936538
hsa_circ_0113057	1.5e-35	51253
hsa_circ_0124054	1.5e-35	5369
hsa-NFAT5_0062	1.5e-35	1565
hsa-PMS2_0055	1.5e-35	1347
hsa_circ_0010022	1.5e-35	36723
hsa-RIN3_0026	1.6e-35	1089
hsa_circ_0103150	1.6e-35	47971
hsa_circ_0109060	1.6e-35	25512
hsa_circ_0126365	1.6e-35	56575
hsa_circ_0089772	1.6e-35	15226
hsa_circ_0103060	1.6e-35	7593
hsa-CTC-499B15_0010	1.6e-35	1713
hsa_circ_0010017	1.6e-35	37238
hsa-DNAJC1_0049	1.6e-35	1098
hsa_circ_0006766	1.6e-35	977630
hsa_circ_0110940	1.6e-35	48427
hsa_circ_0134599	1.6e-35	33445
hsa_circ_0110941	1.6e-35	48632
hsa_circ_0000004	1.6e-35	33847
hsa_circ_0098930	1.6e-35	4493
TC-hsa-PDDC1_0001	1.7e-35	3814
hsa-NAA25_0122	1.7e-35	1699
hsa_circ_0116391	1.7e-35	26988
hsa_circ_0001339	1.7e-35	11525
hsa_circ_0007702	1.7e-35	851632
hsa-WRAP53_0005	1.7e-35	1112
hsa_circ_0000005	1.7e-35	49639
hsa-PPP1CC_0016	1.7e-35	1318
hsa-intergenic_021350	1.7e-35	1768
hsa_circ_0040208	1.7e-35	29208
hsa-RFTN2_0022	1.7e-35	1311
hsa_circ_0130859	1.7e-35	10094
hsa_circ_0104994	1.7e-35	7592
hsa_circ_0002937	1.7e-35	866351
hsa_circ_0140136	1.7e-35	12148
hsa_circ_0120842	1.8e-35	43790
hsa_circ_0098931	1.8e-35	4688
hsa-intergenic_040326	1.8e-35	456
hsa_circ_0062460	1.8e-35	97076
hsa_circ_0062459	1.8e-35	97097
hsa_circ_0120138	1.8e-35	52381
hsa_circ_0120040	1.9e-35	75791
hsa_circ_0138364	1.9e-35	44774
hsa_circ_0101302	1.9e-35	7784
hsa_circ_0006922	1.9e-35	2946
hsa_circ_0062498	1.9e-35	70088
hsa_circ_0137322	1.9e-35	60233
hsa_circ_0101636	1.9e-35	54846
hsa_circ_0064614	1.9e-35	4002
hsa_circ_0065488	1.9e-35	13662
hsa_circ_0113755	1.9e-35	75157
hsa-TRAPPC5_0002	1.9e-35	790
hsa_circ_0114510	1.9e-35	40523
hsa_circ_0030282	1.9e-35	22156
hsa_circ_0109961	1.9e-35	20047
hsa-SKIL_0020	2e-35	1754
hsa-UBOX5-AS1_0007	2e-35	1931
hsa_circ_0104251	2e-35	22956
hsa_circ_0047093	2e-35	37028
hsa_circ_0100257	2e-35	47849
hsa_circ_0100632	2e-35	53555
hsa_circ_0103865	2e-35	93363
hsa_circ_0024652	2e-35	6716
hsa_circ_0038427	2e-35	20483
hsa_circ_0060167	2e-35	29978
hsa_circ_0047094	2e-35	37535
hsa_circ_0107498	2.1e-35	34450
hsa-CUTC_0007	2.1e-35	1110
hsa-intergenic_002217	2.1e-35	1348
hsa_circ_0109058	2.1e-35	29544
hsa_circ_0008436	2.1e-35	21084
hsa_circ_0131464	2.1e-35	89888
hsa_circ_0129083	2.1e-35	28974
hsa_circ_0057747	2.1e-35	3431
hsa-EXOC6B_0177	2.1e-35	1755
hsa_circ_0048968	2.1e-35	59552
hsa-TIMM50_0002	2.1e-35	834
hsa_circ_0128855	2.2e-35	14839
hsa_circ_0026133	2.2e-35	38709
hsa-intergenic_015065	2.2e-35	1399
hsa_circ_0009129	2.2e-35	1457875
hsa_circ_0099102	2.2e-35	2092
hsa_circ_0126145	2.2e-35	32360
hsa_circ_0132277	2.2e-35	6844
hsa_circ_0097706	2.2e-35	5302
hsa-RHOA_0012	2.3e-35	1500
hsa_circ_0006368	2.3e-35	1165365
hsa_circ_0098801	2.3e-35	15001
hsa_circ_0008161	2.3e-35	7782
hsa-FAM174B_0006	2.3e-35	1832
hsa_circ_0078822	2.3e-35	20770
hsa-METTL16_0070	2.3e-35	776
hsa_circ_0107000	2.3e-35	7135
hsa_circ_0004454	2.3e-35	9276
hsa_circ_0126274	2.4e-35	20142
hsa-EIF4E_0014	2.4e-35	1953
hsa-MBTD1_0060	2.4e-35	858
hsa_circ_0129124	2.4e-35	63328
hsa_circ_0000046	2.4e-35	12456
hsa_circ_0137117	2.4e-35	86878
hsa_circ_0139718	2.4e-35	60151
hsa-WDR12_0023	2.4e-35	1837
hsa_circ_0097253	2.4e-35	51207
hsa_circ_0011819	2.4e-35	6709
hsa_circ_0097254	2.4e-35	51257
hsa_circ_0035054	2.4e-35	31913
hsa_circ_0061386	2.5e-35	41146
hsa_circ_0089797	2.5e-35	48581
hsa_circ_0134212	2.5e-35	9430
hsa_circ_0097244	2.5e-35	51526
hsa-intergenic_009044	2.5e-35	1506
hsa_circ_0099975	2.5e-35	87668
hsa-PRICKLE1_0013	2.5e-35	767
hsa_circ_0121533	2.5e-35	27433
hsa_circ_0132017	2.5e-35	24275
hsa_circ_0132018	2.5e-35	24392
hsa_circ_0114695	2.5e-35	20761
hsa_circ_0102008	2.5e-35	7649
hsa_circ_0112690	2.5e-35	54115
hsa_circ_0118904	2.5e-35	13709
hsa_circ_0138746	2.6e-35	39624
hsa_circ_0102571	2.6e-35	1550
hsa_circ_0099976	2.6e-35	90371
hsa_circ_0093181	2.6e-35	68099
hsa_circ_0015363	2.6e-35	14975
hsa_circ_0099977	2.7e-35	91141
hsa_circ_0121587	2.7e-35	12768
hsa_circ_0099978	2.7e-35	91370
hsa-NOL9_0027	2.7e-35	1842
hsa_circ_0136781	2.7e-35	6323
hsa_circ_0126272	2.8e-35	21831
hsa_circ_0004055	2.8e-35	266941
hsa_circ_0008588	2.8e-35	267000
hsa_circ_0007220	2.8e-35	267003
hsa-intergenic_006253	2.8e-35	1193
hsa_circ_0029015	2.8e-35	6460
hsa_circ_0126273	2.8e-35	21960
hsa_circ_0000218	2.8e-35	70570
hsa_circ_0116502	2.8e-35	86372
hsa-C19orf68_0007	2.9e-35	1229
hsa_circ_0002202	3e-35	98209
hsa_circ_0007999	3e-35	275876
hsa_circ_0008909	3e-35	275906
hsa_circ_0008862	3e-35	275921
hsa_circ_0002667	3e-35	275935
hsa_circ_0002098	3e-35	275938
hsa-RP11-435I10.4_0001	3e-35	1571
hsa_circ_0004588	3e-35	276871
hsa-DESI1_0008	3e-35	196
hsa_circ_0029014	3e-35	6687
hsa-TPT1-AS1_0075	3e-35	1834
hsa_circ_0097577	3e-35	96727
hsa_circ_0096802	3e-35	24002
hsa-MED1_0053	3e-35	1265
hsa-FOXK2_0032	3e-35	1987
hsa-TAF4B_0060	3e-35	1013
hsa_circ_0029013	3e-35	6749
hsa_circ_0038028	3.1e-35	10059
hsa_circ_0111529	3.1e-35	5811
hsa_circ_0108964	3.1e-35	20653
hsa_circ_0113800	3.1e-35	4919
hsa_circ_0029011	3.1e-35	6815
hsa-TTC19_0024	3.1e-35	1044
hsa_circ_0097712	3.2e-35	6325
hsa_circ_0097702	3.2e-35	6349
hsa_circ_0098745	3.2e-35	12741
hsa_circ_0097713	3.2e-35	6369
hsa_circ_0097651	3.2e-35	47379
hsa-RBM4_0022	3.3e-35	850
hsa_circ_0113203	3.3e-35	20137
hsa_circ_0107384	3.3e-35	52206
hsa_circ_0107383	3.3e-35	52278
hsa_circ_0008067	3.3e-35	7518
hsa_circ_0114701	3.3e-35	23835
hsa-B9D1_0010	3.3e-35	1005
hsa-MAPK9_0068	3.4e-35	1488
hsa_circ_0108963	3.4e-35	21646
hsa_circ_0114685	3.4e-35	24141
hsa_circ_0097707	3.4e-35	6567
hsa_circ_0103693	3.5e-35	66236
hsa-intergenic_027852	3.5e-35	1803
hsa_circ_0062469	3.5e-35	504699
hsa_circ_0104834	3.5e-35	20284
hsa-CCDC125_0048	3.5e-35	1437
hsa_circ_0029003	3.6e-35	7297
hsa_circ_0062467	3.6e-35	507204
hsa_circ_0129925	3.6e-35	29510
hsa_circ_0122320	3.6e-35	12410
hsa_circ_0008180	3.7e-35	38818
hsa_circ_0128802	3.7e-35	50499
hsa-SCNN1D_0007	3.7e-35	1336
hsa_circ_0001611	3.7e-35	38290
hsa_circ_0018757	3.7e-35	119318
hsa-RAB11FIP3_0071	3.7e-35	1148
hsa_circ_0018758	3.7e-35	120076
hsa_circ_0103982	3.7e-35	18660
hsa_circ_0105612	3.7e-35	39977
hsa_circ_0103983	3.7e-35	18694
hsa_circ_0009080	3.8e-35	202099
hsa_circ_0008845	3.8e-35	202113
hsa_circ_0002819	3.8e-35	202116
hsa_circ_0121405	3.8e-35	65097
hsa_circ_0028998	3.8e-35	7510
hsa_circ_0121861	3.8e-35	19620
hsa_circ_0096967	3.8e-35	20146
hsa_circ_0094109	3.8e-35	21461
hsa_circ_0089801	3.8e-35	133803
hsa_circ_0109629	3.8e-35	21071
hsa-RNF38_0038	3.8e-35	1725
hsa_circ_0062472	3.9e-35	529314
hsa_circ_0104715	3.9e-35	28755
hsa_circ_0133735	3.9e-35	26625
TC-hsa-RNF115_0001	3.9e-35	4737
hsa_circ_0088126	3.9e-35	51629
hsa_circ_0006833	3.9e-35	511323
hsa_circ_0135736	3.9e-35	5556
hsa_circ_0006481	3.9e-35	511703
hsa-ABRACL_0001	3.9e-35	947
hsa-GTF2IRD1_0035	3.9e-35	1288
hsa_circ_0042990	3.9e-35	15252
hsa-R3HDM4_0006	4e-35	1530
hsa-HAX1_0004	4e-35	988
hsa-ULK2_0088	4e-35	1343
hsa_circ_0031578	4e-35	2680
hsa_circ_0109551	4e-35	26876
hsa_circ_0113334	4e-35	20459
hsa-SRSF4_0017	4e-35	1736
hsa_circ_0058908	4e-35	62442
hsa-MAPK9_0067	4e-35	1631
hsa_circ_0088123	4.1e-35	52693
hsa-STAT2_0016	4.1e-35	1460
hsa_circ_0126268	4.1e-35	26582
hsa_circ_0101719	4.1e-35	7871
hsa_circ_0003689	4.1e-35	210989
hsa_circ_0003616	4.1e-35	211032
hsa_circ_0008088	4.1e-35	211034
hsa_circ_0006066	4.1e-35	211048
hsa_circ_0005215	4.1e-35	211051
hsa-MAPK10_0065	4.1e-35	496
hsa_circ_0126269	4.1e-35	26665
hsa-AP002884.2_0002	4.1e-35	1526
hsa_circ_0126270	4.1e-35	26765
hsa_circ_0052305	4.2e-35	37237
hsa_circ_0126271	4.2e-35	26894
hsa-intergenic_003287	4.2e-35	1650
hsa_circ_0129082	4.2e-35	5481
hsa_circ_0122774	4.2e-35	24409
hsa_circ_0109271	4.2e-35	6860
hsa-ZBTB8OS_0037	4.2e-35	1767
TC-hsa-RNF115_0002	4.2e-35	4946
hsa-RP11-166B2_0002	4.3e-35	1835
hsa_circ_0123326	4.3e-35	15808
hsa_circ_0114611	4.3e-35	36136
hsa-GPN2_0005	4.3e-35	1638
hsa-MAVS_0012	4.3e-35	1802
hsa-ASPHD1_0012	4.3e-35	422
hsa_circ_0007253	4.4e-35	31400
hsa_circ_0031772	4.4e-35	218630
hsa-intergenic_016579	4.4e-35	1883
TC-hsa-RNF115_0003	4.4e-35	5063
hsa_circ_0003257	4.5e-35	16568
hsa-PARP16_0030	4.5e-35	1437
hsa_circ_0089804	4.5e-35	75778
hsa_circ_0049510	4.5e-35	43665
hsa-RNF31_0004	4.6e-35	1201
hsa_circ_0097703	4.6e-35	7614
hsa_circ_0104411	4.6e-35	63672
hsa_circ_0109580	4.6e-35	11032
hsa_circ_0078837	4.7e-35	52452
hsa-MYOF_0105	4.7e-35	829
hsa_circ_0003581	4.7e-35	1431851
hsa_circ_0128600	4.7e-35	15335
hsa_circ_0064615	4.7e-35	6344
hsa_circ_0044179	4.7e-35	61622
hsa-GNG7_0046	4.8e-35	1494
hsa-intergenic_021260	4.8e-35	1635
hsa-NDUFS5_0013	4.8e-35	1751
hsa_circ_0093243	4.8e-35	28149
hsa_circ_0105395	4.8e-35	23555
hsa_circ_0133322	4.8e-35	48887
hsa_circ_0040390	4.8e-35	17996
hsa_circ_0116846	4.8e-35	15825
hsa_circ_0103436	4.8e-35	6032
hsa_circ_0093244	4.9e-35	28375
hsa_circ_0106524	4.9e-35	15252
hsa_circ_0021630	4.9e-35	20083
hsa_circ_0128420	4.9e-35	35457
hsa_circ_0128512	5e-35	91008
hsa_circ_0112689	5e-35	76058
hsa_circ_0009060	5e-35	404690
hsa_circ_0109307	5.1e-35	2735
hsa_circ_0089802	5.1e-35	92230
hsa_circ_0095979	5.1e-35	46293
hsa_circ_0062491	5.1e-35	116861
hsa_circ_0121865	5.2e-35	4663
hsa_circ_0062465	5.2e-35	611623
hsa_circ_0129905	5.2e-35	59950
hsa_circ_0004939	5.2e-35	5958
hsa_circ_0115812	5.2e-35	13016
hsa_circ_0124560	5.3e-35	44285
hsa_circ_0114702	5.3e-35	30039
hsa-LMAN2L_0010	5.3e-35	605
hsa_circ_0110633	5.3e-35	1599
hsa_circ_0103059	5.3e-35	14042
hsa_circ_0003473	5.3e-35	158565
hsa_circ_0101154	5.3e-35	7207
hsa_circ_0104995	5.4e-35	13397
hsa_circ_0049508	5.4e-35	47753
hsa_circ_0021865	5.4e-35	3635
hsa_circ_0044191	5.5e-35	130815
hsa_circ_0003329	5.5e-35	16148
hsa_circ_0080464	5.5e-35	24460
hsa-RP11-146B14_0044	5.5e-35	926
hsa-RP11-701H24.9_0015	5.5e-35	1689
hsa_circ_0005343	5.5e-35	425639
hsa_circ_0032494	5.5e-35	2113
hsa_circ_0006361	5.5e-35	13495
circ_CERS4_0003	5.5e-35	1669
hsa_circ_0018742	5.6e-35	2935
hsa_circ_0089812	5.6e-35	6018
hsa_circ_0080879	5.6e-35	62276
hsa_circ_0112688	5.6e-35	80448
hsa_circ_0080878	5.6e-35	62414
hsa_circ_0105985	5.6e-35	73760
hsa_circ_0102355	5.6e-35	18209
hsa_circ_0101155	5.6e-35	7399
hsa_circ_0062496	5.6e-35	122441
hsa_circ_0080877	5.6e-35	62719
hsa_circ_0127866	5.7e-35	29590
hsa_circ_0133346	5.7e-35	37986
hsa_circ_0129266	5.7e-35	49809
hsa_circ_0099743	5.7e-35	16553
hsa-SELO_0008	5.7e-35	1142
hsa_circ_0002132	5.8e-35	49225
hsa_circ_0112452	5.8e-35	50487
hsa-intergenic_007266	5.8e-35	1518
hsa_circ_0139367	5.8e-35	4774
hsa_circ_0025468	5.8e-35	225177
hsa_circ_0005675	5.8e-35	32951
hsa_circ_0114455	5.8e-35	5372
hsa-PPP1CB_0058	5.9e-35	1812
hsa_circ_0082725	6e-35	39624
hsa_circ_0045738	6e-35	15896
hsa-CTC-435M10_0020	6e-35	521
hsa_circ_0118682	6e-35	13611
hsa_circ_0075130	6e-35	24319
hsa_circ_0031850	6.1e-35	15518
hsa_circ_0094110	6.1e-35	27163
hsa_circ_0003466	6.1e-35	36032
hsa_circ_0129419	6.1e-35	34229
hsa_circ_0086698	6.1e-35	14876
hsa-intergenic_027366	6.1e-35	1986
hsa_circ_0012221	6.2e-35	24000
hsa-CTDNEP1_0006	6.2e-35	637
hsa_circ_0115268	6.2e-35	43381
hsa_circ_0002911	6.2e-35	24562
hsa-FAM35A_0028	6.2e-35	1315
hsa_circ_0109954	6.2e-35	68022
hsa_circ_0130999	6.2e-35	14092
hsa_circ_0100258	6.3e-35	85215
hsa_circ_0000934	6.3e-35	27103
hsa_circ_0062466	6.3e-35	676065
hsa_circ_0045735	6.3e-35	16349
hsa_circ_0112959	6.3e-35	5503
hsa_circ_0038029	6.4e-35	14542
hsa-MKL1_0089	6.4e-35	1696
hsa_circ_0050292	6.4e-35	11831
hsa-CCDC125_0045	6.4e-35	857
hsa_circ_0112687	6.4e-35	86429
hsa-DNAJC11_0012	6.4e-35	318
hsa_circ_0055902	6.5e-35	7347
hsa_circ_0064616	6.5e-35	7434
hsa_circ_0099666	6.5e-35	49691
hsa_circ_0004601	6.5e-35	238787
hsa_circ_0112230	6.6e-35	7104
hsa-JARID2_0118	6.6e-35	1668
hsa_circ_0062480	6.6e-35	242132
hsa_circ_0111059	6.7e-35	29137
hsa_circ_0133232	6.7e-35	76804
hsa_circ_0094475	6.7e-35	73568
hsa_circ_0094476	6.8e-35	73623
hsa_circ_0096771	6.8e-35	16258
hsa_circ_0100259	6.8e-35	88661
hsa_circ_0011416	6.8e-35	109865
hsa_circ_0115049	6.8e-35	5455
hsa-QTRT1_0010	6.8e-35	1458
hsa-EMP2_0013	6.8e-35	1684
hsa_circ_0011417	6.8e-35	110123
hsa_circ_0001146	6.9e-35	5487
hsa_circ_0100260	6.9e-35	89482
hsa_circ_0119226	6.9e-35	21118
hsa_circ_0089810	6.9e-35	6713
hsa_circ_0104558	6.9e-35	20576
hsa_circ_0139812	7e-35	24541
hsa_circ_0052591	7e-35	43280
hsa-JARID2_0115	7e-35	1712
hsa_circ_0089798	7e-35	182282
hsa_circ_0027814	7.1e-35	29862
hsa_circ_0003833	7.1e-35	250425
hsa_circ_0132842	7.1e-35	17087
hsa_circ_0136039	7.1e-35	25312
hsa-RAB11FIP1_0009	7.2e-35	590
hsa_circ_0002907	7.2e-35	13209
hsa_circ_0137707	7.2e-35	21576
hsa-GRAP2_0007	7.3e-35	1243
hsa_circ_0005834	7.3e-35	10321
hsa_circ_0001693	7.3e-35	11493
hsa_circ_0044213	7.3e-35	39573
hsa_circ_0039972	7.3e-35	6351
hsa_circ_0011671	7.4e-35	37047
hsa_circ_0006625	7.4e-35	253735
hsa_circ_0007025	7.4e-35	828671
hsa_circ_0007447	7.5e-35	832549
hsa_circ_0107574	7.5e-35	34336
hsa_circ_0137705	7.5e-35	21962
TC-hsa-HELB_0013	7.5e-35	6040
hsa_circ_0105968	7.5e-35	32335
hsa_circ_0034729	7.5e-35	40091
hsa-AC104634_0001	7.5e-35	1946
hsa_circ_0005146	7.5e-35	835819
hsa_circ_0094291	7.6e-35	13936
hsa-SCAI_0063	7.6e-35	1097
hsa_circ_0005896	7.6e-35	838523
hsa_circ_0137766	7.6e-35	37072
hsa_circ_0072813	7.6e-35	838926
hsa_circ_0111093	7.6e-35	92708
hsa_circ_0078962	7.6e-35	5421
hsa_circ_0137767	7.6e-35	37109
hsa_circ_0027246	7.6e-35	35257
hsa_circ_0105833	7.6e-35	12630
hsa-NRXN3_0067	7.6e-35	1303
hsa_circ_0003801	7.6e-35	842413
hsa-MRPS31_0014	7.7e-35	862
hsa_circ_0004545	7.7e-35	843325
hsa_circ_0003174	7.7e-35	843451
hsa_circ_0045736	7.7e-35	18035
hsa_circ_0008723	7.7e-35	843648
hsa_circ_0101706	7.7e-35	53969
hsa_circ_0072810	7.7e-35	846530
hsa_circ_0100261	7.7e-35	94744
hsa_circ_0094292	7.7e-35	14099
hsa_circ_0007498	7.8e-35	849687
hsa_circ_0101717	7.8e-35	19750
hsa-MACF1_0221	7.8e-35	1370
hsa_circ_0111596	7.8e-35	31146
hsa_circ_0072811	7.8e-35	851140
hsa_circ_0079396	7.8e-35	3905
hsa-CCND3_0059	7.9e-35	1178
hsa_circ_0044187	7.9e-35	157268
hsa_circ_0004932	7.9e-35	855654
hsa_circ_0122589	7.9e-35	32922
hsa_circ_0005159	8e-35	859766
hsa_circ_0131469	8e-35	40792
hsa_circ_0075817	8e-35	40876
hsa-PARD3_0231	8.1e-35	885
hsa_circ_0119512	8.2e-35	38672
hsa-CCDC94_0006	8.3e-35	734
hsa_circ_0062183	8.3e-35	96138
hsa_circ_0080978	8.3e-35	146122
hsa-KLC1_0098	8.4e-35	1974
hsa_circ_0067220	8.4e-35	32540
hsa-RABEP1_0081	8.4e-35	315
hsa_circ_0137768	8.5e-35	39252
hsa_circ_0054605	8.6e-35	3761
hsa_circ_0100248	8.6e-35	51348
hsa-SYMPK_0053	8.6e-35	801
hsa_circ_0019374	8.6e-35	46658
hsa_circ_0127242	8.7e-35	22859
hsa_circ_0127243	8.7e-35	22864
hsa_circ_0124390	8.8e-35	59402
hsa_circ_0131467	8.8e-35	42934
hsa_circ_0000965	8.8e-35	3447
hsa_circ_0131468	8.8e-35	43018
hsa-intergenic_019759	8.9e-35	281
hsa_circ_0034184	8.9e-35	167259
hsa_circ_0137917	8.9e-35	48749
hsa_circ_0014873	8.9e-35	24444
hsa_circ_0013640	8.9e-35	14701
hsa-ANKRD17_0095	8.9e-35	1714
hsa_circ_0105061	9e-35	24764
hsa-H2AFY2_0015	9e-35	1941
hsa_circ_0138994	9.2e-35	82670
hsa_circ_0049513	9.2e-35	2625
hsa_circ_0050270	9.2e-35	6643
hsa_circ_0127240	9.2e-35	23600
hsa_circ_0112820	9.3e-35	10804
hsa-CACNB4_0035	9.3e-35	1251
hsa_circ_0134622	9.3e-35	22088
hsa-intergenic_006730	9.3e-35	772
hsa_circ_0099151	9.3e-35	27065
hsa-PTPN9_0074	9.3e-35	966
hsa_circ_0044176	9.3e-35	25109
hsa_circ_0035409	9.3e-35	157957
hsa-FAM76A_0012	9.4e-35	1040
hsa_circ_0130313	9.4e-35	18677
hsa_circ_0099602	9.4e-35	34522
hsa-PYGM_0040	9.5e-35	1958
hsa_circ_0035407	9.5e-35	158971
hsa_circ_0035406	9.5e-35	116285
hsa-PPIL2_0019	9.5e-35	1555
hsa_circ_0095248	9.6e-35	29202
hsa_circ_0107201	9.6e-35	60832
hsa_circ_0127239	9.7e-35	24185
hsa_circ_0122775	9.7e-35	37219
hsa_circ_0111944	9.7e-35	29489
hsa_circ_0064498	9.8e-35	35373
hsa_circ_0100556	9.8e-35	88947
hsa_circ_0137780	9.9e-35	20496
hsa_circ_0091210	9.9e-35	118901
hsa_circ_0133594	9.9e-35	12131
hsa-CELF1_0179	9.9e-35	1312
hsa-PLPP1_0087	9.9e-35	1114
hsa_circ_0060046	9.9e-35	71863
hsa_circ_0007502	9.9e-35	89460
hsa_circ_0006562	9.9e-35	89463
hsa_circ_0060045	1e-34	71988
hsa-GLOD5_0003	1e-34	1673
TC-hsa-TMOD3_0038	1e-34	4686
hsa_circ_0064627	1e-34	27926
hsa_circ_0018306	1e-34	42752
TC-hsa-TMOD3_0036	1e-34	4712
hsa_circ_0094526	1e-34	76778
hsa-intergenic_009273	1e-34	1619
hsa_circ_0005911	1e-34	436489
hsa_circ_0081371	1e-34	109736
hsa_circ_0121041	1e-34	85365
hsa-KANSL1_0146	1.1e-34	1576
hsa_circ_0097354	1.1e-34	39214
hsa_circ_0080357	1.1e-34	158037
hsa_circ_0128750	1.1e-34	34010
hsa_circ_0109474	1.1e-34	3861
hsa_circ_0121042	1.1e-34	86518
hsa_circ_0096739	1.1e-34	71251
hsa-intergenic_020499	1.1e-34	1279
hsa_circ_0006152	1.1e-34	448675
hsa_circ_0127904	1.1e-34	19853
hsa_circ_0087834	1.1e-34	50009
hsa-intergenic_016668	1.1e-34	1681
hsa_circ_0101103	1.1e-34	27050
hsa_circ_0094455	1.1e-34	93936
hsa_circ_0092434	1.1e-34	14971
hsa_circ_0105180	1.1e-34	60055
hsa_circ_0087832	1.1e-34	50332
hsa-CS_0034	1.1e-34	1974
hsa_circ_0133338	1.1e-34	80209
hsa_circ_0100557	1.1e-34	94359
hsa_circ_0029402	1.1e-34	2566
hsa_circ_0131453	1.1e-34	28477
hsa_circ_0109308	1.1e-34	4053
hsa_circ_0119632	1.1e-34	13106
hsa_circ_0099434	1.1e-34	26936
hsa_circ_0035968	1.1e-34	33960
hsa_circ_0025763	1.1e-34	27739
hsa-ZDHHC20_0055	1.1e-34	712
hsa_circ_0134542	1.1e-34	1315
hsa_circ_0110141	1.1e-34	21136
hsa_circ_0003163	1.1e-34	1496422
hsa_circ_0021856	1.1e-34	5268
hsa_circ_0069216	1.1e-34	38286
hsa_circ_0055803	1.1e-34	37984
hsa_circ_0099344	1.1e-34	89634
hsa-CEP85_0047	1.1e-34	1410
hsa_circ_0089799	1.2e-34	234235
hsa-RPS6KB1_0057	1.2e-34	1660
hsa-RP11-447L10.1_0002	1.2e-34	1345
hsa_circ_0103158	1.2e-34	39827
hsa-VPS18_0011	1.2e-34	1799
hsa-DNAJB12_0007	1.2e-34	1011
hsa_circ_0106679	1.2e-34	51538
hsa_circ_0114883	1.2e-34	5816
hsa_circ_0110484	1.2e-34	9418
hsa_circ_0100558	1.2e-34	97317
hsa_circ_0100554	1.2e-34	97328
hsa_circ_0106545	1.2e-34	52074
hsa-LINC00957_0001	1.2e-34	902
hsa_circ_0001218	1.2e-34	34765
hsa_circ_0139813	1.2e-34	53590
hsa_circ_0122152	1.2e-34	37233
hsa_circ_0080465	1.2e-34	36139
hsa_circ_0080355	1.2e-34	167218
hsa-IFNGR2_0031	1.2e-34	1106
hsa-ATP6V0E1_0009	1.2e-34	1459
hsa_circ_0102666	1.2e-34	29279
hsa_circ_0038909	1.2e-34	21444
hsa_circ_0129752	1.2e-34	39818
hsa_circ_0134156	1.2e-34	34714
hsa_circ_0129339	1.2e-34	28301
hsa_circ_0128508	1.2e-34	48993
hsa_circ_0128507	1.2e-34	49030
hsa_circ_0130375	1.2e-34	41445
hsa_circ_0130602	1.2e-34	70804
hsa_circ_0125854	1.2e-34	9960
hsa_circ_0111951	1.2e-34	55008
hsa_circ_0112433	1.3e-34	9966
hsa-intergenic_017803	1.3e-34	1573
hsa_circ_0005448	1.3e-34	336644
hsa_circ_0130603	1.3e-34	71837
hsa_circ_0130604	1.3e-34	71852
hsa-CCND3_0070	1.3e-34	1821
hsa_circ_0031356	1.3e-34	16122
hsa_circ_0006198	1.3e-34	49119
hsa_circ_0109182	1.3e-34	7875
hsa_circ_0007742	1.3e-34	732598
hsa_circ_0094656	1.3e-34	49252
hsa_circ_0133339	1.3e-34	87205
hsa_circ_0112742	1.3e-34	29870
hsa_circ_0076407	1.3e-34	41006
hsa_circ_0095249	1.3e-34	34252
hsa_circ_0127970	1.3e-34	39350
hsa_circ_0137564	1.3e-34	66215
hsa_circ_0133347	1.3e-34	58325
hsa_circ_0021847	1.3e-34	5723
hsa-CHAF1B_0014	1.4e-34	411
hsa_circ_0104018	1.4e-34	27701
hsa-SELO_0013	1.4e-34	1376
hsa_circ_0087123	1.4e-34	19594
hsa_circ_0127068	1.4e-34	49447
hsa-CEP95_0065	1.4e-34	1347
hsa_circ_0099550	1.4e-34	82174
hsa_circ_0139731	1.4e-34	98860
hsa_circ_0139802	1.4e-34	15503
hsa_circ_0003422	1.4e-34	353077
hsa-OSBP2_0018	1.4e-34	1639
hsa-intergenic_003700	1.4e-34	1907
hsa_circ_0122215	1.4e-34	34504
hsa_circ_0113972	1.4e-34	29029
hsa_circ_0011522	1.4e-34	3783
hsa_circ_0105226	1.4e-34	8881
hsa-SNX10_0019	1.4e-34	1858
hsa_circ_0119739	1.4e-34	19703
hsa-SMG1_0075	1.4e-34	1388
hsa-PHYH_0024	1.4e-34	1269
hsa_circ_0007194	1.5e-34	391289
hsa-VPS13B_0213	1.5e-34	1190
hsa-MED24_0017	1.5e-34	1339
hsa_circ_0100577	1.5e-34	13631
hsa-CTD-2574D22_0003	1.5e-34	1937
hsa-USO1_0118	1.5e-34	902
hsa-intergenic_034597	1.5e-34	1983
hsa-ZDHHC9_0009	1.5e-34	1736
hsa_circ_0011520	1.5e-34	3856
hsa-PLA2G4C_0024	1.5e-34	1547
hsa-KIF13A_0135	1.5e-34	1362
hsa-LAMC1_0043	1.5e-34	1195
hsa-SNTB2_0045	1.5e-34	1930
hsa_circ_0128856	1.5e-34	43072
hsa-ZBTB44_0031	1.5e-34	1662
hsa_circ_0083793	1.5e-34	97732
hsa-TBC1D8_0064	1.6e-34	1651
hsa_circ_0128751	1.6e-34	41149
hsa-RAF1_0062	1.6e-34	994
hsa_circ_0011514	1.6e-34	25581
hsa_circ_0029542	1.6e-34	25607
hsa_circ_0098400	1.6e-34	15054
hsa_circ_0087948	1.6e-34	37813
hsa_circ_0094655	1.6e-34	54766
hsa_circ_0132284	1.6e-34	50574
hsa_circ_0097355	1.6e-34	48553
hsa-METTL5_0012	1.6e-34	1126
hsa-intergenic_027766	1.6e-34	612
hsa_circ_0100465	1.6e-34	12629
hsa-PLA2G4C_0040	1.6e-34	1196
hsa_circ_0003096	1.6e-34	823962
hsa-EPB41L4B_0045	1.7e-34	1035
hsa-GREB1L_0091	1.7e-34	1248
hsa_circ_0131637	1.7e-34	28953
hsa_circ_0042348	1.7e-34	6011
hsa-intergenic_012264	1.7e-34	801
hsa-ACSL4_0046	1.7e-34	1695
hsa_circ_0011518	1.7e-34	4098
hsa_circ_0038910	1.7e-34	647007
hsa-SRPK2_0043	1.7e-34	1769
hsa_circ_0131462	1.7e-34	12369
hsa_circ_0049763	1.7e-34	11654
hsa-TAPBP_0021	1.7e-34	1627
hsa_circ_0130992	1.7e-34	29093
hsa-MECP2_0042	1.7e-34	1948
hsa_circ_0002722	1.7e-34	17403
hsa_circ_0102155	1.7e-34	44653
hsa-FAM78A_0002	1.8e-34	1453
hsa_circ_0094100	1.8e-34	24132
hsa-PRKCI_0058	1.8e-34	1291
hsa_circ_0038907	1.8e-34	26007
hsa_circ_0036948	1.8e-34	62990
hsa_circ_0109270	1.8e-34	14166
hsa_circ_0110446	1.8e-34	32291
hsa_circ_0120877	1.8e-34	15696
hsa-RSBN1_0008	1.8e-34	1310
hsa-WDSUB1_0036	1.8e-34	1382
hsa_circ_0113518	1.8e-34	7932
hsa_circ_0100116	1.8e-34	53372
hsa_circ_0043601	1.8e-34	240662
hsa_circ_0116390	1.8e-34	16757
hsa_circ_0000694	1.8e-34	32548
hsa_circ_0043602	1.8e-34	242289
hsa_circ_0130932	1.9e-34	75548
hsa_circ_0081329	1.9e-34	22002
hsa-NUMB_0067	1.9e-34	1557
hsa_circ_0043603	1.9e-34	242759
hsa_circ_0000693	1.9e-34	32712
hsa_circ_0137782	1.9e-34	16758
hsa-CDK10_0012	1.9e-34	694
hsa_circ_0000750	1.9e-34	32184
hsa_circ_0043605	1.9e-34	244563
hsa_circ_0043604	1.9e-34	244944
hsa_circ_0106138	1.9e-34	9508
hsa-PARP15_0007	1.9e-34	1093
hsa_circ_0139951	1.9e-34	10680
hsa-MICAL3_0088	1.9e-34	1395
hsa_circ_0131669	1.9e-34	56250
hsa-TFPT_0003	1.9e-34	1951
hsa-intergenic_030804	1.9e-34	1835
hsa-UBE2F-SCLY_0031	1.9e-34	1542
hsa_circ_0127302	1.9e-34	41825
hsa-TERF2_0013	1.9e-34	605
hsa_circ_0116957	2e-34	11352
hsa-intergenic_013466	2e-34	1123
hsa_circ_0078886	2e-34	9418
hsa_circ_0078946	2e-34	9420
hsa_circ_0110140	2e-34	28066
hsa_circ_0114325	2e-34	15832
hsa_circ_0003427	2e-34	1210605
hsa_circ_0003420	2e-34	1211004
hsa_circ_0077432	2e-34	53577
hsa_circ_0116504	2e-34	23994
hsa-CASP8AP2_0025	2e-34	1545
hsa_circ_0115734	2e-34	8678
hsa_circ_0075773	2e-34	2512
hsa_circ_0050271	2e-34	9915
hsa_circ_0126491	2.1e-34	12554
hsa_circ_0062481	2.1e-34	235696
hsa_circ_0115735	2.1e-34	8763
hsa_circ_0081334	2.1e-34	23276
hsa_circ_0104235	2.1e-34	5343
hsa_circ_0081331	2.1e-34	23381
hsa_circ_0094448	2.1e-34	22228
hsa_circ_0121295	2.1e-34	16574
hsa-SASH1_0060	2.1e-34	1665
hsa_circ_0134591	2.1e-34	76113
hsa-SLC33A1_0025	2.1e-34	1374
hsa_circ_0105023	2.1e-34	40752
hsa-BISPR_0003	2.1e-34	1157
hsa-DIP2B_0141	2.1e-34	1615
hsa_circ_0075818	2.2e-34	25316
hsa_circ_0049764	2.2e-34	13081
hsa_circ_0063221	2.2e-34	12236
TC-hsa-TMOD3_0034	2.2e-34	6950
hsa_circ_0061239	2.2e-34	22663
hsa-CCZ1B_0016	2.2e-34	1108
hsa_circ_0063220	2.2e-34	12318
hsa_circ_0126356	2.2e-34	9771
hsa_circ_0026370	2.2e-34	27122
hsa_circ_0106383	2.2e-34	69369
hsa-TNFRSF10B_0006	2.2e-34	1402
hsa_circ_0096215	2.2e-34	2340
hsa_circ_0063219	2.2e-34	12430
hsa-STXBP1_0036	2.2e-34	1446
hsa-USP8_0062	2.3e-34	1078
hsa-WBP2_0002	2.3e-34	1058
hsa_circ_0111752	2.3e-34	46249
hsa_circ_0096872	2.3e-34	83793
hsa_circ_0054436	2.3e-34	142607
hsa-LEO1_0018	2.3e-34	1054
hsa-PRMT7_0016	2.3e-34	1266
hsa_circ_0138626	2.3e-34	41877
hsa_circ_0122785	2.3e-34	32984
hsa_circ_0137547	2.3e-34	32984
hsa_circ_0089771	2.3e-34	7488
hsa_circ_0137548	2.3e-34	32988
hsa_circ_0132019	2.3e-34	74771
hsa_circ_0132020	2.3e-34	74830
hsa_circ_0115464	2.3e-34	13693
hsa_circ_0063218	2.3e-34	12667
hsa_circ_0044175	2.3e-34	39827
hsa_circ_0128147	2.3e-34	43584
hsa_circ_0057008	2.3e-34	12980
hsa_circ_0126464	2.3e-34	75691
hsa-FGFR1OP_0078	2.3e-34	775
hsa-FBXO6_0006	2.3e-34	1481
hsa_circ_0063217	2.4e-34	12736
hsa_circ_0061236	2.4e-34	23519
hsa_circ_0005833	2.4e-34	120819
hsa_circ_0125892	2.4e-34	7718
hsa_circ_0110678	2.4e-34	70771
hsa_circ_0034021	2.4e-34	61802
hsa_circ_0126465	2.4e-34	76702
hsa_circ_0063215	2.4e-34	12881
hsa-CHFR_0093	2.4e-34	1111
hsa_circ_0100958	2.4e-34	66887
hsa_circ_0119351	2.4e-34	12243
hsa_circ_0128601	2.4e-34	35202
TC-hsa-TMOD3_0032	2.4e-34	7347
hsa-KDM2A_0091	2.5e-34	1715
hsa-EMSY_0072	2.5e-34	582
hsa-RAB35_0010	2.5e-34	454
hsa_circ_0102410	2.5e-34	28840
hsa-NDUFA13_0004	2.5e-34	1537
hsa_circ_0055804	2.5e-34	56484
hsa-CYCS_0005	2.5e-34	1852
hsa_circ_0135799	2.5e-34	81979
hsa_circ_0005409	2.5e-34	1359811
hsa-PCBP1-AS1_0098	2.5e-34	1793
hsa_circ_0116253	2.5e-34	36286
hsa_circ_0063214	2.5e-34	13252
hsa_circ_0105294	2.6e-34	25961
hsa_circ_0105269	2.6e-34	17147
hsa_circ_0076869	2.6e-34	29105
hsa_circ_0089813	2.6e-34	17901
hsa_circ_0046642	2.6e-34	53268
hsa-intergenic_028093	2.6e-34	1660
hsa_circ_0128461	2.6e-34	14319
hsa-ASCC1_0035	2.6e-34	1398
hsa-ISCA1_0002	2.6e-34	377
hsa-COPS3_0032	2.6e-34	1383
hsa_circ_0029734	2.6e-34	184927
hsa_circ_0032124	2.6e-34	136105
hsa_circ_0075774	2.6e-34	2859
hsa_circ_0126462	2.6e-34	30239
hsa_circ_0126463	2.6e-34	30242
hsa_circ_0092596	2.7e-34	46267
hsa_circ_0059686	2.7e-34	45915
hsa-FNBP4_0096	2.7e-34	759
hsa_circ_0007965	2.7e-34	1399348
hsa-intergenic_012013	2.7e-34	882
hsa_circ_0005639	2.7e-34	945592
hsa_circ_0122959	2.7e-34	5644
TC-hsa-TMOD3_0023	2.7e-34	7691
hsa_circ_0001217	2.7e-34	52676
hsa_circ_0114337	2.7e-34	18469
hsa_circ_0050289	2.7e-34	11417
hsa_circ_0109497	2.7e-34	14025
hsa_circ_0114338	2.7e-34	18595
hsa-TSFM_0004	2.7e-34	668
hsa_circ_0122432	2.7e-34	6042
hsa-CHFR_0076	2.8e-34	1182
hsa_circ_0013829	2.8e-34	541092
hsa_circ_0117958	2.8e-34	68785
hsa_circ_0131054	2.8e-34	20452
TC-hsa-SPPL2A_0001	2.8e-34	2898
hsa_circ_0132622	2.8e-34	25617
hsa_circ_0089811	2.8e-34	18596
hsa_circ_0023444	2.8e-34	6273
TC-hsa-TADA2A_0075	2.8e-34	2085
hsa-SETD2_0137	2.8e-34	1613
hsa_circ_0072827	2.8e-34	275244
hsa_circ_0127974	2.8e-34	9988
hsa_circ_0109762	2.8e-34	1561
hsa_circ_0113259	2.8e-34	58965
hsa_circ_0008374	2.8e-34	18571
hsa_circ_0121504	2.8e-34	50546
hsa_circ_0055538	2.8e-34	368628
hsa-SETD2_0129	2.8e-34	1621
hsa_circ_0122960	2.8e-34	5806
hsa_circ_0049690	2.8e-34	2387
hsa-SETD2_0158	2.8e-34	1624
hsa_circ_0122958	2.9e-34	5821
hsa_circ_0002960	2.9e-34	977500
hsa_circ_0138736	2.9e-34	5021
hsa_circ_0032523	2.9e-34	10774
hsa_circ_0110100	2.9e-34	75087
hsa_circ_0131291	2.9e-34	12686
hsa-MECP2_0013	2.9e-34	859
hsa_circ_0002865	2.9e-34	51137
hsa_circ_0008028	2.9e-34	1610160
hsa_circ_0023664	2.9e-34	58654
hsa_circ_0102646	2.9e-34	47775
hsa_circ_0003547	2.9e-34	1612653
hsa_circ_0002461	2.9e-34	1612818
hsa-FAM122B_0009	2.9e-34	1099
hsa_circ_0126748	2.9e-34	31226
hsa-NLRC5_0022	2.9e-34	1328
hsa_circ_0115923	2.9e-34	48903
hsa-KIAA0513_0023	2.9e-34	1511
hsa_circ_0104215	3e-34	7996
hsa_circ_0123323	3e-34	41858
hsa_circ_0112159	3e-34	61599
hsa_circ_0123324	3e-34	41913
hsa-PIAS2_0066	3e-34	1071
hsa_circ_0004347	3e-34	13264
hsa_circ_0134158	3e-34	38959
hsa_circ_0096216	3e-34	2712
hsa-NME5_0006	3e-34	1915
hsa_circ_0046641	3e-34	57850
hsa_circ_0109446	3e-34	16673
hsa-AFF3_0046	3.1e-34	1157
TC-hsa-SPPL2A_0002	3.1e-34	3058
hsa_circ_0032941	3.1e-34	59490
hsa_circ_0063388	3.1e-34	50571
hsa_circ_0044196	3.1e-34	20390
hsa_circ_0000695	3.1e-34	42512
hsa_circ_0017177	3.1e-34	148896
hsa_circ_0106790	3.1e-34	2738
hsa_circ_0044246	3.2e-34	9324
hsa_circ_0105236	3.2e-34	8787
hsa-ALDH1A2_0037	3.2e-34	1860
hsa_circ_0098052	3.2e-34	45519
hsa_circ_0126407	3.2e-34	13470
hsa-MDM2_0055	3.2e-34	817
circ_LRRFIP2_0011	3.2e-34	410
hsa-AGAP1_0219	3.2e-34	1874
hsa_circ_0044208	3.2e-34	20670
hsa-IP6K2_0019	3.2e-34	782
hsa_circ_0127869	3.2e-34	12645
TC-hsa-TADA2A_0071	3.2e-34	2240
hsa_circ_0010033	3.2e-34	11190
hsa_circ_0072829	3.2e-34	296025
hsa-SFXN1_0016	3.3e-34	1747
hsa_circ_0100753	3.3e-34	72357
hsa_circ_0059358	3.3e-34	12565
hsa-SLC11A2_0033	3.3e-34	1452
hsa_circ_0049689	3.3e-34	2564
hsa_circ_0123671	3.3e-34	5799
hsa_circ_0101648	3.3e-34	69940
hsa_circ_0109855	3.4e-34	28826
hsa_circ_0101894	3.4e-34	91001
hsa_circ_0128860	3.4e-34	56709
hsa-CALR_0004	3.4e-34	1727
hsa_circ_0115718	3.4e-34	8695
hsa-DNAJC7_0049	3.4e-34	1703
hsa-MTOR_0067	3.4e-34	1846
hsa_circ_0120383	3.4e-34	70795
hsa_circ_0140621	3.4e-34	51224
hsa_circ_0043314	3.4e-34	9691
hsa_circ_0106722	3.4e-34	2304
hsa_circ_0137563	3.4e-34	58578
hsa_circ_0109852	3.4e-34	29053
hsa_circ_0055801	3.4e-34	66057
hsa_circ_0053330	3.4e-34	30480
hsa_circ_0137549	3.4e-34	40311
hsa_circ_0043377	3.4e-34	2014
hsa_circ_0069749	3.4e-34	826926
hsa_circ_0076870	3.4e-34	33729
hsa_circ_0123669	3.4e-34	5931
hsa_circ_0131894	3.5e-34	26799
hsa_circ_0094325	3.5e-34	4837
hsa-PGPEP1_0007	3.5e-34	987
hsa_circ_0001711	3.5e-34	50064
hsa_circ_0009077	3.5e-34	27293
hsa_circ_0123670	3.5e-34	6008
hsa_circ_0088596	3.5e-34	81016
hsa-TAF15_0053	3.6e-34	888
hsa_circ_0098294	3.6e-34	7088
hsa_circ_0105698	3.6e-34	63758
hsa_circ_0115719	3.6e-34	8935
hsa_circ_0011611	3.6e-34	13823
hsa-MEIOB_0016	3.6e-34	1094
hsa-CCDC57_0056	3.6e-34	1393
hsa_circ_0138904	3.6e-34	27556
hsa_circ_0113207	3.6e-34	13895
hsa_circ_0110839	3.7e-34	22309
hsa-NPAT_0059	3.7e-34	863
hsa_circ_0105629	3.7e-34	7100
hsa_circ_0001241	3.7e-34	55789
hsa-ANAPC11_0001	3.7e-34	1804
hsa_circ_0086995	3.7e-34	14068
hsa_circ_0111463	3.7e-34	16438
hsa_circ_0011612	3.8e-34	14126
hsa-RELB_0022	3.8e-34	1533
hsa_circ_0137151	3.8e-34	40458
hsa_circ_0104615	3.8e-34	79072
hsa-ABHD18_0048	3.8e-34	1460
hsa_circ_0068564	3.8e-34	21148
hsa_circ_0008544	3.8e-34	12866
hsa-PHF21A_0054	3.8e-34	261
hsa_circ_0107611	3.8e-34	16516
hsa_circ_0006378	3.8e-34	32160
hsa-QRICH1_0034	3.8e-34	820
hsa_circ_0131514	3.9e-34	24388
hsa_circ_0033996	3.9e-34	356025
hsa_circ_0102237	3.9e-34	15097
hsa-KDM7A_0043	3.9e-34	669
hsa_circ_0008347	3.9e-34	353013
hsa_circ_0001242	3.9e-34	57654
hsa_circ_0046647	3.9e-34	22899
hsa_circ_0122068	3.9e-34	11671
hsa_circ_0131471	3.9e-34	5297
hsa_circ_0122790	4e-34	5836
hsa-RPL28_0001	4e-34	1157
hsa_circ_0029400	4e-34	27919
hsa_circ_0029399	4e-34	28025
hsa_circ_0001575	4.1e-34	20708
hsa_circ_0009681	4.1e-34	3198
hsa_circ_0131470	4.1e-34	5374
hsa_circ_0107279	4.1e-34	16110
hsa_circ_0115422	4.1e-34	14986
hsa-REL_0043	4.1e-34	1292
hsa_circ_0025023	4.2e-34	7659
hsa-UBE4B_0134	4.2e-34	1977
hsa_circ_0000938	4.2e-34	34957
hsa-DPY19L4_0084	4.2e-34	932
hsa-GCNT2_0023	4.2e-34	1619
hsa-ABHD15-AS1_0016	4.2e-34	910
hsa_circ_0122125	4.2e-34	28097
hsa_circ_0122126	4.2e-34	28149
hsa_circ_0078382	4.2e-34	233176
hsa_circ_0111044	4.3e-34	34034
hsa_circ_0086740	4.3e-34	5563
hsa-SEC24A_0130	4.3e-34	885
hsa_circ_0034000	4.3e-34	375533
hsa_circ_0129272	4.3e-34	52267
hsa_circ_0140495	4.3e-34	15494
hsa_circ_0116479	4.3e-34	8077
hsa_circ_0001243	4.3e-34	60646
hsa_circ_0140496	4.4e-34	15579
hsa_circ_0009487	4.4e-34	4288
hsa-intergenic_042961	4.4e-34	1812
hsa_circ_0123319	4.4e-34	51037
hsa_circ_0074699	4.4e-34	34501
hsa-ZNF609_0097	4.4e-34	1918
hsa-ZZEF1_0088	4.4e-34	829
hsa_circ_0127695	4.4e-34	20787
hsa_circ_0049687	4.4e-34	2979
hsa_circ_0136302	4.4e-34	6497
hsa_circ_0129904	4.4e-34	27612
TC-hsa-TADA2A_0049	4.4e-34	2624
hsa-CFAP161_0020	4.5e-34	1417
hsa_circ_0033493	4.5e-34	72902
hsa-CLIP2_0065	4.5e-34	1638
hsa_circ_0086996	4.5e-34	15491
hsa-C11orf49_0026	4.5e-34	1265
hsa_circ_0008109	4.5e-34	695069
hsa_circ_0004177	4.5e-34	695672
hsa_circ_0008611	4.5e-34	695882
hsa_circ_0074700	4.5e-34	35139
hsa_circ_0117339	4.6e-34	7596
hsa_circ_0096609	4.6e-34	54665
hsa_circ_0004434	4.6e-34	451492
hsa_circ_0005048	4.6e-34	470077
hsa_circ_0044091	4.6e-34	7390
hsa_circ_0104973	4.6e-34	4381
hsa-BORCS8-MEF2B_0008	4.6e-34	1715
hsa_circ_0004097	4.6e-34	471156
hsa_circ_0074696	4.6e-34	35428
hsa_circ_0128583	4.7e-34	3133
hsa_circ_0004986	4.7e-34	473958
hsa-LAPTM4A_0004	4.7e-34	1205
hsa_circ_0044092	4.7e-34	7466
hsa-WDR92_0019	4.7e-34	1556
hsa_circ_0029401	4.7e-34	20248
hsa_circ_0112795	4.7e-34	39638
hsa_circ_0009488	4.7e-34	4458
hsa-ZNF106_0053	4.7e-34	450
hsa_circ_0074697	4.7e-34	35937
hsa-KXD1_0007	4.8e-34	1804
hsa-ADSL_0026	4.8e-34	1557
hsa_circ_0115325	4.8e-34	53350
hsa_circ_0061306	4.8e-34	70602
hsa-CTD-2134A5_0001	4.8e-34	1396
hsa_circ_0112799	4.8e-34	40157
hsa-intergenic_016567	4.8e-34	1879
hsa-VPS26A_0015	4.8e-34	1366
hsa-CBFA2T2_0096	4.9e-34	1021
hsa_circ_0105295	4.9e-34	35893
circ_AC006511.6_0001	4.9e-34	2032
hsa_circ_0115387	4.9e-34	8817
hsa_circ_0044094	4.9e-34	7640
hsa_circ_0009489	4.9e-34	4547
hsa_circ_0044093	4.9e-34	7644
hsa-CINP_0019	4.9e-34	1229
hsa_circ_0074698	4.9e-34	36669
hsa_circ_0127718	5e-34	16682
hsa_circ_0047474	5e-34	17343
hsa_circ_0112019	5e-34	10003
hsa_circ_0120686	5e-34	6342
hsa_circ_0029555	5e-34	5107
hsa_circ_0086197	5e-34	236715
hsa-intergenic_010138	5e-34	1619
hsa_circ_0138862	5.1e-34	22208
hsa_circ_0102875	5.1e-34	41025
hsa_circ_0049686	5.1e-34	3177
TC-hsa-GNB4_0001	5.1e-34	4505
hsa_circ_0126859	5.1e-34	17485
hsa_circ_0086198	5.1e-34	237262
hsa_circ_0122786	5.1e-34	49154
hsa_circ_0135835	5.1e-34	58127
hsa_circ_0134958	5.2e-34	5275
hsa-PRPF3_0039	5.3e-34	1801
hsa-NPLOC4_0049	5.3e-34	901
hsa_circ_0114723	5.3e-34	18227
hsa_circ_0114326	5.3e-34	25872
hsa_circ_0101649	5.3e-34	88519
hsa-USP48_0096	5.3e-34	1869
hsa_circ_0121862	5.3e-34	13550
hsa_circ_0121863	5.3e-34	13553
hsa_circ_0103082	5.3e-34	27136
hsa-USP48_0095	5.3e-34	1876
hsa-PLAC9_0001	5.4e-34	1887
hsa-LINC00963_0009	5.4e-34	1996
hsa_circ_0009679	5.4e-34	3693
hsa_circ_0077585	5.4e-34	15527
hsa_circ_0001488	5.4e-34	86861
hsa_circ_0034281	5.4e-34	25157
hsa_circ_0127241	5.4e-34	9058
hsa-ACTR1A_0006	5.5e-34	1534
hsa_circ_0125661	5.5e-34	32120
hsa-KPNA2_0006	5.5e-34	727
hsa-GALM_0030	5.5e-34	995
hsa-CECR2_0031	5.5e-34	960
hsa_circ_0079763	5.5e-34	457371
hsa_circ_0116380	5.5e-34	45630
hsa_circ_0061246	5.5e-34	36186
hsa_circ_0061245	5.6e-34	36244
hsa_circ_0102537	5.6e-34	4249
hsa_circ_0076868	5.6e-34	84158
hsa_circ_0133321	5.6e-34	39109
hsa_circ_0120076	5.6e-34	7512
hsa_circ_0126366	5.6e-34	21602
hsa_circ_0125366	5.7e-34	8681
hsa_circ_0068063	5.7e-34	98116
hsa_circ_0105161	5.7e-34	19383
hsa_circ_0126367	5.7e-34	21672
hsa_circ_0108899	5.7e-34	33565
hsa-ZDHHC14_0034	5.8e-34	1955
hsa-KATNA1_0019	5.8e-34	1205
hsa-LIN52_0013	5.8e-34	967
hsa-SERP1_0001	5.8e-34	1051
hsa_circ_0137257	5.8e-34	21521
hsa-SRGAP1_0093	5.9e-34	611
hsa_circ_0121509	5.9e-34	83650
hsa_circ_0025824	5.9e-34	96408
hsa_circ_0006975	5.9e-34	44263
hsa_circ_0105974	5.9e-34	52058
hsa_circ_0101647	5.9e-34	93432
hsa_circ_0094454	5.9e-34	23131
hsa_circ_0101644	5.9e-34	31875
hsa_circ_0033997	6e-34	442732
hsa_circ_0125367	6e-34	8919
hsa-BCL2L13_0061	6e-34	1843
hsa_circ_0118921	6e-34	16167
hsa_circ_0007710	6.1e-34	9004
hsa-ADSL_0008	6.1e-34	1757
hsa_circ_0114872	6.1e-34	34564
hsa_circ_0134757	6.1e-34	30719
hsa-SLC27A5_0003	6.1e-34	843
hsa-GALM_0017	6.1e-34	1509
hsa_circ_0109884	6.1e-34	7327
hsa-AC100830.3_0001	6.2e-34	1798
hsa_circ_0033988	6.2e-34	453671
hsa_circ_0027245	6.3e-34	86232
hsa_circ_0006293	6.3e-34	7334
hsa-PRPF3_0053	6.3e-34	1968
hsa_circ_0114873	6.3e-34	35118
hsa_circ_0087424	6.3e-34	9948
hsa_circ_0027242	6.3e-34	86692
hsa_circ_0100208	6.3e-34	3685
hsa-UBE2K_0125	6.3e-34	1254
hsa-SPG7_0043	6.3e-34	786
hsa_circ_0087425	6.4e-34	9997
hsa_circ_0001476	6.4e-34	9731
hsa_circ_0005534	6.4e-34	30249
hsa_circ_0068042	6.4e-34	104347
hsa_circ_0117199	6.4e-34	28805
hsa-DLGAP1_0103	6.4e-34	1703
hsa_circ_0112800	6.4e-34	46453
hsa_circ_0006727	6.4e-34	16165
hsa_circ_0101645	6.5e-34	97936
hsa-RBM4_0028	6.5e-34	1291
hsa-MCU_0104	6.5e-34	1934
hsa_circ_0050102	6.5e-34	7064
hsa-EPB41_0150	6.5e-34	1739
hsa_circ_0109304	6.5e-34	40821
hsa-TRAC_0016	6.5e-34	1399
hsa-intergenic_028597	6.6e-34	1575
hsa_circ_0020118	6.6e-34	92807
hsa_circ_0139668	6.6e-34	15420
hsa_circ_0055550	6.6e-34	592527
hsa_circ_0005213	6.6e-34	16407
hsa-RBMS2_0014	6.6e-34	1600
hsa_circ_0129059	6.6e-34	9922
hsa-PAIP2_0029	6.7e-34	1647
hsa_circ_0123972	6.7e-34	20142
hsa_circ_0131290	6.7e-34	19391
hsa_circ_0061238	6.7e-34	39831
hsa_circ_0122844	6.7e-34	72357
hsa-WIPF2_0041	6.7e-34	974
hsa-AARSD1_0013	6.8e-34	817
hsa-QKI_0051	6.8e-34	1384
hsa_circ_0005234	6.8e-34	402813
hsa_circ_0076867	6.8e-34	92917
hsa-XPNPEP3_0078	6.8e-34	1877
hsa-UBAP2_0108	6.8e-34	1732
hsa_circ_0139512	6.8e-34	22025
hsa_circ_0068082	6.8e-34	5232
hsa_circ_0021111	6.9e-34	32150
hsa_circ_0060066	6.9e-34	15711
hsa_circ_0039926	6.9e-34	34421
hsa_circ_0091408	6.9e-34	16791
hsa-RAB11FIP3_0060	7e-34	1017
hsa_circ_0109940	7e-34	23252
hsa_circ_0002659	7e-34	357530
hsa-PRUNE1_0023	7.1e-34	1758
hsa_circ_0137323	7.1e-34	6731
hsa_circ_0055147	7.1e-34	60325
hsa-MSANTD3_0008	7.1e-34	1721
hsa_circ_0101502	7.2e-34	33803
hsa_circ_0138536	7.2e-34	94156
hsa-SMARCC1_0218	7.2e-34	1084
hsa-RP11-566K11_0003	7.2e-34	1062
hsa_circ_0037856	7.3e-34	97237
hsa-ARID1A_0032	7.3e-34	1299
hsa_circ_0073233	7.3e-34	52540
hsa-AMD1_0015	7.4e-34	907
hsa_circ_0098687	7.4e-34	55384
hsa-ZNF561_0014	7.4e-34	1880
hsa_circ_0068083	7.4e-34	5449
hsa_circ_0067128	7.4e-34	11486
hsa_circ_0006616	7.4e-34	11127
hsa_circ_0021861	7.4e-34	24981
hsa_circ_0000400	7.4e-34	55536
hsa_circ_0078342	7.5e-34	112651
hsa_circ_0117887	7.5e-34	13097
hsa-GIPC1_0003	7.5e-34	587
hsa_circ_0078341	7.5e-34	112856
hsa_circ_0102279	7.5e-34	26463
hsa-ENG_0011	7.5e-34	1354
hsa_circ_0100209	7.5e-34	4022
hsa_circ_0004141	7.5e-34	58368
hsa_circ_0078338	7.5e-34	113315
hsa_circ_0000955	7.5e-34	19592
hsa-PTCD1_0008	7.6e-34	1629
hsa_circ_0116952	7.6e-34	22424
hsa_circ_0021862	7.6e-34	25221
hsa_circ_0109369	7.6e-34	20069
TC-hsa-RBM43_0001	7.6e-34	2182
hsa-COPS7A_0005	7.6e-34	1376
hsa_circ_0043980	7.6e-34	6785
hsa_circ_0127870	7.6e-34	19583
hsa-PRKAG2_0092	7.7e-34	869
hsa_circ_0021863	7.7e-34	25464
hsa_circ_0139474	7.8e-34	59784
hsa_circ_0096606	7.8e-34	71521
hsa_circ_0101646	7.8e-34	61756
hsa-APOC1_0013	7.8e-34	1099
hsa_circ_0007197	7.9e-34	616981
hsa_circ_0116953	7.9e-34	22866
hsa-intergenic_015154	7.9e-34	1992
hsa_circ_0139475	7.9e-34	60348
hsa_circ_0026148	7.9e-34	74223
hsa_circ_0094293	7.9e-34	45571
hsa-RAPGEF1_0027	7.9e-34	1261
hsa_circ_0001548	8e-34	42282
hsa_circ_0068084	8e-34	5651
hsa_circ_0128744	8e-34	7197
hsa_circ_0020327	8e-34	45397
hsa_circ_0116954	8e-34	23003
hsa-SEC14L1_0041	8e-34	1907
hsa-C8orf44-SGK3_0046	8e-34	882
hsa_circ_0139476	8e-34	60687
hsa_circ_0101102	8e-34	58943
hsa_circ_0132692	8.1e-34	67054
hsa_circ_0104681	8.1e-34	69961
hsa_circ_0099006	8.1e-34	15012
hsa_circ_0068085	8.2e-34	5718
hsa-NEMF_0104	8.2e-34	1237
hsa_circ_0111302	8.2e-34	40713
hsa_circ_0101651	8.2e-34	31820
hsa_circ_0068269	8.2e-34	7624
hsa_circ_0111249	8.2e-34	40816
hsa_circ_0017266	8.2e-34	5444
hsa_circ_0000294	8.2e-34	24491
hsa_circ_0101652	8.3e-34	31941
hsa-CALR3_0005	8.3e-34	1546
hsa_circ_0111235	8.3e-34	40962
hsa_circ_0139505	8.3e-34	22513
hsa_circ_0006394	8.3e-34	310373
hsa_circ_0103887	8.3e-34	88987
hsa-RP11-3P22.2_0018	8.3e-34	910
hsa-PLPP1_0080	8.3e-34	421
hsa_circ_0111187	8.4e-34	41189
hsa_circ_0020328	8.4e-34	46578
hsa-SEC63_0087	8.4e-34	802
hsa_circ_0127390	8.4e-34	45168
hsa_circ_0097334	8.4e-34	9820
hsa_circ_0047786	8.5e-34	2683
hsa-CECR2_0043	8.5e-34	1462
hsa-ACAP1_0006	8.5e-34	752
hsa_circ_0117200	8.5e-34	33276
hsa_circ_0102872	8.6e-34	53710
hsa_circ_0029404	8.6e-34	33166
hsa-MKRN1_0036	8.7e-34	1280
hsa_circ_0123921	8.7e-34	5095
hsa_circ_0100714	8.7e-34	14104
hsa_circ_0044189	8.7e-34	77673
hsa_circ_0139672	8.7e-34	95445
hsa_circ_0102946	8.7e-34	29976
hsa_circ_0135381	8.8e-34	99061
hsa_circ_0108382	8.8e-34	13182
hsa_circ_0068086	8.8e-34	5945
hsa_circ_0140303	8.9e-34	25716
hsa_circ_0139393	8.9e-34	41361
hsa_circ_0007313	8.9e-34	20796
hsa_circ_0033967	9e-34	544476
hsa-LCK_0004	9e-34	1004
hsa-PPP1R13B_0074	9e-34	1440
hsa_circ_0135888	9e-34	20917
hsa_circ_0099973	9e-34	6614
hsa_circ_0068087	9.1e-34	6052
hsa_circ_0100709	9.1e-34	14476
hsa-EPB41L1_0042	9.2e-34	1694
hsa-ZFC3H1_0164	9.2e-34	1204
hsa_circ_0129948	9.2e-34	53520
hsa_circ_0093865	9.2e-34	74772
hsa_circ_0134861	9.2e-34	51366
hsa-ZNF276_0005	9.2e-34	691
hsa_circ_0108448	9.2e-34	93870
hsa_circ_0093745	9.2e-34	2868
hsa-YIPF4_0035	9.3e-34	1672
hsa_circ_0082890	9.3e-34	14190
hsa-ATG4D_0016	9.3e-34	1622
hsa-ZNF276_0008	9.3e-34	692
hsa_circ_0124473	9.3e-34	32382
hsa_circ_0100710	9.4e-34	14662
hsa_circ_0089814	9.4e-34	11997
hsa_circ_0136307	9.4e-34	10172
hsa-intergenic_009193	9.4e-34	747
hsa_circ_0119111	9.4e-34	4902
hsa_circ_0101217	9.5e-34	73700
hsa_circ_0131513	9.5e-34	38407
hsa_circ_0064013	9.5e-34	3456
hsa_circ_0068088	9.5e-34	6190
hsa-ZNF808_0017	9.6e-34	1763
hsa-RP11-449H3_0004	9.6e-34	1553
hsa_circ_0139950	9.6e-34	17464
hsa_circ_0127983	9.6e-34	18585
hsa-UBXN4_0051	9.7e-34	1175
hsa_circ_0127871	9.7e-34	22053
hsa_circ_0134228	9.7e-34	92280
hsa-BRI3_0004	9.7e-34	1251
hsa_circ_0116951	9.7e-34	25436
hsa_circ_0124486	9.7e-34	37080
hsa_circ_0102435	9.7e-34	17816
hsa-ERO1A_0025	9.8e-34	470
hsa_circ_0052307	9.8e-34	22248
hsa_circ_0132693	9.8e-34	74048
hsa_circ_0105799	9.8e-34	17118
hsa-TRIOBP_0036	9.8e-34	1921
hsa-MDM2_0067	9.9e-34	1414
hsa_circ_0106404	9.9e-34	14281
hsa_circ_0135391	9.9e-34	45994
hsa_circ_0138881	9.9e-34	26871
hsa_circ_0139066	1e-33	9340
hsa-TCF25_0045	1e-33	1794
hsa_circ_0139065	1e-33	9354
hsa-NELFA_0006	1e-33	1236
hsa_circ_0127053	1e-33	11844
hsa_circ_0118676	1e-33	9659
hsa_circ_0126854	1e-33	48315
hsa-RBPJ_0083	1e-33	653
hsa_circ_0097330	1e-33	10807
hsa_circ_0078873	1e-33	7632
hsa_circ_0100833	1e-33	15973
hsa_circ_0077693	1e-33	187265
hsa_circ_0138865	1e-33	31752
hsa_circ_0135433	1e-33	79318
hsa-intergenic_032081	1e-33	604
hsa-KAT6A_0073	1e-33	737
hsa_circ_0108699	1e-33	69258
hsa_circ_0110166	1e-33	15417
hsa_circ_0105020	1e-33	15793
hsa_circ_0112962	1e-33	14622
hsa_circ_0115426	1e-33	24060
hsa-PSEN1_0071	1.1e-33	940
hsa-GALM_0028	1.1e-33	1970
hsa-PMS2_0047	1.1e-33	1771
hsa-LSR_0030	1.1e-33	1630
hsa_circ_0105021	1.1e-33	15971
hsa-RP11-423H2_0006	1.1e-33	1576
hsa_circ_0072814	1.1e-33	16707
hsa-PSPC1_0059	1.1e-33	1085
hsa-IPO7_0092	1.1e-33	1419
hsa_circ_0007029	1.1e-33	30064
hsa-SH3D19_0036	1.1e-33	1968
hsa_circ_0106298	1.1e-33	4106
hsa_circ_0007774	1.1e-33	1397925
hsa_circ_0115922	1.1e-33	41075
hsa-CASC4_0024	1.1e-33	1964
hsa_circ_0032524	1.1e-33	21925
hsa_circ_0005920	1.1e-33	138643
hsa-ZBTB8OS_0039	1.1e-33	1923
hsa_circ_0130933	1.1e-33	22835
hsa_circ_0130934	1.1e-33	22840
hsa_circ_0081678	1.1e-33	9197
hsa_circ_0006071	1.1e-33	75251
hsa-POR_0005	1.1e-33	671
hsa-TBL1XR1_0178	1.1e-33	1172
hsa_circ_0114653	1.1e-33	8549
hsa_circ_0125494	1.1e-33	39251
hsa_circ_0109951	1.1e-33	29791
hsa-PHYHD1_0016	1.1e-33	1998
hsa-C5orf42_0202	1.1e-33	618
hsa_circ_0116813	1.1e-33	16609
hsa_circ_0117788	1.1e-33	35607
hsa_circ_0097337	1.1e-33	86348
hsa_circ_0093675	1.1e-33	12320
hsa_circ_0100957	1.1e-33	26913
hsa_circ_0094534	1.1e-33	84023
hsa-DGKG_0043	1.1e-33	1687
hsa-PTCD1_0020	1.1e-33	1998
hsa_circ_0134987	1.1e-33	38160
hsa_circ_0111171	1.1e-33	72523
hsa_circ_0055606	1.2e-33	9657
hsa_circ_0077662	1.2e-33	55858
hsa-PPM1B_0025	1.2e-33	1121
hsa_circ_0055605	1.2e-33	9721
hsa_circ_0111418	1.2e-33	41873
hsa_circ_0077660	1.2e-33	56094
hsa_circ_0078031	1.2e-33	290905
hsa_circ_0077658	1.2e-33	56191
hsa_circ_0092890	1.2e-33	8993
hsa_circ_0002295	1.2e-33	79940
hsa_circ_0077657	1.2e-33	56625
hsa-CANX_0107	1.2e-33	693
hsa_circ_0127878	1.2e-33	13417
hsa_circ_0103531	1.2e-33	14982
hsa_circ_0007533	1.2e-33	21344
hsa_circ_0098295	1.2e-33	13159
hsa_circ_0011166	1.2e-33	52987
hsa-intergenic_003412	1.2e-33	1869
hsa_circ_0104480	1.2e-33	21489
hsa_circ_0122202	1.2e-33	3229
hsa_circ_0029408	1.2e-33	19231
hsa_circ_0107954	1.2e-33	29392
hsa_circ_0120286	1.2e-33	90511
hsa_circ_0130385	1.2e-33	20555
hsa_circ_0130980	1.2e-33	56738
hsa_circ_0136260	1.2e-33	6610
hsa_circ_0076871	1.2e-33	64649
hsa_circ_0000627	1.2e-33	21638
hsa_circ_0004659	1.3e-33	1162152
hsa-SLC7A6_0018	1.3e-33	1627
hsa_circ_0120284	1.3e-33	91278
hsa_circ_0094062	1.3e-33	59542
hsa_circ_0094063	1.3e-33	59545
hsa_circ_0000964	1.3e-33	11650
hsa_circ_0112068	1.3e-33	38223
hsa-MAP2K2_0010	1.3e-33	1930
hsa-USMG5_0004	1.3e-33	874
hsa_circ_0004923	1.3e-33	698877
hsa_circ_0134859	1.3e-33	60508
hsa-intergenic_004313	1.3e-33	1205
hsa_circ_0093311	1.3e-33	16760
hsa_circ_0129791	1.3e-33	6392
hsa-AARS_0063	1.3e-33	1826
hsa_circ_0103283	1.3e-33	25811
hsa_circ_0120687	1.3e-33	10180
hsa-intergenic_021829	1.3e-33	1544
hsa_circ_0135390	1.3e-33	52569
hsa_circ_0108240	1.3e-33	5128
hsa_circ_0108241	1.3e-33	5132
hsa_circ_0011507	1.3e-33	76814
hsa_circ_0132696	1.3e-33	6282
hsa_circ_0104481	1.3e-33	22116
hsa-SLC20A1_0011	1.3e-33	819
hsa-ASH1L_0281	1.3e-33	1447
hsa_circ_0136975	1.3e-33	4395
hsa_circ_0100443	1.3e-33	21734
hsa_circ_0102874	1.3e-33	25290
hsa_circ_0084685	1.3e-33	27551
hsa_circ_0094523	1.3e-33	30366
hsa_circ_0138957	1.3e-33	28688
hsa_circ_0021851	1.3e-33	6062
hsa-MECP2_0025	1.3e-33	1804
hsa_circ_0106991	1.3e-33	27250
hsa_circ_0132694	1.3e-33	6388
hsa-intergenic_015121	1.3e-33	390
hsa_circ_0116793	1.3e-33	4341
hsa-ADSL_0048	1.3e-33	620
hsa_circ_0017585	1.4e-33	12197
hsa_circ_0007469	1.4e-33	665607
hsa-UBAP1_0027	1.4e-33	1582
hsa-LINC00884_0004	1.4e-33	1327
hsa_circ_0008770	1.4e-33	667970
hsa_circ_0004753	1.4e-33	5540
hsa-OSBPL1A_0096	1.4e-33	1739
hsa_circ_0007105	1.4e-33	13827
hsa_circ_0044190	1.4e-33	98347
hsa_circ_0079611	1.4e-33	13393
hsa-USP34_0409	1.4e-33	940
hsa_circ_0105830	1.4e-33	5707
hsa-MRPL52_0003	1.4e-33	346
hsa_circ_0110261	1.4e-33	6961
hsa-intergenic_028538	1.4e-33	1369
hsa_circ_0102427	1.4e-33	19769
hsa_circ_0124502	1.4e-33	31302
hsa-CREB3L3_0004	1.4e-33	389
hsa_circ_0129705	1.4e-33	22042
hsa-ANKRD6_0036	1.4e-33	1876
hsa_circ_0117711	1.4e-33	71067
hsa_circ_0044181	1.4e-33	12167
circ_CDK10_0002	1.4e-33	731
hsa-LATS1_0037	1.5e-33	790
hsa-TMX2-CTNND1_0028	1.5e-33	1745
hsa_circ_0129947	1.5e-33	67430
hsa_circ_0006442	1.5e-33	688502
hsa-APOC1_0001	1.5e-33	1490
hsa_circ_0134853	1.5e-33	64783
hsa-GPKOW_0008	1.5e-33	1226
hsa_circ_0097678	1.5e-33	10290
hsa_circ_0024326	1.5e-33	34543
hsa_circ_0047774	1.5e-33	64512
hsa_circ_0133671	1.5e-33	61823
hsa_circ_0084559	1.5e-33	55845
hsa_circ_0087637	1.5e-33	7254
hsa_circ_0018564	1.5e-33	7342
hsa-KCTD2_0010	1.5e-33	1928
hsa_circ_0116669	1.5e-33	21336
hsa_circ_0029409	1.5e-33	21267
hsa_circ_0114417	1.5e-33	31918
hsa_circ_0003086	1.5e-33	484479
hsa_circ_0117737	1.5e-33	44052
hsa_circ_0011488	1.5e-33	83407
hsa_circ_0123105	1.5e-33	42373
hsa_circ_0055291	1.5e-33	18912
hsa-HYAL1_0004	1.5e-33	1271
hsa-ZNF346_0026	1.5e-33	1426
hsa_circ_0111259	1.6e-33	26790
hsa_circ_0120349	1.6e-33	12839
hsa-ITGAL_0053	1.6e-33	1675
hsa_circ_0032525	1.6e-33	26272
hsa-ERBB3_0016	1.6e-33	815
hsa_circ_0124280	1.6e-33	4124
hsa_circ_0118823	1.6e-33	11891
hsa_circ_0056703	1.6e-33	6577
hsa_circ_0116996	1.6e-33	9236
hsa-LDLR_0024	1.6e-33	1910
hsa_circ_0129890	1.6e-33	29151
hsa_circ_0120350	1.6e-33	12961
hsa-FBXW8_0060	1.6e-33	952
hsa_circ_0001125	1.6e-33	16994
circ_GIGYF2_0028	1.6e-33	346
hsa_circ_0038915	1.6e-33	7814
hsa_circ_0059997	1.6e-33	23015
hsa-GNB1_0160	1.6e-33	1039
hsa-UNC13A_0025	1.6e-33	1543
hsa_circ_0001658	1.6e-33	48071
hsa_circ_0135040	1.6e-33	65483
hsa_circ_0123874	1.6e-33	6684
hsa_circ_0004019	1.6e-33	48161
hsa-NPEPPS_0081	1.6e-33	1838
hsa_circ_0059992	1.6e-33	23121
hsa_circ_0138863	1.6e-33	39881
hsa_circ_0121400	1.6e-33	29542
hsa_circ_0017579	1.6e-33	13327
hsa_circ_0004701	1.6e-33	48341
hsa_circ_0117787	1.6e-33	42756
hsa_circ_0138864	1.6e-33	40086
hsa_circ_0039798	1.6e-33	13604
hsa_circ_0007724	1.6e-33	1329425
hsa_circ_0126860	1.6e-33	31583
hsa_circ_0008733	1.6e-33	1724099
hsa_circ_0113031	1.6e-33	4265
hsa-UBE2V2_0024	1.6e-33	232
hsa-GNB1_0069	1.6e-33	1056
hsa_circ_0099525	1.7e-33	61638
hsa_circ_0002978	1.7e-33	1732388
hsa_circ_0002813	1.7e-33	13191
hsa_circ_0087638	1.7e-33	7636
hsa_circ_0004784	1.7e-33	1737174
hsa_circ_0099526	1.7e-33	61863
hsa_circ_0132608	1.7e-33	41032
hsa_circ_0091565	1.7e-33	21090
hsa-RBM6_0075	1.7e-33	533
hsa_circ_0114955	1.7e-33	14195
hsa_circ_0006643	1.7e-33	1743473
hsa-INSR_0142	1.7e-33	1365
hsa_circ_0093918	1.7e-33	6199
hsa_circ_0111228	1.7e-33	37059
hsa-HOOK3_0185	1.7e-33	1757
hsa-RC3H2_0063	1.7e-33	615
hsa_circ_0128876	1.7e-33	44728
hsa-SIK3_0026	1.7e-33	1890
hsa_circ_0033873	1.7e-33	754810
hsa_circ_0033929	1.7e-33	755115
hsa-OPA3_0012	1.7e-33	1612
hsa-PSME4_0183	1.7e-33	1688
hsa_circ_0066708	1.7e-33	206955
hsa-DIP2B_0235	1.7e-33	1760
hsa_circ_0087639	1.7e-33	7780
hsa_circ_0137485	1.7e-33	79686
hsa_circ_0033925	1.7e-33	757704
hsa-CALN1_0037	1.7e-33	1755
hsa_circ_0000962	1.7e-33	37347
hsa_circ_0003382	1.7e-33	1374533
hsa_circ_0119978	1.7e-33	42989
hsa_circ_0033874	1.8e-33	764655
hsa-PBX3_0072	1.8e-33	573
hsa-DOPEY2_0138	1.8e-33	1436
hsa_circ_0033913	1.8e-33	766508
hsa-SIRT4_0002	1.8e-33	1461
hsa-C16orf52_0017	1.8e-33	1096
hsa_circ_0095272	1.8e-33	9211
hsa_circ_0128099	1.8e-33	47286
hsa-SMG1_0225	1.8e-33	1483
hsa-SH3KBP1_0079	1.8e-33	986
hsa_circ_0026480	1.8e-33	22178
hsa_circ_0115830	1.8e-33	26624
hsa_circ_0003301	1.8e-33	20646
hsa_circ_0112557	1.8e-33	43606
hsa_circ_0094088	1.8e-33	79995
hsa-C8orf44-SGK3_0008	1.8e-33	878
hsa_circ_0126485	1.8e-33	37786
hsa_circ_0063581	1.8e-33	3163
hsa-PITPNC1_0053	1.8e-33	1408
hsa_circ_0087640	1.8e-33	8040
hsa_circ_0113058	1.8e-33	4507
hsa_circ_0138332	1.8e-33	12604
hsa_circ_0008444	1.8e-33	10675
hsa-PTGES3_0027	1.8e-33	1498
hsa-RP11-739N20.2_0002	1.8e-33	1790
hsa_circ_0072850	1.8e-33	6709
hsa_circ_0072808	1.9e-33	6710
hsa_circ_0072821	1.9e-33	6711
hsa_circ_0078833	1.9e-33	10916
hsa_circ_0112553	1.9e-33	44158
hsa-BAZ2B_0150	1.9e-33	693
hsa_circ_0115389	1.9e-33	1811
hsa_circ_0131670	1.9e-33	14165
hsa_circ_0132164	1.9e-33	26002
hsa-YARS_0035	1.9e-33	875
hsa-C5orf42_0186	1.9e-33	1400
[truncated: 42,759 more rows]
