# Supplementary material for: Backward translation of circular RNAs
Source: Research Square preprint supplement (doi:10.21203/rs.3.rs-5558507/v1), 2025-01-22
Supplement: Supplementary file 6 [file de1d686f843173a4eaa3a8d2.xlsx]

## Sheet: Sheet1
Number of proteins	Prosite ID	Prosite
564944	PS00005	PKC_PHOSPHO_SITE Protein kinase C phosphorylation site.
372495	PS00006	CK2_PHOSPHO_SITE Casein kinase II phosphorylation site.
261579	PS00008	MYRISTYL N-myristoylation site.
173220	PS00001	ASN_GLYCOSYLATION N-glycosylation site.
148468	PS00004	CAMP_PHOSPHO_SITE cAMP- and cGMP-dependent protein kinase phosphorylation site.
64709	PS00009	AMIDATION Amidation site.
20469	PS00342	MICROBODIES_CTER Microbodies C-terminal targeting signal.
11325	PS00007	TYR_PHOSPHO_SITE_1 Tyrosine kinase phosphorylation site 1.
10756	PS60007	TYR_PHOSPHO_SITE_2 Tyrosine kinase phosphorylation site 2.
9343	PS50079	NLS_BP Bipartite nuclear localization signal profile.
8818	PS00016	RGD Cell attachment sequence.
5133	PS50323	ARG_RICH Arginine-rich region profile.
4748	PS00294	PRENYLATION Prenyl group binding site (CAAX box).
3257	PS50314	PHE_RICH Phenylalanine-rich region profile.
2473	PS50099	PRO_RICH Proline-rich region profile.
2240	PS00029	LEUCINE_ZIPPER Leucine zipper pattern.
1895	PS51257	PROKAR_LIPOPROTEIN Prokaryotic membrane lipoprotein lipid attachment site profile.
1578	PS50311	CYS_RICH Cysteine-rich region profile.
1241	PS50318	LYS_RICH Lysine-rich region profile.
1231	PS00017	ATP_GTP_A ATP/GTP-binding site motif A (P-loop).
1085	PS50325	THR_RICH Threonine-rich region profile.
941	PS50315	GLY_RICH Glycine-rich region profile.
930	PS50326	VAL_RICH Valine-rich region profile.
864	PS50316	HIS_RICH Histidine-rich region profile.
755	PS50324	SER_RICH Serine-rich region profile.
536	PS00228	TUBULIN_B_AUTOREG Tubulin-beta mRNA autoregulation signal.
392	PS50319	LEU_RICH Leucine-rich region profile.
366	PS50328	TYR_RICH Tyrosine-rich region profile.
337	PS50312	ASP_RICH Aspartic acid-rich region profile.
337	PS50313	GLU_RICH Glutamic acid-rich region profile.
320	PS00430	TONB_DEPENDENT_REC_1 TonB-dependent receptor (TBDR) proteins signature 1.
130	PS00284	SERPIN Serpins signature.
129	PS50317	ILE_RICH Isoleucine-rich region profile.
121	PS00014	ER_TARGET Endoplasmic reticulum targeting sequence.
119	PS00290	IG_MHC Immunoglobulins and major histocompatibility complex proteins signature.
114	PS50310	ALA_RICH Alanine-rich region profile.
110	PS00879	ODR_DC_2_2 Orn/DAP/Arg decarboxylases family 2 signature 2.
89	PS50965	NERD NERD domain profile.
79	PS00142	ZINC_PROTEASE Neutral zinc metallopeptidases, zinc-binding region signature.
77	PS50321	ASN_RICH Asparagine-rich region profile.
70	PS00092	N6_MTASE N-6 Adenine-specific DNA methylases signature.
69	PS00028	ZINC_FINGER_C2H2_1 Zinc finger C2H2 type domain signature.
61	PS01186	EGF_2 EGF-like domain signature 2.
61	PS50327	TRP_RICH Tryptophan-rich region profile.
57	PS00146	BETA_LACTAMASE_A Beta-lactamase class-A active site.
46	PS00539	PYROKININ Pyrokinins signature.
45	PS00398	RECOMBINASES_2 Site-specific recombinases signature 2.
43	PS00152	ATPASE_ALPHA_BETA ATP synthase alpha and beta subunits signature.
42	PS50320	MET_RICH Methionine-rich region profile.
41	PS00022	EGF_1 EGF-like domain signature 1.
40	PS00527	RIBOSOMAL_S14 Ribosomal protein S14 signature.
40	PS51410	BH4_AAA_HYDROXYL_2 Biopterin-dependent aromatic amino acid hydroxylase family profile.
39	PS00391	ATPASE_NA_K_BETA_2 Sodium and potassium ATPases beta subunits signature 2.
37	PS00127	RNASE_PANCREATIC Pancreatic ribonuclease family signature.
37	PS00369	PTS_HPR_HIS PTS HPR domain histidine phosphorylation site signature.
35	PS00086	CYTOCHROME_P450 Cytochrome P450 cysteine heme-iron ligand signature.
34	PS00639	THIOL_PROTEASE_HIS Eukaryotic thiol (cysteine) proteases histidine active site.
33	PS00178	AA_TRNA_LIGASE_I Aminoacyl-transfer RNA synthetases class-I signature.
30	PS00237	G_PROTEIN_RECEP_F1_1 G-protein coupled receptors family 1 signature.
30	PS51020	SPONDIN Spondin domain profile.
29	PS00018	EF_HAND_1 EF-hand calcium-binding domain.
27	PS00678	WD_REPEATS_1 Trp-Asp (WD) repeats signature.
25	PS00213	LIPOCALIN Lipocalin signature.
25	PS00307	LECTIN_LEGUME_BETA Legume lectins beta-chain signature.
24	PS00211	ABC_TRANSPORTER_1 ABC transporters family signature.
21	PS00036	BZIP_BASIC Basic-leucine zipper (bZIP) domain signature.
21	PS00120	LIPASE_SER Lipases, serine active site.
21	PS51019	REELIN Reelin domain profile.
20	PS00063	ALDOKETO_REDUCTASE_3 Aldo/keto reductase family putative active site signature.
20	PS00133	CARBOXYPEPT_ZN_2 Zinc carboxypeptidases, zinc-binding region 2 signature.
19	PS00012	PHOSPHOPANTETHEINE Phosphopantetheine attachment site.
19	PS00589	PTS_HPR_SER PTS HPR domain serine phosphorylation site signature.
18	PS00426	CEREAL_TRYP_AMYL_INH Cereal trypsin/alpha-amylase inhibitors family signature.
18	PS00732	RIBOSOMAL_S16 Ribosomal protein S16 signature.
17	PS00659	GLYCOSYL_HYDROL_F5 Glycosyl hydrolases family 5 signature.
17	PS50942	ENTH ENTH domain profile.
16	PS00261	GLYCO_HORMONE_BETA_1 Glycoprotein hormones beta chain signature 1.
16	PS00436	PEROXIDASE_2 Peroxidases active site signature.
16	PS51139	GTF2I GTF2I-like repeat profile.
15	PS00185	IPNS_1 Isopenicillin N synthase signature 1.
15	PS00216	SUGAR_TRANSPORT_1 Sugar transport proteins signature 1.
15	PS51015	YDG YDG domain profile.
14	PS00059	ADH_ZINC Zinc-containing alcohol dehydrogenases signature.
14	PS00093	N4_MTASE N-4 cytosine-specific DNA methylases signature.
14	PS00094	C5_MTASE_1 C-5 cytosine-specific DNA methylases active site.
14	PS00118	PA2_HIS Phospholipase A2 histidine active site.
14	PS00217	SUGAR_TRANSPORT_2 Sugar transport proteins signature 2.
14	PS00867	CPSASE_2 Carbamoyl-phosphate synthase subdomain signature 2.
14	PS00962	RIBOSOMAL_S2_1 Ribosomal protein S2 signature 1.
14	PS50202	MSP Major sperm protein (MSP) domain profile.
14	PS51111	REJ REJ domain profile.
13	PS00687	ALDEHYDE_DEHYDR_GLU Aldehyde dehydrogenases glutamic acid active site.
13	PS01159	WW_DOMAIN_1 WW/rsp5/WWP domain signature.
12	PS00071	GAPDH Glyceraldehyde 3-phosphate dehydrogenase active site.
12	PS00136	SUBTILASE_ASP Serine proteases, subtilase family, aspartic acid active site.
12	PS00318	HMG_COA_REDUCTASE_2 Hydroxymethylglutaryl-coenzyme A reductases signature 2.
12	PS50096	IQ IQ motif profile.
11	PS50322	GLN_RICH Glutamine-rich region profile.
11	PS51398	PAW PAW domain profile.
11	PS51551	EPHRIN_RBD_2 Ephrin receptor-binding (ephrin RBD) domain profile.
10	PS00024	HEMOPEXIN Hemopexin domain signature.
10	PS00055	RIBOSOMAL_S12 Ribosomal protein S12 signature.
10	PS00097	CARBAMOYLTRANSFERASE Aspartate and ornithine carbamoyltransferases signature.
10	PS00445	FGGY_KINASES_2 FGGY family of carbohydrate kinases signature 2.
10	PS00626	RCC1_2 Regulator of chromosome condensation (RCC1) signature 2.
10	PS00697	DNA_LIGASE_A1 ATP-dependent DNA ligase AMP-binding site.
10	PS00699	NITROGENASE_1_1 Nitrogenases component 1 alpha and beta subunits signature 1.
10	PS50835	IG_LIKE Ig-like domain profile.
10	PS51379	4FE4S_FER_2 4Fe-4S ferredoxin-type iron-sulfur binding domain profile.
9	PS00138	SUBTILASE_SER Serine proteases, subtilase family, serine active site.
9	PS00227	TUBULIN Tubulin subunits alpha, beta, and gamma signature.
9	PS00583	PFKB_KINASES_1 pfkB family of carbohydrate kinases signature 1.
9	PS00761	SPASE_I_3 Signal peptidases I signature 3.
9	PS01346	CLAUDIN Claudin family signature.
9	PS51144	ALPHA_CA_2 Alpha-carbonic anhydrases profile.
8	PS00046	HISTONE_H2A Histone H2A signature.
8	PS00061	ADH_SHORT Short-chain dehydrogenases/reductases family signature.
8	PS00161	ISOCITRATE_LYASE Isocitrate lyase signature.
8	PS00221	MIP MIP family signature.
8	PS00265	PANCREATIC_HORMONE_1 Pancreatic hormone family signature.
8	PS00455	AMP_BINDING Putative AMP-binding domain signature.
8	PS00615	C_TYPE_LECTIN_1 C-type lectin domain signature.
8	PS50212	RASGEF_NTER Ras guanine-nucleotide exchange factors N-terminal domain profile.
8	PS51274	GATASE_COBBQ CobBQ-type GATase domain profile.
7	PS00070	ALDEHYDE_DEHYDR_CYS Aldehyde dehydrogenases cysteine active site.
7	PS00072	ACYL_COA_DH_1 Acyl-CoA dehydrogenases signature 1.
7	PS00599	AA_TRANSFER_CLASS_2 Aminotransferases class-II pyridoxal-phosphate attachment site.
7	PS00622	HTH_LUXR_1 LuxR-type HTH domain signature.
7	PS00652	TNFR_NGFR_1 TNFR/NGFR family cysteine-rich region signature.
7	PS01156	TONB_DEPENDENT_REC_2 TonB-dependent receptor (TBDR) proteins signature 2.
7	PS50095	PLAT PLAT domain profile.
7	PS50883	EAL EAL domain profile.
7	PS51004	SEMA Sema domain profile.
7	PS51442	M_PRO Coronavirus main protease (M-pro) domain profile.
6	PS00048	PROTAMINE_P1 Protamine P1 signature.
6	PS00141	ASP_PROTEASE Eukaryotic and viral aspartyl proteases active site.
6	PS00159	ALDOLASE_KDPG_KHG_1 KDPG and KHG aldolases active site.
6	PS00177	TOPOISOMERASE_II DNA topoisomerase II signature.
6	PS00422	GRANINS_1 Granins signature 1.
6	PS00501	SPASE_I_1 Signal peptidases I serine active site.
6	PS01253	FN1_1 Fibronectin type-I domain signature.
6	PS51231	DAD Diaphanous autoregulatory domain (DAD) profile.
5	PS00109	PROTEIN_KINASE_TYR Tyrosine protein kinases specific active-site signature.
5	PS00134	TRYPSIN_HIS Serine proteases, trypsin family, histidine active site.
5	PS00135	TRYPSIN_SER Serine proteases, trypsin family, serine active site.
5	PS00165	DEHYDRATASE_SER_THR Serine/threonine dehydratases pyridoxal-phosphate attachment site.
5	PS00194	THIOREDOXIN_1 Thioredoxin family active site.
5	PS00196	COPPER_BLUE Type-1 copper (blue) proteins signature.
5	PS00197	2FE2S_FER_1 2Fe-2S ferredoxin-type iron-sulfur binding region signature.
5	PS00300	SRP54 SRP54-type proteins GTP-binding domain signature.
5	PS00338	SOMATOTROPIN_2 Somatotropin, prolactin and related hormones signature 2.
5	PS00809	ADP_GLC_PYROPHOSPH_2 ADP-glucose pyrophosphorylase signature 2.
5	PS00831	RIBOSOMAL_L27 Ribosomal protein L27 signature.
5	PS00923	ASP_GLU_RACEMASE_1 Aspartate and glutamate racemases signature 1.
5	PS01070	NUCLEASE_NON_SPEC DNA/RNA non-specific endonucleases active site.
5	PS01295	ISPD 4-diphosphocytidyl-2C-methyl-D-erythritol synthase signature.
5	PS50022	FA58C_3 Coagulation factors 5/8 type C domain (FA58C) profile.
5	PS51059	PARP_CATALYTIC PARP catalytic domain profile.
4	PS00010	ASX_HYDROXYL Aspartic acid and asparagine hydroxylation site.
4	PS00021	KRINGLE_1 Kringle domain signature.
4	PS00047	HISTONE_H4 Histone H4 signature.
4	PS00057	RIBOSOMAL_S18 Ribosomal protein S18 signature.
4	PS00068	MDH Malate dehydrogenase active site signature.
4	PS00107	PROTEIN_KINASE_ATP Protein kinases ATP-binding region signature.
4	PS00115	RNA_POL_II_REPEAT Eukaryotic RNA polymerase II heptapeptide repeat.
4	PS00163	FUMARATE_LYASES Fumarate lyases signature.
4	PS00268	CECROPIN Cecropin family signature.
4	PS00289	PTX_1 Pentraxin domain signature.
4	PS00297	HSP70_1 Heat shock hsp70 proteins family signature 1.
4	PS00332	SOD_CU_ZN_2 Copper/Zinc superoxide dismutase signature 2.
4	PS00435	PEROXIDASE_1 Peroxidases proximal heme-ligand signature.
4	PS00974	MANNITOL_DHGENASE Mannitol dehydrogenases signature.
4	PS01090	TATD_2 TatD deoxyribonuclease family signature 2.
4	PS01121	CASPASE_HIS Caspase family histidine active site.
4	PS01148	UPF0033 Uncharacterized protein family UPF0033 signature.
4	PS50283	NA_SOLUT_SYMP_3 Sodium
4	PS50526	RDRP_SSRNA_NEG_NONSEG RdRp of negative ssRNA viruses with non-segmented genomes catalytic domain profile.
4	PS50911	CHAP CHAP domain profile.
4	PS51062	RUNT Runt domain profile.
4	PS51222	DCD DCD domain profile.
4	PS51277	BURP BURP domain profile.
3	PS00025	P_TREFOIL_1 P-type 'Trefoil' domain signature.
3	PS00052	RIBOSOMAL_S7 Ribosomal protein S7 signature.
3	PS00116	DNA_POLYMERASE_B DNA polymerase family B signature.
3	PS00214	FABP Cytosolic fatty-acid binding proteins signature.
3	PS00242	INTEGRIN_ALPHA Integrins alpha chain signature.
3	PS00449	ATPASE_A ATP synthase a subunit signature.
3	PS00485	A_DEAMINASE Adenosine and AMP deaminase signature.
3	PS00518	ZF_RING_1 Zinc finger RING-type signature.
3	PS00560	CARBOXYPEPT_SER_HIS Serine carboxypeptidases, histidine active site.
3	PS00572	GLYCOSYL_HYDROL_F1_1 Glycosyl hydrolases family 1 active site.
3	PS50057	FERM_3 FERM domain profile.
3	PS50197	BEACH BEACH domain profile.
3	PS50904	PRELI_MSF1 PRELI/MSF1 domain profile.
3	PS51191	FEMABX FemABX peptidyl transferase family profile.
3	PS51370	R R domain profile.
3	PS51539	AV_PCP_ALPHA Arterivirus papain-like cysteine protease alpha (PCPalpha) domain profile.
3	PS51686	SAM_MT_RSMB_NOP SAM-dependent MTase RsmB/NOP-type domain profile.
2	PS00041	HTH_ARAC_FAMILY_1 Bacterial regulatory proteins, araC family signature.
2	PS00095	C5_MTASE_2 C-5 cytosine-specific DNA methylases C-terminal signature.
2	PS00098	THIOLASE_1 Thiolases acyl-enzyme intermediate signature.
2	PS00101	HEXAPEP_TRANSFERASES Hexapeptide-repeat containing-transferases signature.
2	PS00119	PA2_ASP Phospholipase A2 aspartic acid active site.
2	PS00121	COLIPASE_1 Colipase signature.
2	PS00144	ASN_GLN_ASE_1 Asparaginase / glutaminase active site signature 1.
2	PS00189	LIPOYL 2-oxo acid dehydrogenases acyltransferase component lipoyl binding site.
2	PS00195	GLUTAREDOXIN_1 Glutaredoxin active site.
2	PS00210	HEMOCYANIN_2 Arthropod hemocyanins / insect LSPs signature 2.
2	PS00236	NEUROTR_ION_CHANNEL Neurotransmitter-gated ion-channels signature.
2	PS00239	RECEPTOR_TYR_KIN_II Receptor tyrosine kinase class II signature.
2	PS00251	TNF_1 TNF family signature.
2	PS00279	MACPF_1 Membrane attack complex/perforin (MACPF) domain signature.
2	PS00282	KAZAL_1 Kazal serine protease inhibitors family signature.
2	PS00308	LECTIN_LEGUME_ALPHA Legume lectins alpha-chain signature.
2	PS00368	RIBORED_SMALL Ribonucleotide reductase small subunit signature.
2	PS00383	TYR_PHOSPHATASE_1 Tyrosine specific protein phosphatases active site.
2	PS00387	PPASE Inorganic pyrophosphatase signature.
2	PS00389	ATPASE_DELTA ATP synthase delta (OSCP) subunit signature.
2	PS00414	PROFILIN Profilin signature.
2	PS00457	NA_SOLUT_SYMP_2 Sodium
2	PS00502	POLYGALACTURONASE Polygalacturonase active site.
2	PS00546	CYSTEINE_SWITCH Matrixins cysteine switch.
2	PS00549	BACTERIOFERRITIN Bacterioferritin signature.
2	PS00595	AA_TRANSFER_CLASS_5 Aminotransferases class-V pyridoxal-phosphate attachment site.
2	PS00704	PROK_CO2_ANHYDRASE_1 Prokaryotic-type carbonic anhydrases signature 1.
2	PS00850	GLY_RADICAL_1 Glycine radical domain signature.
2	PS00858	PREPHENATE_DEHYDR_2 Prephenate dehydratase signature 2.
2	PS00933	FGGY_KINASES_1 FGGY family of carbohydrate kinases signature 1.
2	PS00967	NMU Neuromedin U signature.
2	PS00983	LY6_UPAR Ly-6 / u-PAR domain signature.
2	PS01143	RIBOSOMAL_L31 Ribosomal protein L31 signature.
2	PS01208	VWFC_1 VWFC domain signature.
2	PS01286	FA58C_2 Coagulation factors 5/8 type C domain (FA58C) signature 2.
2	PS01287	RTC RNA 3'-terminal phosphate cyclase signature.
2	PS50003	PH_DOMAIN PH domain profile.
2	PS50006	FHA_DOMAIN Forkhead-associated (FHA) domain profile.
2	PS50067	KINESIN_MOTOR_2 Kinesin motor domain profile.
2	PS50238	RHOGAP Rho GTPase-activating proteins domain profile.
2	PS50894	HPT Histidine-containing phosphotransfer (HPt) domain profile.
2	PS50918	WWE WWE domain profile.
2	PS51336	DM10 DM10 domain profile.
2	PS51444	FH2 Formin homology-2 (FH2) domain profile.
2	PS51521	HTUSP Herpesvirus tegument ubiquitin-specific protease (htUSP) domain profile.
2	PS51649	NPH3 NPH3 domain profile.
1	PS00027	HOMEOBOX_1 'Homeobox' domain signature.
1	PS00032	ANTENNAPEDIA 'Homeobox' antennapedia-type protein signature.
1	PS00079	MULTICOPPER_OXIDASE1 Multicopper oxidases signature 1.
1	PS00085	CU2_MONOOXYGENASE_2 Copper type II, ascorbate-dependent monooxygenases signature 2.
1	PS00087	SOD_CU_ZN_1 Copper/Zinc superoxide dismutase signature 1.
1	PS00099	THIOLASE_3 Thiolases active site.
1	PS00108	PROTEIN_KINASE_ST Serine/Threonine protein kinases active-site signature.
1	PS00112	PHOSPHAGEN_KINASE Phosphagen kinase active site signature.
1	PS00125	SER_THR_PHOSPHATASE Serine/threonine specific protein phosphatases signature.
1	PS00131	CARBOXYPEPT_SER_SER Serine carboxypeptidases, serine active site.
1	PS00182	GLNA_ADENYLATION Glutamine synthetase class-I adenylation site.
1	PS00191	CYTOCHROME_B5_1 Cytochrome b5 family, heme-binding domain signature.
1	PS00198	4FE4S_FER_1 4Fe-4S ferredoxin-type iron-sulfur binding region signature.
1	PS00226	IF_ROD_1 Intermediate filament (IF) rod domain signature.
1	PS00232	CADHERIN_1 Cadherin domain signature.
1	PS00262	INSULIN Insulin family signature.
1	PS00271	THIONIN Plant thionins signature.
1	PS00277	STAPH_STREP_TOXIN_1 Staphylococcal enterotoxin/Streptococcal pyrogenic exotoxin signature 1.
1	PS00283	SOYBEAN_KUNITZ Soybean trypsin inhibitor (Kunitz) protease inhibitors family signature.
1	PS00296	CHAPERONINS_CPN60 Chaperonins cpn60 signature.
1	PS00327	BACTERIAL_OPSIN_RET Bacterial rhodopsins retinal binding site.
1	PS00335	PARATHYROID Parathyroid hormone family signature.
1	PS00336	BETA_LACTAMASE_C Beta-lactamase class-C active site.
1	PS00345	ETS_DOMAIN_1 Ets-domain signature 1.
1	PS00354	HMGI_Y HMG-I and HMG-Y DNA-binding domain (A+T-hook).
1	PS00358	RIBOSOMAL_L5 Ribosomal protein L5 signature.
1	PS00359	RIBOSOMAL_L11 Ribosomal protein L11 signature.
1	PS00376	ADOMET_SYNTHASE_1 S-adenosylmethionine synthase signature 1.
1	PS00380	RHODANESE_1 Rhodanese signature 1.
1	PS00397	RECOMBINASES_1 Site-specific recombinases active site.
1	PS00482	DIHYDROOROTASE_1 Dihydroorotase signature 1.
1	PS00559	MOLYBDOPTERIN_EUK Eukaryotic molybdopterin oxidoreductases signature.
1	PS00591	GH10_1 Glycosyl hydrolases family 10 (GH10) active site.
1	PS00605	ATPASE_C ATP synthase c subunit signature.
1	PS00606	KS3_1 Ketosynthase family 3 (KS3) active site signature.
1	PS00614	IGPS Indole-3-glycerol phosphate synthase signature.
1	PS00627	GHMP_KINASES_ATP GHMP kinases putative ATP-binding domain.
1	PS00636	DNAJ_1 Nt-dnaJ domain signature.
1	PS00701	RIBOSOMAL_L16_2 Ribosomal protein L16 signature 2.
1	PS00716	SIGMA70_2 Sigma-70 factors family signature 2.
1	PS00750	TCP1_1 Chaperonins TCP-1 signature 1.
1	PS00788	CHORISMATE_SYNTHASE_2 Chorismate synthase signature 2.
1	PS00815	AIPM_HOMOCIT_SYNTH_1 Alpha-isopropylmalate and homocitrate synthases signature 1.
1	PS00838	INTERLEUKIN_4_13 Interleukins -4 and -13 signature.
1	PS00847	MCM_1 MCM family signature.
1	PS00878	ODR_DC_2_1 Orn/DAP/Arg decarboxylases family 2 pyridoxal-P attachment site.
1	PS00888	CNMP_BINDING_1 Cyclic nucleotide-binding domain signature 1.
1	PS00892	HIT_1 HIT domain signature.
1	PS00971	TP2_2 Nuclear transition protein 2 signature 2.
1	PS00995	TCP1_3 Chaperonins TCP-1 signature 3.
1	PS01010	CRISP_2 CRISP family signature 2.
1	PS01015	RIBOSOMAL_L19 Ribosomal protein L19 signature.
1	PS01023	PTR2_2 PTR2 family proton/oligopeptide symporters signature 2.
1	PS01036	HSP70_3 Heat shock hsp70 proteins family signature 3.
1	PS01047	HMA_1 Heavy-metal-associated domain.
1	PS01067	SECE_SEC61G Protein secE/sec61-gamma signature.
1	PS01094	UPF0076 Uncharacterized protein family UPF0076 signature.
1	PS01169	RIBOSOMAL_L21 Ribosomal protein L21 signature.
1	PS01177	ANAPHYLATOXIN_1 Anaphylatoxin domain signature.
1	PS01196	PEPT_TRNA_HYDROL_2 Peptidyl-tRNA hydrolase signature 2.
1	PS01259	BH3 Apoptosis regulator, Bcl-2 family BH3 motif signature.
1	PS01271	NA_SULFATE Sodium
1	PS01307	MOTA Flagellar motor protein motA family signature.
1	PS01319	RBFA Ribosome-binding factor A signature.
1	PS01355	HEMATOPO_REC_S_F1 Short hematopoietin receptor family 1 signature.
1	PS01357	ZF_ZZ_1 Zinc finger ZZ-type signature.
1	PS50157	ZINC_FINGER_C2H2_2 Zinc finger C2H2 type domain profile.
1	PS50175	ASP_PROT_RETROV Aspartyl protease, retroviral-type family profile.
1	PS50254	REL_2 NF-kappa-B/Rel/dorsal domain profile.
1	PS50262	G_PROTEIN_RECEP_F1_2 G-protein coupled receptors family 1 profile.
1	PS50807	GCM GCM domain profile.
1	PS50814	WIF WIF domain profile.
1	PS50826	RUN RUN domain profile.
1	PS50836	DOMON DOMON domain profile.
1	PS50853	FN3 Fibronectin type-III domain profile.
1	PS50882	YTH YTH domain profile.
1	PS50922	TLC TLC domain profile.
1	PS50933	CHRD CHRD domain profile.
1	PS50993	NIDOGEN_G2 Nidogen G2 beta-barrel domain profile.
1	PS50999	COX2_TM Cytochrome oxidase subunit II transmembrane region profile.
1	PS51003	CYTB_CTER Cytochrome b/b6 C-terminal region profile.
1	PS51006	PABS_2 Polyamine biosynthesis (PABS) domain profile.
1	PS51063	HTH_CRP_2 Crp-type HTH domain profile.
1	PS51114	FBA F-box-associated (FBA) domain profile.
1	PS51287	T_AG_OBD Large T-antigen (T-ag) origin-binding domain (OBD) profile.
1	PS51300	NIRD NADH-nitrite reductase subunit D family profile.
1	PS51394	PFU PFU domain profile.
1	PS51408	TRANSFERRIN_LIKE_4 Transferrin-like domain profile.
1	PS51438	ALBUMIN_2 Albumin domain profile.
1	PS51516	SOX_C Sox C-terminal domain profile.
1	PS51535	PESTIVIRUS_NS3PRO Pestivirus NS3 protease (NS3pro) domain profile.
1	PS60014	ALPHA_CONOTOXIN Alpha-conotoxin family signature.
