# Supplementary material for: Backward translation of circular RNAs
Source: Research Square preprint supplement (doi:10.21203/rs.3.rs-5558507/v1), 2025-01-22
Supplement: Supplementary file 7 [file e6b9f802ed5e93b410b7ce20.xlsx]

## Sheet: Conserved BT proteins
Protein ID	Species	CircRNA ID	Gene	Homologene ID	Count
TC-hsa-ACADM_BN_0016.1	Homo sapiens	TC-hsa-ACADM_0016	ACADM	3	2
hsa_circ_BN_0114110.1	Homo sapiens	hsa_circ_0114110	ACADM	3	2
hsa_circ_BN_0114109.1	Homo sapiens	hsa_circ_0114109	ACADM	3	2
hsa_circ_BB_0008129.BSJ.1	Homo sapiens	hsa_circ_0008129	ACADM	3	2
hsa-ACADM_BN_0075.2	Homo sapiens	hsa-ACADM_0075	ACADM	3	2
hsa-ACADM_BN_0068.1	Homo sapiens	hsa-ACADM_0068	ACADM	3	2
hsa-ACADM_BN_0063.2	Homo sapiens	hsa-ACADM_0063	ACADM	3	2
hsa_circ_BN_0114111.2	Homo sapiens	hsa_circ_0114111	ACADM	3	2
hsa-ACADM_BN_0060.1	Homo sapiens	hsa-ACADM_0060	ACADM	3	2
mmu-Acadm_BB_0002.BSJ.1	Mus musculus	mmu-Acadm_0002	Acadm	3	2
mmu-Acadm_BN_0009.1	Mus musculus	mmu-Acadm_0009	Acadm	3	2
mmu-Acadm_BN_0017.1	Mus musculus	mmu-Acadm_0017	Acadm	3	2
hsa_circ_BN_0114114.1	Homo sapiens	hsa_circ_0114114	ACADM	3	2
TC-hsa-ACADM_BN_0028.2	Homo sapiens	TC-hsa-ACADM_0028	ACADM	3	2
TC-hsa-ACADM_BN_0027.1	Homo sapiens	TC-hsa-ACADM_0027	ACADM	3	2
TC-hsa-ACADM_BN_0023.2	Homo sapiens	TC-hsa-ACADM_0023	ACADM	3	2
TC-hsa-ACADM_BN_0019.2	Homo sapiens	TC-hsa-ACADM_0019	ACADM	3	2
ORF_ACADM_0014_BN_001	Homo sapiens	circ_ACADM_0014	ACADM	3	2
ORF_ACADM_0013_BB_001	Homo sapiens	circ_ACADM_0013	ACADM	3	2
ORF_ACADM_0012_BB_001	Homo sapiens	circ_ACADM_0012	ACADM	3	2
hsa_circ_BN_0114115.1	Homo sapiens	hsa_circ_0114115	ACADM	3	2
ORF_ACADM_0009_BB_001	Homo sapiens	circ_ACADM_0009	ACADM	3	2
ORF_ACADM_0008_BB_001	Homo sapiens	circ_ACADM_0008	ACADM	3	2
ORF_ACADM_0004_BB_001	Homo sapiens	circ_ACADM_0004	ACADM	3	2
ORF_ACADM_0002_BB_001	Homo sapiens	circ_ACADM_0002	ACADM	3	2
hsa_circ_BN_0114118.1	Homo sapiens	hsa_circ_0114118	ACADM	3	2
hsa_circ_BN_0114117.1	Homo sapiens	hsa_circ_0114117	ACADM	3	2
hsa_circ_BN_0114116.2	Homo sapiens	hsa_circ_0114116	ACADM	3	2
ORF_ACADM_0010_BB_001	Homo sapiens	circ_ACADM_0010	ACADM	3	2
SRR13142111_BN_10722gene=Acadm.1	Mus musculus	SRR13142111_10722	Acadm	3	2
hsa-ACADM_BB_0017.BSJ.1	Homo sapiens	hsa-ACADM_0017	ACADM	3	2
hsa-ACADM_BN_0031.2	Homo sapiens	hsa-ACADM_0031	ACADM	3	2
hsa-ACADM_BN_0023.1	Homo sapiens	hsa-ACADM_0023	ACADM	3	2
hsa-ACADM_BN_0015.1	Homo sapiens	hsa-ACADM_0015	ACADM	3	2
hsa-ACADM_BN_0011.1	Homo sapiens	hsa-ACADM_0011	ACADM	3	2
hsa-ACADM_BN_0006.2	Homo sapiens	hsa-ACADM_0006	ACADM	3	2
hsa-ACADM_BN_0003.1	Homo sapiens	hsa-ACADM_0003	ACADM	3	2
hsa-ACADM_BN_0002.2	Homo sapiens	hsa-ACADM_0002	ACADM	3	2
hsa-ACADM_BN_0042.1	Homo sapiens	hsa-ACADM_0042	ACADM	3	2
hsa-ACADVL_BB_0053.BSJ.1	Homo sapiens	hsa-ACADVL_0053	ACADVL	5	2
mmu-Acadvl_BB_0009.BSJ.1	Mus musculus	mmu-Acadvl_0009	Acadvl	5	2
hsa-ACAT1_BN_0005.1	Homo sapiens	hsa-ACAT1_0005	ACAT1	6	2
hsa-ACAT1_BN_0011.1	Homo sapiens	hsa-ACAT1_0011	ACAT1	6	2
hsa-ACAT1_BN_0015.1	Homo sapiens	hsa-ACAT1_0015	ACAT1	6	2
hsa-ACAT1_BN_0015.2	Homo sapiens	hsa-ACAT1_0015	ACAT1	6	2
hsa-ACAT1_BN_0016.1	Homo sapiens	hsa-ACAT1_0016	ACAT1	6	2
hsa-ACAT1_BN_0016.2	Homo sapiens	hsa-ACAT1_0016	ACAT1	6	2
hsa-ACAT1_BN_0051.2	Homo sapiens	hsa-ACAT1_0051	ACAT1	6	2
hsa-ACAT1_BN_0029.2	Homo sapiens	hsa-ACAT1_0029	ACAT1	6	2
hsa-ACAT1_BN_0029.3	Homo sapiens	hsa-ACAT1_0029	ACAT1	6	2
hsa-ACAT1_BN_0030.1	Homo sapiens	hsa-ACAT1_0030	ACAT1	6	2
hsa-ACAT1_BN_0042.1	Homo sapiens	hsa-ACAT1_0042	ACAT1	6	2
hsa-ACAT1_BN_0023.1	Homo sapiens	hsa-ACAT1_0023	ACAT1	6	2
hsa-ACAT1_BN_0074.1	Homo sapiens	hsa-ACAT1_0074	ACAT1	6	2
hsa-ACAT1_BN_0074.2	Homo sapiens	hsa-ACAT1_0074	ACAT1	6	2
hsa_circ_BN_0094852.1	Homo sapiens	hsa_circ_0094852	ACAT1	6	2
hsa_circ_BN_0094852.2	Homo sapiens	hsa_circ_0094852	ACAT1	6	2
hsa-ACAT1_BN_0004.1	Homo sapiens	hsa-ACAT1_0004	ACAT1	6	2
hsa_circ_BN_0094853.6	Homo sapiens	hsa_circ_0094853	ACAT1	6	2
hsa_circ_BN_0094853.7	Homo sapiens	hsa_circ_0094853	ACAT1	6	2
hsa_circ_BN_0094854.1	Homo sapiens	hsa_circ_0094854	ACAT1	6	2
hsa_circ_BN_0094855.1	Homo sapiens	hsa_circ_0094855	ACAT1	6	2
hsa_circ_BN_0094856.1	Homo sapiens	hsa_circ_0094856	ACAT1	6	2
hsa_circ_BN_0094856.2	Homo sapiens	hsa_circ_0094856	ACAT1	6	2
hsa_circ_BN_0094857.1	Homo sapiens	hsa_circ_0094857	ACAT1	6	2
hsa_circ_BN_0094857.2	Homo sapiens	hsa_circ_0094857	ACAT1	6	2
mmu-Acat1_BN_0034.3	Mus musculus	mmu-Acat1_0034	Acat1	6	2
hsa-ACAT1_BN_0051.3	Homo sapiens	hsa-ACAT1_0051	ACAT1	6	2
mmu-Acat1_BB_0007.BSJ.1	Mus musculus	mmu-Acat1_0007	Acat1	6	2
mmu-Acat1_BB_0008.BSJ.1	Mus musculus	mmu-Acat1_0008	Acat1	6	2
mmu-Acat1_BB_0009.BSJ.1	Mus musculus	mmu-Acat1_0009	Acat1	6	2
mmu-Acat1_BB_0010.BSJ.1	Mus musculus	mmu-Acat1_0010	Acat1	6	2
mmu-Acat1_BB_0011.BSJ.1	Mus musculus	mmu-Acat1_0011	Acat1	6	2
mmu-Acat1_BB_0018.BSJ.1	Mus musculus	mmu-Acat1_0018	Acat1	6	2
mmu-Acat1_BB_0021.BSJ.1	Mus musculus	mmu-Acat1_0021	Acat1	6	2
mmu-Acat1_BB_0003.BSJ.1	Mus musculus	mmu-Acat1_0003	Acat1	6	2
hsa-ACAT1_BB_0062.BSJ.1	Homo sapiens	hsa-ACAT1_0062	ACAT1	6	2
hsa-ACAT1_BB_0023.BSJ.1	Homo sapiens	hsa-ACAT1_0023	ACAT1	6	2
hsa-ACAT1_BB_0015.BSJ.1	Homo sapiens	hsa-ACAT1_0015	ACAT1	6	2
mmu-Acat1_BN_0019.4	Mus musculus	mmu-Acat1_0019	Acat1	6	2
mmu-Acat1_BN_0008.2	Mus musculus	mmu-Acat1_0008	Acat1	6	2
hsa_circ_BN_0094858.1	Homo sapiens	hsa_circ_0094858	ACAT1	6	2
TC-hsa-ACAT1_BB_0030.BSJ.1	Homo sapiens	TC-hsa-ACAT1_0030	ACAT1	6	2
TC-hsa-ACAT1_BN_0013.1	Homo sapiens	TC-hsa-ACAT1_0013	ACAT1	6	2
TC-hsa-ACAT1_BN_0014.1	Homo sapiens	TC-hsa-ACAT1_0014	ACAT1	6	2
TC-hsa-ACAT1_BN_0014.2	Homo sapiens	TC-hsa-ACAT1_0014	ACAT1	6	2
TC-hsa-ACAT1_BN_0016.1	Homo sapiens	TC-hsa-ACAT1_0016	ACAT1	6	2
TC-hsa-ACAT1_BN_0016.2	Homo sapiens	TC-hsa-ACAT1_0016	ACAT1	6	2
TC-hsa-ACAT1_BN_0021.1	Homo sapiens	TC-hsa-ACAT1_0021	ACAT1	6	2
TC-hsa-ACAT1_BN_0030.1	Homo sapiens	TC-hsa-ACAT1_0030	ACAT1	6	2
SRR11425581_BN_52961gene=Acat1.1	Mus musculus	SRR11425581_52961	Acat1	6	2
hsa_circ_BN_0094858.2	Homo sapiens	hsa_circ_0094858	ACAT1	6	2
TC-hsa-ACAT1_BB_0021.BSJ.1	Homo sapiens	TC-hsa-ACAT1_0021	ACAT1	6	2
TC-hsa-ACAT1_BB_0020.BSJ.1	Homo sapiens	TC-hsa-ACAT1_0020	ACAT1	6	2
hsa_circ_BN_0094859.6	Homo sapiens	hsa_circ_0094859	ACAT1	6	2
hsa_circ_BN_0094859.7	Homo sapiens	hsa_circ_0094859	ACAT1	6	2
ORF_ACAT1_0002_BN_003	Homo sapiens	circ_ACAT1_0002	ACAT1	6	2
ORF_ACAT1_0002_BN_002	Homo sapiens	circ_ACAT1_0002	ACAT1	6	2
ORF_ACAT1_0001_BN_002	Homo sapiens	circ_ACAT1_0001	ACAT1	6	2
ORF_ACAT1_0001_BN_003	Homo sapiens	circ_ACAT1_0001	ACAT1	6	2
mmu-Arg1_BB_0008.BSJ.1	Mus musculus	mmu-Arg1_0008	Arg1	29	2
ORF_ARG1_0001_BB_001	Homo sapiens	circ_ARG1_0001	ARG1	29	2
ORF_ARG1_0002_BB_001	Homo sapiens	circ_ARG1_0002	ARG1	29	2
ORF_ARG1_0005_BB_001	Homo sapiens	circ_ARG1_0005	ARG1	29	2
mmu-Arg1_BB_0002.BSJ.1	Mus musculus	mmu-Arg1_0002	Arg1	29	2
hsa_circ_BB_0140634.BSJ.1	Homo sapiens	hsa_circ_0140634	ATP7A	35	2
mmu_circ_BN_0016074.2	Mus musculus	mmu_circ_0016074	Atp7a	35	2
hsa-ATP7A_BN_0063.2	Homo sapiens	hsa-ATP7A_0063	ATP7A	35	2
hsa-ATP7A_BN_0063.5	Homo sapiens	hsa-ATP7A_0063	ATP7A	35	2
hsa-ATP7A_BN_0065.1	Homo sapiens	hsa-ATP7A_0065	ATP7A	35	2
hsa-ATP7A_BB_0047.BSJ.1	Homo sapiens	hsa-ATP7A_0047	ATP7A	35	2
hsa_circ_BN_0091138.16	Homo sapiens	hsa_circ_0091138	ATP7A	35	2
hsa_circ_BN_0091138.20	Homo sapiens	hsa_circ_0091138	ATP7A	35	2
hsa-ATP7A_BB_0044.BSJ.1	Homo sapiens	hsa-ATP7A_0044	ATP7A	35	2
hsa_circ_BB_0140633.BSJ.1	Homo sapiens	hsa_circ_0140633	ATP7A	35	2
hsa-ATP7A_BN_0063.1	Homo sapiens	hsa-ATP7A_0063	ATP7A	35	2
hsa-ATP7A_BN_0095.1	Homo sapiens	hsa-ATP7A_0095	ATP7A	35	2
hsa-ATP7A_BN_0065.2	Homo sapiens	hsa-ATP7A_0065	ATP7A	35	2
hsa-ATP7A_BB_0034.BSJ.1	Homo sapiens	hsa-ATP7A_0034	ATP7A	35	2
hsa-ATP7A_BN_0065.5	Homo sapiens	hsa-ATP7A_0065	ATP7A	35	2
hsa-ATP7A_BN_0098.1	Homo sapiens	hsa-ATP7A_0098	ATP7A	35	2
hsa_circ_BB_0140632.BSJ.1	Homo sapiens	hsa_circ_0140632	ATP7A	35	2
hsa-ATP7A_BB_0006.BSJ.1	Homo sapiens	hsa-ATP7A_0006	ATP7A	35	2
hsa_circ_BN_0091138.17	Homo sapiens	hsa_circ_0091138	ATP7A	35	2
hsa-ATP7A_BB_0031.BSJ.1	Homo sapiens	hsa-ATP7A_0031	ATP7A	35	2
hsa-ATP7A_BN_0067.1	Homo sapiens	hsa-ATP7A_0067	ATP7A	35	2
hsa-ATP7A_BN_0067.2	Homo sapiens	hsa-ATP7A_0067	ATP7A	35	2
hsa-ATP7A_BN_0067.5	Homo sapiens	hsa-ATP7A_0067	ATP7A	35	2
hsa-ATP7A_BB_0088.BSJ.1	Homo sapiens	hsa-ATP7A_0088	ATP7A	35	2
hsa-ATP7A_BN_0072.3	Homo sapiens	hsa-ATP7A_0072	ATP7A	35	2
hsa-ATP7A_BN_0033.1	Homo sapiens	hsa-ATP7A_0033	ATP7A	35	2
hsa-ATP7A_BB_0061.BSJ.1	Homo sapiens	hsa-ATP7A_0061	ATP7A	35	2
hsa_circ_BN_0091131.2	Homo sapiens	hsa_circ_0091131	ATP7A	35	2
hsa-ATP7A_BN_0072.4	Homo sapiens	hsa-ATP7A_0072	ATP7A	35	2
hsa-ATP7A_BN_0026.1	Homo sapiens	hsa-ATP7A_0026	ATP7A	35	2
hsa-ATP7A_BN_0024.2	Homo sapiens	hsa-ATP7A_0024	ATP7A	35	2
hsa-ATP7A_BN_0033.2	Homo sapiens	hsa-ATP7A_0033	ATP7A	35	2
mmu-Atp7a_BN_0005.3	Mus musculus	mmu-Atp7a_0005	Atp7a	35	2
mmu-Atp7a_BN_0005.4	Mus musculus	mmu-Atp7a_0005	Atp7a	35	2
mmu-Atp7a_BN_0006.1	Mus musculus	mmu-Atp7a_0006	Atp7a	35	2
hsa-ATP7A_BN_0046.1	Homo sapiens	hsa-ATP7A_0046	ATP7A	35	2
hsa-ATP7A_BN_0024.1	Homo sapiens	hsa-ATP7A_0024	ATP7A	35	2
hsa-ATP7A_BN_0014.5	Homo sapiens	hsa-ATP7A_0014	ATP7A	35	2
hsa-ATP7A_BN_0014.2	Homo sapiens	hsa-ATP7A_0014	ATP7A	35	2
hsa-ATP7A_BN_0014.1	Homo sapiens	hsa-ATP7A_0014	ATP7A	35	2
mmu_circ_BN_0016074.1	Mus musculus	mmu_circ_0016074	Atp7a	35	2
mmu-Atp7a_BN_0026.1	Mus musculus	mmu-Atp7a_0026	Atp7a	35	2
hsa_circ_BN_0091131.1	Homo sapiens	hsa_circ_0091131	ATP7A	35	2
mmu-Atp7a_BN_0001.5	Mus musculus	mmu-Atp7a_0001	Atp7a	35	2
hsa_circ_BN_0091131.5	Homo sapiens	hsa_circ_0091131	ATP7A	35	2
hsa_circ_BN_0091136.1	Homo sapiens	hsa_circ_0091136	ATP7A	35	2
hsa_circ_BN_0091137.1	Homo sapiens	hsa_circ_0091137	ATP7A	35	2
hsa_circ_BN_0091143.16	Homo sapiens	hsa_circ_0091143	ATP7A	35	2
hsa_circ_BN_0140629.2	Homo sapiens	hsa_circ_0140629	ATP7A	35	2
hsa_circ_BN_0140628.1	Homo sapiens	hsa_circ_0140628	ATP7A	35	2
hsa_circ_BN_0140627.1	Homo sapiens	hsa_circ_0140627	ATP7A	35	2
hsa_circ_BN_0091143.17	Homo sapiens	hsa_circ_0091143	ATP7A	35	2
hsa_circ_BN_0091142.17	Homo sapiens	hsa_circ_0091142	ATP7A	35	2
hsa_circ_BN_0091142.16	Homo sapiens	hsa_circ_0091142	ATP7A	35	2
hsa_circ_BN_0091121.16	Homo sapiens	hsa_circ_0091121	ATP7A	35	2
hsa_circ_BN_0091121.17	Homo sapiens	hsa_circ_0091121	ATP7A	35	2
hsa_circ_BN_0091121.20	Homo sapiens	hsa_circ_0091121	ATP7A	35	2
hsa_circ_BN_0091125.1	Homo sapiens	hsa_circ_0091125	ATP7A	35	2
hsa_circ_BN_0140630.2	Homo sapiens	hsa_circ_0140630	ATP7A	35	2
hsa_circ_BN_0091139.17	Homo sapiens	hsa_circ_0091139	ATP7A	35	2
hsa_circ_BN_0091139.16	Homo sapiens	hsa_circ_0091139	ATP7A	35	2
hsa_circ_BN_0140632.1	Homo sapiens	hsa_circ_0140632	ATP7A	35	2
hsa_circ_BN_0091134.1	Homo sapiens	hsa_circ_0091134	ATP7A	35	2
TC-hsa-ATP7A_BN_0027.1	Homo sapiens	TC-hsa-ATP7A_0027	ATP7A	35	2
TC-hsa-ATP7A_BN_0027.2	Homo sapiens	TC-hsa-ATP7A_0027	ATP7A	35	2
TC-hsa-ATP7A_BN_0029.1	Homo sapiens	TC-hsa-ATP7A_0029	ATP7A	35	2
TC-hsa-ATP7A_BN_0030.1	Homo sapiens	TC-hsa-ATP7A_0030	ATP7A	35	2
TC-hsa-ATP7A_BN_0030.2	Homo sapiens	TC-hsa-ATP7A_0030	ATP7A	35	2
TC-hsa-ATP7A_BN_0036.1	Homo sapiens	TC-hsa-ATP7A_0036	ATP7A	35	2
TC-hsa-ATP7A_BN_0036.2	Homo sapiens	TC-hsa-ATP7A_0036	ATP7A	35	2
TC-hsa-ATP7A_BN_0044.1	Homo sapiens	TC-hsa-ATP7A_0044	ATP7A	35	2
TC-hsa-ATP7A_BN_0044.2	Homo sapiens	TC-hsa-ATP7A_0044	ATP7A	35	2
TC-hsa-ATP7A_BN_0029.2	Homo sapiens	TC-hsa-ATP7A_0029	ATP7A	35	2
mmu-Atp7a_BN_0001.2	Mus musculus	mmu-Atp7a_0001	Atp7a	35	2
mmu-Atp7a_BN_0001.1	Mus musculus	mmu-Atp7a_0001	Atp7a	35	2
hsa_circ_BN_0091130.1	Homo sapiens	hsa_circ_0091130	ATP7A	35	2
hsa_circ_BN_0091128.20	Homo sapiens	hsa_circ_0091128	ATP7A	35	2
hsa_circ_BN_0091128.17	Homo sapiens	hsa_circ_0091128	ATP7A	35	2
hsa_circ_BN_0091128.16	Homo sapiens	hsa_circ_0091128	ATP7A	35	2
TC-hsa-ATP7A_BN_0045.2	Homo sapiens	TC-hsa-ATP7A_0045	ATP7A	35	2
TC-hsa-ATP7A_BN_0045.3	Homo sapiens	TC-hsa-ATP7A_0045	ATP7A	35	2
TC-hsa-ATP7A_BN_0051.1	Homo sapiens	TC-hsa-ATP7A_0051	ATP7A	35	2
TC-hsa-ATP7A_BB_0062.BSJ.1	Homo sapiens	TC-hsa-ATP7A_0062	ATP7A	35	2
hsa_circ_BN_0091127.1	Homo sapiens	hsa_circ_0091127	ATP7A	35	2
hsa_circ_BN_0091126.6	Homo sapiens	hsa_circ_0091126	ATP7A	35	2
hsa_circ_BN_0091126.3	Homo sapiens	hsa_circ_0091126	ATP7A	35	2
hsa_circ_BN_0091126.2	Homo sapiens	hsa_circ_0091126	ATP7A	35	2
hsa_circ_BN_0091132.1	Homo sapiens	hsa_circ_0091132	ATP7A	35	2
hsa_circ_BN_0140633.1	Homo sapiens	hsa_circ_0140633	ATP7A	35	2
hsa_circ_BN_0091132.2	Homo sapiens	hsa_circ_0091132	ATP7A	35	2
hsa_circ_BN_0091132.5	Homo sapiens	hsa_circ_0091132	ATP7A	35	2
hsa_circ_BN_0091133.1	Homo sapiens	hsa_circ_0091133	ATP7A	35	2
hsa_circ_BN_0140632.2	Homo sapiens	hsa_circ_0140632	ATP7A	35	2
hsa_circ_BN_0091120.1	Homo sapiens	hsa_circ_0091120	ATP7A	35	2
TC-hsa-ATP7A_BN_0051.2	Homo sapiens	TC-hsa-ATP7A_0051	ATP7A	35	2
TC-hsa-ATP7A_BN_0055.1	Homo sapiens	TC-hsa-ATP7A_0055	ATP7A	35	2
TC-hsa-ATP7A_BN_0055.2	Homo sapiens	TC-hsa-ATP7A_0055	ATP7A	35	2
TC-hsa-ATP7A_BN_0058.1	Homo sapiens	TC-hsa-ATP7A_0058	ATP7A	35	2
TC-hsa-ATP7A_BN_0058.2	Homo sapiens	TC-hsa-ATP7A_0058	ATP7A	35	2
TC-hsa-ATP7A_BN_0062.1	Homo sapiens	TC-hsa-ATP7A_0062	ATP7A	35	2
hsa_circ_BN_0091118.1	Homo sapiens	hsa_circ_0091118	ATP7A	35	2
hsa_circ_BN_0091119.1	Homo sapiens	hsa_circ_0091119	ATP7A	35	2
hsa-ATP7A_BN_0074.1	Homo sapiens	hsa-ATP7A_0074	ATP7A	35	2
hsa_circ_BN_0077162.1	Homo sapiens	hsa_circ_0077162	BCKDHB	39	2
hsa-BCKDHB_BN_0012.1	Homo sapiens	hsa-BCKDHB_0012	BCKDHB	39	2
TC-hsa-BCKDHB_BN_0006.1	Homo sapiens	TC-hsa-BCKDHB_0006	BCKDHB	39	2
mmu-Bckdhb_BB_0017.BSJ.1	Mus musculus	mmu-Bckdhb_0017	Bckdhb	39	2
mmu-Bckdhb_BB_0017.BSJ.2	Mus musculus	mmu-Bckdhb_0017	Bckdhb	39	2
mmu-Bckdhb_BB_0039.BSJ.1	Mus musculus	mmu-Bckdhb_0039	Bckdhb	39	2
mmu-Bckdhb_BN_0003.1	Mus musculus	mmu-Bckdhb_0003	Bckdhb	39	2
hsa-BCKDHB_BN_0054.1	Homo sapiens	hsa-BCKDHB_0054	BCKDHB	39	2
hsa-BCKDHB_BN_0064.1	Homo sapiens	hsa-BCKDHB_0064	BCKDHB	39	2
TC-hsa-BCKDHB_BN_0028.1	Homo sapiens	TC-hsa-BCKDHB_0028	BCKDHB	39	2
TC-hsa-BCKDHB_BN_0026.1	Homo sapiens	TC-hsa-BCKDHB_0026	BCKDHB	39	2
ORF_BCKDHB_0002_BB_001	Homo sapiens	circ_BCKDHB_0002	BCKDHB	39	2
hsa_circ_BN_0077167.2	Homo sapiens	hsa_circ_0077167	BCKDHB	39	2
hsa_circ_BN_0077166.1	Homo sapiens	hsa_circ_0077166	BCKDHB	39	2
hsa_circ_BN_0077165.1	Homo sapiens	hsa_circ_0077165	BCKDHB	39	2
mmu-Bckdhb_BN_0008.1	Mus musculus	mmu-Bckdhb_0008	Bckdhb	39	2
hsa_circ_BN_0077164.1	Homo sapiens	hsa_circ_0077164	BCKDHB	39	2
TC-hsa-BCKDHB_BN_0024.1	Homo sapiens	TC-hsa-BCKDHB_0024	BCKDHB	39	2
hsa_circ_BN_0077160.1	Homo sapiens	hsa_circ_0077160	BCKDHB	39	2
hsa_circ_BB_0077171.BSJ.1	Homo sapiens	hsa_circ_0077171	BCKDHB	39	2
hsa_circ_BB_0077170.BSJ.1	Homo sapiens	hsa_circ_0077170	BCKDHB	39	2
hsa-BCKDHB_BN_0083.1	Homo sapiens	hsa-BCKDHB_0083	BCKDHB	39	2
hsa_circ_BN_0077163.1	Homo sapiens	hsa_circ_0077163	BCKDHB	39	2
TC-hsa-BCKDHB_BB_0002.BSJ.2	Homo sapiens	TC-hsa-BCKDHB_0002	BCKDHB	39	2
TC-hsa-BCKDHB_BB_0028.BSJ.2	Homo sapiens	TC-hsa-BCKDHB_0028	BCKDHB	39	2
TC-hsa-BCKDHB_BN_0002.1	Homo sapiens	TC-hsa-BCKDHB_0002	BCKDHB	39	2
SRR11425580_BN_90866gene=Bckdhb.2	Mus musculus	SRR11425580_90866	Bckdhb	39	2
mmu_circ_BN_0015952.1	Mus musculus	mmu_circ_0015952	Bckdhb	39	2
mmu-Bckdhb_BN_0041.1	Mus musculus	mmu-Bckdhb_0041	Bckdhb	39	2
mmu-Bckdhb_BN_0037.1	Mus musculus	mmu-Bckdhb_0037	Bckdhb	39	2
mmu-Bckdhb_BN_0016.1	Mus musculus	mmu-Bckdhb_0016	Bckdhb	39	2
mmu-Bckdhb_BN_0018.1	Mus musculus	mmu-Bckdhb_0018	Bckdhb	39	2
mmu-Lyst_BN_0058.3	Mus musculus	mmu-Lyst_0058	Lyst	61	2
mmu-Lyst_BN_0053.4	Mus musculus	mmu-Lyst_0053	Lyst	61	2
TC-hsa-LYST_BN_0125.4	Homo sapiens	TC-hsa-LYST_0125	LYST	61	2
mmu-Lyst_BN_0045.3	Mus musculus	mmu-Lyst_0045	Lyst	61	2
TC-hsa-LYST_BN_0125.12	Homo sapiens	TC-hsa-LYST_0125	LYST	61	2
TC-hsa-LYST_BB_0100.BSJ.1	Homo sapiens	TC-hsa-LYST_0100	LYST	61	2
TC-hsa-LYST_BN_0019.16	Homo sapiens	TC-hsa-LYST_0019	LYST	61	2
TC-hsa-LYST_BN_0019.20	Homo sapiens	TC-hsa-LYST_0019	LYST	61	2
TC-hsa-LYST_BN_0059.10	Homo sapiens	TC-hsa-LYST_0059	LYST	61	2
TC-hsa-LYST_BN_0060.10	Homo sapiens	TC-hsa-LYST_0060	LYST	61	2
TC-hsa-LYST_BN_0060.14	Homo sapiens	TC-hsa-LYST_0060	LYST	61	2
TC-hsa-LYST_BN_0060.18	Homo sapiens	TC-hsa-LYST_0060	LYST	61	2
TC-hsa-LYST_BN_0074.10	Homo sapiens	TC-hsa-LYST_0074	LYST	61	2
TC-hsa-LYST_BN_0124.12	Homo sapiens	TC-hsa-LYST_0124	LYST	61	2
TC-hsa-LYST_BN_0124.4	Homo sapiens	TC-hsa-LYST_0124	LYST	61	2
TC-hsa-LYST_BN_0124.8	Homo sapiens	TC-hsa-LYST_0124	LYST	61	2
TC-hsa-LYST_BN_0127.6	Homo sapiens	TC-hsa-LYST_0127	LYST	61	2
TC-hsa-LYST_BN_0127.2	Homo sapiens	TC-hsa-LYST_0127	LYST	61	2
TC-hsa-LYST_BN_0127.10	Homo sapiens	TC-hsa-LYST_0127	LYST	61	2
TC-hsa-LYST_BN_0125.8	Homo sapiens	TC-hsa-LYST_0125	LYST	61	2
hsa_circ_BN_0017093.2	Homo sapiens	hsa_circ_0017093	LYST	61	2
hsa_circ_BN_0112546.12	Homo sapiens	hsa_circ_0112546	LYST	61	2
hsa_circ_BN_0112546.4	Homo sapiens	hsa_circ_0112546	LYST	61	2
hsa_circ_BN_0112546.8	Homo sapiens	hsa_circ_0112546	LYST	61	2
TC-hsa-LYST_BN_0019.24	Homo sapiens	TC-hsa-LYST_0019	LYST	61	2
mmu_circ_BN_0004483.1	Mus musculus	mmu_circ_0004483	Lyst	61	2
hsa_circ_BN_0017085.9	Homo sapiens	hsa_circ_0017085	LYST	61	2
mmu_circ_BN_0004483.4	Mus musculus	mmu_circ_0004483	Lyst	61	2
mmu_circ_BN_0004483.10	Mus musculus	mmu_circ_0004483	Lyst	61	2
mmu_circ_BN_0004483.9	Mus musculus	mmu_circ_0004483	Lyst	61	2
hsa-COL1A2_BB_0008.BSJ.1	Homo sapiens	hsa-COL1A2_0008	COL1A2	69	2
hsa_circ_BB_0081118.BSJ.1	Homo sapiens	hsa_circ_0081118	COL1A2	69	2
mmu-Col1a2_BN_0038.1	Mus musculus	mmu-Col1a2_0038	Col1a2	69	2
mmu-Col1a2_BN_0038.2	Mus musculus	mmu-Col1a2_0038	Col1a2	69	2
hsa_circ_BB_0081060.BSJ.1	Homo sapiens	hsa_circ_0081060	COL1A2	69	2
mmu-Col1a2_BB_0029.BSJ.1	Mus musculus	mmu-Col1a2_0029	Col1a2	69	2
TC-hsa-COL1A2_BB_0035.BSJ.1	Homo sapiens	TC-hsa-COL1A2_0035	COL1A2	69	2
TC-hsa-COL1A2_BB_0003.BSJ.1	Homo sapiens	TC-hsa-COL1A2_0003	COL1A2	69	2
TC-hsa-CPT2_BB_0002.BSJ.1	Homo sapiens	TC-hsa-CPT2_0002	CPT2	77	2
hsa-CPT2_BN_0008.3	Homo sapiens	hsa-CPT2_0008	CPT2	77	2
hsa-CPT2_BB_0007.BSJ.1	Homo sapiens	hsa-CPT2_0007	CPT2	77	2
mmu-Cpt2_BB_0002.BSJ.1	Mus musculus	mmu-Cpt2_0002	Cpt2	77	2
hsa-CST3_BB_0021.BSJ.1	Homo sapiens	hsa-CST3_0021	CST3	78	2
mmu-Cst3_BN_0007.1	Mus musculus	mmu-Cst3_0007	Cst3	78	2
SRR13142123_BN_39103gene=Ddb2.1	Mus musculus	SRR13142123_39103	Ddb2	83	2
hsa_circ_BN_0021954.1	Homo sapiens	hsa_circ_0021954	DDB2	83	2
hsa-DDB2_BN_0008.1	Homo sapiens	hsa-DDB2_0008	DDB2	83	2
hsa-DDB2_BN_0009.1	Homo sapiens	hsa-DDB2_0009	DDB2	83	2
TC-hsa-DDB2_BN_0001.1	Homo sapiens	TC-hsa-DDB2_0001	DDB2	83	2
TC-hsa-DDB2_BN_0004.1	Homo sapiens	TC-hsa-DDB2_0004	DDB2	83	2
TC-hsa-DDB2_BN_0006.1	Homo sapiens	TC-hsa-DDB2_0006	DDB2	83	2
TC-hsa-DDB2_BN_0008.1	Homo sapiens	TC-hsa-DDB2_0008	DDB2	83	2
hsa_circ_BN_0021955.1	Homo sapiens	hsa_circ_0021955	DDB2	83	2
hsa_circ_BN_0021953.2	Homo sapiens	hsa_circ_0021953	DDB2	83	2
hsa_circ_BN_0021952.1	Homo sapiens	hsa_circ_0021952	DDB2	83	2
hsa_circ_BN_0021951.2	Homo sapiens	hsa_circ_0021951	DDB2	83	2
hsa_circ_BN_0021950.1	Homo sapiens	hsa_circ_0021950	DDB2	83	2
TC-hsa-DLD_BN_0014.2	Homo sapiens	TC-hsa-DLD_0014	DLD	84	2
hsa-DLD_BN_0003.1	Homo sapiens	hsa-DLD_0003	DLD	84	2
hsa-DLD_BN_0027.1	Homo sapiens	hsa-DLD_0027	DLD	84	2
hsa-DLD_BN_0010.3	Homo sapiens	hsa-DLD_0010	DLD	84	2
hsa-DLD_BN_0011.1	Homo sapiens	hsa-DLD_0011	DLD	84	2
hsa_circ_BN_0132988.1	Homo sapiens	hsa_circ_0132988	DLD	84	2
hsa_circ_BN_0132987.2	Homo sapiens	hsa_circ_0132987	DLD	84	2
hsa_circ_BN_0132987.1	Homo sapiens	hsa_circ_0132987	DLD	84	2
hsa_circ_BN_0081906.2	Homo sapiens	hsa_circ_0081906	DLD	84	2
hsa-DLD_BN_0008.1	Homo sapiens	hsa-DLD_0008	DLD	84	2
hsa-DLD_BN_0004.1	Homo sapiens	hsa-DLD_0004	DLD	84	2
hsa-DLD_BN_0002.1	Homo sapiens	hsa-DLD_0002	DLD	84	2
hsa-DLD_BN_0001.1	Homo sapiens	hsa-DLD_0001	DLD	84	2
mmu-Dld_BN_0010.1	Mus musculus	mmu-Dld_0010	Dld	84	2
mmu-Dld_BN_0010.3	Mus musculus	mmu-Dld_0010	Dld	84	2
mmu-Dld_BN_0011.1	Mus musculus	mmu-Dld_0011	Dld	84	2
mmu-Dld_BN_0011.3	Mus musculus	mmu-Dld_0011	Dld	84	2
hsa_circ_BN_0132989.1	Homo sapiens	hsa_circ_0132989	DLD	84	2
hsa-DLD_BB_0014.BSJ.1	Homo sapiens	hsa-DLD_0014	DLD	84	2
hsa_circ_BN_0081905.4	Homo sapiens	hsa_circ_0081905	DLD	84	2
mmu-Dld_BN_0008.1	Mus musculus	mmu-Dld_0008	Dld	84	2
TC-hsa-DLD_BN_0014.1	Homo sapiens	TC-hsa-DLD_0014	DLD	84	2
mmu-Dld_BN_0001.1	Mus musculus	mmu-Dld_0001	Dld	84	2
mmu-Dld_BB_0008.BSJ.1	Mus musculus	mmu-Dld_0008	Dld	84	2
mmu-Dld_BB_0004.BSJ.1	Mus musculus	mmu-Dld_0004	Dld	84	2
hsa-DLD_BB_0029.BSJ.1	Homo sapiens	hsa-DLD_0029	DLD	84	2
hsa_circ_BN_0081905.3	Homo sapiens	hsa_circ_0081905	DLD	84	2
TC-hsa-DLD_BN_0010.5	Homo sapiens	TC-hsa-DLD_0010	DLD	84	2
hsa-DLD_BN_0034.3	Homo sapiens	hsa-DLD_0034	DLD	84	2
hsa-DLD_BN_0030.1	Homo sapiens	hsa-DLD_0030	DLD	84	2
hsa-DLD_BN_0029.2	Homo sapiens	hsa-DLD_0029	DLD	84	2
hsa-DLD_BN_0029.1	Homo sapiens	hsa-DLD_0029	DLD	84	2
hsa-DLD_BN_0028.3	Homo sapiens	hsa-DLD_0028	DLD	84	2
hsa-DLD_BN_0022.4	Homo sapiens	hsa-DLD_0022	DLD	84	2
TC-hsa-DLD_BN_0018.3	Homo sapiens	TC-hsa-DLD_0018	DLD	84	2
hsa_circ_BN_0081905.2	Homo sapiens	hsa_circ_0081905	DLD	84	2
hsa_circ_BN_0132988.2	Homo sapiens	hsa_circ_0132988	DLD	84	2
hsa-DLD_BN_0028.2	Homo sapiens	hsa-DLD_0028	DLD	84	2
TC-hsa-DLD_BN_0010.4	Homo sapiens	TC-hsa-DLD_0010	DLD	84	2
TC-hsa-DLD_BN_0010.3	Homo sapiens	TC-hsa-DLD_0010	DLD	84	2
TC-hsa-DLD_BN_0009.2	Homo sapiens	TC-hsa-DLD_0009	DLD	84	2
TC-hsa-DLD_BN_0009.1	Homo sapiens	TC-hsa-DLD_0009	DLD	84	2
TC-hsa-DLD_BN_0005.1	Homo sapiens	TC-hsa-DLD_0005	DLD	84	2
TC-hsa-DLD_BN_0003.1	Homo sapiens	TC-hsa-DLD_0003	DLD	84	2
TC-hsa-DLD_BN_0002.1	Homo sapiens	TC-hsa-DLD_0002	DLD	84	2
TC-hsa-DLD_BB_0002.BSJ.1	Homo sapiens	TC-hsa-DLD_0002	DLD	84	2
hsa-DPYD_BN_0030.2	Homo sapiens	hsa-DPYD_0030	DPYD	85	2
hsa-DPYD_BN_0105.1	Homo sapiens	hsa-DPYD_0105	DPYD	85	2
mmu-Dpyd_BN_0045.2	Mus musculus	mmu-Dpyd_0045	Dpyd	85	2
mmu-Dpyd_BN_0038.1	Mus musculus	mmu-Dpyd_0038	Dpyd	85	2
mmu-Dpyd_BN_0019.2	Mus musculus	mmu-Dpyd_0019	Dpyd	85	2
mmu-Dpyd_BN_0005.2	Mus musculus	mmu-Dpyd_0005	Dpyd	85	2
mmu-Dpyd_BN_0030.1	Mus musculus	mmu-Dpyd_0030	Dpyd	85	2
mmu-Ephx1_BN_0002.1	Mus musculus	mmu-Ephx1_0002	Ephx1	94	2
hsa-EPHX1_BB_0019.BSJ.1	Homo sapiens	hsa-EPHX1_0019	EPHX1	94	2
mmu-Ercc3_BN_0006.2	Mus musculus	mmu-Ercc3_0006	Ercc3	96	2
hsa-ERCC3_BB_0014.BSJ.1	Homo sapiens	hsa-ERCC3_0014	ERCC3	96	2
hsa-ERCC3_BN_0012.1	Homo sapiens	hsa-ERCC3_0012	ERCC3	96	2
hsa-ERCC3_BN_0013.1	Homo sapiens	hsa-ERCC3_0013	ERCC3	96	2
hsa-ERCC3_BN_0030.1	Homo sapiens	hsa-ERCC3_0030	ERCC3	96	2
TC-hsa-ERCC3_BN_0010.1	Homo sapiens	TC-hsa-ERCC3_0010	ERCC3	96	2
hsa_circ_BN_0117259.1	Homo sapiens	hsa_circ_0117259	ERCC3	96	2
hsa_circ_BN_0056335.1	Homo sapiens	hsa_circ_0056335	ERCC3	96	2
hsa_circ_BN_0056334.1	Homo sapiens	hsa_circ_0056334	ERCC3	96	2
hsa_circ_BN_0056332.1	Homo sapiens	hsa_circ_0056332	ERCC3	96	2
hsa_circ_BN_0056331.1	Homo sapiens	hsa_circ_0056331	ERCC3	96	2
mmu-Ercc3_BB_0005.BSJ.1	Mus musculus	mmu-Ercc3_0005	Ercc3	96	2
mmu-Ercc3_BB_0010.BSJ.1	Mus musculus	mmu-Ercc3_0010	Ercc3	96	2
hsa_circ_BB_0036404.BSJ.1	Homo sapiens	hsa_circ_0036404	ETFA	100	3
hsa_circ_BN_0036389.2	Homo sapiens	hsa_circ_0036389	ETFA	100	3
hsa-ETFA_BN_0076.1	Homo sapiens	hsa-ETFA_0076	ETFA	100	3
hsa-ETFA_BN_0076.2	Homo sapiens	hsa-ETFA_0076	ETFA	100	3
hsa-ETFA_BN_0079.1	Homo sapiens	hsa-ETFA_0079	ETFA	100	3
hsa-ETFA_BN_0081.1	Homo sapiens	hsa-ETFA_0081	ETFA	100	3
hsa-ETFA_BN_0082.1	Homo sapiens	hsa-ETFA_0082	ETFA	100	3
hsa-ETFA_BN_0087.1	Homo sapiens	hsa-ETFA_0087	ETFA	100	3
hsa-ETFA_BN_0087.2	Homo sapiens	hsa-ETFA_0087	ETFA	100	3
hsa_circ_BN_0036389.1	Homo sapiens	hsa_circ_0036389	ETFA	100	3
hsa_circ_BN_0036388.1	Homo sapiens	hsa_circ_0036388	ETFA	100	3
hsa_circ_BN_0008094.2	Homo sapiens	hsa_circ_0008094	ETFA	100	3
hsa_circ_BN_0008094.1	Homo sapiens	hsa_circ_0008094	ETFA	100	3
hsa_circ_BN_0006842.2	Homo sapiens	hsa_circ_0006842	ETFA	100	3
hsa_circ_BN_0036389.4	Homo sapiens	hsa_circ_0036389	ETFA	100	3
hsa_circ_BN_0006842.1	Homo sapiens	hsa_circ_0006842	ETFA	100	3
hsa-ETFA_BN_0071.4	Homo sapiens	hsa-ETFA_0071	ETFA	100	3
hsa_circ_BN_0036391.1	Homo sapiens	hsa_circ_0036391	ETFA	100	3
hsa-ETFA_BN_0023.1	Homo sapiens	hsa-ETFA_0023	ETFA	100	3
hsa-ETFA_BN_0024.1	Homo sapiens	hsa-ETFA_0024	ETFA	100	3
hsa-ETFA_BN_0025.2	Homo sapiens	hsa-ETFA_0025	ETFA	100	3
hsa-ETFA_BN_0026.1	Homo sapiens	hsa-ETFA_0026	ETFA	100	3
hsa-ETFA_BN_0029.1	Homo sapiens	hsa-ETFA_0029	ETFA	100	3
hsa-ETFA_BN_0032.1	Homo sapiens	hsa-ETFA_0032	ETFA	100	3
hsa-ETFA_BN_0036.1	Homo sapiens	hsa-ETFA_0036	ETFA	100	3
hsa-ETFA_BN_0040.1	Homo sapiens	hsa-ETFA_0040	ETFA	100	3
hsa-ETFA_BN_0046.1	Homo sapiens	hsa-ETFA_0046	ETFA	100	3
hsa-ETFA_BN_0063.1	Homo sapiens	hsa-ETFA_0063	ETFA	100	3
hsa-ETFA_BN_0071.1	Homo sapiens	hsa-ETFA_0071	ETFA	100	3
TC-hsa-ETFA_BN_0036.1	Homo sapiens	TC-hsa-ETFA_0036	ETFA	100	3
TC-hsa-ETFA_BN_0036.2	Homo sapiens	TC-hsa-ETFA_0036	ETFA	100	3
TC-hsa-ETFA_BN_0038.1	Homo sapiens	TC-hsa-ETFA_0038	ETFA	100	3
hsa-ETFA_BN_0071.2	Homo sapiens	hsa-ETFA_0071	ETFA	100	3
hsa_circ_BN_0036391.2	Homo sapiens	hsa_circ_0036391	ETFA	100	3
hsa_circ_BN_0005036.2	Homo sapiens	hsa_circ_0005036	ETFA	100	3
hsa_circ_BN_0003620.1	Homo sapiens	hsa_circ_0003620	ETFA	100	3
hsa_circ_BN_0000638.1	Homo sapiens	hsa_circ_0000638	ETFA	100	3
hsa_circ_BN_0036403.2	Homo sapiens	hsa_circ_0036403	ETFA	100	3
hsa_circ_BB_0036402.BSJ.1	Homo sapiens	hsa_circ_0036402	ETFA	100	3
hsa_circ_BB_0036400.BSJ.1	Homo sapiens	hsa_circ_0036400	ETFA	100	3
hsa_circ_BB_0036399.BSJ.1	Homo sapiens	hsa_circ_0036399	ETFA	100	3
hsa_circ_BB_0036398.BSJ.1	Homo sapiens	hsa_circ_0036398	ETFA	100	3
hsa_circ_BB_0036397.BSJ.1	Homo sapiens	hsa_circ_0036397	ETFA	100	3
mmu-Etfa_BN_0003.1	Mus musculus	mmu-Etfa_0003	Etfa	100	3
mmu-Etfa_BN_0003.2	Mus musculus	mmu-Etfa_0003	Etfa	100	3
hsa_circ_BN_0000638.2	Homo sapiens	hsa_circ_0000638	ETFA	100	3
hsa_circ_BN_0005036.1	Homo sapiens	hsa_circ_0005036	ETFA	100	3
hsa_circ_BN_0000638.4	Homo sapiens	hsa_circ_0000638	ETFA	100	3
hsa_circ_BN_0002226.2	Homo sapiens	hsa_circ_0002226	ETFA	100	3
hsa_circ_BN_0002226.4	Homo sapiens	hsa_circ_0002226	ETFA	100	3
mmu-Etfa_BB_0008.BSJ.1	Mus musculus	mmu-Etfa_0008	Etfa	100	3
mmu-Etfa_BB_0004.BSJ.1	Mus musculus	mmu-Etfa_0004	Etfa	100	3
mmu-Etfa_BB_0001.BSJ.1	Mus musculus	mmu-Etfa_0001	Etfa	100	3
TC-hsa-ETFA_BB_0035.BSJ.1	Homo sapiens	TC-hsa-ETFA_0035	ETFA	100	3
TC-hsa-ETFA_BB_0008.BSJ.1	Homo sapiens	TC-hsa-ETFA_0008	ETFA	100	3
ORF_ETFA_0012_BN_004	Homo sapiens	circ_ETFA_0012	ETFA	100	3
ORF_ETFA_0012_BN_002	Homo sapiens	circ_ETFA_0012	ETFA	100	3
ORF_ETFA_0012_BN_001	Homo sapiens	circ_ETFA_0012	ETFA	100	3
ORF_ETFA_0010_BN_004	Homo sapiens	circ_ETFA_0010	ETFA	100	3
ORF_ETFA_0010_BN_002	Homo sapiens	circ_ETFA_0010	ETFA	100	3
ORF_ETFA_0010_BN_001	Homo sapiens	circ_ETFA_0010	ETFA	100	3
ORF_ETFA_0007_BN_002	Homo sapiens	circ_ETFA_0007	ETFA	100	3
ORF_ETFA_0007_BN_001	Homo sapiens	circ_ETFA_0007	ETFA	100	3
ORF_ETFA_0007_BB_001	Homo sapiens	circ_ETFA_0007	ETFA	100	3
hsa_circ_BN_0002226.1	Homo sapiens	hsa_circ_0002226	ETFA	100	3
mmu-Etfa_BN_0005.1	Mus musculus	mmu-Etfa_0005	Etfa	100	3
hsa_circ_BN_0036391.4	Homo sapiens	hsa_circ_0036391	ETFA	100	3
hsa_circ_BN_0036392.2	Homo sapiens	hsa_circ_0036392	ETFA	100	3
hsa-ETFA_BB_0005.BSJ.1	Homo sapiens	hsa-ETFA_0005	ETFA	100	3
hsa-ETFA_BB_0032.BSJ.1	Homo sapiens	hsa-ETFA_0032	ETFA	100	3
hsa-ETFA_BB_0033.BSJ.1	Homo sapiens	hsa-ETFA_0033	ETFA	100	3
hsa-ETFA_BB_0044.BSJ.1	Homo sapiens	hsa-ETFA_0044	ETFA	100	3
hsa-ETFA_BB_0069.BSJ.1	Homo sapiens	hsa-ETFA_0069	ETFA	100	3
hsa-ETFA_BB_0083.BSJ.1	Homo sapiens	hsa-ETFA_0083	ETFA	100	3
hsa-ETFA_BN_0003.2	Homo sapiens	hsa-ETFA_0003	ETFA	100	3
hsa_circ_BN_0036402.2	Homo sapiens	hsa_circ_0036402	ETFA	100	3
hsa_circ_BN_0036402.1	Homo sapiens	hsa_circ_0036402	ETFA	100	3
hsa_circ_BN_0036401.1	Homo sapiens	hsa_circ_0036401	ETFA	100	3
hsa_circ_BN_0036400.4	Homo sapiens	hsa_circ_0036400	ETFA	100	3
mmu-Etfa_BB_0011.BSJ.1	Mus musculus	mmu-Etfa_0011	Etfa	100	3
hsa_circ_BN_0036400.2	Homo sapiens	hsa_circ_0036400	ETFA	100	3
mmu-Etfa_BB_0010.BSJ.1	Mus musculus	mmu-Etfa_0010	Etfa	100	3
hsa_circ_BN_0036404.1	Homo sapiens	hsa_circ_0036404	ETFA	100	3
hsa_circ_BN_0036404.2	Homo sapiens	hsa_circ_0036404	ETFA	100	3
hsa_circ_BN_0036405.1	Homo sapiens	hsa_circ_0036405	ETFA	100	3
hsa_circ_BN_0036405.2	Homo sapiens	hsa_circ_0036405	ETFA	100	3
hsa_circ_BN_0036405.4	Homo sapiens	hsa_circ_0036405	ETFA	100	3
hsa_circ_BN_0036406.1	Homo sapiens	hsa_circ_0036406	ETFA	100	3
hsa_circ_BN_0036406.2	Homo sapiens	hsa_circ_0036406	ETFA	100	3
hsa_circ_BN_0036406.4	Homo sapiens	hsa_circ_0036406	ETFA	100	3
hsa_circ_BN_0036408.2	Homo sapiens	hsa_circ_0036408	ETFA	100	3
hsa_circ_BN_0036412.1	Homo sapiens	hsa_circ_0036412	ETFA	100	3
hsa_circ_BN_0036413.1	Homo sapiens	hsa_circ_0036413	ETFA	100	3
hsa_circ_BN_0104575.1	Homo sapiens	hsa_circ_0104575	ETFA	100	3
hsa_circ_BN_0104575.2	Homo sapiens	hsa_circ_0104575	ETFA	100	3
hsa_circ_BN_0104575.4	Homo sapiens	hsa_circ_0104575	ETFA	100	3
hsa_circ_BN_0036392.1	Homo sapiens	hsa_circ_0036392	ETFA	100	3
hsa_circ_BN_0036400.1	Homo sapiens	hsa_circ_0036400	ETFA	100	3
hsa_circ_BN_0036399.1	Homo sapiens	hsa_circ_0036399	ETFA	100	3
hsa-ETFA_BN_0009.1	Homo sapiens	hsa-ETFA_0009	ETFA	100	3
hsa-ETFA_BN_0015.1	Homo sapiens	hsa-ETFA_0015	ETFA	100	3
hsa-ETFA_BN_0015.2	Homo sapiens	hsa-ETFA_0015	ETFA	100	3
hsa-ETFA_BN_0021.1	Homo sapiens	hsa-ETFA_0021	ETFA	100	3
hsa-ETFA_BN_0021.2	Homo sapiens	hsa-ETFA_0021	ETFA	100	3
hsa-ETFA_BN_0021.4	Homo sapiens	hsa-ETFA_0021	ETFA	100	3
TC-hsa-ETFA_BN_0014.1	Homo sapiens	TC-hsa-ETFA_0014	ETFA	100	3
TC-hsa-ETFA_BN_0008.1	Homo sapiens	TC-hsa-ETFA_0008	ETFA	100	3
TC-hsa-ETFA_BN_0005.2	Homo sapiens	TC-hsa-ETFA_0005	ETFA	100	3
TC-hsa-ETFA_BN_0005.1	Homo sapiens	TC-hsa-ETFA_0005	ETFA	100	3
TC-hsa-ETFA_BN_0004.2	Homo sapiens	TC-hsa-ETFA_0004	ETFA	100	3
TC-hsa-ETFA_BN_0004.1	Homo sapiens	TC-hsa-ETFA_0004	ETFA	100	3
TC-hsa-ETFA_BN_0003.2	Homo sapiens	TC-hsa-ETFA_0003	ETFA	100	3
TC-hsa-ETFA_BN_0003.1	Homo sapiens	TC-hsa-ETFA_0003	ETFA	100	3
TC-hsa-ETFA_BN_0002.1	Homo sapiens	TC-hsa-ETFA_0002	ETFA	100	3
hsa-ETFA_BN_0008.2	Homo sapiens	hsa-ETFA_0008	ETFA	100	3
hsa_circ_BN_0036399.2	Homo sapiens	hsa_circ_0036399	ETFA	100	3
hsa-ETFA_BN_0008.1	Homo sapiens	hsa-ETFA_0008	ETFA	100	3
hsa-ETFA_BN_0007.1	Homo sapiens	hsa-ETFA_0007	ETFA	100	3
hsa_circ_BN_0036398.1	Homo sapiens	hsa_circ_0036398	ETFA	100	3
hsa_circ_BN_0036395.4	Homo sapiens	hsa_circ_0036395	ETFA	100	3
hsa_circ_BN_0036395.2	Homo sapiens	hsa_circ_0036395	ETFA	100	3
hsa_circ_BN_0036395.1	Homo sapiens	hsa_circ_0036395	ETFA	100	3
hsa_circ_BN_0036394.2	Homo sapiens	hsa_circ_0036394	ETFA	100	3
hsa_circ_BN_0036394.1	Homo sapiens	hsa_circ_0036394	ETFA	100	3
hsa_circ_BN_0036393.2	Homo sapiens	hsa_circ_0036393	ETFA	100	3
hsa_circ_BN_0036393.1	Homo sapiens	hsa_circ_0036393	ETFA	100	3
TC-hsa-ETFA_BN_0035.2	Homo sapiens	TC-hsa-ETFA_0035	ETFA	100	3
TC-hsa-ETFA_BN_0035.1	Homo sapiens	TC-hsa-ETFA_0035	ETFA	100	3
TC-hsa-ETFA_BN_0034.2	Homo sapiens	TC-hsa-ETFA_0034	ETFA	100	3
TC-hsa-ETFA_BN_0034.1	Homo sapiens	TC-hsa-ETFA_0034	ETFA	100	3
TC-hsa-ETFA_BN_0018.2	Homo sapiens	TC-hsa-ETFA_0018	ETFA	100	3
TC-hsa-ETFA_BN_0018.1	Homo sapiens	TC-hsa-ETFA_0018	ETFA	100	3
hsa-ETFA_BN_0005.1	Homo sapiens	hsa-ETFA_0005	ETFA	100	3
hsa-ETFA_BN_0007.2	Homo sapiens	hsa-ETFA_0007	ETFA	100	3
hsa_circ_BN_0036403.1	Homo sapiens	hsa_circ_0036403	ETFA	100	3
mmu-Etfa_BN_0010.1	Mus musculus	mmu-Etfa_0010	Etfa	100	3
mmu-Etfa_BN_0019.1	Mus musculus	mmu-Etfa_0019	Etfa	100	3
SRR13142123_BN_45824gene=Etfa.1	Mus musculus	SRR13142123_45824	Etfa	100	3
SRR9849862_BN_1997gene=etfa.1	Danio rerio	SRR9849862_1997	etfa	100	3
SRR9849856_BN_2957gene=etfa.1	Danio rerio	SRR9849856_2957	etfa	100	3
ORF_ETFA_0002_BN_002	Homo sapiens	circ_ETFA_0002	ETFA	100	3
ORF_ETFA_0004_BB_001	Homo sapiens	circ_ETFA_0004	ETFA	100	3
ORF_ETFA_0004_BN_001	Homo sapiens	circ_ETFA_0004	ETFA	100	3
ORF_ETFA_0004_BN_002	Homo sapiens	circ_ETFA_0004	ETFA	100	3
ORF_ETFA_0005_BN_001	Homo sapiens	circ_ETFA_0005	ETFA	100	3
SRR11425582_BN_125302gene=Etfa.2	Mus musculus	SRR11425582_125302	Etfa	100	3
ORF_ETFA_0006_BN_001	Homo sapiens	circ_ETFA_0006	ETFA	100	3
SRR13142109_BN_6543gene=Etfa.1	Mus musculus	SRR13142109_6543	Etfa	100	3
mmu-Etfa_BN_0007.1	Mus musculus	mmu-Etfa_0007	Etfa	100	3
SRR13142117_BN_44304gene=Etfa.1	Mus musculus	SRR13142117_44304	Etfa	100	3
SRR13142117_BN_44304gene=Etfa.2	Mus musculus	SRR13142117_44304	Etfa	100	3
SRR13142117_BN_44304gene=Etfa.3	Mus musculus	SRR13142117_44304	Etfa	100	3
SRR13142117_BN_44304gene=Etfa.4	Mus musculus	SRR13142117_44304	Etfa	100	3
SRR13142121_BB_41116gene=Etfa.BSJ.1	Mus musculus	SRR13142121_41116	Etfa	100	3
SRR13142121_BN_41116gene=Etfa.1	Mus musculus	SRR13142121_41116	Etfa	100	3
hsa-ETFA_BN_0087.4	Homo sapiens	hsa-ETFA_0087	ETFA	100	3
mmu-Etfa_BN_0015.2	Mus musculus	mmu-Etfa_0015	Etfa	100	3
ORF_ETFA_0001_BN_001	Homo sapiens	circ_ETFA_0001	ETFA	100	3
SRR13142109_BN_6543gene=Etfa.3	Mus musculus	SRR13142109_6543	Etfa	100	3
SRR13142109_BN_6543gene=Etfa.4	Mus musculus	SRR13142109_6543	Etfa	100	3
mmu-Etfa_BN_0010.3	Mus musculus	mmu-Etfa_0010	Etfa	100	3
SRR13142109_BN_6543gene=Etfa.5	Mus musculus	SRR13142109_6543	Etfa	100	3
SRR13142110_BN_9064gene=Etfa.1	Mus musculus	SRR13142110_9064	Etfa	100	3
ORF_ETFA_0002_BN_001	Homo sapiens	circ_ETFA_0002	ETFA	100	3
mmu-Etfa_BN_0010.2	Mus musculus	mmu-Etfa_0010	Etfa	100	3
SRR13142109_BN_6543gene=Etfa.2	Mus musculus	SRR13142109_6543	Etfa	100	3
SRR13142110_BN_9064gene=Etfa.3	Mus musculus	SRR13142110_9064	Etfa	100	3
SRR13142110_BN_9064gene=Etfa.4	Mus musculus	SRR13142110_9064	Etfa	100	3
SRR13142110_BN_9064gene=Etfa.2	Mus musculus	SRR13142110_9064	Etfa	100	3
ORF_ETFA_0001_BN_002	Homo sapiens	circ_ETFA_0001	ETFA	100	3
mmu-Fancc_BB_0020.BSJ.1	Mus musculus	mmu-Fancc_0020	Fancc	109	2
mmu-Fancc_BB_0052.BSJ.1	Mus musculus	mmu-Fancc_0052	Fancc	109	2
hsa_circ_BN_0139394.1	Homo sapiens	hsa_circ_0139394	FANCC	109	2
mmu-Fancc_BN_0008.1	Mus musculus	mmu-Fancc_0008	Fancc	109	2
mmu-Fancc_BN_0021.1	Mus musculus	mmu-Fancc_0021	Fancc	109	2
mmu-Fancc_BN_0018.1	Mus musculus	mmu-Fancc_0018	Fancc	109	2
mmu-Fancc_BN_0017.1	Mus musculus	mmu-Fancc_0017	Fancc	109	2
mmu-Fancc_BN_0011.1	Mus musculus	mmu-Fancc_0011	Fancc	109	2
hsa_circ_BB_0087599.BSJ.1	Homo sapiens	hsa_circ_0087599	FANCC	109	2
mmu-Fancc_BN_0013.1	Mus musculus	mmu-Fancc_0013	Fancc	109	2
mmu-Fancc_BN_0031.1	Mus musculus	mmu-Fancc_0031	Fancc	109	2
mmu-Fancc_BN_0025.1	Mus musculus	mmu-Fancc_0025	Fancc	109	2
mmu-Fancc_BN_0016.1	Mus musculus	mmu-Fancc_0016	Fancc	109	2
hsa-FANCC_BN_0036.3	Homo sapiens	hsa-FANCC_0036	FANCC	109	2
hsa-FANCC_BN_0057.1	Homo sapiens	hsa-FANCC_0057	FANCC	109	2
hsa-FANCC_BB_0012.BSJ.1	Homo sapiens	hsa-FANCC_0012	FANCC	109	2
hsa-FANCC_BB_0013.BSJ.1	Homo sapiens	hsa-FANCC_0013	FANCC	109	2
hsa-FANCC_BN_0085.1	Homo sapiens	hsa-FANCC_0085	FANCC	109	2
hsa-FANCC_BB_0074.BSJ.1	Homo sapiens	hsa-FANCC_0074	FANCC	109	2
hsa-FANCC_BN_0006.1	Homo sapiens	hsa-FANCC_0006	FANCC	109	2
hsa-FANCC_BN_0018.1	Homo sapiens	hsa-FANCC_0018	FANCC	109	2
hsa-FANCC_BN_0021.2	Homo sapiens	hsa-FANCC_0021	FANCC	109	2
hsa-FANCC_BN_0023.2	Homo sapiens	hsa-FANCC_0023	FANCC	109	2
mmu-Fancc_BN_0032.1	Mus musculus	mmu-Fancc_0032	Fancc	109	2
mmu-Fancc_BN_0036.1	Mus musculus	mmu-Fancc_0036	Fancc	109	2
mmu-Fancc_BN_0040.2	Mus musculus	mmu-Fancc_0040	Fancc	109	2
mmu-Fancc_BN_0001.1	Mus musculus	mmu-Fancc_0001	Fancc	109	2
mmu-Fancc_BN_0052.1	Mus musculus	mmu-Fancc_0052	Fancc	109	2
SRR11425580_BN_50613gene=Fech.2	Mus musculus	SRR11425580_50613	Fech	113	2
mmu-Fech_BN_0010.2	Mus musculus	mmu-Fech_0010	Fech	113	2
mmu-Fech_BN_0003.3	Mus musculus	mmu-Fech_0003	Fech	113	2
mmu-Fech_BN_0001.2	Mus musculus	mmu-Fech_0001	Fech	113	2
hsa-FECH_BB_0036.BSJ.1	Homo sapiens	hsa-FECH_0036	FECH	113	2
hsa_circ_BB_0047755.BSJ.1	Homo sapiens	hsa_circ_0047755	FECH	113	2
mmu-Fech_BN_0006.2	Mus musculus	mmu-Fech_0006	Fech	113	2
mmu-Fech_BN_0007.2	Mus musculus	mmu-Fech_0007	Fech	113	2
hsa_circ_BN_0017190.3	Homo sapiens	hsa_circ_0017190	FH	115	2
hsa_circ_BB_0112730.BSJ.1	Homo sapiens	hsa_circ_0112730	FH	115	2
hsa-FH_BN_0015.3	Homo sapiens	hsa-FH_0015	FH	115	2
TC-hsa-FH_BN_0010.2	Homo sapiens	TC-hsa-FH_0010	FH	115	2
TC-hsa-FH_BB_0012.BSJ.1	Homo sapiens	TC-hsa-FH_0012	FH	115	2
TC-hsa-FH_BN_0002.3	Homo sapiens	TC-hsa-FH_0002	FH	115	2
TC-hsa-FH_BN_0005.3	Homo sapiens	TC-hsa-FH_0005	FH	115	2
hsa-FH_BN_0004.1	Homo sapiens	hsa-FH_0004	FH	115	2
TC-hsa-FH_BN_0008.3	Homo sapiens	TC-hsa-FH_0008	FH	115	2
mmu-Fh1_BN_0011.2	Mus musculus	mmu-Fh1_0011	Fh1	115	2
mmu-Fh1_BN_0011.1	Mus musculus	mmu-Fh1_0011	Fh1	115	2
hsa-FH_BB_0016.BSJ.1	Homo sapiens	hsa-FH_0016	FH	115	2
hsa-FH_BB_0006.BSJ.1	Homo sapiens	hsa-FH_0006	FH	115	2
mmu-Fh1_BB_0002.BSJ.1	Mus musculus	mmu-Fh1_0002	Fh1	115	2
hsa-FUCA2_BN_0020.1	Homo sapiens	hsa-FUCA2_0020	FUCA2	119	2
hsa-FUCA2_BN_0007.1	Homo sapiens	hsa-FUCA2_0007	FUCA2	119	2
mmu-Fuca2_BB_0001.BSJ.1	Mus musculus	mmu-Fuca2_0001	Fuca2	119	2
mmu-Galc_BB_0011.BSJ.1	Mus musculus	mmu-Galc_0011	Galc	124	2
TC-hsa-GALC_BB_0012.BSJ.1	Homo sapiens	TC-hsa-GALC_0012	GALC	124	2
mmu-Galk1_BN_0001.2	Mus musculus	mmu-Galk1_0001	Galk1	125	2
hsa-GALK1_BN_0001.1	Homo sapiens	hsa-GALK1_0001	GALK1	125	2
hsa_circ_BN_0045711.1	Homo sapiens	hsa_circ_0045711	GALK1	125	2
hsa_circ_BN_0066583.1	Homo sapiens	hsa_circ_0066583	GBE1	129	2
hsa_circ_BN_0066581.1	Homo sapiens	hsa_circ_0066581	GBE1	129	2
hsa_circ_BN_0066582.1	Homo sapiens	hsa_circ_0066582	GBE1	129	2
hsa_circ_BN_0066586.1	Homo sapiens	hsa_circ_0066586	GBE1	129	2
hsa_circ_BN_0066587.1	Homo sapiens	hsa_circ_0066587	GBE1	129	2
hsa_circ_BN_0066588.1	Homo sapiens	hsa_circ_0066588	GBE1	129	2
hsa_circ_BN_0066578.2	Homo sapiens	hsa_circ_0066578	GBE1	129	2
hsa-GBE1_BB_0009.BSJ.1	Homo sapiens	hsa-GBE1_0009	GBE1	129	2
hsa-GBE1_BB_0010.BSJ.1	Homo sapiens	hsa-GBE1_0010	GBE1	129	2
hsa-GBE1_BB_0014.BSJ.1	Homo sapiens	hsa-GBE1_0014	GBE1	129	2
hsa-GBE1_BN_0011.1	Homo sapiens	hsa-GBE1_0011	GBE1	129	2
hsa_circ_BN_0066584.1	Homo sapiens	hsa_circ_0066584	GBE1	129	2
hsa_circ_BN_0066578.1	Homo sapiens	hsa_circ_0066578	GBE1	129	2
hsa_circ_BN_0066576.7	Homo sapiens	hsa_circ_0066576	GBE1	129	2
hsa_circ_BN_0066577.6	Homo sapiens	hsa_circ_0066577	GBE1	129	2
hsa_circ_BN_0066572.5	Homo sapiens	hsa_circ_0066572	GBE1	129	2
hsa_circ_BN_0007824.1	Homo sapiens	hsa_circ_0007824	GBE1	129	2
hsa_circ_BB_0066588.BSJ.1	Homo sapiens	hsa_circ_0066588	GBE1	129	2
hsa_circ_BB_0066583.BSJ.1	Homo sapiens	hsa_circ_0066583	GBE1	129	2
hsa_circ_BB_0066577.BSJ.1	Homo sapiens	hsa_circ_0066577	GBE1	129	2
hsa_circ_BN_0066573.5	Homo sapiens	hsa_circ_0066573	GBE1	129	2
hsa_circ_BN_0066573.6	Homo sapiens	hsa_circ_0066573	GBE1	129	2
hsa_circ_BN_0066577.5	Homo sapiens	hsa_circ_0066577	GBE1	129	2
hsa_circ_BN_0066576.6	Homo sapiens	hsa_circ_0066576	GBE1	129	2
hsa_circ_BN_0066576.5	Homo sapiens	hsa_circ_0066576	GBE1	129	2
hsa_circ_BN_0066577.7	Homo sapiens	hsa_circ_0066577	GBE1	129	2
hsa_circ_BN_0066575.5	Homo sapiens	hsa_circ_0066575	GBE1	129	2
hsa_circ_BN_0066574.6	Homo sapiens	hsa_circ_0066574	GBE1	129	2
hsa_circ_BN_0066574.5	Homo sapiens	hsa_circ_0066574	GBE1	129	2
hsa_circ_BN_0066575.6	Homo sapiens	hsa_circ_0066575	GBE1	129	2
hsa-GBE1_BN_0033.1	Homo sapiens	hsa-GBE1_0033	GBE1	129	2
hsa-GBE1_BN_0023.1	Homo sapiens	hsa-GBE1_0023	GBE1	129	2
mmu-Gbe1_BB_0021.BSJ.1	Mus musculus	mmu-Gbe1_0021	Gbe1	129	2
mmu-Gbe1_BB_0015.BSJ.1	Mus musculus	mmu-Gbe1_0015	Gbe1	129	2
mmu-Gbe1_BB_0009.BSJ.1	Mus musculus	mmu-Gbe1_0009	Gbe1	129	2
mmu-Gbe1_BB_0008.BSJ.1	Mus musculus	mmu-Gbe1_0008	Gbe1	129	2
mmu_circ_BN_0006376.1	Mus musculus	mmu_circ_0006376	Gbe1	129	2
mmu-Gbe1_BN_0015.1	Mus musculus	mmu-Gbe1_0015	Gbe1	129	2
mmu-Gbe1_BN_0019.1	Mus musculus	mmu-Gbe1_0019	Gbe1	129	2
mmu-Gbe1_BN_0026.1	Mus musculus	mmu-Gbe1_0026	Gbe1	129	2
mmu-Gbe1_BB_0044.BSJ.1	Mus musculus	mmu-Gbe1_0044	Gbe1	129	2
mmu-Gbe1_BN_0006.3	Mus musculus	mmu-Gbe1_0006	Gbe1	129	2
mmu-Gbe1_BN_0009.2	Mus musculus	mmu-Gbe1_0009	Gbe1	129	2
mmu-Gbe1_BN_0012.1	Mus musculus	mmu-Gbe1_0012	Gbe1	129	2
mmu-Gbe1_BN_0013.1	Mus musculus	mmu-Gbe1_0013	Gbe1	129	2
mmu-Gbe1_BN_0006.2	Mus musculus	mmu-Gbe1_0006	Gbe1	129	2
mmu-Gbe1_BN_0006.1	Mus musculus	mmu-Gbe1_0006	Gbe1	129	2
mmu-Gbe1_BN_0014.2	Mus musculus	mmu-Gbe1_0014	Gbe1	129	2
mmu-Gbe1_BN_0002.1	Mus musculus	mmu-Gbe1_0002	Gbe1	129	2
mmu-Gbe1_BN_0001.2	Mus musculus	mmu-Gbe1_0001	Gbe1	129	2
mmu-Gbe1_BB_0052.BSJ.1	Mus musculus	mmu-Gbe1_0052	Gbe1	129	2
SRR11425581_BN_138954gene=Gbe1.1	Mus musculus	SRR11425581_138954	Gbe1	129	2
TC-hsa-GBE1_BN_0029.1	Homo sapiens	TC-hsa-GBE1_0029	GBE1	129	2
TC-hsa-GBE1_BN_0028.1	Homo sapiens	TC-hsa-GBE1_0028	GBE1	129	2
SRR11425580_BN_94416gene=Gbe1.1	Mus musculus	SRR11425580_94416	Gbe1	129	2
TC-hsa-GBE1_BN_0026.1	Homo sapiens	TC-hsa-GBE1_0026	GBE1	129	2
TC-hsa-GBE1_BN_0023.1	Homo sapiens	TC-hsa-GBE1_0023	GBE1	129	2
TC-hsa-GBE1_BN_0018.1	Homo sapiens	TC-hsa-GBE1_0018	GBE1	129	2
TC-hsa-GBE1_BN_0009.1	Homo sapiens	TC-hsa-GBE1_0009	GBE1	129	2
mmu-Gbe1_BN_0059.2	Mus musculus	mmu-Gbe1_0059	Gbe1	129	2
TC-hsa-GBE1_BN_0031.1	Homo sapiens	TC-hsa-GBE1_0031	GBE1	129	2
TC-hsa-GBE1_BB_0031.BSJ.1	Homo sapiens	TC-hsa-GBE1_0031	GBE1	129	2
TC-hsa-GBE1_BN_0004.1	Homo sapiens	TC-hsa-GBE1_0004	GBE1	129	2
mmu-Gbe1_BN_0045.1	Mus musculus	mmu-Gbe1_0045	Gbe1	129	2
hsa-GBE1_BN_0061.1	Homo sapiens	hsa-GBE1_0061	GBE1	129	2
hsa-GBE1_BN_0066.1	Homo sapiens	hsa-GBE1_0066	GBE1	129	2
hsa-GBE1_BN_0068.1	Homo sapiens	hsa-GBE1_0068	GBE1	129	2
hsa-GBE1_BN_0086.1	Homo sapiens	hsa-GBE1_0086	GBE1	129	2
mmu-Gbe1_BN_0050.1	Mus musculus	mmu-Gbe1_0050	Gbe1	129	2
hsa-GBE1_BN_0086.2	Homo sapiens	hsa-GBE1_0086	GBE1	129	2
TC-hsa-GBE1_BB_0023.BSJ.1	Homo sapiens	TC-hsa-GBE1_0023	GBE1	129	2
TC-hsa-GBE1_BB_0028.BSJ.1	Homo sapiens	TC-hsa-GBE1_0028	GBE1	129	2
TC-hsa-GBE1_BB_0022.BSJ.1	Homo sapiens	TC-hsa-GBE1_0022	GBE1	129	2
TC-hsa-GBE1_BN_0006.1	Homo sapiens	TC-hsa-GBE1_0006	GBE1	129	2
mmu-Gjb1_BB_0009.BSJ.1	Mus musculus	mmu-Gjb1_0009	Gjb1	137	2
hsa-GJB1_BN_0005.1	Homo sapiens	hsa-GJB1_0005	GJB1	137	2
TC-hsa-GLDC_BN_0026.1	Homo sapiens	TC-hsa-GLDC_0026	GLDC	141	2
TC-hsa-GLDC_BN_0024.2	Homo sapiens	TC-hsa-GLDC_0024	GLDC	141	2
hsa-GLDC_BN_0019.3	Homo sapiens	hsa-GLDC_0019	GLDC	141	2
TC-hsa-GLDC_BN_0022.2	Homo sapiens	TC-hsa-GLDC_0022	GLDC	141	2
hsa-GLDC_BN_0041.2	Homo sapiens	hsa-GLDC_0041	GLDC	141	2
hsa-GLDC_BN_0056.2	Homo sapiens	hsa-GLDC_0056	GLDC	141	2
TC-hsa-GLDC_BN_0010.3	Homo sapiens	TC-hsa-GLDC_0010	GLDC	141	2
TC-hsa-GLDC_BN_0017.3	Homo sapiens	TC-hsa-GLDC_0017	GLDC	141	2
TC-hsa-GLDC_BN_0018.3	Homo sapiens	TC-hsa-GLDC_0018	GLDC	141	2
mmu-Gldc_BB_0011.BSJ.1	Mus musculus	mmu-Gldc_0011	Gldc	141	2
hsa-GLDC_BN_0025.1	Homo sapiens	hsa-GLDC_0025	GLDC	141	2
TC-hsa-GLDC_BN_0023.2	Homo sapiens	TC-hsa-GLDC_0023	GLDC	141	2
hsa_circ_BN_0086321.3	Homo sapiens	hsa_circ_0086321	GLDC	141	2
hsa_circ_BN_0086320.3	Homo sapiens	hsa_circ_0086320	GLDC	141	2
hsa_circ_BN_0086318.3	Homo sapiens	hsa_circ_0086318	GLDC	141	2
hsa-GLDC_BN_0002.3	Homo sapiens	hsa-GLDC_0002	GLDC	141	2
hsa-GLDC_BN_0008.1	Homo sapiens	hsa-GLDC_0008	GLDC	141	2
hsa-GLDC_BN_0004.3	Homo sapiens	hsa-GLDC_0004	GLDC	141	2
hsa_circ_BN_0050493.10	Homo sapiens	hsa_circ_0050493	GPI	145	2
mmu-Gpi1_BB_0020.BSJ.1	Mus musculus	mmu-Gpi1_0020	Gpi1	145	2
hsa_circ_BN_0050491.10	Homo sapiens	hsa_circ_0050491	GPI	145	2
mmu-Gpi1_BN_0024.1	Mus musculus	mmu-Gpi1_0024	Gpi1	145	2
mmu-Gpi1_BN_0024.2	Mus musculus	mmu-Gpi1_0024	Gpi1	145	2
hsa_circ_BN_0050491.9	Homo sapiens	hsa_circ_0050491	GPI	145	2
hsa_circ_BN_0050496.1	Homo sapiens	hsa_circ_0050496	GPI	145	2
hsa_circ_BN_0050502.9	Homo sapiens	hsa_circ_0050502	GPI	145	2
hsa_circ_BN_0050501.9	Homo sapiens	hsa_circ_0050501	GPI	145	2
hsa_circ_BN_0050500.9	Homo sapiens	hsa_circ_0050500	GPI	145	2
hsa_circ_BN_0050497.9	Homo sapiens	hsa_circ_0050497	GPI	145	2
hsa_circ_BN_0050497.10	Homo sapiens	hsa_circ_0050497	GPI	145	2
hsa_circ_BN_0050493.9	Homo sapiens	hsa_circ_0050493	GPI	145	2
hsa_circ_BN_0050490.1	Homo sapiens	hsa_circ_0050490	GPI	145	2
hsa_circ_BB_0050489.BSJ.1	Homo sapiens	hsa_circ_0050489	GPI	145	2
hsa_circ_BB_0050500.BSJ.1	Homo sapiens	hsa_circ_0050500	GPI	145	2
hsa_circ_BN_0050480.10	Homo sapiens	hsa_circ_0050480	GPI	145	2
hsa_circ_BN_0050489.1	Homo sapiens	hsa_circ_0050489	GPI	145	2
hsa_circ_BN_0050485.9	Homo sapiens	hsa_circ_0050485	GPI	145	2
hsa_circ_BN_0050485.10	Homo sapiens	hsa_circ_0050485	GPI	145	2
hsa_circ_BN_0050483.2	Homo sapiens	hsa_circ_0050483	GPI	145	2
hsa_circ_BN_0050483.1	Homo sapiens	hsa_circ_0050483	GPI	145	2
hsa_circ_BN_0050480.9	Homo sapiens	hsa_circ_0050480	GPI	145	2
hsa_circ_BN_0050498.1	Homo sapiens	hsa_circ_0050498	GPI	145	2
hsa-GPI_BB_0056.BSJ.1	Homo sapiens	hsa-GPI_0056	GPI	145	2
hsa-GPI_BB_0007.BSJ.1	Homo sapiens	hsa-GPI_0007	GPI	145	2
TC-hsa-GPI_BN_0013.1	Homo sapiens	TC-hsa-GPI_0013	GPI	145	2
TC-hsa-GPI_BN_0009.3	Homo sapiens	TC-hsa-GPI_0009	GPI	145	2
TC-hsa-GPI_BN_0009.2	Homo sapiens	TC-hsa-GPI_0009	GPI	145	2
TC-hsa-GPI_BN_0008.1	Homo sapiens	TC-hsa-GPI_0008	GPI	145	2
hsa-GPI_BB_0028.BSJ.1	Homo sapiens	hsa-GPI_0028	GPI	145	2
mmu-Gsn_BN_0076.2	Mus musculus	mmu-Gsn_0076	Gsn	147	2
mmu-Gsn_BN_0073.1	Mus musculus	mmu-Gsn_0073	Gsn	147	2
mmu-Gsn_BN_0034.1	Mus musculus	mmu-Gsn_0034	Gsn	147	2
mmu-Gsn_BN_0018.1	Mus musculus	mmu-Gsn_0018	Gsn	147	2
mmu-Gsn_BN_0016.1	Mus musculus	mmu-Gsn_0016	Gsn	147	2
mmu-Gsn_BN_0011.1	Mus musculus	mmu-Gsn_0011	Gsn	147	2
mmu-Gsn_BB_0084.BSJ.1	Mus musculus	mmu-Gsn_0084	Gsn	147	2
mmu-Gsn_BN_0050.1	Mus musculus	mmu-Gsn_0050	Gsn	147	2
mmu-Gsn_BB_0082.BSJ.1	Mus musculus	mmu-Gsn_0082	Gsn	147	2
mmu-Gsn_BB_0072.BSJ.1	Mus musculus	mmu-Gsn_0072	Gsn	147	2
mmu-Gsn_BB_0067.BSJ.1	Mus musculus	mmu-Gsn_0067	Gsn	147	2
mmu-Gsn_BB_0060.BSJ.1	Mus musculus	mmu-Gsn_0060	Gsn	147	2
mmu-Gsn_BB_0056.BSJ.1	Mus musculus	mmu-Gsn_0056	Gsn	147	2
TC-hsa-GSN_BN_0011.4	Homo sapiens	TC-hsa-GSN_0011	GSN	147	2
TC-hsa-GSN_BN_0011.3	Homo sapiens	TC-hsa-GSN_0011	GSN	147	2
hsa-GSN_BN_0020.1	Homo sapiens	hsa-GSN_0020	GSN	147	2
hsa-GSN_BN_0020.2	Homo sapiens	hsa-GSN_0020	GSN	147	2
TC-hsa-GSN_BN_0011.1	Homo sapiens	TC-hsa-GSN_0011	GSN	147	2
TC-hsa-GSN_BN_0009.2	Homo sapiens	TC-hsa-GSN_0009	GSN	147	2
TC-hsa-GSN_BN_0009.1	Homo sapiens	TC-hsa-GSN_0009	GSN	147	2
TC-hsa-GSN_BN_0006.1	Homo sapiens	TC-hsa-GSN_0006	GSN	147	2
TC-hsa-GSN_BB_0010.BSJ.1	Homo sapiens	TC-hsa-GSN_0010	GSN	147	2
hsa-GSN_BN_0063.1	Homo sapiens	hsa-GSN_0063	GSN	147	2
hsa-GSN_BN_0052.1	Homo sapiens	hsa-GSN_0052	GSN	147	2
hsa-GSN_BN_0036.1	Homo sapiens	hsa-GSN_0036	GSN	147	2
hsa-GSN_BN_0033.2	Homo sapiens	hsa-GSN_0033	GSN	147	2
hsa-GSN_BN_0033.1	Homo sapiens	hsa-GSN_0033	GSN	147	2
hsa-GSN_BN_0010.1	Homo sapiens	hsa-GSN_0010	GSN	147	2
hsa-GSN_BB_0049.BSJ.1	Homo sapiens	hsa-GSN_0049	GSN	147	2
hsa-GSN_BB_0047.BSJ.1	Homo sapiens	hsa-GSN_0047	GSN	147	2
mmu-Gsn_BB_0029.BSJ.1	Mus musculus	mmu-Gsn_0029	Gsn	147	2
mmu-Gsn_BB_0028.BSJ.2	Mus musculus	mmu-Gsn_0028	Gsn	147	2
mmu-Gsn_BB_0028.BSJ.1	Mus musculus	mmu-Gsn_0028	Gsn	147	2
mmu-Gsn_BB_0026.BSJ.1	Mus musculus	mmu-Gsn_0026	Gsn	147	2
mmu-Gsn_BB_0021.BSJ.1	Mus musculus	mmu-Gsn_0021	Gsn	147	2
mmu-Gsn_BB_0016.BSJ.1	Mus musculus	mmu-Gsn_0016	Gsn	147	2
mmu-Gsn_BB_0008.BSJ.1	Mus musculus	mmu-Gsn_0008	Gsn	147	2
mmu-Gsn_BB_0005.BSJ.1	Mus musculus	mmu-Gsn_0005	Gsn	147	2
mmu-Gsn_BB_0039.BSJ.1	Mus musculus	mmu-Gsn_0039	Gsn	147	2
hsa_circ_BB_0088342.BSJ.1	Homo sapiens	hsa_circ_0088342	GSN	147	2
hsa_circ_BN_0088340.1	Homo sapiens	hsa_circ_0088340	GSN	147	2
hsa_circ_BN_0088341.1	Homo sapiens	hsa_circ_0088341	GSN	147	2
hsa_circ_BN_0088341.2	Homo sapiens	hsa_circ_0088341	GSN	147	2
hsa_circ_BN_0088342.2	Homo sapiens	hsa_circ_0088342	GSN	147	2
hsa_circ_BN_0088342.3	Homo sapiens	hsa_circ_0088342	GSN	147	2
hsa_circ_BN_0088343.2	Homo sapiens	hsa_circ_0088343	GSN	147	2
hsa_circ_BN_0088343.3	Homo sapiens	hsa_circ_0088343	GSN	147	2
hsa-GSN_BB_0003.BSJ.1	Homo sapiens	hsa-GSN_0003	GSN	147	2
hsa-GSN_BB_0009.BSJ.1	Homo sapiens	hsa-GSN_0009	GSN	147	2
hsa-GSN_BB_0010.BSJ.1	Homo sapiens	hsa-GSN_0010	GSN	147	2
hsa-GSN_BB_0026.BSJ.1	Homo sapiens	hsa-GSN_0026	GSN	147	2
hsa-GSN_BB_0032.BSJ.1	Homo sapiens	hsa-GSN_0032	GSN	147	2
hsa-GSN_BB_0035.BSJ.1	Homo sapiens	hsa-GSN_0035	GSN	147	2
hsa_circ_BN_0088339.1	Homo sapiens	hsa_circ_0088339	GSN	147	2
mmu-Msh6_BB_0002.BSJ.1	Mus musculus	mmu-Msh6_0002	Msh6	149	2
hsa-MSH6_BN_0048.1	Homo sapiens	hsa-MSH6_0048	MSH6	149	2
mmu-Hadha_BB_0048.BSJ.1	Mus musculus	mmu-Hadha_0048	Hadha	152	2
mmu-Hadha_BB_0047.BSJ.1	Mus musculus	mmu-Hadha_0047	Hadha	152	2
mmu-Hadha_BB_0038.BSJ.1	Mus musculus	mmu-Hadha_0038	Hadha	152	2
mmu-Hadha_BB_0033.BSJ.1	Mus musculus	mmu-Hadha_0033	Hadha	152	2
mmu-Hadha_BN_0039.1	Mus musculus	mmu-Hadha_0039	Hadha	152	2
mmu-Hadha_BN_0038.1	Mus musculus	mmu-Hadha_0038	Hadha	152	2
hsa-HADHA_BB_0001.BSJ.1	Homo sapiens	hsa-HADHA_0001	HADHA	152	2
mmu-Hadha_BN_0026.1	Mus musculus	mmu-Hadha_0026	Hadha	152	2
mmu-Hadha_BN_0021.1	Mus musculus	mmu-Hadha_0021	Hadha	152	2
mmu-Hadha_BN_0044.1	Mus musculus	mmu-Hadha_0044	Hadha	152	2
mmu-Hadha_BN_0020.1	Mus musculus	mmu-Hadha_0020	Hadha	152	2
mmu-Hadha_BN_0019.1	Mus musculus	mmu-Hadha_0019	Hadha	152	2
mmu-Hadha_BN_0017.1	Mus musculus	mmu-Hadha_0017	Hadha	152	2
mmu-Hadha_BN_0016.2	Mus musculus	mmu-Hadha_0016	Hadha	152	2
mmu-Hadha_BN_0010.1	Mus musculus	mmu-Hadha_0010	Hadha	152	2
hsa-HADHA_BB_0002.BSJ.1	Homo sapiens	hsa-HADHA_0002	HADHA	152	2
hsa-HADHA_BN_0052.2	Homo sapiens	hsa-HADHA_0052	HADHA	152	2
hsa-HADHA_BN_0053.2	Homo sapiens	hsa-HADHA_0053	HADHA	152	2
ORF_HADHA_0001_BN_001	Homo sapiens	circ_HADHA_0001	HADHA	152	2
TC-hsa-HADHA_BN_0001.2	Homo sapiens	TC-hsa-HADHA_0001	HADHA	152	2
TC-hsa-HADHA_BN_0019.1	Homo sapiens	TC-hsa-HADHA_0019	HADHA	152	2
TC-hsa-HADHA_BN_0021.1	Homo sapiens	TC-hsa-HADHA_0021	HADHA	152	2
hsa-HADHA_BB_0030.BSJ.1	Homo sapiens	hsa-HADHA_0030	HADHA	152	2
hsa-HADHA_BN_0025.2	Homo sapiens	hsa-HADHA_0025	HADHA	152	2
mmu-Hadha_BN_0056.1	Mus musculus	mmu-Hadha_0056	Hadha	152	2
hsa_circ_BN_0053052.4	Homo sapiens	hsa_circ_0053052	HADHA	152	2
hsa_circ_BN_0053064.1	Homo sapiens	hsa_circ_0053064	HADHA	152	2
hsa_circ_BB_0053065.BSJ.1	Homo sapiens	hsa_circ_0053065	HADHA	152	2
hsa_circ_BN_0053063.1	Homo sapiens	hsa_circ_0053063	HADHA	152	2
hsa_circ_BN_0053051.4	Homo sapiens	hsa_circ_0053051	HADHA	152	2
hsa_circ_BN_0053062.1	Homo sapiens	hsa_circ_0053062	HADHA	152	2
hsa-HADHB_BN_0024.1	Homo sapiens	hsa-HADHB_0024	HADHB	153	2
hsa-HADHB_BN_0079.1	Homo sapiens	hsa-HADHB_0079	HADHB	153	2
hsa_circ_BB_0053074.BSJ.1	Homo sapiens	hsa_circ_0053074	HADHB	153	2
TC-hsa-HADHB_BN_0046.1	Homo sapiens	TC-hsa-HADHB_0046	HADHB	153	2
hsa-HADHB_BB_0088.BSJ.1	Homo sapiens	hsa-HADHB_0088	HADHB	153	2
hsa_circ_BB_0053076.BSJ.1	Homo sapiens	hsa_circ_0053076	HADHB	153	2
hsa_circ_BB_0119635.BSJ.1	Homo sapiens	hsa_circ_0119635	HADHB	153	2
hsa_circ_BN_0053072.1	Homo sapiens	hsa_circ_0053072	HADHB	153	2
hsa_circ_BN_0119635.3	Homo sapiens	hsa_circ_0119635	HADHB	153	2
hsa-HADHB_BB_0006.BSJ.1	Homo sapiens	hsa-HADHB_0006	HADHB	153	2
hsa-HADHB_BB_0040.BSJ.1	Homo sapiens	hsa-HADHB_0040	HADHB	153	2
hsa_circ_BB_0053072.BSJ.1	Homo sapiens	hsa_circ_0053072	HADHB	153	2
hsa_circ_BB_0053071.BSJ.1	Homo sapiens	hsa_circ_0053071	HADHB	153	2
hsa_circ_BB_0053070.BSJ.1	Homo sapiens	hsa_circ_0053070	HADHB	153	2
hsa_circ_BB_0053068.BSJ.1	Homo sapiens	hsa_circ_0053068	HADHB	153	2
hsa-HADHB_BB_0056.BSJ.1	Homo sapiens	hsa-HADHB_0056	HADHB	153	2
hsa-HADHB_BB_0068.BSJ.1	Homo sapiens	hsa-HADHB_0068	HADHB	153	2
hsa-HADHB_BB_0071.BSJ.1	Homo sapiens	hsa-HADHB_0071	HADHB	153	2
TC-hsa-HADHB_BN_0045.1	Homo sapiens	TC-hsa-HADHB_0045	HADHB	153	2
TC-hsa-HADHB_BN_0040.1	Homo sapiens	TC-hsa-HADHB_0040	HADHB	153	2
hsa_circ_BB_0053073.BSJ.1	Homo sapiens	hsa_circ_0053073	HADHB	153	2
TC-hsa-HADHB_BN_0033.1	Homo sapiens	TC-hsa-HADHB_0033	HADHB	153	2
mmu-Hadhb_BN_0003.1	Mus musculus	mmu-Hadhb_0003	Hadhb	153	2
mmu-Hadhb_BN_0007.1	Mus musculus	mmu-Hadhb_0007	Hadhb	153	2
mmu-Hadhb_BN_0008.2	Mus musculus	mmu-Hadhb_0008	Hadhb	153	2
SRR13142116_BB_101928gene=Hadhb.BSJ.1	Mus musculus	SRR13142116_101928	Hadhb	153	2
SRR13142116_BB_114108gene=Hadhb.BSJ.1	Mus musculus	SRR13142116_114108	Hadhb	153	2
TC-hsa-HADHB_BN_0004.1	Homo sapiens	TC-hsa-HADHB_0004	HADHB	153	2
TC-hsa-HADHB_BB_0021.BSJ.1	Homo sapiens	TC-hsa-HADHB_0021	HADHB	153	2
TC-hsa-HADHB_BB_0016.BSJ.1	Homo sapiens	TC-hsa-HADHB_0016	HADHB	153	2
TC-hsa-HADHB_BB_0015.BSJ.1	Homo sapiens	TC-hsa-HADHB_0015	HADHB	153	2
TC-hsa-HADHB_BB_0013.BSJ.1	Homo sapiens	TC-hsa-HADHB_0013	HADHB	153	2
TC-hsa-HADHB_BB_0011.BSJ.1	Homo sapiens	TC-hsa-HADHB_0011	HADHB	153	2
TC-hsa-HADHB_BN_0036.1	Homo sapiens	TC-hsa-HADHB_0036	HADHB	153	2
ORF_HADHB_0007_BB_001	Homo sapiens	circ_HADHB_0007	HADHB	153	2
TC-hsa-HADHB_BB_0028.BSJ.1	Homo sapiens	TC-hsa-HADHB_0028	HADHB	153	2
mmu-Hadhb_BB_0009.BSJ.1	Mus musculus	mmu-Hadhb_0009	Hadhb	153	2
TC-hsa-HADHB_BN_0026.1	Homo sapiens	TC-hsa-HADHB_0026	HADHB	153	2
TC-hsa-HADHB_BN_0017.3	Homo sapiens	TC-hsa-HADHB_0017	HADHB	153	2
TC-hsa-HADHB_BN_0016.1	Homo sapiens	TC-hsa-HADHB_0016	HADHB	153	2
TC-hsa-HADHB_BN_0006.3	Homo sapiens	TC-hsa-HADHB_0006	HADHB	153	2
TC-hsa-HADHB_BN_0005.3	Homo sapiens	TC-hsa-HADHB_0005	HADHB	153	2
TC-hsa-HADHB_BN_0005.1	Homo sapiens	TC-hsa-HADHB_0005	HADHB	153	2
mmu-Hadhb_BB_0004.BSJ.1	Mus musculus	mmu-Hadhb_0004	Hadhb	153	2
ORF_HADHB_0002_BN_001	Homo sapiens	circ_HADHB_0002	HADHB	153	2
mmu-Hmgcl_BB_0007.BSJ.1	Mus musculus	mmu-Hmgcl_0007	Hmgcl	159	2
ORF_HMGCL_0002_BN_001	Homo sapiens	circ_HMGCL_0002	HMGCL	159	2
hsa_circ_BB_0045994.BSJ.1	Homo sapiens	hsa_circ_0045994	SGSH	167	2
hsa_circ_BN_0045992.6	Homo sapiens	hsa_circ_0045992	SGSH	167	2
mmu-Sgsh_BN_0001.5	Mus musculus	mmu-Sgsh_0001	Sgsh	167	2
mmu-Sgsh_BN_0001.3	Mus musculus	mmu-Sgsh_0001	Sgsh	167	2
TC-hsa-LIG1_BN_0024.1	Homo sapiens	TC-hsa-LIG1_0024	LIG1	197	2
ORF_LIG1_0001_BN_001	Homo sapiens	circ_LIG1_0001	LIG1	197	2
hsa_circ_BN_0109766.1	Homo sapiens	hsa_circ_0109766	LIG1	197	2
mmu-Lig1_BB_0011.BSJ.1	Mus musculus	mmu-Lig1_0011	Lig1	197	2
mmu-Lpl_BB_0010.BSJ.1	Mus musculus	mmu-Lpl_0010	Lpl	200	2
hsa-LPL_BB_0016.BSJ.1	Homo sapiens	hsa-LPL_0016	LPL	200	2
hsa_circ_BN_0037818.2	Homo sapiens	hsa_circ_0037818	CIITA	207	2
hsa_circ_BN_0037817.2	Homo sapiens	hsa_circ_0037817	CIITA	207	2
hsa_circ_BN_0037819.2	Homo sapiens	hsa_circ_0037819	CIITA	207	2
TC-hsa-CIITA_BN_0009.2	Homo sapiens	TC-hsa-CIITA_0009	CIITA	207	2
TC-hsa-CIITA_BN_0003.3	Homo sapiens	TC-hsa-CIITA_0003	CIITA	207	2
TC-hsa-CIITA_BN_0006.3	Homo sapiens	TC-hsa-CIITA_0006	CIITA	207	2
TC-hsa-CIITA_BN_0008.2	Homo sapiens	TC-hsa-CIITA_0008	CIITA	207	2
mmu-Ciita_BN_0003.3	Mus musculus	mmu-Ciita_0003	Ciita	207	2
hsa_circ_BN_0002381.1	Homo sapiens	hsa_circ_0002381	MLH1	208	2
hsa_circ_BN_0064824.1	Homo sapiens	hsa_circ_0064824	MLH1	208	2
hsa-MLH1_BN_0070.4	Homo sapiens	hsa-MLH1_0070	MLH1	208	2
hsa-MLH1_BB_0066.BSJ.1	Homo sapiens	hsa-MLH1_0066	MLH1	208	2
hsa_circ_BN_0123681.4	Homo sapiens	hsa_circ_0123681	MLH1	208	2
ORF_MLH1_0002_BN_001	Homo sapiens	circ_MLH1_0002	MLH1	208	2
ORF_MLH1_0003_BN_001	Homo sapiens	circ_MLH1_0003	MLH1	208	2
mmu-Mlh1_BN_0005.3	Mus musculus	mmu-Mlh1_0005	Mlh1	208	2
mmu-Mlh1_BN_0009.1	Mus musculus	mmu-Mlh1_0009	Mlh1	208	2
mmu-Mlh1_BN_0009.2	Mus musculus	mmu-Mlh1_0009	Mlh1	208	2
mmu-Mlh1_BN_0009.3	Mus musculus	mmu-Mlh1_0009	Mlh1	208	2
mmu-Mlh1_BN_0009.6	Mus musculus	mmu-Mlh1_0009	Mlh1	208	2
mmu-Mlh1_BN_0013.2	Mus musculus	mmu-Mlh1_0013	Mlh1	208	2
mmu-Mlh1_BN_0013.3	Mus musculus	mmu-Mlh1_0013	Mlh1	208	2
mmu-Mlh1_BN_0018.1	Mus musculus	mmu-Mlh1_0018	Mlh1	208	2
mmu-Mlh1_BN_0018.2	Mus musculus	mmu-Mlh1_0018	Mlh1	208	2
mmu-Mlh1_BN_0019.1	Mus musculus	mmu-Mlh1_0019	Mlh1	208	2
mmu-Mlh1_BN_0019.2	Mus musculus	mmu-Mlh1_0019	Mlh1	208	2
mmu-Mlh1_BN_0019.3	Mus musculus	mmu-Mlh1_0019	Mlh1	208	2
TC-hsa-MLH1_BB_0049.BSJ.1	Homo sapiens	TC-hsa-MLH1_0049	MLH1	208	2
mmu-Mlh1_BN_0013.1	Mus musculus	mmu-Mlh1_0013	Mlh1	208	2
mmu-Mlh1_BB_0020.BSJ.1	Mus musculus	mmu-Mlh1_0020	Mlh1	208	2
TC-hsa-MLH1_BN_0045.1	Homo sapiens	TC-hsa-MLH1_0045	MLH1	208	2
mmu-Mlh1_BB_0016.BSJ.1	Mus musculus	mmu-Mlh1_0016	Mlh1	208	2
mmu-Mlh1_BB_0001.BSJ.1	Mus musculus	mmu-Mlh1_0001	Mlh1	208	2
mmu-Mlh1_BB_0008.BSJ.1	Mus musculus	mmu-Mlh1_0008	Mlh1	208	2
TC-hsa-MLH1_BN_0047.1	Homo sapiens	TC-hsa-MLH1_0047	MLH1	208	2
TC-hsa-MLH1_BN_0056.1	Homo sapiens	TC-hsa-MLH1_0056	MLH1	208	2
mmu-Msh2_BN_0026.4	Mus musculus	mmu-Msh2_0026	Msh2	210	2
mmu-Msh2_BN_0026.3	Mus musculus	mmu-Msh2_0026	Msh2	210	2
mmu-Msh2_BN_0026.2	Mus musculus	mmu-Msh2_0026	Msh2	210	2
mmu-Msh2_BN_0023.2	Mus musculus	mmu-Msh2_0023	Msh2	210	2
mmu-Msh2_BN_0023.1	Mus musculus	mmu-Msh2_0023	Msh2	210	2
mmu-Msh2_BN_0021.1	Mus musculus	mmu-Msh2_0021	Msh2	210	2
mmu-Msh2_BN_0017.1	Mus musculus	mmu-Msh2_0017	Msh2	210	2
mmu-Msh2_BN_0011.4	Mus musculus	mmu-Msh2_0011	Msh2	210	2
mmu-Msh2_BN_0011.3	Mus musculus	mmu-Msh2_0011	Msh2	210	2
mmu-Msh2_BN_0011.2	Mus musculus	mmu-Msh2_0011	Msh2	210	2
mmu-Msh2_BN_0030.1	Mus musculus	mmu-Msh2_0030	Msh2	210	2
mmu-Msh2_BN_0009.1	Mus musculus	mmu-Msh2_0009	Msh2	210	2
mmu-Msh2_BN_0032.1	Mus musculus	mmu-Msh2_0032	Msh2	210	2
TC-hsa-MSH2_BN_0011.2	Homo sapiens	TC-hsa-MSH2_0011	MSH2	210	2
mmu-Msh2_BB_0018.BSJ.1	Mus musculus	mmu-Msh2_0018	Msh2	210	2
mmu-Msh2_BB_0022.BSJ.1	Mus musculus	mmu-Msh2_0022	Msh2	210	2
mmu-Msh2_BN_0005.1	Mus musculus	mmu-Msh2_0005	Msh2	210	2
mmu-Msh2_BN_0007.1	Mus musculus	mmu-Msh2_0007	Msh2	210	2
SRR13142121_BN_11447gene=Msh2.2	Mus musculus	SRR13142121_11447	Msh2	210	2
SRR13142121_BN_11447gene=Msh2.1	Mus musculus	SRR13142121_11447	Msh2	210	2
mmu-Msh2_BN_0034.1	Mus musculus	mmu-Msh2_0034	Msh2	210	2
mmu-Msh2_BN_0008.1	Mus musculus	mmu-Msh2_0008	Msh2	210	2
hsa_circ_BN_0120184.2	Homo sapiens	hsa_circ_0120184	MSH2	210	2
TC-hsa-MSH2_BN_0037.2	Homo sapiens	TC-hsa-MSH2_0037	MSH2	210	2
TC-hsa-MSH2_BN_0048.1	Homo sapiens	TC-hsa-MSH2_0048	MSH2	210	2
TC-hsa-MSH2_BN_0052.2	Homo sapiens	TC-hsa-MSH2_0052	MSH2	210	2
TC-hsa-MSH2_BN_0018.1	Homo sapiens	TC-hsa-MSH2_0018	MSH2	210	2
TC-hsa-MSH2_BN_0015.1	Homo sapiens	TC-hsa-MSH2_0015	MSH2	210	2
TC-hsa-MSH2_BN_0011.3	Homo sapiens	TC-hsa-MSH2_0011	MSH2	210	2
TC-hsa-MSH2_BN_0008.1	Homo sapiens	TC-hsa-MSH2_0008	MSH2	210	2
hsa-MSH2_BN_0087.2	Homo sapiens	hsa-MSH2_0087	MSH2	210	2
hsa-MSH2_BN_0089.1	Homo sapiens	hsa-MSH2_0089	MSH2	210	2
hsa-MSH2_BN_0090.1	Homo sapiens	hsa-MSH2_0090	MSH2	210	2
TC-hsa-MSH2_BN_0037.1	Homo sapiens	TC-hsa-MSH2_0037	MSH2	210	2
TC-hsa-MSH2_BN_0036.1	Homo sapiens	TC-hsa-MSH2_0036	MSH2	210	2
TC-hsa-MSH2_BN_0035.1	Homo sapiens	TC-hsa-MSH2_0035	MSH2	210	2
ORF_MSH2_0003_BN_001	Homo sapiens	circ_MSH2_0003	MSH2	210	2
ORF_MSH2_0003_BN_002	Homo sapiens	circ_MSH2_0003	MSH2	210	2
hsa-MSH2_BN_0083.2	Homo sapiens	hsa-MSH2_0083	MSH2	210	2
TC-hsa-MSH2_BN_0022.2	Homo sapiens	TC-hsa-MSH2_0022	MSH2	210	2
hsa-MSH2_BN_0096.3	Homo sapiens	hsa-MSH2_0096	MSH2	210	2
TC-hsa-MSH2_BN_0022.3	Homo sapiens	TC-hsa-MSH2_0022	MSH2	210	2
TC-hsa-MSH2_BN_0024.1	Homo sapiens	TC-hsa-MSH2_0024	MSH2	210	2
hsa_circ_BN_0006402.1	Homo sapiens	hsa_circ_0006402	MSH2	210	2
hsa_circ_BN_0054469.1	Homo sapiens	hsa_circ_0054469	MSH2	210	2
hsa_circ_BN_0054470.2	Homo sapiens	hsa_circ_0054470	MSH2	210	2
hsa_circ_BN_0054470.3	Homo sapiens	hsa_circ_0054470	MSH2	210	2
hsa_circ_BN_0054471.1	Homo sapiens	hsa_circ_0054471	MSH2	210	2
hsa_circ_BN_0120182.2	Homo sapiens	hsa_circ_0120182	MSH2	210	2
hsa_circ_BN_0120182.3	Homo sapiens	hsa_circ_0120182	MSH2	210	2
TC-hsa-MSH2_BN_0023.1	Homo sapiens	TC-hsa-MSH2_0023	MSH2	210	2
hsa_circ_BN_0120185.3	Homo sapiens	hsa_circ_0120185	MSH2	210	2
hsa-MSH2_BN_0061.1	Homo sapiens	hsa-MSH2_0061	MSH2	210	2
hsa-MSH2_BN_0051.1	Homo sapiens	hsa-MSH2_0051	MSH2	210	2
hsa-MSH2_BN_0046.1	Homo sapiens	hsa-MSH2_0046	MSH2	210	2
hsa-MSH2_BN_0041.4	Homo sapiens	hsa-MSH2_0041	MSH2	210	2
hsa-MSH2_BN_0041.3	Homo sapiens	hsa-MSH2_0041	MSH2	210	2
hsa-MSH2_BN_0023.1	Homo sapiens	hsa-MSH2_0023	MSH2	210	2
hsa-MSH2_BN_0019.1	Homo sapiens	hsa-MSH2_0019	MSH2	210	2
hsa-MSH2_BN_0016.1	Homo sapiens	hsa-MSH2_0016	MSH2	210	2
hsa-MSH2_BN_0008.1	Homo sapiens	hsa-MSH2_0008	MSH2	210	2
TC-hsa-MSH2_BN_0009.1	Homo sapiens	TC-hsa-MSH2_0009	MSH2	210	2
hsa-MSH2_BB_0065.BSJ.1	Homo sapiens	hsa-MSH2_0065	MSH2	210	2
hsa-MSH2_BB_0028.BSJ.1	Homo sapiens	hsa-MSH2_0028	MSH2	210	2
hsa-MSH2_BB_0015.BSJ.1	Homo sapiens	hsa-MSH2_0015	MSH2	210	2
hsa-MSH2_BB_0012.BSJ.1	Homo sapiens	hsa-MSH2_0012	MSH2	210	2
hsa-MSH2_BB_0077.BSJ.1	Homo sapiens	hsa-MSH2_0077	MSH2	210	2
hsa-MSH2_BN_0001.1	Homo sapiens	hsa-MSH2_0001	MSH2	210	2
hsa-MSH2_BN_0002.1	Homo sapiens	hsa-MSH2_0002	MSH2	210	2
hsa-MSH2_BN_0005.1	Homo sapiens	hsa-MSH2_0005	MSH2	210	2
hsa-MSH2_BN_0070.2	Homo sapiens	hsa-MSH2_0070	MSH2	210	2
hsa-MSH2_BN_0080.2	Homo sapiens	hsa-MSH2_0080	MSH2	210	2
hsa-MSH2_BN_0080.3	Homo sapiens	hsa-MSH2_0080	MSH2	210	2
hsa-MSH2_BN_0079.2	Homo sapiens	hsa-MSH2_0079	MSH2	210	2
hsa-MSH2_BN_0077.1	Homo sapiens	hsa-MSH2_0077	MSH2	210	2
hsa_circ_BN_0120186.2	Homo sapiens	hsa_circ_0120186	MSH2	210	2
hsa-MSH2_BN_0070.3	Homo sapiens	hsa-MSH2_0070	MSH2	210	2
hsa-MSH2_BN_0073.1	Homo sapiens	hsa-MSH2_0073	MSH2	210	2
mmu-Mttp_BB_0013.BSJ.1	Mus musculus	mmu-Mttp_0013	Mttp	212	2
mmu-Mttp_BB_0028.BSJ.1	Mus musculus	mmu-Mttp_0028	Mttp	212	2
hsa-MTTP_BB_0015.BSJ.1	Homo sapiens	hsa-MTTP_0015	MTTP	212	2
hsa-MTTP_BB_0006.BSJ.1	Homo sapiens	hsa-MTTP_0006	MTTP	212	2
hsa-NAGLU_BN_0004.2	Homo sapiens	hsa-NAGLU_0004	NAGLU	222	2
hsa-NAGLU_BN_0005.2	Homo sapiens	hsa-NAGLU_0005	NAGLU	222	2
mmu-Naglu_BB_0002.BSJ.1	Mus musculus	mmu-Naglu_0002	Naglu	222	2
TC-hsa-PTCH1_BN_0002.5	Homo sapiens	TC-hsa-PTCH1_0002	PTCH1	223	2
hsa-PTCH1_BB_0011.BSJ.1	Homo sapiens	hsa-PTCH1_0011	PTCH1	223	2
TC-hsa-PTCH1_BN_0006.3	Homo sapiens	TC-hsa-PTCH1_0006	PTCH1	223	2
mmu-Ptch1_BB_0030.BSJ.1	Mus musculus	mmu-Ptch1_0030	Ptch1	223	2
mmu-Ptch1_BN_0002.3	Mus musculus	mmu-Ptch1_0002	Ptch1	223	2
mmu-Ptch1_BN_0002.4	Mus musculus	mmu-Ptch1_0002	Ptch1	223	2
mmu-Ptch1_BN_0004.3	Mus musculus	mmu-Ptch1_0004	Ptch1	223	2
hsa-PTCH1_BB_0009.BSJ.1	Homo sapiens	hsa-PTCH1_0009	PTCH1	223	2
hsa-PTCH1_BB_0007.BSJ.1	Homo sapiens	hsa-PTCH1_0007	PTCH1	223	2
hsa-PTCH1_BB_0004.BSJ.1	Homo sapiens	hsa-PTCH1_0004	PTCH1	223	2
hsa_circ_BB_0139402.BSJ.1	Homo sapiens	hsa_circ_0139402	PTCH1	223	2
TC-hsa-NF1_BN_0103.3	Homo sapiens	TC-hsa-NF1_0103	NF1	226	2
mmu-Nf1_BN_0043.1	Mus musculus	mmu-Nf1_0043	Nf1	226	2
TC-hsa-NF1_BN_0102.3	Homo sapiens	TC-hsa-NF1_0102	NF1	226	2
TC-hsa-NF1_BN_0095.4	Homo sapiens	TC-hsa-NF1_0095	NF1	226	2
TC-hsa-NF1_BN_0094.3	Homo sapiens	TC-hsa-NF1_0094	NF1	226	2
TC-hsa-NF1_BN_0093.3	Homo sapiens	TC-hsa-NF1_0093	NF1	226	2
TC-hsa-NF1_BN_0104.4	Homo sapiens	TC-hsa-NF1_0104	NF1	226	2
TC-hsa-NF1_BN_0177.6	Homo sapiens	TC-hsa-NF1_0177	NF1	226	2
mmu-Nf1_BN_0088.1	Mus musculus	mmu-Nf1_0088	Nf1	226	2
mmu-Nf1_BN_0048.2	Mus musculus	mmu-Nf1_0048	Nf1	226	2
hsa_circ_BN_0042908.11	Homo sapiens	hsa_circ_0042908	NF1	226	2
hsa_circ_BN_0042908.2	Homo sapiens	hsa_circ_0042908	NF1	226	2
mmu-Nf1_BN_0070.1	Mus musculus	mmu-Nf1_0070	Nf1	226	2
mmu-Nf1_BB_0207.BSJ.1	Mus musculus	mmu-Nf1_0207	Nf1	226	2
mmu-Nf1_BN_0037.1	Mus musculus	mmu-Nf1_0037	Nf1	226	2
hsa-NF1_BN_0064.3	Homo sapiens	hsa-NF1_0064	NF1	226	2
hsa-NF1_BN_0067.1	Homo sapiens	hsa-NF1_0067	NF1	226	2
hsa-NF1_BN_0095.3	Homo sapiens	hsa-NF1_0095	NF1	226	2
TC-hsa-NF1_BN_0180.5	Homo sapiens	TC-hsa-NF1_0180	NF1	226	2
TC-hsa-NF1_BN_0186.3	Homo sapiens	TC-hsa-NF1_0186	NF1	226	2
TC-hsa-NF1_BN_0189.3	Homo sapiens	TC-hsa-NF1_0189	NF1	226	2
mmu-Nf1_BB_0126.BSJ.1	Mus musculus	mmu-Nf1_0126	Nf1	226	2
mmu-Nf1_BN_0008.1	Mus musculus	mmu-Nf1_0008	Nf1	226	2
mmu-Nf1_BN_0007.2	Mus musculus	mmu-Nf1_0007	Nf1	226	2
mmu-Nf1_BB_0199.BSJ.1	Mus musculus	mmu-Nf1_0199	Nf1	226	2
mmu-Nf1_BB_0151.BSJ.1	Mus musculus	mmu-Nf1_0151	Nf1	226	2
mmu-Nf1_BB_0150.BSJ.1	Mus musculus	mmu-Nf1_0150	Nf1	226	2
mmu-Nf1_BN_0100.1	Mus musculus	mmu-Nf1_0100	Nf1	226	2
hsa_circ_BN_0042907.1	Homo sapiens	hsa_circ_0042907	NF1	226	2
SRR13142117_BN_2704gene=Nf1.1	Mus musculus	SRR13142117_2704	Nf1	226	2
mmu-Nf1_BN_0204.3	Mus musculus	mmu-Nf1_0204	Nf1	226	2
mmu-Nf1_BN_0194.1	Mus musculus	mmu-Nf1_0194	Nf1	226	2
hsa_circ_BN_0042906.7	Homo sapiens	hsa_circ_0042906	NF1	226	2
mmu-Nf1_BN_0181.1	Mus musculus	mmu-Nf1_0181	Nf1	226	2
mmu-Nf1_BN_0168.2	Mus musculus	mmu-Nf1_0168	Nf1	226	2
mmu-Nf1_BN_0143.4	Mus musculus	mmu-Nf1_0143	Nf1	226	2
mmu-Nf1_BN_0183.1	Mus musculus	mmu-Nf1_0183	Nf1	226	2
hsa_circ_BN_0042905.9	Homo sapiens	hsa_circ_0042905	NF1	226	2
hsa_circ_BN_0042893.1	Homo sapiens	hsa_circ_0042893	NF1	226	2
hsa_circ_BN_0042893.10	Homo sapiens	hsa_circ_0042893	NF1	226	2
hsa_circ_BN_0042896.14	Homo sapiens	hsa_circ_0042896	NF1	226	2
hsa_circ_BN_0042896.5	Homo sapiens	hsa_circ_0042896	NF1	226	2
hsa_circ_BN_0042898.1	Homo sapiens	hsa_circ_0042898	NF1	226	2
hsa_circ_BN_0042898.10	Homo sapiens	hsa_circ_0042898	NF1	226	2
hsa_circ_BN_0042900.1	Homo sapiens	hsa_circ_0042900	NF1	226	2
hsa_circ_BN_0042900.10	Homo sapiens	hsa_circ_0042900	NF1	226	2
hsa_circ_BN_0042903.4	Homo sapiens	hsa_circ_0042903	NF1	226	2
mmu-Nf1_BN_0136.3	Mus musculus	mmu-Nf1_0136	Nf1	226	2
TC-hsa-NF1_BN_0190.5	Homo sapiens	TC-hsa-NF1_0190	NF1	226	2
hsa-NF1_BN_0134.1	Homo sapiens	hsa-NF1_0134	NF1	226	2
TC-hsa-NF1_BN_0164.3	Homo sapiens	TC-hsa-NF1_0164	NF1	226	2
TC-hsa-NF1_BN_0165.6	Homo sapiens	TC-hsa-NF1_0165	NF1	226	2
TC-hsa-NF1_BN_0176.3	Homo sapiens	TC-hsa-NF1_0176	NF1	226	2
TC-hsa-NF1_BN_0136.3	Homo sapiens	TC-hsa-NF1_0136	NF1	226	2
TC-hsa-NF1_BN_0137.4	Homo sapiens	TC-hsa-NF1_0137	NF1	226	2
TC-hsa-NF1_BN_0138.4	Homo sapiens	TC-hsa-NF1_0138	NF1	226	2
TC-hsa-NF1_BN_0163.1	Homo sapiens	TC-hsa-NF1_0163	NF1	226	2
hsa_circ_BN_0042907.10	Homo sapiens	hsa_circ_0042907	NF1	226	2
mmu-Nf1_BN_0132.2	Mus musculus	mmu-Nf1_0132	Nf1	226	2
mmu-Nf1_BN_0130.1	Mus musculus	mmu-Nf1_0130	Nf1	226	2
mmu-Nf1_BN_0120.2	Mus musculus	mmu-Nf1_0120	Nf1	226	2
mmu-Nf1_BN_0117.1	Mus musculus	mmu-Nf1_0117	Nf1	226	2
mmu-Nf1_BN_0108.1	Mus musculus	mmu-Nf1_0108	Nf1	226	2
hsa-NF1_BN_0196.4	Homo sapiens	hsa-NF1_0196	NF1	226	2
hsa-NF1_BN_0195.1	Homo sapiens	hsa-NF1_0195	NF1	226	2
mmu_circ_BN_0003420.6	Mus musculus	mmu_circ_0003420	Nf1	226	2
TC-hsa-NF1_BN_0193.6	Homo sapiens	TC-hsa-NF1_0193	NF1	226	2
hsa_circ_BN_0106549.3	Homo sapiens	hsa_circ_0106549	NF1	226	2
hsa_circ_BN_0042919.6	Homo sapiens	hsa_circ_0042919	NF1	226	2
hsa_circ_BN_0042920.1	Homo sapiens	hsa_circ_0042920	NF1	226	2
hsa_circ_BN_0042923.2	Homo sapiens	hsa_circ_0042923	NF1	226	2
hsa_circ_BN_0042927.1	Homo sapiens	hsa_circ_0042927	NF1	226	2
hsa_circ_BN_0042929.1	Homo sapiens	hsa_circ_0042929	NF1	226	2
hsa_circ_BN_0042931.5	Homo sapiens	hsa_circ_0042931	NF1	226	2
hsa_circ_BN_0042928.5	Homo sapiens	hsa_circ_0042928	NF1	226	2
hsa_circ_BN_0106561.3	Homo sapiens	hsa_circ_0106561	NF1	226	2
mmu_circ_BN_0003413.1	Mus musculus	mmu_circ_0003413	Nf1	226	2
mmu_circ_BN_0003415.1	Mus musculus	mmu_circ_0003415	Nf1	226	2
mmu_circ_BN_0003417.6	Mus musculus	mmu_circ_0003417	Nf1	226	2
mmu_circ_BN_0003419.6	Mus musculus	mmu_circ_0003419	Nf1	226	2
mmu_circ_BN_0003421.1	Mus musculus	mmu_circ_0003421	Nf1	226	2
TC-hsa-NF1_BN_0105.3	Homo sapiens	TC-hsa-NF1_0105	NF1	226	2
TC-hsa-NF1_BN_0106.3	Homo sapiens	TC-hsa-NF1_0106	NF1	226	2
TC-hsa-NF1_BN_0107.4	Homo sapiens	TC-hsa-NF1_0107	NF1	226	2
TC-hsa-NF1_BN_0108.4	Homo sapiens	TC-hsa-NF1_0108	NF1	226	2
TC-hsa-NF1_BN_0112.3	Homo sapiens	TC-hsa-NF1_0112	NF1	226	2
mmu-Nf1_BB_0053.BSJ.1	Mus musculus	mmu-Nf1_0053	Nf1	226	2
mmu-Nf1_BB_0034.BSJ.1	Mus musculus	mmu-Nf1_0034	Nf1	226	2
mmu-Nf1_BB_0033.BSJ.1	Mus musculus	mmu-Nf1_0033	Nf1	226	2
mmu-Nf1_BB_0026.BSJ.1	Mus musculus	mmu-Nf1_0026	Nf1	226	2
mmu-Nf1_BB_0007.BSJ.1	Mus musculus	mmu-Nf1_0007	Nf1	226	2
TC-hsa-NF1_BN_0196.4	Homo sapiens	TC-hsa-NF1_0196	NF1	226	2
TC-hsa-NF1_BN_0197.5	Homo sapiens	TC-hsa-NF1_0197	NF1	226	2
TC-hsa-NF1_BN_0198.3	Homo sapiens	TC-hsa-NF1_0198	NF1	226	2
hsa_circ_BN_0042910.1	Homo sapiens	hsa_circ_0042910	NF1	226	2
TC-hsa-NF1_BN_0132.3	Homo sapiens	TC-hsa-NF1_0132	NF1	226	2
hsa_circ_BN_0042917.1	Homo sapiens	hsa_circ_0042917	NF1	226	2
TC-hsa-NF1_BN_0130.3	Homo sapiens	TC-hsa-NF1_0130	NF1	226	2
TC-hsa-NF1_BN_0129.3	Homo sapiens	TC-hsa-NF1_0129	NF1	226	2
TC-hsa-NF1_BN_0126.6	Homo sapiens	TC-hsa-NF1_0126	NF1	226	2
TC-hsa-NF1_BN_0125.4	Homo sapiens	TC-hsa-NF1_0125	NF1	226	2
TC-hsa-NF1_BN_0124.3	Homo sapiens	TC-hsa-NF1_0124	NF1	226	2
TC-hsa-NF1_BN_0123.4	Homo sapiens	TC-hsa-NF1_0123	NF1	226	2
TC-hsa-NF1_BN_0134.3	Homo sapiens	TC-hsa-NF1_0134	NF1	226	2
TC-hsa-NF1_BN_0120.4	Homo sapiens	TC-hsa-NF1_0120	NF1	226	2
TC-hsa-NF1_BN_0118.3	Homo sapiens	TC-hsa-NF1_0118	NF1	226	2
TC-hsa-NF1_BN_0116.4	Homo sapiens	TC-hsa-NF1_0116	NF1	226	2
TC-hsa-NF1_BN_0115.4	Homo sapiens	TC-hsa-NF1_0115	NF1	226	2
TC-hsa-NF1_BN_0114.4	Homo sapiens	TC-hsa-NF1_0114	NF1	226	2
TC-hsa-NF1_BN_0113.3	Homo sapiens	TC-hsa-NF1_0113	NF1	226	2
hsa_circ_BN_0042917.10	Homo sapiens	hsa_circ_0042917	NF1	226	2
hsa_circ_BN_0042918.3	Homo sapiens	hsa_circ_0042918	NF1	226	2
TC-hsa-NF1_BN_0121.5	Homo sapiens	TC-hsa-NF1_0121	NF1	226	2
hsa_circ_BN_0042890.3	Homo sapiens	hsa_circ_0042890	NF1	226	2
TC-hsa-NF1_BN_0135.3	Homo sapiens	TC-hsa-NF1_0135	NF1	226	2
hsa_circ_BN_0042910.10	Homo sapiens	hsa_circ_0042910	NF1	226	2
hsa_circ_BN_0042911.14	Homo sapiens	hsa_circ_0042911	NF1	226	2
hsa_circ_BN_0042911.5	Homo sapiens	hsa_circ_0042911	NF1	226	2
hsa_circ_BN_0042912.11	Homo sapiens	hsa_circ_0042912	NF1	226	2
hsa_circ_BN_0042912.2	Homo sapiens	hsa_circ_0042912	NF1	226	2
hsa_circ_BN_0042914.4	Homo sapiens	hsa_circ_0042914	NF1	226	2
hsa_circ_BN_0042915.9	Homo sapiens	hsa_circ_0042915	NF1	226	2
hsa_circ_BN_0042916.11	Homo sapiens	hsa_circ_0042916	NF1	226	2
hsa_circ_BN_0042916.2	Homo sapiens	hsa_circ_0042916	NF1	226	2
mmu-Nf1_BN_0180.1	Mus musculus	mmu-Nf1_0180	Nf1	226	2
hsa_circ_BN_0042886.2	Homo sapiens	hsa_circ_0042886	NF1	226	2
TC-hsa-NF1_BN_0001.4	Homo sapiens	TC-hsa-NF1_0001	NF1	226	2
TC-hsa-NF1_BB_0206.BSJ.1	Homo sapiens	TC-hsa-NF1_0206	NF1	226	2
ORF_NF1_0008_BB_001	Homo sapiens	circ_NF1_0008	NF1	226	2
ORF_NF1_0005_BN_001	Homo sapiens	circ_NF1_0005	NF1	226	2
ORF_NF1_0005_BB_001	Homo sapiens	circ_NF1_0005	NF1	226	2
ORF_NF1_0004_BN_001	Homo sapiens	circ_NF1_0004	NF1	226	2
ORF_NF1_0004_BB_001	Homo sapiens	circ_NF1_0004	NF1	226	2
ORF_NF1_0001_BN_001	Homo sapiens	circ_NF1_0001	NF1	226	2
ORF_NF1_0001_BB_001	Homo sapiens	circ_NF1_0001	NF1	226	2
hsa-NF1_BN_0437.1	Homo sapiens	hsa-NF1_0437	NF1	226	2
hsa-NF1_BN_0393.3	Homo sapiens	hsa-NF1_0393	NF1	226	2
hsa-NF1_BN_0392.3	Homo sapiens	hsa-NF1_0392	NF1	226	2
hsa-NF1_BN_0388.5	Homo sapiens	hsa-NF1_0388	NF1	226	2
hsa-NF1_BN_0388.1	Homo sapiens	hsa-NF1_0388	NF1	226	2
hsa-NF1_BN_0379.3	Homo sapiens	hsa-NF1_0379	NF1	226	2
hsa-NF1_BN_0223.3	Homo sapiens	hsa-NF1_0223	NF1	226	2
TC-hsa-NF1_BN_0063.12	Homo sapiens	TC-hsa-NF1_0063	NF1	226	2
TC-hsa-NF1_BN_0062.4	Homo sapiens	TC-hsa-NF1_0062	NF1	226	2
TC-hsa-NF1_BN_0070.3	Homo sapiens	TC-hsa-NF1_0070	NF1	226	2
TC-hsa-NF1_BN_0079.4	Homo sapiens	TC-hsa-NF1_0079	NF1	226	2
TC-hsa-NF1_BN_0083.3	Homo sapiens	TC-hsa-NF1_0083	NF1	226	2
TC-hsa-NF1_BN_0084.3	Homo sapiens	TC-hsa-NF1_0084	NF1	226	2
TC-hsa-NF1_BN_0088.4	Homo sapiens	TC-hsa-NF1_0088	NF1	226	2
TC-hsa-NF1_BN_0089.4	Homo sapiens	TC-hsa-NF1_0089	NF1	226	2
TC-hsa-NF1_BN_0049.3	Homo sapiens	TC-hsa-NF1_0049	NF1	226	2
TC-hsa-NF1_BN_0048.3	Homo sapiens	TC-hsa-NF1_0048	NF1	226	2
TC-hsa-NF1_BN_0033.4	Homo sapiens	TC-hsa-NF1_0033	NF1	226	2
TC-hsa-NF1_BN_0032.3	Homo sapiens	TC-hsa-NF1_0032	NF1	226	2
TC-hsa-NF1_BN_0092.3	Homo sapiens	TC-hsa-NF1_0092	NF1	226	2
TC-hsa-NF1_BN_0068.3	Homo sapiens	TC-hsa-NF1_0068	NF1	226	2
hsa_circ_BN_0106574.5	Homo sapiens	hsa_circ_0106574	NF1	226	2
hsa_circ_BN_0106575.5	Homo sapiens	hsa_circ_0106575	NF1	226	2
hsa-NF1_BB_0274.BSJ.1	Homo sapiens	hsa-NF1_0274	NF1	226	2
hsa-NF1_BB_0342.BSJ.1	Homo sapiens	hsa-NF1_0342	NF1	226	2
hsa_circ_BN_0106573.3	Homo sapiens	hsa_circ_0106573	NF1	226	2
hsa-NF1_BN_0333.4	Homo sapiens	hsa-NF1_0333	NF1	226	2
hsa-NF1_BN_0362.1	Homo sapiens	hsa-NF1_0362	NF1	226	2
hsa_circ_BN_0106562.3	Homo sapiens	hsa_circ_0106562	NF1	226	2
hsa_circ_BN_0106563.4	Homo sapiens	hsa_circ_0106563	NF1	226	2
hsa-NF1_BN_0038.3	Homo sapiens	hsa-NF1_0038	NF1	226	2
TC-hsa-NF1_BN_0063.3	Homo sapiens	TC-hsa-NF1_0063	NF1	226	2
hsa_circ_BB_0042881.BSJ.1	Homo sapiens	hsa_circ_0042881	NF1	226	2
hsa_circ_BB_0042882.BSJ.1	Homo sapiens	hsa_circ_0042882	NF1	226	2
hsa_circ_BB_0042890.BSJ.1	Homo sapiens	hsa_circ_0042890	NF1	226	2
hsa_circ_BN_0042878.1	Homo sapiens	hsa_circ_0042878	NF1	226	2
hsa_circ_BN_0042878.10	Homo sapiens	hsa_circ_0042878	NF1	226	2
hsa_circ_BN_0047172.2	Homo sapiens	hsa_circ_0047172	NPC1	228	2
mmu-Npc1_BB_0010.BSJ.1	Mus musculus	mmu-Npc1_0010	Npc1	228	2
mmu-Npc1_BN_0003.1	Mus musculus	mmu-Npc1_0003	Npc1	228	2
mmu-Npc1_BN_0001.1	Mus musculus	mmu-Npc1_0001	Npc1	228	2
mmu-Npc1_BN_0009.1	Mus musculus	mmu-Npc1_0009	Npc1	228	2
hsa-NPC1_BN_0023.1	Homo sapiens	hsa-NPC1_0023	NPC1	228	2
hsa-NPC1_BN_0009.1	Homo sapiens	hsa-NPC1_0009	NPC1	228	2
hsa-NPC1_BB_0037.BSJ.1	Homo sapiens	hsa-NPC1_0037	NPC1	228	2
hsa-NPC1_BB_0028.BSJ.1	Homo sapiens	hsa-NPC1_0028	NPC1	228	2
hsa_circ_BN_0047180.1	Homo sapiens	hsa_circ_0047180	NPC1	228	2
hsa_circ_BN_0047179.1	Homo sapiens	hsa_circ_0047179	NPC1	228	2
hsa_circ_BN_0047178.2	Homo sapiens	hsa_circ_0047178	NPC1	228	2
hsa_circ_BN_0047174.5	Homo sapiens	hsa_circ_0047174	NPC1	228	2
hsa_circ_BN_0047174.2	Homo sapiens	hsa_circ_0047174	NPC1	228	2
hsa_circ_BN_0047173.5	Homo sapiens	hsa_circ_0047173	NPC1	228	2
hsa_circ_BN_0047173.2	Homo sapiens	hsa_circ_0047173	NPC1	228	2
hsa_circ_BN_0047172.5	Homo sapiens	hsa_circ_0047172	NPC1	228	2
hsa_circ_BN_0047181.1	Homo sapiens	hsa_circ_0047181	NPC1	228	2
hsa_circ_BN_0047171.2	Homo sapiens	hsa_circ_0047171	NPC1	228	2
hsa-NPC1_BN_0057.1	Homo sapiens	hsa-NPC1_0057	NPC1	228	2
mmu-Npc1_BB_0009.BSJ.1	Mus musculus	mmu-Npc1_0009	Npc1	228	2
hsa-NPC1_BN_0051.2	Homo sapiens	hsa-NPC1_0051	NPC1	228	2
hsa_circ_BB_0047180.BSJ.1	Homo sapiens	hsa_circ_0047180	NPC1	228	2
hsa_circ_BB_0047179.BSJ.1	Homo sapiens	hsa_circ_0047179	NPC1	228	2
hsa_circ_BB_0047177.BSJ.1	Homo sapiens	hsa_circ_0047177	NPC1	228	2
hsa-NPC1_BN_0049.2	Homo sapiens	hsa-NPC1_0049	NPC1	228	2
hsa_circ_BN_0047170.2	Homo sapiens	hsa_circ_0047170	NPC1	228	2
TC-hsa-NPC1_BN_0017.1	Homo sapiens	TC-hsa-NPC1_0017	NPC1	228	2
TC-hsa-NPC1_BN_0014.1	Homo sapiens	TC-hsa-NPC1_0014	NPC1	228	2
TC-hsa-NPC1_BN_0013.1	Homo sapiens	TC-hsa-NPC1_0013	NPC1	228	2
TC-hsa-NPC1_BN_0009.2	Homo sapiens	TC-hsa-NPC1_0009	NPC1	228	2
hsa_circ_BN_0047163.5	Homo sapiens	hsa_circ_0047163	NPC1	228	2
hsa_circ_BN_0047169.2	Homo sapiens	hsa_circ_0047169	NPC1	228	2
hsa_circ_BN_0047165.5	Homo sapiens	hsa_circ_0047165	NPC1	228	2
hsa-NPC1_BN_0057.4	Homo sapiens	hsa-NPC1_0057	NPC1	228	2
hsa-NPC1_BN_0058.2	Homo sapiens	hsa-NPC1_0058	NPC1	228	2
hsa_circ_BN_0047167.2	Homo sapiens	hsa_circ_0047167	NPC1	228	2
TC-hsa-NPC1_BN_0005.2	Homo sapiens	TC-hsa-NPC1_0005	NPC1	228	2
hsa_circ_BN_0047165.2	Homo sapiens	hsa_circ_0047165	NPC1	228	2
TC-hsa-OAT_BN_0005.1	Homo sapiens	TC-hsa-OAT_0005	OAT	231	2
hsa-OAT_BN_0003.1	Homo sapiens	hsa-OAT_0003	OAT	231	2
hsa_circ_BN_0093032.1	Homo sapiens	hsa_circ_0093032	OAT	231	2
hsa_circ_BN_0008898.1	Homo sapiens	hsa_circ_0008898	OAT	231	2
hsa_circ_BN_0002676.1	Homo sapiens	hsa_circ_0002676	OAT	231	2
hsa-OAT_BN_0009.1	Homo sapiens	hsa-OAT_0009	OAT	231	2
ORF_OAT_0001_BN_001	Homo sapiens	circ_OAT_0001	OAT	231	2
hsa-OAT_BN_0027.1	Homo sapiens	hsa-OAT_0027	OAT	231	2
hsa-OAT_BN_0021.1	Homo sapiens	hsa-OAT_0021	OAT	231	2
hsa-OAT_BN_0011.2	Homo sapiens	hsa-OAT_0011	OAT	231	2
mmu-Oat_BN_0005.1	Mus musculus	mmu-Oat_0005	Oat	231	2
TC-hsa-OAT_BN_0010.1	Homo sapiens	TC-hsa-OAT_0010	OAT	231	2
mmu-Oat_BN_0004.1	Mus musculus	mmu-Oat_0004	Oat	231	2
TC-hsa-OAT_BN_0007.1	Homo sapiens	TC-hsa-OAT_0007	OAT	231	2
TC-hsa-OAT_BN_0013.1	Homo sapiens	TC-hsa-OAT_0013	OAT	231	2
mmu-Oat_BN_0010.1	Mus musculus	mmu-Oat_0010	Oat	231	2
hsa_circ_BN_0139766.3	Homo sapiens	hsa_circ_0139766	OCRL	233	2
TC-hsa-OCRL_BN_0005.3	Homo sapiens	TC-hsa-OCRL_0005	OCRL	233	2
TC-hsa-OCRL_BN_0005.2	Homo sapiens	TC-hsa-OCRL_0005	OCRL	233	2
TC-hsa-OCRL_BN_0004.3	Homo sapiens	TC-hsa-OCRL_0004	OCRL	233	2
TC-hsa-OCRL_BN_0004.2	Homo sapiens	TC-hsa-OCRL_0004	OCRL	233	2
TC-hsa-OCRL_BN_0003.2	Homo sapiens	TC-hsa-OCRL_0003	OCRL	233	2
hsa_circ_BN_0139765.2	Homo sapiens	hsa_circ_0139765	OCRL	233	2
TC-hsa-OCRL_BN_0006.3	Homo sapiens	TC-hsa-OCRL_0006	OCRL	233	2
hsa_circ_BN_0139766.2	Homo sapiens	hsa_circ_0139766	OCRL	233	2
hsa_circ_BN_0091488.4	Homo sapiens	hsa_circ_0091488	OCRL	233	2
TC-hsa-OCRL_BN_0006.4	Homo sapiens	TC-hsa-OCRL_0006	OCRL	233	2
TC-hsa-OCRL_BN_0007.4	Homo sapiens	TC-hsa-OCRL_0007	OCRL	233	2
hsa_circ_BN_0139768.2	Homo sapiens	hsa_circ_0139768	OCRL	233	2
TC-hsa-OCRL_BN_0008.2	Homo sapiens	TC-hsa-OCRL_0008	OCRL	233	2
TC-hsa-OCRL_BN_0014.1	Homo sapiens	TC-hsa-OCRL_0014	OCRL	233	2
TC-hsa-OCRL_BN_0016.4	Homo sapiens	TC-hsa-OCRL_0016	OCRL	233	2
TC-hsa-OCRL_BN_0025.3	Homo sapiens	TC-hsa-OCRL_0025	OCRL	233	2
TC-hsa-OCRL_BN_0026.4	Homo sapiens	TC-hsa-OCRL_0026	OCRL	233	2
TC-hsa-OCRL_BN_0028.4	Homo sapiens	TC-hsa-OCRL_0028	OCRL	233	2
hsa_circ_BN_0091483.5	Homo sapiens	hsa_circ_0091483	OCRL	233	2
TC-hsa-OCRL_BN_0007.5	Homo sapiens	TC-hsa-OCRL_0007	OCRL	233	2
hsa_circ_BN_0139769.2	Homo sapiens	hsa_circ_0139769	OCRL	233	2
TC-hsa-OCRL_BB_0035.BSJ.1	Homo sapiens	TC-hsa-OCRL_0035	OCRL	233	2
TC-hsa-OCRL_BN_0002.4	Homo sapiens	TC-hsa-OCRL_0002	OCRL	233	2
TC-hsa-OCRL_BN_0002.5	Homo sapiens	TC-hsa-OCRL_0002	OCRL	233	2
hsa_circ_BN_0091484.5	Homo sapiens	hsa_circ_0091484	OCRL	233	2
hsa_circ_BN_0091485.5	Homo sapiens	hsa_circ_0091485	OCRL	233	2
hsa_circ_BN_0091486.4	Homo sapiens	hsa_circ_0091486	OCRL	233	2
hsa_circ_BN_0091483.4	Homo sapiens	hsa_circ_0091483	OCRL	233	2
hsa_circ_BN_0091482.2	Homo sapiens	hsa_circ_0091482	OCRL	233	2
hsa_circ_BN_0091482.1	Homo sapiens	hsa_circ_0091482	OCRL	233	2
hsa_circ_BN_0091486.5	Homo sapiens	hsa_circ_0091486	OCRL	233	2
hsa_circ_BN_0091487.4	Homo sapiens	hsa_circ_0091487	OCRL	233	2
hsa_circ_BN_0091485.4	Homo sapiens	hsa_circ_0091485	OCRL	233	2
hsa_circ_BN_0091484.4	Homo sapiens	hsa_circ_0091484	OCRL	233	2
hsa-OCRL_BB_0036.BSJ.1	Homo sapiens	hsa-OCRL_0036	OCRL	233	2
hsa-OCRL_BB_0072.BSJ.1	Homo sapiens	hsa-OCRL_0072	OCRL	233	2
hsa-OCRL_BN_0029.1	Homo sapiens	hsa-OCRL_0029	OCRL	233	2
hsa-OCRL_BN_0033.2	Homo sapiens	hsa-OCRL_0033	OCRL	233	2
hsa-OCRL_BN_0040.2	Homo sapiens	hsa-OCRL_0040	OCRL	233	2
hsa_circ_BN_0139770.4	Homo sapiens	hsa_circ_0139770	OCRL	233	2
hsa_circ_BN_0091490.2	Homo sapiens	hsa_circ_0091490	OCRL	233	2
mmu-Ocrl_BN_0003.2	Mus musculus	mmu-Ocrl_0003	Ocrl	233	2
mmu_circ_BN_0016285.3	Mus musculus	mmu_circ_0016285	Ocrl	233	2
mmu_circ_BN_0016285.4	Mus musculus	mmu_circ_0016285	Ocrl	233	2
mmu-Ocrl_BB_0017.BSJ.1	Mus musculus	mmu-Ocrl_0017	Ocrl	233	2
mmu-Ocrl_BN_0001.1	Mus musculus	mmu-Ocrl_0001	Ocrl	233	2
mmu-Ocrl_BN_0003.1	Mus musculus	mmu-Ocrl_0003	Ocrl	233	2
mmu-Ocrl_BN_0016.1	Mus musculus	mmu-Ocrl_0016	Ocrl	233	2
mmu-Ocrl_BN_0025.1	Mus musculus	mmu-Ocrl_0025	Ocrl	233	2
SRR13142116_BN_18784gene=Ocrl.3	Mus musculus	SRR13142116_18784	Ocrl	233	2
SRR13142116_BN_18784gene=Ocrl.4	Mus musculus	SRR13142116_18784	Ocrl	233	2
mmu-Pah_BN_0012.1	Mus musculus	mmu-Pah_0012	Pah	234	2
mmu-Pah_BN_0011.1	Mus musculus	mmu-Pah_0011	Pah	234	2
mmu-Pah_BN_0009.1	Mus musculus	mmu-Pah_0009	Pah	234	2
mmu-Pah_BN_0007.2	Mus musculus	mmu-Pah_0007	Pah	234	2
mmu-Pah_BN_0007.1	Mus musculus	mmu-Pah_0007	Pah	234	2
mmu-Pah_BN_0005.1	Mus musculus	mmu-Pah_0005	Pah	234	2
mmu-Pah_BN_0004.1	Mus musculus	mmu-Pah_0004	Pah	234	2
mmu-Pah_BN_0003.2	Mus musculus	mmu-Pah_0003	Pah	234	2
mmu-Pah_BN_0002.1	Mus musculus	mmu-Pah_0002	Pah	234	2
mmu-Pah_BN_0001.1	Mus musculus	mmu-Pah_0001	Pah	234	2
mmu-Pah_BB_0008.BSJ.1	Mus musculus	mmu-Pah_0008	Pah	234	2
mmu-Pah_BN_0013.1	Mus musculus	mmu-Pah_0013	Pah	234	2
hsa_circ_BB_0027926.BSJ.1	Homo sapiens	hsa_circ_0027926	PAH	234	2
hsa-PAH_BB_0002.BSJ.1	Homo sapiens	hsa-PAH_0002	PAH	234	2
hsa-PAH_BB_0070.BSJ.1	Homo sapiens	hsa-PAH_0070	PAH	234	2
hsa-PAH_BB_0026.BSJ.1	Homo sapiens	hsa-PAH_0026	PAH	234	2
hsa_circ_BN_0099733.2	Homo sapiens	hsa_circ_0099733	PCCA	236	2
SRR13142121_BB_994gene=Pcca.BSJ.1	Mus musculus	SRR13142121_994	Pcca	236	2
mmu-Pcca_BN_0001.1	Mus musculus	mmu-Pcca_0001	Pcca	236	2
hsa_circ_BB_0030744.BSJ.1	Homo sapiens	hsa_circ_0030744	PCCA	236	2
ORF_PCCA_0015_BB_001	Homo sapiens	circ_PCCA_0015	PCCA	236	2
ORF_PCCA_0013_BN_001	Homo sapiens	circ_PCCA_0013	PCCA	236	2
ORF_PCCA_0011_BN_001	Homo sapiens	circ_PCCA_0011	PCCA	236	2
ORF_PCCA_0007_BN_002	Homo sapiens	circ_PCCA_0007	PCCA	236	2
mmu-Pcca_BN_0001.2	Mus musculus	mmu-Pcca_0001	Pcca	236	2
ORF_PCCA_0002_BN_001	Homo sapiens	circ_PCCA_0002	PCCA	236	2
ORF_PCCA_0001_BN_002	Homo sapiens	circ_PCCA_0001	PCCA	236	2
mmu-Pcca_BN_0151.1	Mus musculus	mmu-Pcca_0151	Pcca	236	2
mmu-Pcca_BN_0148.1	Mus musculus	mmu-Pcca_0148	Pcca	236	2
mmu-Pcca_BN_0146.2	Mus musculus	mmu-Pcca_0146	Pcca	236	2
mmu-Pcca_BN_0145.1	Mus musculus	mmu-Pcca_0145	Pcca	236	2
mmu-Pcca_BN_0143.4	Mus musculus	mmu-Pcca_0143	Pcca	236	2
hsa-PCCA_BB_0262.BSJ.1	Homo sapiens	hsa-PCCA_0262	PCCA	236	2
hsa-PCCA_BB_0009.BSJ.1	Homo sapiens	hsa-PCCA_0009	PCCA	236	2
hsa-PCCA_BN_0125.1	Homo sapiens	hsa-PCCA_0125	PCCA	236	2
ORF_PCCA_0026_BN_002	Homo sapiens	circ_PCCA_0026	PCCA	236	2
hsa_circ_BN_0030744.3	Homo sapiens	hsa_circ_0030744	PCCA	236	2
ORF_PCCA_0029_BB_001	Homo sapiens	circ_PCCA_0029	PCCA	236	2
mmu-Pcca_BN_0116.2	Mus musculus	mmu-Pcca_0116	Pcca	236	2
mmu-Pcca_BN_0132.1	Mus musculus	mmu-Pcca_0132	Pcca	236	2
mmu-Pcca_BN_0033.2	Mus musculus	mmu-Pcca_0033	Pcca	236	2
mmu-Pcca_BN_0032.4	Mus musculus	mmu-Pcca_0032	Pcca	236	2
mmu-Pcca_BN_0031.1	Mus musculus	mmu-Pcca_0031	Pcca	236	2
mmu-Pcca_BN_0030.1	Mus musculus	mmu-Pcca_0030	Pcca	236	2
mmu-Pcca_BN_0026.2	Mus musculus	mmu-Pcca_0026	Pcca	236	2
mmu-Pcca_BN_0025.1	Mus musculus	mmu-Pcca_0025	Pcca	236	2
mmu-Pcca_BN_0023.3	Mus musculus	mmu-Pcca_0023	Pcca	236	2
mmu-Pcca_BN_0023.2	Mus musculus	mmu-Pcca_0023	Pcca	236	2
mmu-Pcca_BN_0017.2	Mus musculus	mmu-Pcca_0017	Pcca	236	2
mmu-Pcca_BN_0017.1	Mus musculus	mmu-Pcca_0017	Pcca	236	2
mmu-Pcca_BN_0047.2	Mus musculus	mmu-Pcca_0047	Pcca	236	2
mmu-Pcca_BN_0048.1	Mus musculus	mmu-Pcca_0048	Pcca	236	2
mmu-Pcca_BN_0051.3	Mus musculus	mmu-Pcca_0051	Pcca	236	2
mmu-Pcca_BN_0052.3	Mus musculus	mmu-Pcca_0052	Pcca	236	2
mmu-Pcca_BN_0026.1	Mus musculus	mmu-Pcca_0026	Pcca	236	2
mmu-Pcca_BN_0113.2	Mus musculus	mmu-Pcca_0113	Pcca	236	2
mmu-Pcca_BN_0111.1	Mus musculus	mmu-Pcca_0111	Pcca	236	2
mmu-Pcca_BN_0045.2	Mus musculus	mmu-Pcca_0045	Pcca	236	2
mmu-Pcca_BN_0045.1	Mus musculus	mmu-Pcca_0045	Pcca	236	2
mmu-Pcca_BN_0041.2	Mus musculus	mmu-Pcca_0041	Pcca	236	2
mmu-Pcca_BN_0040.1	Mus musculus	mmu-Pcca_0040	Pcca	236	2
mmu-Pcca_BN_0037.3	Mus musculus	mmu-Pcca_0037	Pcca	236	2
mmu-Pcca_BN_0084.3	Mus musculus	mmu-Pcca_0084	Pcca	236	2
mmu-Pcca_BN_0089.1	Mus musculus	mmu-Pcca_0089	Pcca	236	2
mmu-Pcca_BN_0090.2	Mus musculus	mmu-Pcca_0090	Pcca	236	2
mmu-Pcca_BN_0103.1	Mus musculus	mmu-Pcca_0103	Pcca	236	2
mmu-Pcca_BN_0101.1	Mus musculus	mmu-Pcca_0101	Pcca	236	2
mmu-Pcca_BN_0077.3	Mus musculus	mmu-Pcca_0077	Pcca	236	2
mmu-Pcca_BN_0080.2	Mus musculus	mmu-Pcca_0080	Pcca	236	2
mmu-Pcca_BN_0099.1	Mus musculus	mmu-Pcca_0099	Pcca	236	2
mmu-Pcca_BN_0098.1	Mus musculus	mmu-Pcca_0098	Pcca	236	2
mmu-Pcca_BN_0091.3	Mus musculus	mmu-Pcca_0091	Pcca	236	2
ORF_PCCA_0028_BN_001	Homo sapiens	circ_PCCA_0028	PCCA	236	2
mmu-Pcca_BN_0053.2	Mus musculus	mmu-Pcca_0053	Pcca	236	2
mmu-Pcca_BN_0138.1	Mus musculus	mmu-Pcca_0138	Pcca	236	2
mmu-Pcca_BN_0138.2	Mus musculus	mmu-Pcca_0138	Pcca	236	2
mmu-Pcca_BN_0141.1	Mus musculus	mmu-Pcca_0141	Pcca	236	2
mmu-Pcca_BN_0143.3	Mus musculus	mmu-Pcca_0143	Pcca	236	2
TC-hsa-PCCA_BB_0021.BSJ.1	Homo sapiens	TC-hsa-PCCA_0021	PCCA	236	2
mmu-Pcca_BN_0055.3	Mus musculus	mmu-Pcca_0055	Pcca	236	2
mmu-Pcca_BN_0016.1	Mus musculus	mmu-Pcca_0016	Pcca	236	2
mmu-Pcca_BN_0013.3	Mus musculus	mmu-Pcca_0013	Pcca	236	2
mmu-Pcca_BN_0013.2	Mus musculus	mmu-Pcca_0013	Pcca	236	2
mmu-Pcca_BN_0056.1	Mus musculus	mmu-Pcca_0056	Pcca	236	2
mmu-Pcca_BN_0057.2	Mus musculus	mmu-Pcca_0057	Pcca	236	2
mmu-Pcca_BN_0057.3	Mus musculus	mmu-Pcca_0057	Pcca	236	2
mmu-Pcca_BN_0057.4	Mus musculus	mmu-Pcca_0057	Pcca	236	2
mmu-Pcca_BN_0060.2	Mus musculus	mmu-Pcca_0060	Pcca	236	2
mmu-Pcca_BN_0063.1	Mus musculus	mmu-Pcca_0063	Pcca	236	2
mmu-Pcca_BN_0063.2	Mus musculus	mmu-Pcca_0063	Pcca	236	2
mmu-Pcca_BN_0067.1	Mus musculus	mmu-Pcca_0067	Pcca	236	2
mmu-Pcca_BN_0075.1	Mus musculus	mmu-Pcca_0075	Pcca	236	2
mmu-Pcca_BN_0053.3	Mus musculus	mmu-Pcca_0053	Pcca	236	2
mmu-Pcca_BN_0073.1	Mus musculus	mmu-Pcca_0073	Pcca	236	2
mmu-Pcca_BN_0072.2	Mus musculus	mmu-Pcca_0072	Pcca	236	2
mmu-Pcca_BN_0069.1	Mus musculus	mmu-Pcca_0069	Pcca	236	2
mmu-Pcca_BN_0072.3	Mus musculus	mmu-Pcca_0072	Pcca	236	2
mmu-Pcca_BB_0008.BSJ.1	Mus musculus	mmu-Pcca_0008	Pcca	236	2
mmu-Pcca_BB_0011.BSJ.1	Mus musculus	mmu-Pcca_0011	Pcca	236	2
mmu-Pcca_BB_0009.BSJ.1	Mus musculus	mmu-Pcca_0009	Pcca	236	2
mmu-Pcca_BB_0007.BSJ.1	Mus musculus	mmu-Pcca_0007	Pcca	236	2
mmu_circ_BN_0005021.2	Mus musculus	mmu_circ_0005021	Pcca	236	2
mmu_circ_BN_0005020.1	Mus musculus	mmu_circ_0005020	Pcca	236	2
mmu_circ_BN_0005019.3	Mus musculus	mmu_circ_0005019	Pcca	236	2
mmu_circ_BN_0005019.2	Mus musculus	mmu_circ_0005019	Pcca	236	2
mmu_circ_BN_0005018.2	Mus musculus	mmu_circ_0005018	Pcca	236	2
mmu_circ_BN_0005018.1	Mus musculus	mmu_circ_0005018	Pcca	236	2
mmu_circ_BN_0005013.2	Mus musculus	mmu_circ_0005013	Pcca	236	2
mmu_circ_BN_0005012.2	Mus musculus	mmu_circ_0005012	Pcca	236	2
mmu_circ_BN_0005011.1	Mus musculus	mmu_circ_0005011	Pcca	236	2
mmu-Pcca_BB_0091.BSJ.1	Mus musculus	mmu-Pcca_0091	Pcca	236	2
mmu-Pcca_BB_0098.BSJ.1	Mus musculus	mmu-Pcca_0098	Pcca	236	2
mmu-Pcca_BN_0002.3	Mus musculus	mmu-Pcca_0002	Pcca	236	2
mmu-Pcca_BN_0002.4	Mus musculus	mmu-Pcca_0002	Pcca	236	2
mmu-Pcca_BB_0115.BSJ.1	Mus musculus	mmu-Pcca_0115	Pcca	236	2
mmu-Pcca_BB_0100.BSJ.1	Mus musculus	mmu-Pcca_0100	Pcca	236	2
hsa_circ_BN_0099722.28	Homo sapiens	hsa_circ_0099722	PCCA	236	2
mmu-Pcca_BB_0110.BSJ.1	Mus musculus	mmu-Pcca_0110	Pcca	236	2
hsa_circ_BN_0050451.1	Homo sapiens	hsa_circ_0050451	PEPD	239	2
TC-hsa-PEPD_BN_0005.1	Homo sapiens	TC-hsa-PEPD_0005	PEPD	239	2
mmu-Pepd_BN_0001.1	Mus musculus	mmu-Pepd_0001	Pepd	239	2
mmu-Pepd_BN_0004.1	Mus musculus	mmu-Pepd_0004	Pepd	239	2
mmu-Pepd_BN_0010.1	Mus musculus	mmu-Pepd_0010	Pepd	239	2
mmu-Pepd_BN_0011.1	Mus musculus	mmu-Pepd_0011	Pepd	239	2
hsa-PEPD_BN_0002.1	Homo sapiens	hsa-PEPD_0002	PEPD	239	2
mmu-Pepd_BN_0019.1	Mus musculus	mmu-Pepd_0019	Pepd	239	2
mmu-Pex7_BB_0002.BSJ.1	Mus musculus	mmu-Pex7_0002	Pex7	242	2
mmu-Pex7_BB_0006.BSJ.1	Mus musculus	mmu-Pex7_0006	Pex7	242	2
hsa-PEX7_BN_0027.1	Homo sapiens	hsa-PEX7_0027	PEX7	242	2
mmu-Pex7_BN_0004.1	Mus musculus	mmu-Pex7_0004	Pex7	242	2
mmu-Phka2_BN_0004.1	Mus musculus	mmu-Phka2_0004	Phka2	246	2
mmu-Phka2_BN_0018.1	Mus musculus	mmu-Phka2_0018	Phka2	246	2
mmu-Phka2_BN_0020.1	Mus musculus	mmu-Phka2_0020	Phka2	246	2
mmu-Phka2_BN_0028.1	Mus musculus	mmu-Phka2_0028	Phka2	246	2
hsa-PHKA2_BB_0024.BSJ.1	Homo sapiens	hsa-PHKA2_0024	PHKA2	246	2
mmu-Phkb_BN_0109.4	Mus musculus	mmu-Phkb_0109	Phkb	247	2
mmu-Phkb_BN_0112.1	Mus musculus	mmu-Phkb_0112	Phkb	247	2
mmu-Phkb_BN_0115.1	Mus musculus	mmu-Phkb_0115	Phkb	247	2
ORF_PHKB_0008_BB_001	Homo sapiens	circ_PHKB_0008	PHKB	247	2
ORF_PHKB_0007_BN_001	Homo sapiens	circ_PHKB_0007	PHKB	247	2
ORF_PHKB_0004_BN_001	Homo sapiens	circ_PHKB_0004	PHKB	247	2
ORF_PHKB_0003_BN_001	Homo sapiens	circ_PHKB_0003	PHKB	247	2
mmu-Phkb_BN_0116.1	Mus musculus	mmu-Phkb_0116	Phkb	247	2
SRR13142123_BN_29660gene=Phkb.1	Mus musculus	SRR13142123_29660	Phkb	247	2
hsa-PHKB_BN_0003.2	Homo sapiens	hsa-PHKB_0003	PHKB	247	2
SRR13142109_BN_11918gene=Phkb.1	Mus musculus	SRR13142109_11918	Phkb	247	2
TC-hsa-PHKB_BN_0054.4	Homo sapiens	TC-hsa-PHKB_0054	PHKB	247	2
SRR13142115_BN_26082gene=Phkb.1	Mus musculus	SRR13142115_26082	Phkb	247	2
TC-hsa-PHKB_BN_0053.4	Homo sapiens	TC-hsa-PHKB_0053	PHKB	247	2
TC-hsa-PHKB_BN_0019.2	Homo sapiens	TC-hsa-PHKB_0019	PHKB	247	2
TC-hsa-PHKB_BN_0009.3	Homo sapiens	TC-hsa-PHKB_0009	PHKB	247	2
TC-hsa-PHKB_BN_0008.3	Homo sapiens	TC-hsa-PHKB_0008	PHKB	247	2
mmu-Phkb_BN_0079.2	Mus musculus	mmu-Phkb_0079	Phkb	247	2
mmu-Phkb_BN_0085.1	Mus musculus	mmu-Phkb_0085	Phkb	247	2
mmu-Phkb_BN_0102.1	Mus musculus	mmu-Phkb_0102	Phkb	247	2
hsa-PHKB_BN_0174.2	Homo sapiens	hsa-PHKB_0174	PHKB	247	2
hsa-PHKB_BN_0228.1	Homo sapiens	hsa-PHKB_0228	PHKB	247	2
mmu_circ_BN_0015080.3	Mus musculus	mmu_circ_0015080	Phkb	247	2
mmu_circ_BN_0015080.5	Mus musculus	mmu_circ_0015080	Phkb	247	2
mmu-Phkb_BB_0012.BSJ.1	Mus musculus	mmu-Phkb_0012	Phkb	247	2
mmu-Phkb_BB_0015.BSJ.1	Mus musculus	mmu-Phkb_0015	Phkb	247	2
hsa-PHKB_BN_0006.2	Homo sapiens	hsa-PHKB_0006	PHKB	247	2
hsa-PHKB_BN_0089.1	Homo sapiens	hsa-PHKB_0089	PHKB	247	2
hsa-PHKB_BN_0063.1	Homo sapiens	hsa-PHKB_0063	PHKB	247	2
hsa-PHKB_BN_0052.1	Homo sapiens	hsa-PHKB_0052	PHKB	247	2
hsa-PHKB_BN_0004.1	Homo sapiens	hsa-PHKB_0004	PHKB	247	2
hsa-PHKB_BN_0024.1	Homo sapiens	hsa-PHKB_0024	PHKB	247	2
hsa-PHKB_BN_0025.3	Homo sapiens	hsa-PHKB_0025	PHKB	247	2
hsa-PHKB_BN_0026.2	Homo sapiens	hsa-PHKB_0026	PHKB	247	2
mmu_circ_BN_0015078.1	Mus musculus	mmu_circ_0015078	Phkb	247	2
hsa-PHKB_BN_0023.1	Homo sapiens	hsa-PHKB_0023	PHKB	247	2
hsa-PHKB_BN_0207.1	Homo sapiens	hsa-PHKB_0207	PHKB	247	2
hsa-PHKB_BN_0194.2	Homo sapiens	hsa-PHKB_0194	PHKB	247	2
hsa-PHKB_BN_0184.2	Homo sapiens	hsa-PHKB_0184	PHKB	247	2
hsa-PHKB_BN_0183.5	Homo sapiens	hsa-PHKB_0183	PHKB	247	2
hsa-PHKB_BN_0172.4	Homo sapiens	hsa-PHKB_0172	PHKB	247	2
hsa-PHKB_BN_0109.3	Homo sapiens	hsa-PHKB_0109	PHKB	247	2
mmu-Phkb_BB_0040.BSJ.1	Mus musculus	mmu-Phkb_0040	Phkb	247	2
hsa_circ_BN_0039258.6	Homo sapiens	hsa_circ_0039258	PHKB	247	2
hsa_circ_BN_0039264.1	Homo sapiens	hsa_circ_0039264	PHKB	247	2
hsa_circ_BN_0039265.5	Homo sapiens	hsa_circ_0039265	PHKB	247	2
hsa_circ_BN_0039266.5	Homo sapiens	hsa_circ_0039266	PHKB	247	2
hsa_circ_BN_0039267.6	Homo sapiens	hsa_circ_0039267	PHKB	247	2
TC-hsa-PHKB_BN_0064.4	Homo sapiens	TC-hsa-PHKB_0064	PHKB	247	2
hsa_circ_BN_0039269.5	Homo sapiens	hsa_circ_0039269	PHKB	247	2
hsa_circ_BN_0039271.2	Homo sapiens	hsa_circ_0039271	PHKB	247	2
hsa_circ_BN_0039273.2	Homo sapiens	hsa_circ_0039273	PHKB	247	2
TC-hsa-PHKB_BN_0088.3	Homo sapiens	TC-hsa-PHKB_0088	PHKB	247	2
hsa_circ_BN_0039257.5	Homo sapiens	hsa_circ_0039257	PHKB	247	2
hsa-PHKB_BB_0033.BSJ.1	Homo sapiens	hsa-PHKB_0033	PHKB	247	2
TC-hsa-PHKB_BN_0089.3	Homo sapiens	TC-hsa-PHKB_0089	PHKB	247	2
hsa_circ_BN_0039274.5	Homo sapiens	hsa_circ_0039274	PHKB	247	2
TC-hsa-PHKB_BN_0089.4	Homo sapiens	TC-hsa-PHKB_0089	PHKB	247	2
mmu-Phkb_BN_0005.2	Mus musculus	mmu-Phkb_0005	Phkb	247	2
TC-hsa-PHKB_BN_0090.2	Homo sapiens	TC-hsa-PHKB_0090	PHKB	247	2
hsa_circ_BN_0105446.2	Homo sapiens	hsa_circ_0105446	PHKB	247	2
hsa_circ_BN_0105450.2	Homo sapiens	hsa_circ_0105450	PHKB	247	2
hsa_circ_BN_0105451.2	Homo sapiens	hsa_circ_0105451	PHKB	247	2
hsa_circ_BN_0039277.5	Homo sapiens	hsa_circ_0039277	PHKB	247	2
hsa_circ_BN_0039278.2	Homo sapiens	hsa_circ_0039278	PHKB	247	2
hsa_circ_BN_0039279.5	Homo sapiens	hsa_circ_0039279	PHKB	247	2
hsa_circ_BN_0039276.4	Homo sapiens	hsa_circ_0039276	PHKB	247	2
TC-hsa-PHKB_BN_0087.2	Homo sapiens	TC-hsa-PHKB_0087	PHKB	247	2
TC-hsa-PHKB_BN_0081.1	Homo sapiens	TC-hsa-PHKB_0081	PHKB	247	2
mmu-Phkb_BN_0075.3	Mus musculus	mmu-Phkb_0075	Phkb	247	2
mmu-Phkb_BN_0067.1	Mus musculus	mmu-Phkb_0067	Phkb	247	2
TC-hsa-PHKB_BN_0073.2	Homo sapiens	TC-hsa-PHKB_0073	PHKB	247	2
TC-hsa-PHKB_BN_0072.1	Homo sapiens	TC-hsa-PHKB_0072	PHKB	247	2
hsa_circ_BN_0039256.5	Homo sapiens	hsa_circ_0039256	PHKB	247	2
hsa_circ_BN_0039253.6	Homo sapiens	hsa_circ_0039253	PHKB	247	2
hsa_circ_BN_0002820.2	Homo sapiens	hsa_circ_0002820	PHKB	247	2
mmu-Phkb_BN_0049.2	Mus musculus	mmu-Phkb_0049	Phkb	247	2
hsa_circ_BB_0039284.BSJ.1	Homo sapiens	hsa_circ_0039284	PHKB	247	2
hsa-PHKB_BB_0231.BSJ.1	Homo sapiens	hsa-PHKB_0231	PHKB	247	2
mmu-Phkb_BN_0038.1	Mus musculus	mmu-Phkb_0038	Phkb	247	2
mmu-Phkb_BN_0021.1	Mus musculus	mmu-Phkb_0021	Phkb	247	2
TC-hsa-PHKB_BN_0079.2	Homo sapiens	TC-hsa-PHKB_0079	PHKB	247	2
mmu-Phkb_BN_0018.1	Mus musculus	mmu-Phkb_0018	Phkb	247	2
mmu-Phkb_BN_0014.1	Mus musculus	mmu-Phkb_0014	Phkb	247	2
TC-hsa-PHKB_BN_0074.7	Homo sapiens	TC-hsa-PHKB_0074	PHKB	247	2
TC-hsa-PHKB_BN_0076.1	Homo sapiens	TC-hsa-PHKB_0076	PHKB	247	2
mmu-Phkb_BN_0015.1	Mus musculus	mmu-Phkb_0015	Phkb	247	2
TC-hsa-PHKB_BN_0065.5	Homo sapiens	TC-hsa-PHKB_0065	PHKB	247	2
mmu_circ_BN_0001710.1	Mus musculus	mmu_circ_0001710	Phkb	247	2
hsa-PHKB_BB_0173.BSJ.2	Homo sapiens	hsa-PHKB_0173	PHKB	247	2
mmu-Phkb_BN_0030.1	Mus musculus	mmu-Phkb_0030	Phkb	247	2
mmu-Phkb_BN_0027.1	Mus musculus	mmu-Phkb_0027	Phkb	247	2
mmu-Pkd1_BN_0022.1	Mus musculus	mmu-Pkd1_0022	Pkd1	250	2
hsa-PKD1_BN_0018.2	Homo sapiens	hsa-PKD1_0018	PKD1	250	2
hsa_circ_BB_0009887.BSJ.1	Homo sapiens	hsa_circ_0009887	PLOD1	256	2
mmu-Plod1_BB_0002.BSJ.1	Mus musculus	mmu-Plod1_0002	Plod1	256	2
hsa-PLOD1_BB_0031.BSJ.1	Homo sapiens	hsa-PLOD1_0031	PLOD1	256	2
hsa-PLOD1_BB_0008.BSJ.1	Homo sapiens	hsa-PLOD1_0008	PLOD1	256	2
hsa_circ_BN_0007432.1	Homo sapiens	hsa_circ_0007432	PMM2	257	2
mmu-Pmm2_BN_0011.1	Mus musculus	mmu-Pmm2_0011	Pmm2	257	2
mmu-Pmm2_BN_0013.1	Mus musculus	mmu-Pmm2_0013	Pmm2	257	2
TC-hsa-PMM2_BN_0004.1	Homo sapiens	TC-hsa-PMM2_0004	PMM2	257	2
mmu-Pmm2_BN_0004.1	Mus musculus	mmu-Pmm2_0004	Pmm2	257	2
mmu-Pmm2_BN_0002.1	Mus musculus	mmu-Pmm2_0002	Pmm2	257	2
mmu-Pmm2_BN_0001.1	Mus musculus	mmu-Pmm2_0001	Pmm2	257	2
mmu-Pten_BN_0003.1	Mus musculus	mmu-Pten_0003	Pten	265	2
mmu-Pten_BN_0005.1	Mus musculus	mmu-Pten_0005	Pten	265	2
mmu-Pten_BN_0006.2	Mus musculus	mmu-Pten_0006	Pten	265	2
mmu-Pten_BN_0006.3	Mus musculus	mmu-Pten_0006	Pten	265	2
mmu-Pten_BN_0008.2	Mus musculus	mmu-Pten_0008	Pten	265	2
mmu-Pten_BN_0008.3	Mus musculus	mmu-Pten_0008	Pten	265	2
hsa-PTEN_BN_0080.5	Homo sapiens	hsa-PTEN_0080	PTEN	265	2
mmu-Pten_BN_0008.1	Mus musculus	mmu-Pten_0008	Pten	265	2
mmu-Pten_BN_0002.1	Mus musculus	mmu-Pten_0002	Pten	265	2
hsa-PTEN_BN_0109.4	Homo sapiens	hsa-PTEN_0109	PTEN	265	2
mmu-Pten_BB_0030.BSJ.1	Mus musculus	mmu-Pten_0030	Pten	265	2
mmu-Pten_BB_0007.BSJ.1	Mus musculus	mmu-Pten_0007	Pten	265	2
SRR13142111_BN_16876gene=Pten.1	Mus musculus	SRR13142111_16876	Pten	265	2
mmu-Pten_BN_0001.1	Mus musculus	mmu-Pten_0001	Pten	265	2
hsa-PTEN_BN_0108.1	Homo sapiens	hsa-PTEN_0108	PTEN	265	2
hsa-PTEN_BN_0103.2	Homo sapiens	hsa-PTEN_0103	PTEN	265	2
hsa-PTEN_BN_0103.1	Homo sapiens	hsa-PTEN_0103	PTEN	265	2
mmu-Pten_BN_0020.1	Mus musculus	mmu-Pten_0020	Pten	265	2
mmu-Pten_BN_0033.2	Mus musculus	mmu-Pten_0033	Pten	265	2
mmu-Pten_BN_0033.1	Mus musculus	mmu-Pten_0033	Pten	265	2
mmu-Pten_BN_0030.1	Mus musculus	mmu-Pten_0030	Pten	265	2
mmu-Pten_BN_0027.1	Mus musculus	mmu-Pten_0027	Pten	265	2
TC-hsa-PTEN_BN_0039.2	Homo sapiens	TC-hsa-PTEN_0039	PTEN	265	2
TC-hsa-PTEN_BN_0035.3	Homo sapiens	TC-hsa-PTEN_0035	PTEN	265	2
TC-hsa-PTEN_BN_0035.2	Homo sapiens	TC-hsa-PTEN_0035	PTEN	265	2
TC-hsa-PTEN_BN_0033.1	Homo sapiens	TC-hsa-PTEN_0033	PTEN	265	2
TC-hsa-PTEN_BN_0030.3	Homo sapiens	TC-hsa-PTEN_0030	PTEN	265	2
hsa-PTEN_BN_0072.1	Homo sapiens	hsa-PTEN_0072	PTEN	265	2
mmu-Pten_BN_0010.1	Mus musculus	mmu-Pten_0010	Pten	265	2
hsa-PTEN_BN_0069.1	Homo sapiens	hsa-PTEN_0069	PTEN	265	2
hsa-PTEN_BN_0066.1	Homo sapiens	hsa-PTEN_0066	PTEN	265	2
mmu-Pten_BN_0012.2	Mus musculus	mmu-Pten_0012	Pten	265	2
mmu-Pten_BN_0016.1	Mus musculus	mmu-Pten_0016	Pten	265	2
mmu-Pten_BN_0016.3	Mus musculus	mmu-Pten_0016	Pten	265	2
mmu-Pten_BN_0017.1	Mus musculus	mmu-Pten_0017	Pten	265	2
mmu-Pten_BN_0022.1	Mus musculus	mmu-Pten_0022	Pten	265	2
mmu-Pten_BN_0024.1	Mus musculus	mmu-Pten_0024	Pten	265	2
mmu-Pten_BN_0016.2	Mus musculus	mmu-Pten_0016	Pten	265	2
mmu-Pten_BN_0012.1	Mus musculus	mmu-Pten_0012	Pten	265	2
ORF_PTEN_0006_BB_001	Homo sapiens	circ_PTEN_0006	PTEN	265	2
hsa-PTEN_BN_0012.2	Homo sapiens	hsa-PTEN_0012	PTEN	265	2
hsa-PTEN_BN_0020.1	Homo sapiens	hsa-PTEN_0020	PTEN	265	2
hsa-PTEN_BN_0025.1	Homo sapiens	hsa-PTEN_0025	PTEN	265	2
hsa-PTEN_BN_0027.1	Homo sapiens	hsa-PTEN_0027	PTEN	265	2
hsa-PTEN_BN_0011.1	Homo sapiens	hsa-PTEN_0011	PTEN	265	2
hsa-PTEN_BN_0033.1	Homo sapiens	hsa-PTEN_0033	PTEN	265	2
hsa-PTEN_BN_0035.1	Homo sapiens	hsa-PTEN_0035	PTEN	265	2
hsa-PTEN_BN_0123.1	Homo sapiens	hsa-PTEN_0123	PTEN	265	2
hsa-PTEN_BN_0120.1	Homo sapiens	hsa-PTEN_0120	PTEN	265	2
hsa-PTEN_BN_0041.1	Homo sapiens	hsa-PTEN_0041	PTEN	265	2
hsa-PTEN_BN_0041.2	Homo sapiens	hsa-PTEN_0041	PTEN	265	2
ORF_PTEN_0008_BB_001	Homo sapiens	circ_PTEN_0008	PTEN	265	2
ORF_PTEN_0009_BB_001	Homo sapiens	circ_PTEN_0009	PTEN	265	2
hsa_circ_BN_0019060.2	Homo sapiens	hsa_circ_0019060	PTEN	265	2
TC-hsa-PTEN_BN_0030.2	Homo sapiens	TC-hsa-PTEN_0030	PTEN	265	2
TC-hsa-PTEN_BN_0029.1	Homo sapiens	TC-hsa-PTEN_0029	PTEN	265	2
hsa-PTEN_BN_0002.1	Homo sapiens	hsa-PTEN_0002	PTEN	265	2
hsa-PTEN_BN_0005.1	Homo sapiens	hsa-PTEN_0005	PTEN	265	2
hsa-PTEN_BN_0008.1	Homo sapiens	hsa-PTEN_0008	PTEN	265	2
hsa-PTEN_BN_0009.1	Homo sapiens	hsa-PTEN_0009	PTEN	265	2
TC-hsa-PTEN_BN_0026.1	Homo sapiens	TC-hsa-PTEN_0026	PTEN	265	2
TC-hsa-PTEN_BN_0016.2	Homo sapiens	TC-hsa-PTEN_0016	PTEN	265	2
TC-hsa-PTEN_BN_0016.1	Homo sapiens	TC-hsa-PTEN_0016	PTEN	265	2
TC-hsa-PTEN_BN_0015.1	Homo sapiens	TC-hsa-PTEN_0015	PTEN	265	2
ORF_PTEN_0004_BN_001	Homo sapiens	circ_PTEN_0004	PTEN	265	2
hsa-PTEN_BN_0057.1	Homo sapiens	hsa-PTEN_0057	PTEN	265	2
hsa-PTEN_BN_0126.4	Homo sapiens	hsa-PTEN_0126	PTEN	265	2
hsa-PTEN_BN_0134.1	Homo sapiens	hsa-PTEN_0134	PTEN	265	2
hsa_circ_BN_0019060.1	Homo sapiens	hsa_circ_0019060	PTEN	265	2
hsa_circ_BN_0019059.1	Homo sapiens	hsa_circ_0019059	PTEN	265	2
hsa_circ_BN_0002232.1	Homo sapiens	hsa_circ_0002232	PTEN	265	2
ORF_PTEN_0003_BN_001	Homo sapiens	circ_PTEN_0003	PTEN	265	2
ORF_PTEN_0002_BB_001	Homo sapiens	circ_PTEN_0002	PTEN	265	2
hsa_circ_BN_0002934.1	Homo sapiens	hsa_circ_0002934	PTEN	265	2
mmu-Pts_BN_0001.1	Mus musculus	mmu-Pts_0001	Pts	268	2
hsa-PTS_BB_0011.BSJ.1	Homo sapiens	hsa-PTS_0011	PTS	268	2
hsa_circ_BB_0025343.BSJ.1	Homo sapiens	hsa_circ_0025343	PEX5	270	2
TC-hsa-PEX5_BB_0005.BSJ.1	Homo sapiens	TC-hsa-PEX5_0005	PEX5	270	2
TC-hsa-PEX5_BB_0001.BSJ.1	Homo sapiens	TC-hsa-PEX5_0001	PEX5	270	2
hsa-PEX5_BB_0001.BSJ.1	Homo sapiens	hsa-PEX5_0001	PEX5	270	2
mmu-Pex5_BN_0010.1	Mus musculus	mmu-Pex5_0010	Pex5	270	2
mmu-Pex5_BB_0008.BSJ.1	Mus musculus	mmu-Pex5_0008	Pex5	270	2
mmu-Pex5_BB_0005.BSJ.1	Mus musculus	mmu-Pex5_0005	Pex5	270	2
mmu_circ_BN_0013058.1	Mus musculus	mmu_circ_0013058	Pex5	270	2
mmu-Rb1_BN_0037.1	Mus musculus	mmu-Rb1_0037	Rb1	272	2
hsa-RB1_BN_0099.4	Homo sapiens	hsa-RB1_0099	RB1	272	2
mmu-Rb1_BN_0059.3	Mus musculus	mmu-Rb1_0059	Rb1	272	2
hsa-RB1_BN_0096.1	Homo sapiens	hsa-RB1_0096	RB1	272	2
hsa-RB1_BN_0093.2	Homo sapiens	hsa-RB1_0093	RB1	272	2
hsa-RB1_BN_0086.1	Homo sapiens	hsa-RB1_0086	RB1	272	2
hsa-RB1_BN_0077.2	Homo sapiens	hsa-RB1_0077	RB1	272	2
hsa-RB1_BN_0083.7	Homo sapiens	hsa-RB1_0083	RB1	272	2
hsa-RB1_BN_0083.4	Homo sapiens	hsa-RB1_0083	RB1	272	2
hsa-RB1_BN_0093.3	Homo sapiens	hsa-RB1_0093	RB1	272	2
hsa-RB1_BN_0102.1	Homo sapiens	hsa-RB1_0102	RB1	272	2
hsa-RB1_BN_0120.4	Homo sapiens	hsa-RB1_0120	RB1	272	2
hsa-RB1_BN_0106.1	Homo sapiens	hsa-RB1_0106	RB1	272	2
mmu-Rb1_BN_0054.1	Mus musculus	mmu-Rb1_0054	Rb1	272	2
mmu-Rb1_BN_0059.1	Mus musculus	mmu-Rb1_0059	Rb1	272	2
mmu-Rb1_BN_0067.3	Mus musculus	mmu-Rb1_0067	Rb1	272	2
mmu-Rb1_BN_0067.1	Mus musculus	mmu-Rb1_0067	Rb1	272	2
mmu-Rb1_BN_0063.1	Mus musculus	mmu-Rb1_0063	Rb1	272	2
mmu-Rb1_BN_0035.1	Mus musculus	mmu-Rb1_0035	Rb1	272	2
hsa-RB1_BN_0120.1	Homo sapiens	hsa-RB1_0120	RB1	272	2
hsa-RB1_BN_0119.1	Homo sapiens	hsa-RB1_0119	RB1	272	2
hsa-RB1_BN_0112.7	Homo sapiens	hsa-RB1_0112	RB1	272	2
hsa-RB1_BN_0112.4	Homo sapiens	hsa-RB1_0112	RB1	272	2
hsa_circ_BB_0030233.BSJ.1	Homo sapiens	hsa_circ_0030233	RB1	272	2
TC-hsa-RB1_BN_0021.1	Homo sapiens	TC-hsa-RB1_0021	RB1	272	2
hsa-RB1_BB_0126.BSJ.1	Homo sapiens	hsa-RB1_0126	RB1	272	2
hsa-RB1_BN_0042.2	Homo sapiens	hsa-RB1_0042	RB1	272	2
hsa-RB1_BN_0031.1	Homo sapiens	hsa-RB1_0031	RB1	272	2
hsa-RB1_BN_0025.8	Homo sapiens	hsa-RB1_0025	RB1	272	2
hsa-RB1_BN_0025.7	Homo sapiens	hsa-RB1_0025	RB1	272	2
hsa-RB1_BN_0025.4	Homo sapiens	hsa-RB1_0025	RB1	272	2
hsa-RB1_BN_0021.1	Homo sapiens	hsa-RB1_0021	RB1	272	2
hsa_circ_BN_0030229.5	Homo sapiens	hsa_circ_0030229	RB1	272	2
hsa_circ_BN_0030232.6	Homo sapiens	hsa_circ_0030232	RB1	272	2
hsa_circ_BN_0030231.1	Homo sapiens	hsa_circ_0030231	RB1	272	2
hsa-RB1_BN_0046.1	Homo sapiens	hsa-RB1_0046	RB1	272	2
hsa_circ_BN_0030232.3	Homo sapiens	hsa_circ_0030232	RB1	272	2
hsa-RB1_BN_0051.3	Homo sapiens	hsa-RB1_0051	RB1	272	2
hsa-RB1_BN_0051.7	Homo sapiens	hsa-RB1_0051	RB1	272	2
hsa-RB1_BN_0007.1	Homo sapiens	hsa-RB1_0007	RB1	272	2
hsa-RB1_BN_0008.1	Homo sapiens	hsa-RB1_0008	RB1	272	2
hsa-RB1_BN_0075.8	Homo sapiens	hsa-RB1_0075	RB1	272	2
hsa-RB1_BN_0075.7	Homo sapiens	hsa-RB1_0075	RB1	272	2
hsa-RB1_BN_0075.4	Homo sapiens	hsa-RB1_0075	RB1	272	2
hsa-RB1_BN_0071.1	Homo sapiens	hsa-RB1_0071	RB1	272	2
hsa-RB1_BN_0051.6	Homo sapiens	hsa-RB1_0051	RB1	272	2
SRR13142115_BN_53169gene=Rb1.1	Mus musculus	SRR13142115_53169	Rb1	272	2
SRR13142117_BN_75600gene=Rb1.1	Mus musculus	SRR13142117_75600	Rb1	272	2
TC-hsa-RB1_BN_0030.1	Homo sapiens	TC-hsa-RB1_0030	RB1	272	2
TC-hsa-RB1_BN_0031.1	Homo sapiens	TC-hsa-RB1_0031	RB1	272	2
TC-hsa-RB1_BN_0031.4	Homo sapiens	TC-hsa-RB1_0031	RB1	272	2
TC-hsa-RB1_BN_0034.1	Homo sapiens	TC-hsa-RB1_0034	RB1	272	2
TC-hsa-RB1_BN_0036.2	Homo sapiens	TC-hsa-RB1_0036	RB1	272	2
TC-hsa-RB1_BN_0039.2	Homo sapiens	TC-hsa-RB1_0039	RB1	272	2
TC-hsa-RB1_BN_0039.5	Homo sapiens	TC-hsa-RB1_0039	RB1	272	2
TC-hsa-RB1_BN_0041.5	Homo sapiens	TC-hsa-RB1_0041	RB1	272	2
TC-hsa-RB1_BN_0041.8	Homo sapiens	TC-hsa-RB1_0041	RB1	272	2
TC-hsa-RB1_BN_0050.3	Homo sapiens	TC-hsa-RB1_0050	RB1	272	2
TC-hsa-RB1_BN_0055.3	Homo sapiens	TC-hsa-RB1_0055	RB1	272	2
TC-hsa-RB1_BN_0014.4	Homo sapiens	TC-hsa-RB1_0014	RB1	272	2
TC-hsa-RB1_BN_0012.2	Homo sapiens	TC-hsa-RB1_0012	RB1	272	2
TC-hsa-RB1_BN_0012.1	Homo sapiens	TC-hsa-RB1_0012	RB1	272	2
TC-hsa-RB1_BN_0011.1	Homo sapiens	TC-hsa-RB1_0011	RB1	272	2
TC-hsa-RB1_BN_0005.5	Homo sapiens	TC-hsa-RB1_0005	RB1	272	2
hsa_circ_BB_0100637.BSJ.1	Homo sapiens	hsa_circ_0100637	RB1	272	2
hsa_circ_BB_0100644.BSJ.1	Homo sapiens	hsa_circ_0100644	RB1	272	2
TC-hsa-RB1_BN_0052.1	Homo sapiens	TC-hsa-RB1_0052	RB1	272	2
hsa_circ_BN_0030229.1	Homo sapiens	hsa_circ_0030229	RB1	272	2
mmu-Rb1_BN_0039.1	Mus musculus	mmu-Rb1_0039	Rb1	272	2
TC-hsa-RB1_BN_0014.7	Homo sapiens	TC-hsa-RB1_0014	RB1	272	2
TC-hsa-RB1_BN_0022.1	Homo sapiens	TC-hsa-RB1_0022	RB1	272	2
TC-hsa-RB1_BN_0023.1	Homo sapiens	TC-hsa-RB1_0023	RB1	272	2
TC-hsa-RB1_BN_0023.2	Homo sapiens	TC-hsa-RB1_0023	RB1	272	2
TC-hsa-RB1_BN_0024.2	Homo sapiens	TC-hsa-RB1_0024	RB1	272	2
TC-hsa-RB1_BN_0024.3	Homo sapiens	TC-hsa-RB1_0024	RB1	272	2
TC-hsa-RB1_BN_0025.1	Homo sapiens	TC-hsa-RB1_0025	RB1	272	2
TC-hsa-RB1_BN_0025.4	Homo sapiens	TC-hsa-RB1_0025	RB1	272	2
TC-hsa-RB1_BN_0025.5	Homo sapiens	TC-hsa-RB1_0025	RB1	272	2
TC-hsa-RB1_BN_0028.1	Homo sapiens	TC-hsa-RB1_0028	RB1	272	2
TC-hsa-RB1_BN_0028.2	Homo sapiens	TC-hsa-RB1_0028	RB1	272	2
mmu-Rb1_BN_0043.1	Mus musculus	mmu-Rb1_0043	Rb1	272	2
TC-hsa-RB1_BN_0019.4	Homo sapiens	TC-hsa-RB1_0019	RB1	272	2
TC-hsa-RB1_BN_0019.1	Homo sapiens	TC-hsa-RB1_0019	RB1	272	2
TC-hsa-RB1_BN_0018.3	Homo sapiens	TC-hsa-RB1_0018	RB1	272	2
TC-hsa-RB1_BN_0018.2	Homo sapiens	TC-hsa-RB1_0018	RB1	272	2
TC-hsa-RB1_BN_0017.2	Homo sapiens	TC-hsa-RB1_0017	RB1	272	2
TC-hsa-RB1_BN_0017.1	Homo sapiens	TC-hsa-RB1_0017	RB1	272	2
TC-hsa-RB1_BN_0016.1	Homo sapiens	TC-hsa-RB1_0016	RB1	272	2
TC-hsa-RB1_BN_0014.8	Homo sapiens	TC-hsa-RB1_0014	RB1	272	2
TC-hsa-RB1_BN_0019.5	Homo sapiens	TC-hsa-RB1_0019	RB1	272	2
hsa_circ_BN_0030229.4	Homo sapiens	hsa_circ_0030229	RB1	272	2
hsa-RB1_BN_0124.1	Homo sapiens	hsa-RB1_0124	RB1	272	2
hsa_circ_BN_0100644.1	Homo sapiens	hsa_circ_0100644	RB1	272	2
hsa_circ_BN_0100643.1	Homo sapiens	hsa_circ_0100643	RB1	272	2
hsa_circ_BN_0100642.1	Homo sapiens	hsa_circ_0100642	RB1	272	2
hsa_circ_BN_0100641.1	Homo sapiens	hsa_circ_0100641	RB1	272	2
hsa_circ_BN_0100640.4	Homo sapiens	hsa_circ_0100640	RB1	272	2
hsa_circ_BN_0100640.1	Homo sapiens	hsa_circ_0100640	RB1	272	2
hsa_circ_BN_0100639.1	Homo sapiens	hsa_circ_0100639	RB1	272	2
hsa_circ_BN_0100638.5	Homo sapiens	hsa_circ_0100638	RB1	272	2
hsa-RB1_BN_0129.1	Homo sapiens	hsa-RB1_0129	RB1	272	2
hsa_circ_BN_0100638.4	Homo sapiens	hsa_circ_0100638	RB1	272	2
hsa_circ_BN_0100637.2	Homo sapiens	hsa_circ_0100637	RB1	272	2
hsa-RB1_BN_0120.5	Homo sapiens	hsa-RB1_0120	RB1	272	2
hsa_circ_BN_0100637.1	Homo sapiens	hsa_circ_0100637	RB1	272	2
SRR13142123_BN_13414gene=Rb1.3	Mus musculus	SRR13142123_13414	Rb1	272	2
SRR13142123_BN_13414gene=Rb1.1	Mus musculus	SRR13142123_13414	Rb1	272	2
hsa_circ_BN_0100638.1	Homo sapiens	hsa_circ_0100638	RB1	272	2
TC-hsa-RB1_BN_0005.4	Homo sapiens	TC-hsa-RB1_0005	RB1	272	2
hsa-RB1_BN_0129.4	Homo sapiens	hsa-RB1_0129	RB1	272	2
TC-hsa-RB1_BN_0005.1	Homo sapiens	TC-hsa-RB1_0005	RB1	272	2
TC-hsa-RB1_BN_0002.2	Homo sapiens	TC-hsa-RB1_0002	RB1	272	2
hsa-RB1_BB_0119.BSJ.1	Homo sapiens	hsa-RB1_0119	RB1	272	2
hsa-RB1_BB_0062.BSJ.1	Homo sapiens	hsa-RB1_0062	RB1	272	2
hsa-RB1_BN_0129.5	Homo sapiens	hsa-RB1_0129	RB1	272	2
hsa-RB1_BB_0046.BSJ.1	Homo sapiens	hsa-RB1_0046	RB1	272	2
hsa-RB1_BB_0023.BSJ.1	Homo sapiens	hsa-RB1_0023	RB1	272	2
TC-hsa-RB1_BN_0002.1	Homo sapiens	TC-hsa-RB1_0002	RB1	272	2
TC-hsa-RB1_BB_0059.BSJ.1	Homo sapiens	TC-hsa-RB1_0059	RB1	272	2
TC-hsa-RB1_BB_0056.BSJ.1	Homo sapiens	TC-hsa-RB1_0056	RB1	272	2
TC-hsa-RB1_BB_0050.BSJ.1	Homo sapiens	TC-hsa-RB1_0050	RB1	272	2
TC-hsa-RB1_BB_0030.BSJ.1	Homo sapiens	TC-hsa-RB1_0030	RB1	272	2
hsa_circ_BN_0030231.4	Homo sapiens	hsa_circ_0030231	RB1	272	2
mmu-Rb1_BN_0002.1	Mus musculus	mmu-Rb1_0002	Rb1	272	2
mmu-Rb1_BN_0022.1	Mus musculus	mmu-Rb1_0022	Rb1	272	2
mmu-Rb1_BB_0005.BSJ.1	Mus musculus	mmu-Rb1_0005	Rb1	272	2
mmu-Rb1_BB_0008.BSJ.1	Mus musculus	mmu-Rb1_0008	Rb1	272	2
mmu-Rb1_BB_0009.BSJ.1	Mus musculus	mmu-Rb1_0009	Rb1	272	2
mmu-Rb1_BB_0011.BSJ.1	Mus musculus	mmu-Rb1_0011	Rb1	272	2
mmu-Rb1_BB_0012.BSJ.1	Mus musculus	mmu-Rb1_0012	Rb1	272	2
mmu-Rb1_BB_0013.BSJ.1	Mus musculus	mmu-Rb1_0013	Rb1	272	2
mmu-Rb1_BB_0019.BSJ.1	Mus musculus	mmu-Rb1_0019	Rb1	272	2
mmu-Rb1_BB_0020.BSJ.1	Mus musculus	mmu-Rb1_0020	Rb1	272	2
mmu-Rb1_BN_0017.1	Mus musculus	mmu-Rb1_0017	Rb1	272	2
mmu-Rb1_BB_0027.BSJ.1	Mus musculus	mmu-Rb1_0027	Rb1	272	2
mmu-Rb1_BB_0029.BSJ.1	Mus musculus	mmu-Rb1_0029	Rb1	272	2
mmu-Rb1_BB_0032.BSJ.1	Mus musculus	mmu-Rb1_0032	Rb1	272	2
mmu-Rb1_BB_0035.BSJ.1	Mus musculus	mmu-Rb1_0035	Rb1	272	2
mmu-Rb1_BB_0044.BSJ.1	Mus musculus	mmu-Rb1_0044	Rb1	272	2
mmu-Rb1_BB_0047.BSJ.1	Mus musculus	mmu-Rb1_0047	Rb1	272	2
mmu-Rb1_BB_0059.BSJ.1	Mus musculus	mmu-Rb1_0059	Rb1	272	2
mmu_circ_BN_0005427.3	Mus musculus	mmu_circ_0005427	Rb1	272	2
mmu-Rb1_BB_0063.BSJ.1	Mus musculus	mmu-Rb1_0063	Rb1	272	2
mmu_circ_BN_0005426.3	Mus musculus	mmu_circ_0005426	Rb1	272	2
mmu-Rb1_BN_0022.2	Mus musculus	mmu-Rb1_0022	Rb1	272	2
mmu-Rb1_BN_0022.4	Mus musculus	mmu-Rb1_0022	Rb1	272	2
mmu-Rb1_BN_0026.1	Mus musculus	mmu-Rb1_0026	Rb1	272	2
mmu-Rb1_BN_0029.1	Mus musculus	mmu-Rb1_0029	Rb1	272	2
mmu-Rb1_BN_0030.1	Mus musculus	mmu-Rb1_0030	Rb1	272	2
mmu-Rb1_BN_0033.1	Mus musculus	mmu-Rb1_0033	Rb1	272	2
mmu-Rb1_BN_0020.3	Mus musculus	mmu-Rb1_0020	Rb1	272	2
mmu-Rb1_BN_0020.1	Mus musculus	mmu-Rb1_0020	Rb1	272	2
mmu-Rb1_BN_0019.6	Mus musculus	mmu-Rb1_0019	Rb1	272	2
mmu-Rb1_BN_0019.4	Mus musculus	mmu-Rb1_0019	Rb1	272	2
mmu-Rb1_BN_0019.1	Mus musculus	mmu-Rb1_0019	Rb1	272	2
mmu_circ_BN_0005426.1	Mus musculus	mmu_circ_0005426	Rb1	272	2
mmu_circ_BN_0005427.1	Mus musculus	mmu_circ_0005427	Rb1	272	2
mmu-Rb1_BN_0001.1	Mus musculus	mmu-Rb1_0001	Rb1	272	2
mmu_circ_BN_0005428.1	Mus musculus	mmu_circ_0005428	Rb1	272	2
mmu-Rb1_BN_0003.1	Mus musculus	mmu-Rb1_0003	Rb1	272	2
hsa_circ_BN_0131291.40	Homo sapiens	hsa_circ_0131291	ATXN1	281	2
mmu-Atxn1_BN_0028.1	Mus musculus	mmu-Atxn1_0028	Atxn1	281	2
mmu-Atxn1_BB_0089.BSJ.1	Mus musculus	mmu-Atxn1_0089	Atxn1	281	2
hsa_circ_BB_0007872.BSJ.1	Homo sapiens	hsa_circ_0007872	ATXN1	281	2
hsa_circ_BN_0131290.58	Homo sapiens	hsa_circ_0131290	ATXN1	281	2
hsa_circ_BN_0005159.2008	Homo sapiens	hsa_circ_0005159	SMN2	292	2
mmu-Smn1_BN_0006.1	Mus musculus	mmu-Smn1_0006	Smn1	292	2
mmu-Tcn2_BN_0005.2	Mus musculus	mmu-Tcn2_0005	Tcn2	303	2
hsa-TCN2_BB_0015.BSJ.1	Homo sapiens	hsa-TCN2_0015	TCN2	303	2
hsa-TCN2_BB_0002.BSJ.1	Homo sapiens	hsa-TCN2_0002	TCN2	303	2
hsa-TSC1_BN_0068.1	Homo sapiens	hsa-TSC1_0068	TSC1	314	2
hsa-TSC1_BN_0066.1	Homo sapiens	hsa-TSC1_0066	TSC1	314	2
hsa-TSC1_BN_0054.1	Homo sapiens	hsa-TSC1_0054	TSC1	314	2
hsa-TSC1_BN_0043.1	Homo sapiens	hsa-TSC1_0043	TSC1	314	2
hsa-TSC1_BN_0039.1	Homo sapiens	hsa-TSC1_0039	TSC1	314	2
hsa-TSC1_BN_0066.2	Homo sapiens	hsa-TSC1_0066	TSC1	314	2
TC-hsa-TSC1_BN_0005.4	Homo sapiens	TC-hsa-TSC1_0005	TSC1	314	2
mmu-Tsc1_BN_0024.1	Mus musculus	mmu-Tsc1_0024	Tsc1	314	2
TC-hsa-TSC1_BN_0021.2	Homo sapiens	TC-hsa-TSC1_0021	TSC1	314	2
SRR13142117_BN_6441gene=Tsc1.1	Mus musculus	SRR13142117_6441	Tsc1	314	2
mmu-Tsc1_BN_0033.1	Mus musculus	mmu-Tsc1_0033	Tsc1	314	2
mmu-Tsc1_BN_0027.2	Mus musculus	mmu-Tsc1_0027	Tsc1	314	2
mmu-Tsc1_BN_0027.1	Mus musculus	mmu-Tsc1_0027	Tsc1	314	2
mmu-Tsc1_BN_0022.1	Mus musculus	mmu-Tsc1_0022	Tsc1	314	2
mmu-Tsc1_BN_0020.1	Mus musculus	mmu-Tsc1_0020	Tsc1	314	2
mmu-Tsc1_BN_0019.1	Mus musculus	mmu-Tsc1_0019	Tsc1	314	2
TC-hsa-TSC1_BN_0021.1	Homo sapiens	TC-hsa-TSC1_0021	TSC1	314	2
mmu-Tsc1_BN_0014.1	Mus musculus	mmu-Tsc1_0014	Tsc1	314	2
mmu-Tsc1_BN_0008.1	Mus musculus	mmu-Tsc1_0008	Tsc1	314	2
TC-hsa-TSC1_BN_0033.1	Homo sapiens	TC-hsa-TSC1_0033	TSC1	314	2
TC-hsa-TSC1_BN_0032.1	Homo sapiens	TC-hsa-TSC1_0032	TSC1	314	2
TC-hsa-TSC1_BN_0030.1	Homo sapiens	TC-hsa-TSC1_0030	TSC1	314	2
TC-hsa-TSC1_BN_0029.1	Homo sapiens	TC-hsa-TSC1_0029	TSC1	314	2
TC-hsa-TSC1_BN_0022.1	Homo sapiens	TC-hsa-TSC1_0022	TSC1	314	2
mmu-Tsc1_BN_0010.1	Mus musculus	mmu-Tsc1_0010	Tsc1	314	2
mmu_circ_BN_0009785.1	Mus musculus	mmu_circ_0009785	Tsc1	314	2
mmu-Tsc1_BB_0029.BSJ.1	Mus musculus	mmu-Tsc1_0029	Tsc1	314	2
mmu-Tsc1_BN_0002.2	Mus musculus	mmu-Tsc1_0002	Tsc1	314	2
mmu-Tsc1_BN_0003.1	Mus musculus	mmu-Tsc1_0003	Tsc1	314	2
hsa_circ_BB_0089306.BSJ.1	Homo sapiens	hsa_circ_0089306	TSC1	314	2
hsa_circ_BB_0089307.BSJ.2	Homo sapiens	hsa_circ_0089307	TSC1	314	2
hsa_circ_BN_0089305.2	Homo sapiens	hsa_circ_0089305	TSC1	314	2
hsa_circ_BN_0089305.3	Homo sapiens	hsa_circ_0089305	TSC1	314	2
hsa_circ_BN_0089307.1	Homo sapiens	hsa_circ_0089307	TSC1	314	2
hsa_circ_BN_0089306.2	Homo sapiens	hsa_circ_0089306	TSC1	314	2
hsa-TSC1_BN_0011.2	Homo sapiens	hsa-TSC1_0011	TSC1	314	2
hsa-TSC1_BN_0011.1	Homo sapiens	hsa-TSC1_0011	TSC1	314	2
hsa-TSC1_BN_0009.2	Homo sapiens	hsa-TSC1_0009	TSC1	314	2
hsa-TSC1_BN_0009.1	Homo sapiens	hsa-TSC1_0009	TSC1	314	2
hsa_circ_BN_0138208.1	Homo sapiens	hsa_circ_0138208	TSC1	314	2
hsa_circ_BN_0089307.2	Homo sapiens	hsa_circ_0089307	TSC1	314	2
hsa-TSC1_BN_0004.1	Homo sapiens	hsa-TSC1_0004	TSC1	314	2
mmu-Ttr_BB_0003.BSJ.1	Mus musculus	mmu-Ttr_0003	Ttr	317	2
hsa-TTR_BB_0003.BSJ.1	Homo sapiens	hsa-TTR_0003	TTR	317	2
mmu-Urod_BB_0006.BSJ.1	Mus musculus	mmu-Urod_0006	Urod	320	2
hsa_circ_BB_0012212.BSJ.1	Homo sapiens	hsa_circ_0012212	UROD	320	2
hsa_circ_BN_0012209.1	Homo sapiens	hsa_circ_0012209	UROD	320	2
hsa_circ_BN_0012210.1	Homo sapiens	hsa_circ_0012210	UROD	320	2
hsa_circ_BN_0012211.1	Homo sapiens	hsa_circ_0012211	UROD	320	2
hsa-XDH_BN_0003.2	Homo sapiens	hsa-XDH_0003	XDH	324	2
hsa-XDH_BN_0009.1	Homo sapiens	hsa-XDH_0009	XDH	324	2
TC-hsa-XDH_BN_0002.1	Homo sapiens	TC-hsa-XDH_0002	XDH	324	2
mmu-Xdh_BB_0011.BSJ.1	Mus musculus	mmu-Xdh_0011	Xdh	324	2
mmu-Apob_BB_0036.BSJ.1	Mus musculus	mmu-Apob_0036	Apob	328	2
hsa_circ_BB_0052926.BSJ.1	Homo sapiens	hsa_circ_0052926	APOB	328	2
hsa_circ_BB_0052906.BSJ.1	Homo sapiens	hsa_circ_0052906	APOB	328	2
hsa_circ_BB_0052902.BSJ.1	Homo sapiens	hsa_circ_0052902	APOB	328	2
mmu-Apob_BN_0001.1	Mus musculus	mmu-Apob_0001	Apob	328	2
hsa_circ_BB_0052896.BSJ.1	Homo sapiens	hsa_circ_0052896	APOB	328	2
hsa-APOB_BN_0044.2	Homo sapiens	hsa-APOB_0044	APOB	328	2
hsa-APOB_BN_0030.2	Homo sapiens	hsa-APOB_0030	APOB	328	2
hsa-APOB_BN_0100.1	Homo sapiens	hsa-APOB_0100	APOB	328	2
hsa-APOB_BN_0192.1	Homo sapiens	hsa-APOB_0192	APOB	328	2
hsa-APOB_BN_0133.2	Homo sapiens	hsa-APOB_0133	APOB	328	2
hsa-APOB_BN_0123.2	Homo sapiens	hsa-APOB_0123	APOB	328	2
hsa-APOB_BB_0025.BSJ.1	Homo sapiens	hsa-APOB_0025	APOB	328	2
mmu-Apob_BB_0014.BSJ.1	Mus musculus	mmu-Apob_0014	Apob	328	2
hsa-APOB_BN_0207.2	Homo sapiens	hsa-APOB_0207	APOB	328	2
hsa-APOB_BB_0131.BSJ.1	Homo sapiens	hsa-APOB_0131	APOB	328	2
hsa-APOB_BB_0076.BSJ.1	Homo sapiens	hsa-APOB_0076	APOB	328	2
TC-hsa-APOB_BN_0036.1	Homo sapiens	TC-hsa-APOB_0036	APOB	328	2
TC-hsa-APOB_BN_0031.2	Homo sapiens	TC-hsa-APOB_0031	APOB	328	2
TC-hsa-APOB_BN_0026.2	Homo sapiens	TC-hsa-APOB_0026	APOB	328	2
TC-hsa-APOB_BB_0030.BSJ.1	Homo sapiens	TC-hsa-APOB_0030	APOB	328	2
TC-hsa-APOB_BB_0025.BSJ.1	Homo sapiens	TC-hsa-APOB_0025	APOB	328	2
TC-hsa-APOB_BB_0023.BSJ.1	Homo sapiens	TC-hsa-APOB_0023	APOB	328	2
hsa_circ_BN_0052918.1	Homo sapiens	hsa_circ_0052918	APOB	328	2
hsa_circ_BN_0052917.2	Homo sapiens	hsa_circ_0052917	APOB	328	2
hsa_circ_BN_0052916.2	Homo sapiens	hsa_circ_0052916	APOB	328	2
hsa_circ_BN_0052914.2	Homo sapiens	hsa_circ_0052914	APOB	328	2
hsa_circ_BN_0052893.22	Homo sapiens	hsa_circ_0052893	APOB	328	2
hsa_circ_BN_0052913.2	Homo sapiens	hsa_circ_0052913	APOB	328	2
hsa_circ_BN_0052912.2	Homo sapiens	hsa_circ_0052912	APOB	328	2
hsa_circ_BN_0052896.21	Homo sapiens	hsa_circ_0052896	APOB	328	2
hsa_circ_BN_0052911.2	Homo sapiens	hsa_circ_0052911	APOB	328	2
hsa_circ_BN_0052910.2	Homo sapiens	hsa_circ_0052910	APOB	328	2
hsa_circ_BN_0052909.2	Homo sapiens	hsa_circ_0052909	APOB	328	2
hsa_circ_BN_0052907.3	Homo sapiens	hsa_circ_0052907	APOB	328	2
hsa_circ_BN_0052904.4	Homo sapiens	hsa_circ_0052904	APOB	328	2
hsa_circ_BN_0052903.4	Homo sapiens	hsa_circ_0052903	APOB	328	2
hsa_circ_BN_0052887.25	Homo sapiens	hsa_circ_0052887	APOB	328	2
hsa_circ_BN_0052888.25	Homo sapiens	hsa_circ_0052888	APOB	328	2
hsa_circ_BN_0052886.25	Homo sapiens	hsa_circ_0052886	APOB	328	2
hsa_circ_BN_0052891.22	Homo sapiens	hsa_circ_0052891	APOB	328	2
hsa_circ_BN_0052892.22	Homo sapiens	hsa_circ_0052892	APOB	328	2
hsa_circ_BN_0052889.25	Homo sapiens	hsa_circ_0052889	APOB	328	2
hsa_circ_BN_0052890.22	Homo sapiens	hsa_circ_0052890	APOB	328	2
mmu-Blmh_BB_0003.BSJ.1	Mus musculus	mmu-Blmh_0003	Blmh	330	2
hsa-BLMH_BB_0020.BSJ.1	Homo sapiens	hsa-BLMH_0020	BLMH	330	2
TC-hsa-BLMH_BB_0007.BSJ.1	Homo sapiens	TC-hsa-BLMH_0007	BLMH	330	2
hsa-BLMH_BB_0026.BSJ.1	Homo sapiens	hsa-BLMH_0026	BLMH	330	2
mmu-Blmh_BN_0004.3	Mus musculus	mmu-Blmh_0004	Blmh	330	2
mmu-Blmh_BN_0008.1	Mus musculus	mmu-Blmh_0008	Blmh	330	2
mmu-Blmh_BN_0012.1	Mus musculus	mmu-Blmh_0012	Blmh	330	2
hsa-BLMH_BB_0010.BSJ.1	Homo sapiens	hsa-BLMH_0010	BLMH	330	2
hsa-CHM_BN_0050.1	Homo sapiens	hsa-CHM_0050	CHM	334	2
hsa-CHM_BN_0055.1	Homo sapiens	hsa-CHM_0055	CHM	334	2
mmu-Chm_BN_0039.3	Mus musculus	mmu-Chm_0039	Chm	334	2
mmu-Chm_BN_0030.1	Mus musculus	mmu-Chm_0030	Chm	334	2
mmu-Chm_BN_0031.2	Mus musculus	mmu-Chm_0031	Chm	334	2
mmu-Chm_BN_0031.1	Mus musculus	mmu-Chm_0031	Chm	334	2
mmu-Chm_BN_0028.1	Mus musculus	mmu-Chm_0028	Chm	334	2
mmu_circ_BN_0016082.1	Mus musculus	mmu_circ_0016082	Chm	334	2
mmu-Chm_BN_0042.2	Mus musculus	mmu-Chm_0042	Chm	334	2
mmu-Chm_BN_0042.1	Mus musculus	mmu-Chm_0042	Chm	334	2
mmu-Chm_BN_0041.2	Mus musculus	mmu-Chm_0041	Chm	334	2
hsa-CHM_BB_0062.BSJ.1	Homo sapiens	hsa-CHM_0062	CHM	334	2
hsa-CHM_BN_0024.1	Homo sapiens	hsa-CHM_0024	CHM	334	2
mmu-Chm_BN_0001.1	Mus musculus	mmu-Chm_0001	Chm	334	2
mmu-Chm_BB_0042.BSJ.1	Mus musculus	mmu-Chm_0042	Chm	334	2
mmu-Chm_BB_0036.BSJ.1	Mus musculus	mmu-Chm_0036	Chm	334	2
mmu-Chm_BB_0031.BSJ.1	Mus musculus	mmu-Chm_0031	Chm	334	2
mmu-Chm_BB_0015.BSJ.1	Mus musculus	mmu-Chm_0015	Chm	334	2
mmu-Chm_BB_0007.BSJ.1	Mus musculus	mmu-Chm_0007	Chm	334	2
mmu-Chm_BB_0006.BSJ.1	Mus musculus	mmu-Chm_0006	Chm	334	2
TC-hsa-CHM_BN_0025.1	Homo sapiens	TC-hsa-CHM_0025	CHM	334	2
TC-hsa-CHM_BN_0023.1	Homo sapiens	TC-hsa-CHM_0023	CHM	334	2
TC-hsa-CHM_BN_0019.1	Homo sapiens	TC-hsa-CHM_0019	CHM	334	2
TC-hsa-CHM_BN_0018.1	Homo sapiens	TC-hsa-CHM_0018	CHM	334	2
TC-hsa-CHM_BN_0015.1	Homo sapiens	TC-hsa-CHM_0015	CHM	334	2
TC-hsa-CHM_BN_0014.1	Homo sapiens	TC-hsa-CHM_0014	CHM	334	2
TC-hsa-CHM_BN_0008.1	Homo sapiens	TC-hsa-CHM_0008	CHM	334	2
mmu-Chm_BN_0002.1	Mus musculus	mmu-Chm_0002	Chm	334	2
hsa-CHM_BN_0020.1	Homo sapiens	hsa-CHM_0020	CHM	334	2
hsa-CHM_BN_0019.1	Homo sapiens	hsa-CHM_0019	CHM	334	2
hsa-CHM_BN_0018.1	Homo sapiens	hsa-CHM_0018	CHM	334	2
hsa-CHM_BN_0010.1	Homo sapiens	hsa-CHM_0010	CHM	334	2
hsa-CHM_BN_0003.1	Homo sapiens	hsa-CHM_0003	CHM	334	2
mmu-Chm_BN_0016.3	Mus musculus	mmu-Chm_0016	Chm	334	2
mmu-Chm_BN_0015.1	Mus musculus	mmu-Chm_0015	Chm	334	2
mmu-Chm_BN_0011.1	Mus musculus	mmu-Chm_0011	Chm	334	2
mmu-Chm_BN_0008.1	Mus musculus	mmu-Chm_0008	Chm	334	2
SRR13142116_BB_42843gene=Chm.BSJ.1	Mus musculus	SRR13142116_42843	Chm	334	2
hsa-CHM_BN_0063.1	Homo sapiens	hsa-CHM_0063	CHM	334	2
hsa-CHM_BN_0064.1	Homo sapiens	hsa-CHM_0064	CHM	334	2
hsa_circ_BB_0140680.BSJ.1	Homo sapiens	hsa_circ_0140680	CHM	334	2
hsa_circ_BN_0091199.1	Homo sapiens	hsa_circ_0091199	CHM	334	2
hsa_circ_BN_0091200.1	Homo sapiens	hsa_circ_0091200	CHM	334	2
hsa_circ_BN_0140681.1	Homo sapiens	hsa_circ_0140681	CHM	334	2
hsa_circ_BN_0140682.1	Homo sapiens	hsa_circ_0140682	CHM	334	2
hsa_circ_BN_0140683.1	Homo sapiens	hsa_circ_0140683	CHM	334	2
hsa_circ_BN_0140684.1	Homo sapiens	hsa_circ_0140684	CHM	334	2
mmu-Ercc2_BN_0005.1	Mus musculus	mmu-Ercc2_0005	Ercc2	344	2
mmu-Ercc2_BB_0008.BSJ.1	Mus musculus	mmu-Ercc2_0008	Ercc2	344	2
mmu_circ_BN_0014055.1	Mus musculus	mmu_circ_0014055	Ercc2	344	2
mmu-Ercc2_BN_0002.1	Mus musculus	mmu-Ercc2_0002	Ercc2	344	2
TC-hsa-ERCC2_BN_0001.1	Homo sapiens	TC-hsa-ERCC2_0001	ERCC2	344	2
hsa-ERCC2_BN_0013.1	Homo sapiens	hsa-ERCC2_0013	ERCC2	344	2
TC-hsa-ERCC2_BB_0001.BSJ.1	Homo sapiens	TC-hsa-ERCC2_0001	ERCC2	344	2
mmu-Ercc2_BN_0006.1	Mus musculus	mmu-Ercc2_0006	Ercc2	344	2
mmu-Ercc2_BN_0008.1	Mus musculus	mmu-Ercc2_0008	Ercc2	344	2
hsa-ERCC2_BB_0022.BSJ.1	Homo sapiens	hsa-ERCC2_0022	ERCC2	344	2
hsa_circ_BN_0051468.1	Homo sapiens	hsa_circ_0051468	ERCC2	344	2
hsa_circ_BN_0051466.2	Homo sapiens	hsa_circ_0051466	ERCC2	344	2
hsa_circ_BN_0051467.1	Homo sapiens	hsa_circ_0051467	ERCC2	344	2
hsa-ERCC2_BB_0008.BSJ.1	Homo sapiens	hsa-ERCC2_0008	ERCC2	344	2
hsa_circ_BN_0051465.2	Homo sapiens	hsa_circ_0051465	ERCC2	344	2
hsa_circ_BN_0051464.4	Homo sapiens	hsa_circ_0051464	ERCC2	344	2
hsa-EXT2_BN_0032.2	Homo sapiens	hsa-EXT2_0032	EXT2	345	2
SRR13142121_BN_17329gene=Ext2.3	Mus musculus	SRR13142121_17329	Ext2	345	2
SRR13142121_BN_17329gene=Ext2.1	Mus musculus	SRR13142121_17329	Ext2	345	2
SRR13142116_BN_35443gene=Ext2.2	Mus musculus	SRR13142116_35443	Ext2	345	2
hsa-EXT2_BN_0026.2	Homo sapiens	hsa-EXT2_0026	EXT2	345	2
mmu-Ext2_BN_0023.2	Mus musculus	mmu-Ext2_0023	Ext2	345	2
hsa_circ_BN_0021795.1	Homo sapiens	hsa_circ_0021795	EXT2	345	2
SRR13142115_BN_39418gene=Ext2.2	Mus musculus	SRR13142115_39418	Ext2	345	2
mmu-Ext2_BN_0033.3	Mus musculus	mmu-Ext2_0033	Ext2	345	2
hsa_circ_BN_0021798.4	Homo sapiens	hsa_circ_0021798	EXT2	345	2
hsa_circ_BN_0021801.1	Homo sapiens	hsa_circ_0021801	EXT2	345	2
hsa_circ_BN_0095846.1	Homo sapiens	hsa_circ_0095846	EXT2	345	2
mmu-Ext2_BN_0033.1	Mus musculus	mmu-Ext2_0033	Ext2	345	2
hsa_circ_BB_0021797.BSJ.1	Homo sapiens	hsa_circ_0021797	EXT2	345	2
hsa-EXT2_BN_0018.4	Homo sapiens	hsa-EXT2_0018	EXT2	345	2
hsa-EXT2_BN_0013.1	Homo sapiens	hsa-EXT2_0013	EXT2	345	2
hsa-EXT2_BN_0011.2	Homo sapiens	hsa-EXT2_0011	EXT2	345	2
hsa-EXT2_BN_0002.1	Homo sapiens	hsa-EXT2_0002	EXT2	345	2
hsa-EXT2_BB_0030.BSJ.1	Homo sapiens	hsa-EXT2_0030	EXT2	345	2
hsa_circ_BN_0008355.1	Homo sapiens	hsa_circ_0008355	EXT2	345	2
hsa_circ_BN_0008830.1	Homo sapiens	hsa_circ_0008830	EXT2	345	2
hsa-EXT2_BN_0040.2	Homo sapiens	hsa-EXT2_0040	EXT2	345	2
mmu-Ext2_BN_0015.2	Mus musculus	mmu-Ext2_0015	Ext2	345	2
mmu-Ext2_BN_0004.2	Mus musculus	mmu-Ext2_0004	Ext2	345	2
mmu-Ext2_BN_0002.2	Mus musculus	mmu-Ext2_0002	Ext2	345	2
mmu-Ext2_BN_0001.2	Mus musculus	mmu-Ext2_0001	Ext2	345	2
TC-hsa-EXT2_BN_0015.1	Homo sapiens	TC-hsa-EXT2_0015	EXT2	345	2
TC-hsa-EXT2_BN_0010.2	Homo sapiens	TC-hsa-EXT2_0010	EXT2	345	2
TC-hsa-EXT2_BN_0009.1	Homo sapiens	TC-hsa-EXT2_0009	EXT2	345	2
TC-hsa-EXT2_BN_0019.1	Homo sapiens	TC-hsa-EXT2_0019	EXT2	345	2
hsa-EXT2_BN_0075.1	Homo sapiens	hsa-EXT2_0075	EXT2	345	2
TC-hsa-EXT2_BN_0020.2	Homo sapiens	TC-hsa-EXT2_0020	EXT2	345	2
TC-hsa-GPD2_BN_0025.3	Homo sapiens	TC-hsa-GPD2_0025	GPD2	352	2
mmu-Gpd2_BN_0011.1	Mus musculus	mmu-Gpd2_0011	Gpd2	352	2
mmu-Gpd2_BN_0012.1	Mus musculus	mmu-Gpd2_0012	Gpd2	352	2
SRR13142115_BN_58786gene=Gpd2.1	Mus musculus	SRR13142115_58786	Gpd2	352	2
mmu-Gpd2_BN_0028.1	Mus musculus	mmu-Gpd2_0028	Gpd2	352	2
mmu-Gpd2_BN_0005.1	Mus musculus	mmu-Gpd2_0005	Gpd2	352	2
TC-hsa-GPD2_BN_0025.2	Homo sapiens	TC-hsa-GPD2_0025	GPD2	352	2
hsa-GPD2_BB_0002.BSJ.1	Homo sapiens	hsa-GPD2_0002	GPD2	352	2
hsa_circ_BN_0005732.1	Homo sapiens	hsa_circ_0005732	GPD2	352	2
hsa-GPD2_BN_0003.1	Homo sapiens	hsa-GPD2_0003	GPD2	352	2
hsa-GPD2_BN_0007.1	Homo sapiens	hsa-GPD2_0007	GPD2	352	2
hsa-GPD2_BN_0008.1	Homo sapiens	hsa-GPD2_0008	GPD2	352	2
hsa-GPD2_BN_0008.4	Homo sapiens	hsa-GPD2_0008	GPD2	352	2
hsa-GPD2_BN_0009.1	Homo sapiens	hsa-GPD2_0009	GPD2	352	2
hsa-GPD2_BN_0011.1	Homo sapiens	hsa-GPD2_0011	GPD2	352	2
hsa-GPD2_BN_0014.1	Homo sapiens	hsa-GPD2_0014	GPD2	352	2
hsa-GPD2_BN_0030.1	Homo sapiens	hsa-GPD2_0030	GPD2	352	2
hsa_circ_BN_0008789.1	Homo sapiens	hsa_circ_0008789	GPD2	352	2
hsa-GPD2_BB_0051.BSJ.1	Homo sapiens	hsa-GPD2_0051	GPD2	352	2
hsa_circ_BN_0056755.1	Homo sapiens	hsa_circ_0056755	GPD2	352	2
hsa-GPD2_BB_0006.BSJ.1	Homo sapiens	hsa-GPD2_0006	GPD2	352	2
hsa_circ_BN_0117731.2	Homo sapiens	hsa_circ_0117731	GPD2	352	2
hsa_circ_BN_0117730.1	Homo sapiens	hsa_circ_0117730	GPD2	352	2
hsa_circ_BN_0117729.2	Homo sapiens	hsa_circ_0117729	GPD2	352	2
hsa_circ_BN_0117729.1	Homo sapiens	hsa_circ_0117729	GPD2	352	2
hsa_circ_BN_0056757.1	Homo sapiens	hsa_circ_0056757	GPD2	352	2
hsa_circ_BN_0056756.2	Homo sapiens	hsa_circ_0056756	GPD2	352	2
hsa_circ_BN_0056756.1	Homo sapiens	hsa_circ_0056756	GPD2	352	2
hsa_circ_BN_0056755.2	Homo sapiens	hsa_circ_0056755	GPD2	352	2
mmu-Gpd2_BN_0004.1	Mus musculus	mmu-Gpd2_0004	Gpd2	352	2
hsa-GPD2_BN_0033.2	Homo sapiens	hsa-GPD2_0033	GPD2	352	2
TC-hsa-GPD2_BN_0003.1	Homo sapiens	TC-hsa-GPD2_0003	GPD2	352	2
[truncated: 141,096 more rows]

## Sheet: circUBC
Evidence supported ORF ID	Species	CircRNA ID	Gene
NA	Drosophila melanogaster	SRR10043575_611	Ubi-p63E
SRR10043579_BB_652gene=Ubi-p63E.BSJ.1	Drosophila melanogaster	SRR10043579_652	Ubi-p63E
SRR18575339_BB_14236gene=Ubi-p5E.BSJ.1	Drosophila melanogaster	SRR18575339_14236	Ubi-p5E
SRR18575346_BB_22302gene=Ubi-p5E.BSJ.1	Drosophila melanogaster	SRR18575346_22302	Ubi-p5E
NA	Drosophila melanogaster	SRR10043573_644	Ubi-p63E
NA	Drosophila melanogaster	SRR10043573_645	Ubi-p63E
NA	Drosophila melanogaster	SRR10043573_686	Ubi-p63E
NA	Drosophila melanogaster	SRR10043573_687	Ubi-p63E
NA	Drosophila melanogaster	SRR10043573_688	Ubi-p63E
NA	Drosophila melanogaster	SRR10043573_701	Ubi-p5E
NA	Drosophila melanogaster	SRR10043575_612	Ubi-p63E
NA	Drosophila melanogaster	SRR10043575_613	Ubi-p63E
NA	Drosophila melanogaster	SRR10043576_622	Ubi-p5E
NA	Drosophila melanogaster	SRR10043576_625	Ubi-p5E
NA	Drosophila melanogaster	SRR10043577_777	Ubi-p63E
NA	Drosophila melanogaster	SRR10043577_786	Ubi-p63E
NA	Drosophila melanogaster	SRR10043578_663	Ubi-p63E
NA	Drosophila melanogaster	SRR10043579_653	Ubi-p63E
NA	Drosophila melanogaster	SRR10043580_614	Ubi-p63E
NA	Drosophila melanogaster	SRR10043580_615	Ubi-p5E
NA	Drosophila melanogaster	SRR18432797_30528	Ubi-p5E
NA	Drosophila melanogaster	SRR18432797_30596	Ubi-p5E
NA	Drosophila melanogaster	SRR18432808_7778	Ubi-p5E
NA	Drosophila melanogaster	SRR18575342_32600	Ubi-p63E
NA	Drosophila melanogaster	SRR18575342_32608	Ubi-p63E
SRR18575351_BB_26597gene=Ubi-p5E.BSJ.1	Drosophila melanogaster	SRR18575351_26597	Ubi-p5E
NA	Drosophila melanogaster	SRR18575351_26598	Ubi-p5E
NA	Drosophila melanogaster	SRR18575351_28191	Ubi-p5E
NA	Drosophila melanogaster	SRR18575352_24034	Ubi-p5E
NA	Drosophila melanogaster	SRR18575352_26456	Ubi-p5E
NA	Drosophila melanogaster	SRR18575352_27803	Ubi-p63E
NA	Drosophila melanogaster	SRR18575352_27841	Ubi-p5E
NA	Danio rerio	SRR23060057_26655	ubc
NA	Danio rerio	SRR23060057_26911	ubc
NA	Danio rerio	SRR23060060_26214	ubc
SRR23060062_BN_27742gene=ubc.1	Danio rerio	SRR23060062_27742	ubc
SRR9849855_BN_10650gene=ubc.1	Danio rerio	SRR9849855_10650	ubc
NA	Danio rerio	SRR9849863_3000	ubc
NA	Mus musculus	SRR11425581_173853	Ubc
NA	Mus musculus	SRR11425582_165309	Ubc
ORF_UBC_0001_BB_001	Homo sapiens	circ_UBC_0001	UBC
ORF_UBC_0002_BB_001	Homo sapiens	circ_UBC_0002	UBC
ORF_UBC_0003_BN_001	Homo sapiens	circ_UBC_0003	UBC
ORF_UBC_0005_BN_001	Homo sapiens	circ_UBC_0005	UBC
ORF_UBC_0007_BB_001	Homo sapiens	circ_UBC_0007	UBC
ORF_UBC_0008_BN_001	Homo sapiens	circ_UBC_0008	UBC
ORF_UBC_0009_BN_001	Homo sapiens	circ_UBC_0009	UBC
ORF_UBC_0011_BB_001	Homo sapiens	circ_UBC_0011	UBC
ORF_UBC_0013_BN_001	Homo sapiens	circ_UBC_0013	UBC
ORF_UBC_0024_BN_001	Homo sapiens	circ_UBC_0024	UBC
ORF_UBC_0026_BN_001	Homo sapiens	circ_UBC_0026	UBC
ORF_UBC_0028_BB_001	Homo sapiens	circ_UBC_0028	UBC
ORF_UBC_0032_BB_001	Homo sapiens	circ_UBC_0032	UBC
ORF_UBC_0032_BN_001	Homo sapiens	circ_UBC_0032	UBC
ORF_UBC_0034_BB_001	Homo sapiens	circ_UBC_0034	UBC
ORF_UBC_0039_BN_001	Homo sapiens	circ_UBC_0039	UBC
ORF_UBC_0040_BB_001	Homo sapiens	circ_UBC_0040	UBC
ORF_UBC_0044_BN_001	Homo sapiens	circ_UBC_0044	UBC
ORF_UBC_0046_BB_001	Homo sapiens	circ_UBC_0046	UBC
ORF_UBC_0046_BN_001	Homo sapiens	circ_UBC_0046	UBC
ORF_UBC_0048_BN_001	Homo sapiens	circ_UBC_0048	UBC
ORF_UBC_0049_BN_001	Homo sapiens	circ_UBC_0049	UBC
ORF_UBC_0050_BN_001	Homo sapiens	circ_UBC_0050	UBC
ORF_UBC_0051_BB_001	Homo sapiens	circ_UBC_0051	UBC
ORF_UBC_0056_BB_001	Homo sapiens	circ_UBC_0056	UBC
ORF_UBC_0057_BB_001	Homo sapiens	circ_UBC_0057	UBC
ORF_UBC_0060_BB_001	Homo sapiens	circ_UBC_0060	UBC
ORF_UBC_0065_BN_001	Homo sapiens	circ_UBC_0065	UBC
ORF_UBC_0066_BN_001	Homo sapiens	circ_UBC_0066	UBC
ORF_UBC_0067_BB_001	Homo sapiens	circ_UBC_0067	UBC
ORF_UBC_0068_BB_001	Homo sapiens	circ_UBC_0068	UBC
ORF_UBC_0068_BN_001	Homo sapiens	circ_UBC_0068	UBC
ORF_UBC_0072_BN_001	Homo sapiens	circ_UBC_0072	UBC
ORF_UBC_0075_BB_001	Homo sapiens	circ_UBC_0075	UBC
NA	Homo sapiens	circ_UBC_0076	UBC
ORF_UBC_0082_BN_001	Homo sapiens	circ_UBC_0082	UBC
ORF_UBC_0020_BB_001	Homo sapiens	circ_UBC_0020	UBC
ORF_UBC_0025_BB_001	Homo sapiens	circ_UBC_0025	UBC
